# Supplementary material
Source: publisher figshare collection journal article supplement (https://gsajournals.figshare.com/ndownloader/files/20187333)
Supplement: Supplementary file 1 [file 20187333]

## Sheet: Overview
	Total	Up-regulated	Down-regulated	In Koncz list
cwc16a-1	7157	5066	2091	124
cwc16a-2	2723	1711	1012	42
cwc16a-3	1855	1109	746	28
All cwc16a alleles	941	676	265	14

## Sheet: cwc16a-1
Gene ID	logFC	logCPM	PValue	FDR	Direction of change	In Koncz list?	has SNP/indels?	SNPs/indels
AT1G24825	-3.93319	6.60612	1.07013e-194	3.60429e-190	DOWN	no	NO
AT1G25175	1.95724	7.96333	6.45459e-63	1.08699e-58	UP	no	NO
AT3G45970	3.61031	3.68145	3.41386e-60	3.83274e-56	UP	no	NO
AT5G35935	-3.46398	3.60734	1.10131e-58	9.27329e-55	DOWN	no	YES	5:14088705:C-T;exonic_variant
AT3G54500	-1.46313	8.42956	6.67656e-45	4.49747e-41	DOWN	no	NO
AT3G07300	1.44077	5.56565	5.50358e-44	3.08943e-40	UP	no	NO
AT1G13360	-1.66621	6.13324	6.77079e-44	3.25782e-40	DOWN	no	NO
AT4G17460	2.15811	5.53126	4.73038e-43	1.99155e-39	UP	no	NO
AT3G05380	1.41868	5.60556	5.92063e-41	2.2157e-37	UP	no	NO
AT5G45710	1.48531	4.89621	3.80008e-40	1.2799e-36	UP	no	YES	5:18542509:C-T;exonic_variant,5:18542509:C-T;protein_coding;missense;CCT>TCT;P>S
AT3G57660	1.41732	4.91694	6.18371e-40	1.8934e-36	UP	no	NO
AT5G57560	3.20455	8.27495	1.21883e-37	3.42095e-34	UP	no	NO
AT2G41100	3.0574	6.39848	2.25268e-37	5.83636e-34	UP	no	NO
AT4G04223	2.93578	3.09573	3.15934e-36	7.60069e-33	UP	no	NO
AT2G20815	1.62716	4.04614	1.54619e-34	3.47181e-31	UP	no	NO
AT4G37260	2.36141	5.92708	2.25958e-34	4.75655e-31	UP	no	NO
AT4G13577	-3.67126	2.32307	3.26262e-34	6.46403e-31	DOWN	no	NO
AT3G26932	-1.36909	4.64728	2.09871e-33	3.92704e-30	DOWN	no	NO
AT3G53650	2.21303	2.94315	1.68898e-32	2.99403e-29	UP	no	NO
AT1G49730	1.19112	5.83725	1.95633e-32	3.29456e-29	UP	no	NO
AT3G47630	1.23085	4.46118	1.63366e-31	2.62016e-28	UP	no	NO
AT4G19170	-1.38501	8.36043	3.23526e-31	4.95303e-28	DOWN	no	NO
AT3G09450	-3.89664	2.45567	9.16894e-30	1.34269e-26	DOWN	no	NO
AT3G14075	1.09488	4.97881	1.01873e-29	1.42966e-26	UP	no	NO
AT3G06530	1.40431	4.87542	2.46118e-29	3.3158e-26	UP	no	NO
AT4G35270	-1.34332	4.41939	3.63735e-29	4.71191e-26	DOWN	no	NO
AT5G01820	-1.4588	5.99455	4.06548e-29	5.07146e-26	DOWN	no	NO
AT3G47420	-2.00458	6.19775	6.84967e-29	8.23942e-26	DOWN	no	NO
AT3G47500	-1.68649	6.19887	8.38249e-29	9.73554e-26	DOWN	no	NO
AT4G16680	-2.05341	3.55707	1.57423e-28	1.76739e-25	DOWN	no	YES	4:9390455:C-CCTTCTTAGGCATCTTCACACCATCATTCAACATAATCTCGTCTTTGA;exonic_variant&protein_coding,4:9388357:G-A;exonic_variant,4:9388357:G-A;protein_coding;missense;ACA>ATA;T>I,4:9390455:C-CCTTCTTAGGCATCTTCACACCATCATTCAACATAATCTCGTCTTTGA;exonic_variant&splice_donor_region_variant&protein_coding
AT5G25230	3.61984	0.659467	1.67736e-28	1.82242e-25	UP	yes	NO
AT2G30930	1.8431	5.26426	1.75477e-28	1.84695e-25	UP	no	NO
AT4G20060	1.35379	4.2597	2.08368e-28	2.12668e-25	UP	no	NO
AT2G27830	1.23074	6.86583	2.49962e-28	2.47617e-25	UP	no	NO
AT1G21910	2.84867	5.01779	3.31945e-28	3.19436e-25	UP	no	NO
AT2G06950	1.55087	5.29541	3.78703e-28	3.54308e-25	UP	no	NO
AT5G10140	3.54538	2.68459	4.38336e-28	3.99016e-25	UP	no	NO
AT3G01600	3.02203	0.807288	6.54622e-28	5.80219e-25	UP	no	NO
AT5G61590	1.71514	6.42838	1.08907e-27	9.40537e-25	UP	no	NO
AT2G36070	1.13579	5.16145	1.30912e-27	1.10231e-24	UP	no	NO
AT1G25400	3.04372	2.83007	2.57907e-27	2.11867e-24	UP	no	NO
AT1G01620	0.986792	8.954	4.08748e-27	3.27787e-24	UP	no	NO
AT3G43850	2.17345	3.17444	4.23894e-27	3.32027e-24	UP	no	NO
AT1G29940	1.28272	5.0125	5.25425e-27	3.93773e-24	UP	no	NO
AT2G47410	1.06164	6.59564	5.26106e-27	3.93773e-24	UP	no	NO
AT1G69890	2.45036	4.12764	6.26343e-27	4.58606e-24	UP	no	NO
AT2G41640	1.16441	5.32287	1.4217e-26	1.01881e-23	UP	no	NO
AT2G20570	-1.52434	6.67483	4.19316e-26	2.94229e-23	DOWN	no	NO
AT1G35140	2.91142	4.8001	4.85799e-26	3.33922e-23	UP	no	NO
AT4G13575	-1.9758	6.01676	5.44721e-26	3.66935e-23	DOWN	no	YES	4:7892680:AATAT-A,AAT;intronic_variant
AT1G32170	1.50051	3.73194	6.09361e-26	4.02429e-23	UP	no	NO
AT5G51550	1.73982	5.19092	7.0282e-26	4.55225e-23	UP	no	NO
AT2G46790	-1.92776	6.15901	1.77882e-25	1.13043e-22	DOWN	no	NO
AT4G32480	1.33799	6.39643	2.07701e-24	1.29548e-21	UP	no	NO
AT1G25440	-1.11508	7.3783	6.96199e-24	4.26339e-21	DOWN	no	NO
AT4G31800	2.76064	3.40293	9.54854e-24	5.74293e-21	UP	no	NO
AT2G42840	1.16598	7.5174	9.98208e-24	5.89836e-21	UP	no	NO
AT1G67105	2.725	4.68818	1.08623e-23	6.30782e-21	UP	no	YES	1:25058254:G-GA;exonic_variant
AT3G12320	-1.72984	6.19115	2.29024e-23	1.30741e-20	DOWN	no	NO
AT5G64100	1.82107	4.8576	2.67939e-23	1.50408e-20	UP	no	NO
AT4G37240	2.51117	1.43911	2.85681e-23	1.57738e-20	UP	no	NO
AT4G02330	2.52573	3.07064	4.00537e-23	2.17588e-20	UP	no	NO
AT3G10720	1.22499	6.53955	4.3817e-23	2.34254e-20	UP	no	NO
AT5G06120	0.94199	6.06256	5.07857e-23	2.67268e-20	UP	no	YES	5:1848991:T-C;exonic_variant,5:1848991:T-C;protein_coding;sense;TTG>CTG;L>L
AT1G27921	-2.48499	1.90487	6.13526e-23	3.1791e-20	DOWN	no	NO
AT1G43675	-2.69737	2.27715	9.55367e-23	4.87541e-20	DOWN	no	NO
AT5G15948	-2.13465	5.75566	1.15564e-22	5.80943e-20	DOWN	no	NO
AT4G08035	-1.19593	4.50553	1.46611e-22	7.26179e-20	DOWN	no	NO
AT3G56990	1.26434	4.10958	1.53679e-22	7.50156e-20	UP	no	NO
AT3G11964	1.05223	5.39464	1.57502e-22	7.57833e-20	UP	no	NO
AT5G43630	-1.03054	5.89741	1.65522e-22	7.85203e-20	DOWN	no	NO
AT3G28500	3.65362	-0.20162	1.76442e-22	8.25381e-20	UP	no	NO
AT4G23680	1.77049	7.42333	2.47298e-22	1.14099e-19	UP	no	NO
AT4G21880	1.72005	3.36543	2.85494e-22	1.29942e-19	UP	no	NO
AT4G02760	1.29376	3.4057	3.37914e-22	1.51751e-19	UP	no	NO
AT5G44680	1.35012	6.51938	3.63473e-22	1.61081e-19	UP	no	NO
AT1G30590	-1.01277	5.64524	4.63614e-22	2.02792e-19	DOWN	no	NO
AT5G08150	2.43986	1.73143	6.25183e-22	2.69959e-19	UP	no	NO
AT3G15310	-3.15881	1.03321	7.24411e-22	3.08847e-19	DOWN	no	NO
AT5G54470	-2.57265	2.32682	8.81513e-22	3.71128e-19	DOWN	no	NO
AT4G36850	1.42574	8.51962	9.97272e-22	4.14681e-19	UP	no	YES	4:17354711:GA-G;intronic_variant,4:17353918:GA-G;splice_acceptor_region_variant
AT5G67480	2.17681	5.70909	1.05504e-21	4.3335e-19	UP	no	NO
AT4G23990	-1.50412	3.55528	1.13816e-21	4.61859e-19	DOWN	no	NO
AT5G44190	-1.19394	7.94438	1.43863e-21	5.76838e-19	DOWN	no	NO
AT3G26310	-1.34216	4.50646	1.82183e-21	7.21893e-19	DOWN	no	NO
AT4G17500	2.18653	5.34651	1.94033e-21	7.59909e-19	UP	no	NO
AT1G29030	1.18989	3.85855	1.99883e-21	7.73285e-19	UP	no	NO
AT3G03300	1.19351	5.86304	2.0204e-21	7.73285e-19	UP	no	NO
AT1G65370	1.54754	5.63051	2.5846e-21	9.78111e-19	UP	no	NO
AT4G34810	3.66406	-0.569481	3.42642e-21	1.28228e-18	UP	no	NO
AT1G34760	1.07557	4.39128	3.80052e-21	1.40665e-18	UP	no	NO
AT1G64900	-1.20738	5.94513	6.0425e-21	2.21215e-18	DOWN	no	NO
AT3G04140	-1.56485	3.92626	9.44375e-21	3.42016e-18	DOWN	no	NO
AT4G08950	2.771	7.62484	1.25208e-20	4.48632e-18	UP	no	NO
AT5G17250	1.14793	4.10618	1.36827e-20	4.85102e-18	UP	no	NO
AT4G25990	1.60047	2.93862	1.42032e-20	4.9831e-18	UP	no	NO
AT5G61440	1.80934	2.79776	2.04304e-20	7.09398e-18	UP	no	NO
AT5G44020	1.42363	8.04977	2.49098e-20	8.5611e-18	UP	no	NO
AT1G22530	2.15623	6.04829	2.6731e-20	9.09421e-18	UP	no	NO
AT2G36895	-0.935109	5.52397	2.89472e-20	9.74971e-18	DOWN	no	NO
AT4G28040	1.17336	7.00689	3.94476e-20	1.31548e-17	UP	no	NO
AT5G25240	2.45621	3.38301	4.88673e-20	1.61363e-17	UP	no	NO
AT3G27000	1.15504	3.83805	5.61549e-20	1.83627e-17	UP	no	NO
AT4G30280	2.64596	4.42326	7.27717e-20	2.35675e-17	UP	no	YES	4:14827204:G-T;exonic_variant
AT2G17230	3.20436	5.68339	7.3987e-20	2.37329e-17	UP	no	NO
AT3G45210	-1.62934	4.05249	7.58604e-20	2.41043e-17	DOWN	no	NO
AT3G49940	0.984276	5.72639	7.82089e-20	2.46183e-17	UP	no	NO
AT1G55750	0.925758	4.84152	8.1159e-20	2.53103e-17	UP	no	NO
AT3G62360	0.894575	6.68197	1.18753e-19	3.66946e-17	UP	no	NO
AT1G03410	-1.24275	4.03558	1.40445e-19	4.3003e-17	DOWN	no	NO
AT1G03870	2.32114	5.73966	1.76334e-19	5.35053e-17	UP	no	NO
AT5G63450	2.69486	4.67584	2.18521e-19	6.57145e-17	UP	no	NO
AT5G67300	2.25749	6.76846	2.22418e-19	6.62942e-17	UP	no	NO
AT3G60690	-1.24751	4.26444	3.39917e-19	1.00428e-16	DOWN	no	NO
AT1G52100	-0.97016	5.61762	4.28931e-19	1.25625e-16	DOWN	no	YES	1:19383685:A-AC;splice_donor_variant,1:19383685:A-AC;exonic_variant&protein_coding
AT3G07770	1.01102	5.62557	5.1216e-19	1.48707e-16	UP	no	NO
AT1G11380	1.27741	3.59269	5.31343e-19	1.52959e-16	UP	no	NO
AT1G72416	3.08	3.4565	5.8935e-19	1.68219e-16	UP	no	NO
AT1G20390	-1.62203	6.35893	6.25609e-19	1.77068e-16	DOWN	no	NO
AT2G01690	0.818326	6.4146	6.41831e-19	1.80146e-16	UP	no	NO
AT5G45140	1.13728	4.8057	6.63409e-19	1.84663e-16	UP	no	NO
AT5G57160	0.921991	4.94689	6.72928e-19	1.85778e-16	UP	no	NO
AT2G03760	1.24973	4.58711	8.52511e-19	2.33442e-16	UP	no	NO
AT5G43740	-1.01875	4.59101	9.90676e-19	2.69089e-16	DOWN	no	NO
AT1G13530	2.42398	1.59324	1.09066e-18	2.93877e-16	UP	no	NO
AT2G40700	1.06383	4.03586	1.14588e-18	3.06305e-16	UP	no	NO
AT3G23990	0.968366	5.91357	1.16411e-18	3.08727e-16	UP	no	NO
AT4G25290	-1.12099	5.61996	1.55759e-18	4.09854e-16	DOWN	no	NO
AT2G15020	-3.46886	5.50243	1.94823e-18	5.06881e-16	DOWN	no	NO
AT1G77640	3.06794	-0.163695	1.95643e-18	5.06881e-16	UP	no	NO
AT2G38790	1.19124	4.32961	2.30134e-18	5.9169e-16	UP	no	NO
AT1G63810	1.21535	4.11162	2.35963e-18	6.02081e-16	UP	no	NO
AT4G16880	-1.35249	5.2721	2.38013e-18	6.02745e-16	DOWN	no	NO
AT2G31380	-1.5682	5.91606	2.4878e-18	6.25311e-16	DOWN	no	NO
AT4G26850	-1.1969	8.49009	4.1154e-18	1.02675e-15	DOWN	no	NO
AT1G32920	1.86627	5.22096	4.39121e-18	1.0875e-15	UP	no	NO
AT3G17609	-1.57067	3.89683	4.65305e-18	1.14394e-15	DOWN	no	NO
AT3G15500	2.18923	4.379	4.81351e-18	1.17481e-15	UP	no	NO
AT5G15700	1.19326	3.59443	5.72723e-18	1.38244e-15	UP	no	NO
AT2G01422	-2.39297	4.07196	5.74632e-18	1.38244e-15	DOWN	no	NO
AT1G76720	-1.38807	3.4591	5.97001e-18	1.42607e-15	DOWN	no	NO
AT1G66160	2.07697	2.75294	7.08285e-18	1.67998e-15	UP	no	NO
AT1G80080	-1.15587	4.70659	1.0227e-17	2.40879e-15	DOWN	no	NO
AT3G59250	-1.86344	1.83824	1.3336e-17	3.11923e-15	DOWN	no	NO
AT2G39870	1.07541	5.32364	1.82966e-17	4.24998e-15	UP	no	NO
AT4G13810	-1.34227	4.41702	2.2918e-17	5.28698e-15	DOWN	no	NO
AT3G53460	1.03277	8.5582	2.37672e-17	5.44559e-15	UP	no	NO
AT2G14890	0.916769	6.38107	2.39611e-17	5.45293e-15	UP	no	NO
AT5G59960	0.869488	6.93223	2.87677e-17	6.50286e-15	UP	no	NO
AT3G26290	-1.05131	6.83308	3.13152e-17	7.03152e-15	DOWN	no	NO
AT5G15550	1.03931	4.23219	3.25305e-17	7.25602e-15	UP	no	NO
AT1G77890	1.07327	4.06049	3.31541e-17	7.34648e-15	UP	no	NO
AT5G03204	3.50229	-0.240309	4.74628e-17	1.04483e-14	UP	no	NO
AT1G56110	1.18312	5.77367	5.13025e-17	1.12203e-14	UP	no	NO
AT5G10946	-1.11953	3.61694	5.16467e-17	1.12227e-14	DOWN	no	NO
AT5G54380	1.88781	5.95451	5.36817e-17	1.15901e-14	UP	no	NO
AT3G02300	-0.91723	5.73495	5.47153e-17	1.1738e-14	DOWN	no	NO
AT4G08093	3.31353	0.696332	5.75804e-17	1.22745e-14	UP	no	NO
AT4G17490	3.08504	2.90353	5.85049e-17	1.23931e-14	UP	no	NO
AT1G66540	-1.89083	2.94982	6.10036e-17	1.28416e-14	DOWN	no	NO
AT1G03020	-5.35996	0.408844	7.02859e-17	1.47037e-14	DOWN	no	NO
AT3G13277	-1.4786	3.53686	8.12821e-17	1.68992e-14	DOWN	no	NO
AT4G12020	0.982218	5.74491	8.30697e-17	1.71649e-14	UP	no	NO
AT2G19650	-1.96917	2.8982	8.71604e-17	1.79003e-14	DOWN	no	NO
AT1G06720	1.05014	4.49365	9.68934e-17	1.97786e-14	UP	no	NO
AT4G24700	-1.85788	2.8728	9.81936e-17	1.98446e-14	DOWN	no	NO
AT5G45820	-1.0148	5.8844	9.83954e-17	1.98446e-14	DOWN	no	NO
AT1G68990	1.0214	4.53434	1.52863e-16	3.06464e-14	UP	no	NO
AT1G15670	1.5435	4.73784	1.55202e-16	3.09311e-14	UP	no	NO
AT1G17970	0.917764	4.56543	1.83857e-16	3.64264e-14	UP	no	NO
AT5G03555	-1.08171	5.27229	1.99168e-16	3.92292e-14	DOWN	no	NO
AT1G53830	2.38411	2.99881	2.22582e-16	4.3586e-14	UP	no	NO
AT3G08960	0.784039	5.44591	2.35859e-16	4.59189e-14	UP	no	NO
AT2G29210	0.774446	6.28921	2.70432e-16	5.23473e-14	UP	yes	NO
AT2G23840	-0.853443	5.68265	2.99585e-16	5.76591e-14	DOWN	no	NO
AT2G34600	4.9633	3.16578	3.13936e-16	5.99105e-14	UP	no	NO
AT2G02950	0.963377	5.02312	3.14841e-16	5.99105e-14	UP	no	NO
AT4G15800	1.01983	4.69771	3.92733e-16	7.43126e-14	UP	no	YES	4:8985692:TG-T;exonic_variant,4:8985631:AT-A;exonic_variant,4:8985599:TTG-T;exonic_variant,4:8985758:TG-T;exonic_variant,4:8985638:CG-C;exonic_variant,4:8985806:GT-G;exonic_variant,4:8985723:AT-A;exonic_variant
AT4G24050	-1.00881	4.12545	4.05924e-16	7.63794e-14	DOWN	no	NO
AT3G43210	1.12686	4.25691	4.15304e-16	7.77103e-14	UP	no	NO
AT2G33830	1.37748	8.07022	4.25371e-16	7.89298e-14	UP	no	NO
AT5G27660	1.32007	3.47627	4.26508e-16	7.89298e-14	UP	no	NO
AT5G20710	3.32632	2.36896	4.32523e-16	7.96055e-14	UP	no	NO
AT1G09300	1.10817	3.49118	5.49392e-16	1.00566e-13	UP	no	YES	1:3008063:A-AG;exonic_variant&protein_coding,1:3008063:A-AG;exonic_variant
AT5G47220	2.57552	5.38977	6.06063e-16	1.10339e-13	UP	no	NO
AT3G52140	0.848735	6.71128	6.48418e-16	1.17416e-13	UP	no	NO
AT4G04940	1.41054	2.9776	6.8826e-16	1.23904e-13	UP	no	NO
AT5G12940	1.82933	3.85458	6.91603e-16	1.23904e-13	UP	no	NO
AT3G44990	-1.07334	6.65429	6.96516e-16	1.24124e-13	DOWN	no	NO
AT1G12930	0.811361	5.25153	7.03722e-16	1.24748e-13	UP	no	NO
AT5G01770	0.870906	4.58914	7.99836e-16	1.41043e-13	UP	no	NO
AT2G27690	3.811	2.94332	8.46711e-16	1.48532e-13	UP	no	NO
AT4G12420	1.06358	7.0245	9.00695e-16	1.57183e-13	UP	no	NO
AT3G18610	1.91094	1.53438	9.20778e-16	1.59673e-13	UP	no	NO
AT3G44450	-2.88014	1.79812	9.24444e-16	1.59673e-13	DOWN	no	NO
AT1G12240	1.44453	8.38117	9.69714e-16	1.66637e-13	UP	no	NO
AT1G02660	1.90879	5.3223	1.00815e-15	1.72363e-13	UP	no	NO
AT4G14970	1.3235	2.76266	1.12525e-15	1.91412e-13	UP	no	YES	4:8559300:T-TG;splice_acceptor_region_variant
AT3G05020	0.831806	5.258	1.13984e-15	1.9292e-13	UP	no	NO
AT2G02100	1.40995	6.6312	1.14885e-15	1.93472e-13	UP	no	NO
AT4G02930	1.02431	5.46947	1.19954e-15	2.01004e-13	UP	no	NO
AT2G22710	3.01878	0.973056	1.25743e-15	2.09661e-13	UP	no	NO
AT1G72150	0.854485	9.34143	1.37013e-15	2.27326e-13	UP	no	NO
AT1G17960	2.06597	1.12727	1.39787e-15	2.30793e-13	UP	no	YES	1:6181512:T-TG;intronic_variant
AT4G13900	-2.19272	3.69339	1.43811e-15	2.36278e-13	DOWN	no	YES	4:8041373:G-A;exonic_variant,4:8036782:C-A;exonic_variant
AT2G41630	0.791307	5.72784	1.52157e-15	2.48777e-13	UP	no	NO
AT2G15090	1.01229	6.7889	1.56111e-15	2.54008e-13	UP	no	NO
AT2G25740	0.908727	4.60828	1.6326e-15	2.64364e-13	UP	no	YES	2:10981280:G-A;intronic_variant
AT5G54585	-2.10214	4.33528	1.82307e-15	2.93414e-13	DOWN	no	NO
AT4G10470	-0.986863	3.66208	1.82943e-15	2.93414e-13	DOWN	no	NO
AT1G73870	-1.02215	6.37891	1.93287e-15	3.08536e-13	DOWN	no	NO
AT1G03580	1.66624	2.61066	1.97616e-15	3.13958e-13	UP	no	NO
AT3G01800	1.38866	2.91728	2.23105e-15	3.52473e-13	UP	no	NO
AT5G13950	0.758221	6.78195	2.23952e-15	3.52473e-13	UP	no	NO
AT1G55910	-1.16998	3.84221	2.55978e-15	4.01005e-13	DOWN	no	NO
AT1G18570	1.17634	4.22655	2.66227e-15	4.15129e-13	UP	no	NO
AT5G14840	-1.08058	5.35866	3.1179e-15	4.83935e-13	DOWN	no	YES	5:4798460:G-A;exonic_variant
AT3G27280	1.08853	4.07892	3.44414e-15	5.32119e-13	UP	no	NO
AT2G19800	1.88937	3.87075	3.54743e-15	5.45575e-13	UP	no	NO
AT3G05200	0.942008	5.03556	3.62647e-15	5.55197e-13	UP	no	NO
AT1G22190	0.895862	5.96143	4.74362e-15	7.2294e-13	UP	no	NO
AT4G30270	1.99844	8.06548	5.0275e-15	7.62753e-13	UP	no	NO
AT1G65950	0.836743	4.85278	5.47889e-15	8.27508e-13	UP	no	NO
AT2G38220	3.47979	-0.627241	5.72881e-15	8.61392e-13	UP	no	NO
AT3G51400	2.22455	1.21734	5.81684e-15	8.70742e-13	UP	no	NO
AT1G44350	2.29034	4.91957	8.804e-15	1.31207e-12	UP	no	NO
AT4G35100	0.771194	8.92071	9.21694e-15	1.35824e-12	UP	no	NO
AT5G45280	1.12979	4.76382	9.22911e-15	1.35824e-12	UP	no	NO
AT3G62460	1.16236	3.39087	9.25634e-15	1.35824e-12	UP	no	NO
AT1G74560	0.962769	6.72142	9.2751e-15	1.35824e-12	UP	no	NO
AT4G14130	3.01591	5.93926	9.53793e-15	1.39068e-12	UP	no	NO
AT3G05490	1.42839	4.18233	9.62427e-15	1.39722e-12	UP	no	NO
AT5G50780	0.833844	4.84515	9.87617e-15	1.42764e-12	UP	no	NO
AT4G17840	-0.819421	7.21522	1.01325e-14	1.45844e-12	DOWN	no	NO
AT1G61100	1.49326	6.7213	1.03656e-14	1.48563e-12	UP	no	NO
AT3G21020	-2.48897	0.0734758	1.12313e-14	1.60289e-12	DOWN	no	NO
AT4G02070	0.86044	4.16765	1.16138e-14	1.65049e-12	UP	no	NO
AT4G21800	0.760578	4.75785	1.20646e-14	1.70734e-12	UP	no	NO
AT4G37680	-0.852239	5.81113	1.34861e-14	1.90053e-12	DOWN	no	NO
AT1G04240	1.09128	5.34408	1.35575e-14	1.90263e-12	UP	no	NO
AT3G52500	1.06907	5.97418	1.3811e-14	1.93015e-12	UP	no	NO
AT4G38860	-1.33792	5.57528	1.39342e-14	1.93933e-12	DOWN	no	NO
AT3G15010	0.790148	6.00207	1.44127e-14	1.99768e-12	UP	no	NO
AT3G53800	0.959008	6.0382	1.50975e-14	2.08165e-12	UP	no	NO
AT4G30990	0.866727	5.07108	1.51422e-14	2.08165e-12	UP	no	YES	4:15092893:T-TC;splice_acceptor_region_variant,4:15092893:T-TC;exonic_variant,4:15092893:T-TC;exonic_variant&protein_coding
AT2G01290	-1.21105	4.5751	1.5279e-14	2.09192e-12	DOWN	no	NO
AT1G51460	1.20142	3.37746	1.61559e-14	2.20303e-12	UP	no	NO
AT2G40475	-2.0099	3.73794	1.744e-14	2.36853e-12	DOWN	no	NO
AT3G10020	0.720793	7.85703	1.8438e-14	2.49402e-12	UP	no	NO
AT4G08170	1.16404	4.28453	1.91045e-14	2.57384e-12	UP	no	NO
AT3G22190	0.781594	5.27719	2.05078e-14	2.75188e-12	UP	no	NO
AT3G62420	1.00483	5.89021	2.2503e-14	3.00764e-12	UP	no	NO
AT1G50040	3.76692	2.28057	2.27742e-14	3.03185e-12	UP	no	NO
AT3G54810	1.82518	5.94315	2.42103e-14	3.21035e-12	UP	no	NO
AT3G49780	1.22898	4.0969	2.53615e-14	3.3498e-12	UP	no	NO
AT5G15350	1.19724	5.92556	2.56654e-14	3.37671e-12	UP	no	NO
AT1G73430	0.719037	5.81618	2.64625e-14	3.46803e-12	UP	no	NO
AT2G29120	-1.46872	2.78077	2.70873e-14	3.53615e-12	DOWN	no	NO
AT4G38230	0.932698	3.66485	2.79002e-14	3.62821e-12	UP	no	NO
AT4G25580	3.31519	5.01042	2.83435e-14	3.67168e-12	UP	no	NO
AT3G07470	1.29065	5.68253	2.84931e-14	3.67692e-12	UP	no	NO
AT1G08890	1.02397	5.19885	2.98939e-14	3.84296e-12	UP	no	NO
AT3G11090	-1.15967	4.22409	3.52819e-14	4.51837e-12	DOWN	no	NO
AT5G47240	2.15005	4.9531	3.79061e-14	4.83604e-12	UP	no	NO
AT2G34357	0.823489	5.16374	3.81248e-14	4.84559e-12	UP	no	NO
AT1G30490	0.849019	5.37251	4.00365e-14	5.06943e-12	UP	no	NO
AT4G03210	2.4973	6.63125	4.27778e-14	5.39625e-12	UP	no	NO
AT4G39070	2.81041	0.443723	4.50899e-14	5.66669e-12	UP	no	NO
AT5G02830	-0.956688	6.06727	4.54062e-14	5.68522e-12	DOWN	no	NO
AT5G65890	-1.14049	4.00509	4.69513e-14	5.85691e-12	DOWN	no	NO
AT5G53010	0.792466	4.73742	4.91445e-14	6.10772e-12	UP	no	NO
AT3G15180	0.901006	4.68104	4.93245e-14	6.10772e-12	UP	no	NO
AT5G39860	-2.49071	2.14455	5.0743e-14	6.26034e-12	DOWN	no	NO
AT5G22650	0.841285	6.59198	5.64052e-14	6.93351e-12	UP	no	YES	5:7535073:C-T;protein_coding;missense;GCT>GTT;A>V,5:7535073:C-T;intronic_variant,5:7535073:C-T;splice_acceptor_region_variant
AT1G73500	1.14351	4.88233	5.71831e-14	7.00358e-12	UP	no	NO
AT1G32240	-1.26755	2.98343	5.85042e-14	7.13942e-12	DOWN	no	NO
AT1G01390	-1.57597	1.99485	5.98403e-14	7.27611e-12	DOWN	no	NO
AT5G54640	-0.957153	4.69849	6.04e-14	7.31774e-12	DOWN	no	NO
AT3G44750	1.21339	4.60439	6.22797e-14	7.51844e-12	UP	no	NO
AT5G27520	1.48509	4.63786	6.41481e-14	7.71633e-12	UP	no	NO
AT1G79810	0.765685	4.74664	6.9033e-14	8.27206e-12	UP	no	NO
AT5G19780	1.07172	6.81514	6.92592e-14	8.27206e-12	UP	no	NO
AT1G53080	2.90346	-0.917174	7.25303e-14	8.63213e-12	UP	no	NO
AT3G15440	2.44126	0.63503	7.29366e-14	8.64992e-12	UP	no	NO
AT1G75230	1.45548	4.23386	7.72957e-14	9.13472e-12	UP	no	NO
AT2G47490	-0.882231	4.9489	7.86859e-14	9.26651e-12	DOWN	no	NO
AT4G26140	0.924843	4.22389	8.29538e-14	9.73507e-12	UP	no	NO
AT1G72430	1.79639	5.50836	8.36947e-14	9.78792e-12	UP	no	NO
AT4G13340	2.05457	6.42096	8.47683e-14	9.87917e-12	UP	no	NO
AT5G05140	0.877917	5.55357	8.52517e-14	9.90125e-12	UP	no	NO
AT3G21890	-2.87446	1.55018	8.76054e-14	1.01396e-11	DOWN	no	NO
AT3G59350	1.25407	4.55467	8.91964e-14	1.02884e-11	UP	no	NO
AT5G25040	-1.0246	4.44317	8.95169e-14	1.02902e-11	DOWN	no	NO
AT3G63110	-2.13801	2.65775	9.63096e-14	1.10333e-11	DOWN	no	NO
AT4G02715	-0.765583	6.85999	9.7984e-14	1.11871e-11	DOWN	no	NO
AT4G10070	0.847243	4.57776	1.04566e-13	1.18982e-11	UP	no	NO
AT3G55430	0.907386	6.06146	1.06383e-13	1.20643e-11	UP	no	YES	3:20551358:C-CA;intronic_variant
AT1G79160	-0.953415	4.96075	1.08825e-13	1.22998e-11	DOWN	no	NO
AT3G15640	0.921358	4.97342	1.15157e-13	1.29719e-11	UP	no	NO
AT3G18600	1.17657	3.76416	1.16613e-13	1.30922e-11	UP	no	NO
AT1G16080	-0.749496	6.55495	1.24014e-13	1.38768e-11	DOWN	no	NO
AT1G23740	-0.913176	8.1074	1.30297e-13	1.45315e-11	DOWN	no	NO
AT3G47570	1.15803	2.95003	1.31653e-13	1.46343e-11	UP	no	YES	3:17530912:G-A;exonic_variant
AT4G02560	0.699875	5.49649	1.32651e-13	1.46968e-11	UP	no	NO
AT2G31902	-2.34505	0.952223	1.64216e-13	1.81343e-11	DOWN	no	NO
AT2G33210	1.12825	4.76785	1.68812e-13	1.85809e-11	UP	no	NO
AT4G29190	-0.987518	6.22629	1.69372e-13	1.85818e-11	DOWN	no	NO
AT2G05100	-0.816413	12.1091	1.76618e-13	1.93138e-11	DOWN	no	YES	2:1824096:CGTACCTGTTACAAGATGAATTTGGTGATTAGACATATCTGAAAAGTTAATGATAGGTTAGGTAAGAGCCAGAGAGAGTGGATTTG-C;intronic_variant&splice_donor_region_variant&splice_acceptor_region_variant&exonic_variant&splice_acceptor_variant&protein_coding
AT3G12810	0.740922	5.84629	1.78787e-13	1.94878e-11	UP	no	NO
AT3G30775	1.86534	4.3317	1.79656e-13	1.95194e-11	UP	no	NO
AT4G24840	0.714559	5.40269	1.80649e-13	1.95532e-11	UP	no	NO
AT1G72645	-1.12859	4.94217	1.81146e-13	1.95532e-11	DOWN	no	NO
AT3G57940	1.15663	3.57891	1.81709e-13	1.95532e-11	UP	no	NO
AT1G10120	1.02899	4.95894	2.07702e-13	2.2279e-11	UP	no	NO
AT1G64440	0.804491	4.79739	2.45104e-13	2.62075e-11	UP	no	NO
AT3G10985	1.08443	6.23791	2.5441e-13	2.71164e-11	UP	no	NO
AT4G17950	0.752854	4.86623	2.68611e-13	2.85397e-11	UP	no	NO
AT1G30470	0.660461	6.32752	2.82206e-13	2.98899e-11	UP	no	NO
AT2G21210	-1.66031	5.2208	2.84388e-13	3.00266e-11	DOWN	no	NO
AT4G30440	0.89625	6.78712	2.92424e-13	3.07785e-11	UP	no	NO
AT1G73490	0.699605	5.53347	3.00932e-13	3.15754e-11	UP	no	NO
AT1G62030	-1.03675	3.66272	3.04815e-13	3.18834e-11	DOWN	no	NO
AT1G69360	0.769192	5.12508	3.08382e-13	3.21567e-11	UP	no	NO
AT5G42760	-2.21099	2.64322	3.22596e-13	3.35351e-11	DOWN	no	NO
AT3G12110	1.23241	3.7697	3.48307e-13	3.60964e-11	UP	no	NO
AT3G15450	1.57987	9.68778	3.5632e-13	3.68135e-11	UP	no	NO
AT4G24780	-1.09519	5.77453	3.64315e-13	3.75244e-11	DOWN	no	NO
AT4G36130	0.703595	6.2335	3.76673e-13	3.86791e-11	UP	no	NO
AT5G08600	1.3569	3.23855	3.86373e-13	3.95545e-11	UP	no	NO
AT4G34030	0.996239	6.92365	3.91154e-13	3.99226e-11	UP	no	NO
AT1G66180	0.843515	7.54144	3.92795e-13	3.9969e-11	UP	no	NO
AT1G65310	2.10906	2.88294	4.02846e-13	4.08682e-11	UP	no	NO
AT2G18860	0.951027	4.31537	4.25082e-13	4.29945e-11	UP	no	NO
AT2G25770	2.56503	0.648259	4.48279e-13	4.5205e-11	UP	no	NO
AT5G44870	-0.755432	4.51539	4.68829e-13	4.71362e-11	DOWN	no	NO
AT5G11200	0.725252	7.02527	6.2895e-13	6.30466e-11	UP	yes	NO
AT4G37910	0.829426	6.04925	6.32375e-13	6.32018e-11	UP	no	NO
AT5G67240	0.761185	5.30934	6.79699e-13	6.77306e-11	UP	no	NO
AT1G69070	0.873724	4.38993	7.09522e-13	7.04938e-11	UP	no	NO
AT2G44940	-1.74024	3.23263	7.3232e-13	7.25449e-11	DOWN	no	NO
AT2G31560	-0.908282	5.1064	7.46666e-13	7.37491e-11	DOWN	no	NO
AT5G01760	1.66984	1.33461	7.95247e-13	7.83178e-11	UP	no	NO
AT4G09350	-1.36166	4.68227	8.05996e-13	7.91451e-11	DOWN	no	NO
AT5G25150	0.731817	5.1024	8.30775e-13	8.1341e-11	UP	no	NO
AT1G71030	-0.939275	7.47198	8.66299e-13	8.45734e-11	DOWN	no	NO
AT2G05070	-0.724941	11.7465	8.69602e-13	8.46505e-11	DOWN	no	NO
AT3G46640	1.45618	2.79091	8.76659e-13	8.50915e-11	UP	no	NO
AT1G77930	-0.731879	6.08649	8.94701e-13	8.65932e-11	DOWN	no	YES	1:29301060:T-G;exonic_variant,1:29301219:T-G;protein_coding;sense;TCT>TCG;S>S,1:29301342:G-C;protein_coding;sense;TCG>TCC;S>S,1:29301094:C-T;exonic_variant,1:29301299:GA-G;exonic_variant&protein_coding,1:29301172:G-T;exonic_variant,1:29301305:A-G;protein_coding;missense;CAG>CGG;Q>R,1:29301274:G-T;protein_coding;missense;GTT>TTT;V>F,1:29301111:GGAATTTGATTTATAT-G;exonic_variant,1:29301175:C-A;exoni…
AT3G57520	1.02934	7.29608	9.3685e-13	9.04127e-11	UP	no	NO
AT4G18760	1.17248	3.86837	9.52225e-13	9.16339e-11	UP	no	YES	4:10307906:C-CT;exonic_variant
AT2G37470	0.776193	5.07971	1.00063e-12	9.60175e-11	UP	no	NO
AT1G16350	0.777739	5.28391	1.00544e-12	9.62055e-11	UP	no	NO
AT2G39250	-1.27484	4.71912	1.01784e-12	9.71154e-11	DOWN	no	NO
AT3G16840	0.695643	5.18235	1.05489e-12	1.00366e-10	UP	no	NO
AT3G56070	0.998494	4.69594	1.07318e-12	1.01819e-10	UP	yes	NO
AT3G21700	-0.956509	3.41169	1.1328e-12	1.07077e-10	DOWN	no	NO
AT3G21010	-1.66152	1.17374	1.13496e-12	1.07077e-10	DOWN	no	NO
AT4G38780	1.46229	1.90163	1.15476e-12	1.08641e-10	UP	yes	NO
AT1G06590	0.870379	3.9263	1.16113e-12	1.08729e-10	UP	no	NO
AT5G19770	0.832417	7.1807	1.16215e-12	1.08729e-10	UP	no	NO
AT5G22100	1.05402	3.1699	1.1985e-12	1.11819e-10	UP	no	NO
AT1G69530	-1.62545	7.55136	1.21136e-12	1.12706e-10	DOWN	no	NO
AT2G43650	0.878359	4.58478	1.22048e-12	1.13242e-10	UP	no	NO
AT2G32150	0.858345	7.86547	1.24246e-12	1.14965e-10	UP	no	NO
AT1G62630	-1.03915	4.3212	1.41293e-12	1.30381e-10	DOWN	no	NO
AT1G23720	2.09546	4.55582	1.4383e-12	1.32359e-10	UP	no	NO
AT5G58770	-1.9251	4.02479	1.45463e-12	1.33497e-10	DOWN	no	NO
AT5G40770	0.786412	5.66172	1.47232e-12	1.34754e-10	UP	no	NO
AT2G25200	1.24918	5.00652	1.47774e-12	1.34883e-10	UP	no	NO
AT1G24170	1.59805	4.85295	1.50803e-12	1.37276e-10	UP	no	NO
AT4G36140	0.777737	5.25478	1.52195e-12	1.38169e-10	UP	no	NO
AT1G37150	-1.9461	0.545037	1.52628e-12	1.38189e-10	DOWN	no	NO
AT4G12320	-1.46681	5.36587	1.55781e-12	1.40593e-10	DOWN	no	NO
AT1G25560	0.90242	7.47758	1.56117e-12	1.40593e-10	UP	no	NO
AT2G04240	-0.943524	4.94562	1.59341e-12	1.43113e-10	DOWN	no	NO
AT1G27400	0.725896	6.67446	1.60229e-12	1.43528e-10	UP	no	NO
AT5G51810	1.34257	2.14276	1.66978e-12	1.49078e-10	UP	no	NO
AT1G30690	0.929088	5.79094	1.67309e-12	1.49078e-10	UP	no	NO
AT5G13700	1.95797	0.207891	1.85767e-12	1.65087e-10	UP	no	NO
AT1G64660	0.925039	7.25358	1.93099e-12	1.71151e-10	UP	no	NO
AT1G02860	0.83357	4.61848	1.94983e-12	1.72368e-10	UP	no	NO
AT2G30070	0.749367	5.21242	1.9636e-12	1.73131e-10	UP	no	NO
AT4G24230	1.32415	6.74482	2.07011e-12	1.82045e-10	UP	no	NO
AT4G13850	0.942437	6.36314	2.23234e-12	1.95801e-10	UP	no	YES	4:8020983:G-A;exonic_variant
AT1G59700	-0.753571	5.57719	2.40393e-12	2.10303e-10	DOWN	no	NO
AT5G20630	1.16093	7.68783	2.50708e-12	2.18759e-10	UP	no	NO
AT1G49040	0.671785	5.89195	2.58477e-12	2.24955e-10	UP	no	NO
AT2G27980	0.655599	5.82915	2.59569e-12	2.25323e-10	UP	no	NO
AT4G37980	-1.19979	6.7489	2.93651e-12	2.54253e-10	DOWN	no	NO
AT3G18130	1.07226	4.71777	2.96443e-12	2.56012e-10	UP	yes	NO
AT2G21320	-1.68558	4.48718	3.02961e-12	2.60973e-10	DOWN	no	NO
AT4G28710	0.777452	5.63427	3.21289e-12	2.76054e-10	UP	no	NO
AT5G54190	1.50632	5.93832	3.2581e-12	2.79226e-10	UP	no	NO
AT2G32930	1.14785	2.97219	3.3512e-12	2.86476e-10	UP	no	NO
AT5G20230	2.35673	4.09669	3.65424e-12	3.11591e-10	UP	no	NO
AT1G03220	0.974544	6.01253	3.8228e-12	3.25141e-10	UP	no	NO
AT3G24530	0.770153	4.17338	3.85469e-12	3.27027e-10	UP	no	NO
AT5G60250	2.65032	0.939988	3.95702e-12	3.34865e-10	UP	no	NO
AT1G20440	1.06938	8.45371	4.02838e-12	3.39468e-10	UP	no	NO
AT1G02475	-0.763118	5.6782	4.03156e-12	3.39468e-10	DOWN	no	NO
AT3G18200	2.48082	1.06141	4.2242e-12	3.54801e-10	UP	no	NO
AT1G08920	1.13515	5.23522	4.38265e-12	3.67194e-10	UP	no	NO
AT3G16240	0.792943	9.82034	4.44519e-12	3.7151e-10	UP	no	NO
AT2G16586	1.05349	5.48248	4.50673e-12	3.75721e-10	UP	no	NO
AT1G51805	-0.702465	6.38338	4.57247e-12	3.8026e-10	DOWN	no	NO
AT1G14930	4.03328	-1.88223	4.75958e-12	3.94846e-10	UP	no	NO
AT3G02880	0.791542	4.9816	5.31914e-12	4.40182e-10	UP	no	NO
AT1G12080	1.70601	4.34055	5.38737e-12	4.44735e-10	UP	no	NO
AT1G12750	0.869495	4.67189	5.49624e-12	4.52613e-10	UP	no	NO
AT2G30575	0.84597	4.02431	5.56624e-12	4.5726e-10	UP	no	NO
AT2G13431	4.10558	-2.12265	5.92118e-12	4.85235e-10	UP	no	NO
AT3G18830	0.99619	5.44653	6.06189e-12	4.9556e-10	UP	no	NO
AT5G63460	0.774074	4.70186	6.47657e-12	5.28178e-10	UP	no	NO
AT3G01500	-0.7773	10.9471	6.73953e-12	5.48295e-10	DOWN	no	YES	3:195336:TCCTGCATTTATCAATACATTTATATTGTTATATATGATCAGCTCATCGATCTAACATGTGTTTGTATA-T;exonic_variant,3:195336:TCCTGCATTTATCAATACATTTATATTGTTATATATGATCAGCTCATCGATCTAACATGTGTTTGTATA-T;intronic_variant&splice_acceptor_region_variant&splice_donor_region_variant&splice_acceptor_variant&splice_donor_variant,3:195336:TCCTGCATTTATCAATACATTTATATTGTTATATATGATCAGCTCATCGATCTAACATGTGTTTGTATA-T;intronic_variant&spl…
AT5G18170	0.985733	6.55349	6.85711e-12	5.5622e-10	UP	no	NO
AT4G08040	3.25186	-0.167697	6.86997e-12	5.5622e-10	UP	no	NO
AT4G16940	-1.69659	1.8887	6.95356e-12	5.61638e-10	DOWN	no	NO
AT2G29360	-0.800728	6.37042	7.02665e-12	5.66184e-10	DOWN	no	NO
AT5G45110	0.76678	4.86378	7.53073e-12	6.05352e-10	UP	no	NO
AT3G09480	1.79427	1.29877	7.60346e-12	6.09744e-10	UP	no	NO
AT3G48360	1.82974	8.12629	7.78943e-12	6.23173e-10	UP	no	NO
AT3G02690	-0.684499	6.13996	7.93868e-12	6.33608e-10	DOWN	no	NO
AT2G01980	0.710543	4.87586	8.03631e-12	6.39884e-10	UP	no	NO
AT2G17080	2.49746	-0.521717	8.0634e-12	6.40527e-10	UP	no	NO
AT2G46780	1.38547	3.31406	8.28271e-12	6.564e-10	UP	no	NO
AT1G05560	-1.59233	5.02626	8.35711e-12	6.60742e-10	DOWN	no	NO
AT1G64880	0.741709	5.20362	8.40173e-12	6.62713e-10	UP	no	NO
AT2G18100	1.51904	2.27135	8.43514e-12	6.63795e-10	UP	no	NO
AT5G49480	-1.58673	4.67954	8.56609e-12	6.72528e-10	DOWN	no	NO
AT2G35940	-0.707712	6.65347	8.84662e-12	6.92937e-10	DOWN	no	NO
AT1G20330	0.79446	6.37912	8.91417e-12	6.96608e-10	UP	no	NO
AT2G47440	1.63031	6.27571	8.96168e-12	6.987e-10	UP	no	NO
AT1G03860	0.792083	5.79228	9.59733e-12	7.4653e-10	UP	no	NO
AT5G15810	0.784878	4.86948	9.75369e-12	7.56945e-10	UP	no	NO
AT1G72450	2.16975	6.94483	9.8967e-12	7.66277e-10	UP	no	NO
AT2G42975	-0.90047	4.58886	9.95155e-12	7.68757e-10	DOWN	no	NO
AT5G44510	-0.690777	5.62577	1.02836e-11	7.92588e-10	DOWN	no	NO
AT2G39530	2.50676	0.663166	1.03234e-11	7.93845e-10	UP	no	NO
AT2G18120	-1.86477	0.730114	1.07359e-11	8.2368e-10	DOWN	no	NO
AT3G11440	1.06037	3.15662	1.09581e-11	8.38567e-10	UP	no	NO
AT1G70420	-1.32391	3.45864	1.09797e-11	8.38567e-10	DOWN	no	NO
AT5G65830	-1.14864	3.49851	1.11854e-11	8.52344e-10	DOWN	no	NO
AT4G25730	0.779234	4.83149	1.16029e-11	8.82161e-10	UP	no	NO
AT2G31751	-1.02982	3.15364	1.16316e-11	8.82348e-10	DOWN	no	NO
AT1G18990	1.89355	1.19292	1.19136e-11	9.01713e-10	UP	no	NO
AT5G52070	-1.0431	3.65477	1.26621e-11	9.56215e-10	DOWN	no	NO
AT4G28900	1.63141	1.98604	1.30278e-11	9.81633e-10	UP	no	YES	4:14259164:T-A;exonic_variant
AT5G67140	-1.0488	3.41792	1.31569e-11	9.89144e-10	DOWN	no	NO
AT4G26690	0.896117	6.01441	1.45687e-11	1.09219e-09	UP	no	NO
AT4G32800	2.191	1.14594	1.45924e-11	1.09219e-09	UP	no	NO
AT1G10640	-1.03812	5.43639	1.47176e-11	1.09912e-09	DOWN	no	NO
AT4G09460	0.942606	4.10993	1.51635e-11	1.12992e-09	UP	no	NO
AT5G35170	-0.637218	8.28416	1.54797e-11	1.15046e-09	DOWN	no	NO
AT1G76160	1.29911	5.87401	1.55076e-11	1.15046e-09	UP	no	NO
AT4G02540	1.15437	5.62288	1.57862e-11	1.16856e-09	UP	no	YES	4:1119060:G-A;protein_coding;missense;GCA>ACA;A>T,4:1119060:G-A;protein_coding;missense;TGC>TAC;C>Y
AT1G25230	0.919229	6.31202	1.59572e-11	1.17863e-09	UP	no	NO
AT5G47700	0.674981	6.70705	1.68861e-11	1.24451e-09	UP	no	NO
AT3G46610	-0.73975	4.77187	1.70023e-11	1.25033e-09	DOWN	no	NO
AT1G62480	1.3395	6.08542	1.71141e-11	1.25581e-09	UP	no	NO
AT4G34630	-1.25671	4.92667	1.72098e-11	1.26009e-09	DOWN	no	NO
AT4G27310	-0.647685	6.37334	1.7593e-11	1.28536e-09	DOWN	no	NO
AT2G37450	-0.727161	5.28939	1.80483e-11	1.31577e-09	DOWN	no	NO
AT3G12140	0.630221	5.49579	1.81772e-11	1.3223e-09	UP	no	NO
AT5G14520	0.741154	5.24998	1.8788e-11	1.36379e-09	UP	no	NO
AT3G04810	0.805728	5.83257	1.92011e-11	1.39078e-09	UP	no	NO
AT3G52740	-1.60828	3.21667	1.98493e-11	1.43464e-09	DOWN	no	NO
AT1G01420	-1.09844	3.41034	2.04284e-11	1.47334e-09	DOWN	no	NO
AT4G18550	1.882	1.52887	2.11419e-11	1.52154e-09	UP	no	NO
AT5G52030	-0.858901	3.9063	2.16771e-11	1.55673e-09	DOWN	no	NO
AT1G69160	-1.0383	5.77759	2.30391e-11	1.65102e-09	DOWN	no	NO
AT4G37250	0.736191	4.75349	2.40436e-11	1.71934e-09	UP	no	NO
AT1G28330	1.09379	7.84893	2.50286e-11	1.78599e-09	UP	no	NO
AT1G63360	-0.729024	4.90614	2.53064e-11	1.802e-09	DOWN	no	YES	1:23498653:C-T;exonic_variant
AT1G27880	1.37314	1.72226	2.54416e-11	1.80781e-09	UP	no	NO
AT5G12980	0.970094	3.58287	2.55516e-11	1.8118e-09	UP	no	NO
AT1G35612	-0.738557	5.4002	2.59071e-11	1.83315e-09	DOWN	no	NO
AT1G02380	1.45014	2.96752	2.60435e-11	1.83893e-09	UP	no	NO
AT3G48140	0.623582	7.59783	2.62399e-11	1.84893e-09	UP	no	NO
AT5G19190	1.22228	7.71256	2.65753e-11	1.86865e-09	UP	no	NO
AT1G03300	1.20667	2.85473	2.79417e-11	1.96063e-09	UP	no	NO
AT5G18620	0.750381	5.25353	2.89591e-11	2.0278e-09	UP	no	NO
AT1G28090	0.687625	4.74848	3.04057e-11	2.12467e-09	UP	no	NO
AT3G12700	1.50865	2.53338	3.08415e-11	2.15067e-09	UP	no	NO
AT5G28262	-1.98597	0.305062	3.25353e-11	2.2641e-09	DOWN	no	NO
AT5G44120	-3.67505	1.68322	3.27939e-11	2.27739e-09	DOWN	no	NO
AT3G28180	1.56436	6.2136	3.3158e-11	2.29793e-09	UP	no	NO
AT4G31060	0.96037	3.46696	3.32415e-11	2.29899e-09	UP	no	NO
AT2G42600	-0.817639	8.55692	3.38211e-11	2.33428e-09	DOWN	no	NO
AT4G02170	3.18066	-0.443301	3.50018e-11	2.41083e-09	UP	no	NO
AT1G06360	0.830132	5.47086	3.65239e-11	2.50819e-09	UP	no	NO
AT1G64500	-1.35779	6.49678	3.65643e-11	2.50819e-09	DOWN	no	NO
AT4G25810	1.82326	3.39003	3.71558e-11	2.54358e-09	UP	no	NO
AT2G37990	0.737286	4.58419	3.90531e-11	2.66805e-09	UP	no	NO
AT3G62570	2.13655	2.97656	4.00351e-11	2.7296e-09	UP	no	NO
AT4G33470	-0.653087	5.16724	4.12542e-11	2.80704e-09	DOWN	no	NO
AT1G52800	-1.93594	0.551021	4.23425e-11	2.87528e-09	DOWN	no	NO
AT2G34060	-1.12781	3.11218	4.29103e-11	2.90797e-09	DOWN	no	NO
AT5G23860	0.779428	5.85703	4.39594e-11	2.97299e-09	UP	no	NO
AT5G48240	0.949835	3.60842	4.40462e-11	2.97299e-09	UP	no	NO
AT3G20000	0.715822	5.64723	4.55812e-11	3.07044e-09	UP	no	NO
AT4G15248	-3.98582	2.0073	4.58049e-11	3.07935e-09	DOWN	no	NO
AT2G43600	3.48628	-1.50083	4.59431e-11	3.08249e-09	UP	no	NO
AT5G66650	1.3721	3.88261	4.61999e-11	3.09355e-09	UP	no	NO
AT2G44790	1.71268	3.58592	4.7346e-11	3.16401e-09	UP	no	NO
AT3G22961	2.92569	1.59374	4.79224e-11	3.19619e-09	UP	no	NO
AT2G31060	0.751488	4.84777	4.88501e-11	3.25162e-09	UP	no	NO
AT5G64310	1.16174	4.31216	4.89593e-11	3.25246e-09	UP	no	NO
AT5G50950	1.33554	5.89797	5.03363e-11	3.33735e-09	UP	no	NO
AT5G56670	0.660795	6.49481	5.10498e-11	3.37801e-09	UP	no	NO
AT4G10925	0.788828	4.33293	5.15875e-11	3.4069e-09	UP	no	NO
AT1G58807	-0.593959	8.03506	5.56808e-11	3.67003e-09	DOWN	no	NO
AT3G59020	0.634254	6.30222	5.98676e-11	3.93829e-09	UP	no	NO
AT2G28120	1.55921	4.67832	6.00192e-11	3.94056e-09	UP	no	NO
AT2G36400	0.905757	5.14545	6.11482e-11	4.00687e-09	UP	no	NO
AT5G05440	1.92033	4.98323	6.18354e-11	4.04403e-09	UP	no	NO
AT3G21030	-2.88674	-0.573595	6.39794e-11	4.17614e-09	DOWN	no	NO
AT4G22350	0.719276	4.37306	6.56731e-11	4.2727e-09	UP	yes	NO
AT5G49740	-1.25949	7.85012	6.57124e-11	4.2727e-09	DOWN	no	NO
AT1G15630	4.37206	-2.27173	6.65062e-11	4.31598e-09	UP	no	NO
AT1G65070	-0.765785	4.88545	6.93606e-11	4.49256e-09	DOWN	no	NO
AT1G27100	0.70955	6.33295	7.11655e-11	4.60063e-09	UP	no	NO
AT3G23750	0.806278	5.89406	7.26959e-11	4.69056e-09	UP	no	NO
AT4G25260	0.938068	5.24413	7.37516e-11	4.74957e-09	UP	no	NO
AT4G08400	2.1815	2.27747	7.46018e-11	4.79349e-09	UP	no	NO
AT5G43760	0.890482	6.03254	7.47246e-11	4.79349e-09	UP	no	NO
AT1G70700	1.93692	7.12039	7.48605e-11	4.79349e-09	UP	no	NO
AT1G73550	2.06291	0.0795157	7.5628e-11	4.83345e-09	UP	no	NO
AT4G37390	1.61242	2.0846	7.9178e-11	5.05075e-09	UP	no	NO
AT1G22882	1.29019	4.64717	8.04144e-11	5.11096e-09	UP	no	NO
AT5G60900	-4.55141	-1.69198	8.04982e-11	5.11096e-09	DOWN	no	NO
AT3G50590	0.650704	6.6721	8.05772e-11	5.11096e-09	UP	no	NO
AT3G59080	1.65593	3.49944	8.10381e-11	5.13054e-09	UP	no	NO
AT3G07650	1.56271	1.60906	8.4639e-11	5.34846e-09	UP	no	NO
AT3G29360	0.63637	6.20357	8.72428e-11	5.50267e-09	UP	no	NO
AT2G38770	0.679618	5.32187	9.06426e-11	5.70641e-09	UP	yes	NO
AT1G51400	-0.620341	9.07263	9.31577e-11	5.851e-09	DOWN	no	NO
AT3G47210	2.12031	0.557703	9.32866e-11	5.851e-09	UP	no	NO
AT4G32020	-0.78824	7.95793	9.48496e-11	5.93797e-09	DOWN	no	NO
AT3G25520	0.683318	8.4161	9.57498e-11	5.98321e-09	UP	no	NO
AT3G44260	1.6238	4.27978	9.75455e-11	6.08413e-09	UP	no	NO
AT5G35910	0.644428	5.13614	9.77277e-11	6.08422e-09	UP	yes	NO
AT5G07380	1.20432	2.39098	9.98591e-11	6.20545e-09	UP	no	NO
AT5G52780	-0.823024	4.74124	1.00358e-10	6.225e-09	DOWN	no	NO
AT4G20890	0.705341	6.04022	1.0102e-10	6.25453e-09	UP	no	NO
AT3G01660	-1.03957	3.22183	1.01294e-10	6.25998e-09	DOWN	no	NO
AT4G31520	1.77544	0.202657	1.02133e-10	6.30029e-09	UP	no	NO
AT5G44010	1.10982	1.80862	1.03253e-10	6.35768e-09	UP	no	NO
AT2G30590	0.751567	4.64968	1.07475e-10	6.6056e-09	UP	no	NO
AT5G53486	-1.58241	1.37022	1.11898e-10	6.86492e-09	DOWN	no	NO
AT5G44340	0.633431	7.54774	1.1471e-10	7.02461e-09	UP	no	NO
AT5G61600	2.1584	4.22746	1.1611e-10	7.09746e-09	UP	no	NO
AT5G09920	-0.657571	5.15402	1.17352e-10	7.16042e-09	DOWN	no	YES	5:3097176:G-A;splice_donor_variant
AT2G33250	-0.690815	5.1379	1.17739e-10	7.17102e-09	DOWN	no	NO
AT5G57550	3.25156	2.32156	1.18443e-10	7.20087e-09	UP	no	NO
AT1G72030	-0.681929	5.29665	1.19805e-10	7.27056e-09	DOWN	no	NO
AT1G15290	0.666233	8.19728	1.23622e-10	7.4887e-09	UP	no	NO
AT1G15260	-0.981149	4.73724	1.24809e-10	7.54701e-09	DOWN	no	NO
AT5G67390	-1.0221	3.92902	1.25637e-10	7.58349e-09	DOWN	no	NO
AT3G61080	-0.600039	5.38333	1.2746e-10	7.67977e-09	DOWN	no	NO
AT3G57930	0.892193	4.5029	1.28636e-10	7.73676e-09	UP	no	NO
AT3G07050	0.734018	4.91842	1.28901e-10	7.73891e-09	UP	no	NO
AT4G18150	3.61746	-1.57618	1.29488e-10	7.7603e-09	UP	no	NO
AT4G34410	4.50985	0.11735	1.4038e-10	8.39809e-09	UP	no	NO
AT5G16370	0.879556	7.00908	1.40875e-10	8.41277e-09	UP	no	NO
AT3G23730	1.80736	5.39853	1.44761e-10	8.62952e-09	UP	no	NO
AT5G50260	1.84636	0.618287	1.45155e-10	8.63774e-09	UP	no	NO
AT3G62550	0.679392	8.21477	1.5152e-10	9.0006e-09	UP	no	NO
AT3G62720	1.50458	4.91402	1.54463e-10	9.15925e-09	UP	no	NO
AT2G45180	0.671541	9.27836	1.55176e-10	9.18332e-09	UP	no	NO
AT3G26520	0.641851	10.4372	1.55414e-10	9.18332e-09	UP	no	NO
AT1G22490	1.56553	1.35973	1.56138e-10	9.20994e-09	UP	no	NO
AT4G17390	0.731342	7.36794	1.57976e-10	9.30207e-09	UP	no	NO
AT4G33760	0.646232	5.47916	1.63278e-10	9.59753e-09	UP	no	NO
AT5G22750	0.835622	3.68913	1.64557e-10	9.6558e-09	UP	no	NO
AT1G17060	1.48454	2.89482	1.70837e-10	1.00069e-08	UP	no	YES	1:5833053:C-CA;exonic_variant,1:5833053:C-CA;intronic_variant,1:5833053:C-CA;exonic_variant&protein_coding
AT3G17700	0.721122	4.37739	1.71159e-10	1.00083e-08	UP	no	NO
AT1G66050	1.32574	1.92637	1.75234e-10	1.02289e-08	UP	no	NO
AT3G47470	-0.588613	13.0543	1.80032e-10	1.04908e-08	DOWN	no	YES	3:17494108:TCCTACCAACAGTTTTGACAATGTGTTAAGTTCTTGAAAGAAGTTATAAATTGTTTTAAGGTCATGTTAATGGTAACTCA-T;intronic_variant&splice_acceptor_region_variant&splice_acceptor_variant&protein_coding,3:17493751:CCCTGCAACAACAACAAAAATGTCTTTTAAGTCTTTTAACTACAACTAGCAGTTTCTTGCATAACAAGAATAGCGGATTAGTCTAAGCTTA-C;intronic_variant&splice_acceptor_region_variant&splice_donor_region_variant&splice_acceptor_variant&splice_donor_…
AT1G44900	0.944898	3.72967	1.80829e-10	1.0519e-08	UP	no	NO
AT4G31000	1.0882	3.71337	1.87825e-10	1.09071e-08	UP	no	NO
AT4G05330	1.00957	3.54377	1.91538e-10	1.11036e-08	UP	no	YES	4:2722525:A-G;intronic_variant
AT5G07300	0.601131	6.01013	1.94018e-10	1.1228e-08	UP	no	NO
AT4G31180	0.581779	6.79999	2.01853e-10	1.16614e-08	UP	no	NO
AT2G46340	-0.619384	7.24676	2.03664e-10	1.17459e-08	DOWN	no	NO
AT1G09575	1.2512	2.72629	2.11191e-10	1.21592e-08	UP	no	NO
AT5G06865	1.22284	4.02142	2.12254e-10	1.21995e-08	UP	no	NO
AT1G55960	-1.00501	7.0051	2.12641e-10	1.2201e-08	DOWN	no	NO
AT4G31405	-1.32398	2.17305	2.1492e-10	1.23107e-08	DOWN	no	NO
AT2G46730	-1.19682	2.54681	2.15393e-10	1.23169e-08	DOWN	no	NO
AT4G09570	0.833124	4.46273	2.20937e-10	1.26125e-08	UP	no	NO
AT1G62250	-0.749211	5.37092	2.26027e-10	1.28608e-08	DOWN	no	NO
AT3G62660	0.733576	5.14997	2.26051e-10	1.28608e-08	UP	no	NO
AT2G41110	0.818705	5.10508	2.29244e-10	1.30205e-08	UP	no	NO
AT1G05180	0.606348	5.15268	2.31369e-10	1.31191e-08	UP	no	NO
AT2G40610	-1.25331	6.32313	2.31999e-10	1.31303e-08	DOWN	no	NO
AT3G04310	-0.986989	2.96895	2.32682e-10	1.31303e-08	DOWN	no	NO
AT2G17250	0.79466	4.00343	2.32737e-10	1.31303e-08	UP	no	YES	2:7499969:G-A;intronic_variant
AT3G27620	2.54824	-0.999697	2.40133e-10	1.35249e-08	UP	no	NO
AT4G35850	0.797036	4.91212	2.43468e-10	1.36899e-08	UP	no	NO
AT1G10140	0.824058	5.12846	2.44453e-10	1.37224e-08	UP	no	NO
AT5G35777	2.53755	4.34975	2.45879e-10	1.37795e-08	UP	no	NO
AT1G31330	-0.577928	11.3963	2.5104e-10	1.40453e-08	DOWN	no	NO
AT5G64260	1.12507	7.30103	2.52315e-10	1.40932e-08	UP	no	NO
AT3G08940	-0.580022	11.4106	2.60121e-10	1.45002e-08	DOWN	no	NO
AT1G27770	0.918324	5.38877	2.60463e-10	1.45002e-08	UP	no	NO
AT2G24520	0.62741	5.06578	2.70302e-10	1.50232e-08	UP	no	YES	2:10415240:CG-C;exonic_variant,2:10418201:C-CCT;splice_acceptor_region_variant,2:10415240:CG-C;exonic_variant&protein_coding
AT5G14610	0.850792	4.26196	2.84018e-10	1.57595e-08	UP	no	NO
AT3G07900	1.87969	0.0355	2.94404e-10	1.63087e-08	UP	no	NO
AT1G24148	-0.829209	5.09021	2.94993e-10	1.63087e-08	DOWN	no	NO
AT2G02130	1.0732	5.39413	2.95369e-10	1.63087e-08	UP	no	NO
AT5G36700	-0.640885	8.42984	2.96527e-10	1.63459e-08	DOWN	no	NO
AT1G66840	-0.886693	4.47135	3.01192e-10	1.65759e-08	DOWN	no	NO
AT1G14980	0.76601	5.67045	3.13164e-10	1.72066e-08	UP	no	NO
AT5G20250	1.95178	8.24078	3.14081e-10	1.72289e-08	UP	no	YES	5:6834092:C-T;protein_coding;missense;TCT>TTT;S>F,5:6834092:C-T;exonic_variant,5:6834092:C-T;intronic_variant
AT3G15354	-0.876528	6.30769	3.15131e-10	1.72584e-08	DOWN	no	NO
AT1G78170	-1.14478	4.43878	3.16658e-10	1.73139e-08	DOWN	no	NO
AT3G57350	0.760673	4.3011	3.1816e-10	1.73678e-08	UP	no	YES	3:21222414:AG-A;splice_acceptor_region_variant
AT2G39630	0.614564	5.28159	3.27351e-10	1.78406e-08	UP	no	NO
AT5G04720	0.973874	5.35266	3.30884e-10	1.8004e-08	UP	no	NO
AT3G04030	-1.43247	2.22023	3.43972e-10	1.8686e-08	DOWN	no	NO
AT2G33990	0.771797	4.46106	3.44946e-10	1.87088e-08	UP	no	NO
AT3G05900	0.736784	6.51186	3.5254e-10	1.90899e-08	UP	no	NO
AT3G47680	-0.68177	4.9024	3.61386e-10	1.95375e-08	DOWN	no	NO
AT4G32980	-0.738656	5.73658	3.68882e-10	1.99108e-08	DOWN	no	NO
AT5G24150	-1.66653	5.49136	3.84364e-10	2.07132e-08	DOWN	no	NO
AT4G15610	0.862692	4.92033	3.97487e-10	2.13862e-08	UP	no	NO
AT4G01330	0.695011	6.57952	4.11429e-10	2.20686e-08	UP	no	NO
AT1G80930	0.582129	6.62921	4.11481e-10	2.20686e-08	UP	yes	NO
AT4G38830	2.16636	-0.878671	4.12311e-10	2.20779e-08	UP	no	NO
AT1G35670	0.733418	5.09767	4.23233e-10	2.26268e-08	UP	no	NO
AT5G20020	0.703675	6.38081	4.24878e-10	2.26788e-08	UP	no	NO
AT3G54470	0.703417	5.1545	4.26252e-10	2.27161e-08	UP	no	NO
AT5G14880	-0.61146	6.00882	4.27246e-10	2.27331e-08	DOWN	no	NO
AT5G26270	1.32768	2.88	4.30311e-10	2.28601e-08	UP	no	YES	5:9207967:A-AT;splice_acceptor_region_variant
AT1G22360	0.934353	5.26035	4.38072e-10	2.32358e-08	UP	no	NO
AT5G56030	0.703394	7.03461	4.49242e-10	2.37907e-08	UP	no	NO
AT2G34430	0.768002	10.9332	4.50392e-10	2.38142e-08	UP	no	NO
AT1G03130	-0.587762	9.89442	4.54409e-10	2.39889e-08	DOWN	no	NO
AT5G02100	0.950277	4.04184	4.64165e-10	2.44656e-08	UP	no	NO
AT5G59550	0.764471	4.20874	4.67574e-10	2.45906e-08	UP	no	NO
AT5G44780	1.19632	2.08548	4.67996e-10	2.45906e-08	UP	no	NO
AT2G43700	-1.26113	2.31746	4.74384e-10	2.4853e-08	DOWN	no	NO
AT5G13320	-2.28957	0.295665	4.74465e-10	2.4853e-08	DOWN	no	YES	5:4269156:G-A;protein_coding;sense;TCG>TCA;S>S,5:4269156:G-A;exonic_variant
AT5G52320	2.4111	1.09076	4.86322e-10	2.54345e-08	UP	no	NO
AT2G40360	0.695346	5.53192	4.89843e-10	2.55718e-08	UP	no	NO
AT1G48100	-1.4214	4.34216	4.90466e-10	2.55718e-08	DOWN	no	NO
AT2G35710	1.5968	1.2875	4.91359e-10	2.55788e-08	UP	no	NO
AT1G10290	0.603697	6.43381	5.00529e-10	2.60159e-08	UP	no	NO
AT3G05040	0.674138	4.52394	5.08086e-10	2.6368e-08	UP	no	NO
AT3G10150	-1.98975	1.04786	5.09416e-10	2.63964e-08	DOWN	no	NO
AT2G36500	-1.51956	0.762739	5.10947e-10	2.6435e-08	DOWN	no	NO
AT1G36060	1.83517	4.70341	5.15628e-10	2.66363e-08	UP	no	NO
AT1G10920	-0.814017	3.68197	5.21636e-10	2.69054e-08	DOWN	no	NO
AT5G12020	3.76653	0.460405	5.31126e-10	2.7353e-08	UP	no	NO
AT3G60530	0.805556	7.30162	5.38181e-10	2.7674e-08	UP	no	NO
AT2G46735	-0.964695	3.7799	5.44624e-10	2.79626e-08	DOWN	no	NO
AT5G66130	0.95952	2.71002	5.51426e-10	2.82688e-08	UP	no	NO
AT2G18440	0.609352	8.25227	5.52603e-10	2.82861e-08	UP	no	NO
AT1G06560	0.859335	3.74196	5.66777e-10	2.89676e-08	UP	no	NO
AT2G38530	1.48651	8.06397	5.81063e-10	2.96527e-08	UP	no	NO
AT1G61890	1.05133	5.67574	5.85556e-10	2.98039e-08	UP	no	NO
AT1G27360	0.872462	4.09434	5.85797e-10	2.98039e-08	UP	no	NO
AT2G29165	-1.79339	-0.170422	5.91717e-10	3.00598e-08	DOWN	no	NO
AT4G00880	-0.936861	4.7788	5.94489e-10	3.01551e-08	DOWN	no	NO
AT3G07540	1.13095	3.86756	6.06066e-10	3.06961e-08	UP	no	NO
AT5G43890	2.2839	-0.285748	6.1474e-10	3.10887e-08	UP	no	NO
AT1G62440	2.73119	1.8163	6.26446e-10	3.16332e-08	UP	no	NO
AT1G55330	0.924201	5.70136	6.36531e-10	3.20943e-08	UP	no	NO
AT4G01950	1.35541	5.36514	6.38294e-10	3.21351e-08	UP	no	NO
AT5G26740	0.730812	5.07733	6.40369e-10	3.21704e-08	UP	no	NO
AT2G20490	0.707664	4.76825	6.40906e-10	3.21704e-08	UP	no	NO
AT3G54890	-0.569496	12.5819	6.49131e-10	3.25348e-08	DOWN	no	YES	3:20339847:CCCTGTTACACCCACCAAGCAAAAAACACCAACATTAGATATACATTTGTACATAAGTTTGATCAAGAAAGGTAAGTTGTTGTGTGTGCTTA-C;intronic_variant&splice_acceptor_region_variant&splice_donor_region_variant&splice_acceptor_variant&splice_donor_variant,3:20339847:CCCTGTTACACCCACCAAGCAAAAAACACCAACATTAGATATACATTTGTACATAAGTTTGATCAAGAAAGGTAAGTTGTTGTGTGTGCTTA-C;intronic_variant&splice_acceptor_region_variant&splice_donor_regio…
AT1G13080	-1.07671	5.90404	6.5173e-10	3.26165e-08	DOWN	no	NO
AT3G57450	0.988713	4.08403	6.65462e-10	3.32127e-08	UP	no	NO
AT1G17345	2.4364	-0.0397528	6.65615e-10	3.32127e-08	UP	no	NO
AT4G37320	-0.798343	3.69544	6.73546e-10	3.35587e-08	DOWN	no	NO
AT2G14050	-1.26028	2.07302	6.79069e-10	3.37839e-08	DOWN	no	YES	2:5913947:A-AG;exonic_variant,2:5913947:A-AG;exonic_variant&protein_coding
AT1G69610	-1.06244	3.56105	6.96537e-10	3.46019e-08	DOWN	no	NO
AT2G38870	-1.05188	3.77736	6.98005e-10	3.46237e-08	DOWN	no	NO
AT2G36410	0.769165	5.37273	7.03086e-10	3.47787e-08	UP	no	NO
AT3G29776	-1.13407	1.99573	7.03286e-10	3.47787e-08	DOWN	no	NO
AT2G32440	-0.713871	5.1627	7.04227e-10	3.47787e-08	DOWN	no	NO
AT2G26780	0.606171	6.06871	7.06651e-10	3.48473e-08	UP	no	YES	2:11416609:G-A;exonic_variant,2:11416609:G-A;protein_coding;missense;GAA>AAA;E>K
AT1G08930	1.89889	5.9641	7.1368e-10	3.51425e-08	UP	no	NO
AT2G06850	1.46103	7.65516	7.15715e-10	3.51912e-08	UP	no	NO
AT5G13870	1.07962	3.56263	7.18832e-10	3.5293e-08	UP	no	NO
AT4G26600	1.0616	3.01845	7.37033e-10	3.61339e-08	UP	no	NO
AT5G58090	0.718737	4.80584	7.63432e-10	3.73738e-08	UP	no	NO
AT5G45750	0.895441	4.59695	8.03101e-10	3.92587e-08	UP	no	NO
AT5G36940	-0.648072	4.76745	8.0491e-10	3.92901e-08	DOWN	no	NO
AT1G15200	0.599694	6.20916	8.13873e-10	3.96701e-08	UP	no	NO
AT5G52120	1.10937	3.79967	8.17465e-10	3.97876e-08	UP	no	NO
AT3G55110	-1.12616	2.99842	8.20043e-10	3.98555e-08	DOWN	no	NO
AT5G06870	1.71208	5.79368	8.25101e-10	4.00435e-08	UP	no	NO
AT2G36830	0.821913	6.99321	8.31553e-10	4.02986e-08	UP	no	NO
AT5G63250	3.83104	-1.39723	8.46391e-10	4.09588e-08	UP	no	NO
AT3G18490	-0.668742	8.28115	8.57067e-10	4.14159e-08	DOWN	no	NO
AT5G51390	1.10732	2.95258	8.73215e-10	4.21358e-08	UP	no	NO
AT2G40290	0.609139	5.62973	8.79115e-10	4.23597e-08	UP	no	NO
AT1G67265	2.05735	1.46349	9.01882e-10	4.33947e-08	UP	no	NO
AT1G45191	-1.20645	2.84469	9.09621e-10	4.37046e-08	DOWN	no	NO
AT3G49790	0.995351	6.30125	9.47878e-10	4.54779e-08	UP	no	NO
AT3G10060	-0.735572	6.4741	9.77428e-10	4.6829e-08	DOWN	no	NO
AT2G32610	2.26486	-0.649187	9.8896e-10	4.73141e-08	UP	no	NO
AT1G79320	1.52682	0.632173	1.00147e-09	4.78446e-08	UP	no	NO
AT1G02650	1.42049	0.64678	1.00763e-09	4.8071e-08	UP	no	NO
AT3G56400	1.25601	4.37047	1.02493e-09	4.87664e-08	UP	no	NO
AT1G80410	0.551303	6.84723	1.02511e-09	4.87664e-08	UP	no	NO
AT4G09750	-0.723095	4.60757	1.03443e-09	4.91406e-08	DOWN	no	NO
AT4G22200	-0.960188	5.85205	1.05492e-09	5.00433e-08	DOWN	no	YES	4:11750324:CA-C;exonic_variant,4:11750341:AT-A;exonic_variant,4:11750338:T-G;exonic_variant,4:11750318:A-G;exonic_variant,4:11750311:AC-A;exonic_variant,4:11750346:A-G;exonic_variant
AT5G25630	-0.653176	7.21878	1.05895e-09	5.0164e-08	DOWN	no	NO
AT2G27500	0.789471	5.21625	1.06676e-09	5.04627e-08	UP	no	NO
AT1G01120	0.940119	5.30883	1.08826e-09	5.14075e-08	UP	no	NO
AT3G54530	6.73935	-1.81939	1.10288e-09	5.20253e-08	UP	no	NO
AT3G03960	0.607796	6.11902	1.11098e-09	5.23342e-08	UP	no	NO
AT5G14120	1.47842	7.32645	1.11357e-09	5.23827e-08	UP	no	NO
AT4G18440	1.0746	5.4864	1.11979e-09	5.26022e-08	UP	no	NO
AT3G59400	-0.876402	7.82926	1.12448e-09	5.27489e-08	DOWN	no	NO
AT4G15080	0.699411	4.95159	1.14523e-09	5.36473e-08	UP	no	YES	4:8612440:G-A;exonic_variant
AT5G54270	-0.564812	12.7417	1.16019e-09	5.42727e-08	DOWN	no	YES	5:22038548:TGGTCTGTTTTCTTTTTGGTCTTAATCTCGTCATATTAAAGGTGTTTCATCTTTCTTCTTGAGTTTGTGTCTGACTTTCACGTAAAATGTCTATGTGAA-T;intronic_variant&splice_acceptor_region_variant&splice_donor_region_variant&splice_acceptor_variant&splice_donor_variant&protein_coding,5:22038807:GAGGTTAGTCTCTAAATCTCACTCACTCAATGTAAAAACAGAGTAAATAACTAATCATCATTTGC-G;intronic_variant&splice_acceptor_region_variant&splice_donor_region_var…
AT3G50790	-0.728961	5.1801	1.17729e-09	5.49964e-08	DOWN	no	NO
AT5G03230	-1.15045	5.99357	1.18056e-09	5.50725e-08	DOWN	no	NO
AT3G27690	-0.742212	9.98778	1.18604e-09	5.52221e-08	DOWN	no	NO
AT2G25850	-0.708006	4.81577	1.18704e-09	5.52221e-08	DOWN	no	NO
AT5G51430	0.601511	5.7259	1.22046e-09	5.66985e-08	UP	no	NO
AT3G10640	0.68796	4.50651	1.22373e-09	5.67718e-08	UP	no	NO
AT3G56160	-0.58331	5.61192	1.22749e-09	5.68679e-08	DOWN	no	NO
AT5G61020	0.628665	6.08711	1.24033e-09	5.73839e-08	UP	no	NO
AT3G21150	-2.97785	1.95746	1.27632e-09	5.8968e-08	DOWN	no	NO
AT4G00050	-0.79502	5.34055	1.28657e-09	5.93602e-08	DOWN	no	NO
AT4G03190	0.845752	4.98709	1.31319e-09	6.05056e-08	UP	no	NO
AT3G06680	0.778732	4.35228	1.35876e-09	6.25198e-08	UP	no	NO
AT3G59290	0.712038	4.82088	1.37432e-09	6.31495e-08	UP	no	NO
AT4G29070	-0.6802	5.83881	1.41357e-09	6.4837e-08	DOWN	no	NO
AT2G31790	-0.638885	5.81313	1.4149e-09	6.4837e-08	DOWN	no	NO
AT3G05180	-0.661023	5.04071	1.4264e-09	6.52751e-08	DOWN	no	NO
AT1G26220	-0.745982	4.46576	1.45209e-09	6.63605e-08	DOWN	no	NO
AT2G46880	-7.92019	2.22041	1.4636e-09	6.67962e-08	DOWN	no	NO
AT5G54280	0.643842	6.18069	1.47343e-09	6.71536e-08	UP	no	NO
AT5G23700	2.33761	-0.171167	1.52589e-09	6.94509e-08	UP	no	NO
AT5G11000	0.695643	4.13122	1.55651e-09	7.07486e-08	UP	no	NO
AT5G20740	1.05203	2.6535	1.56161e-09	7.08274e-08	UP	no	NO
AT1G44910	0.62312	5.33353	1.56245e-09	7.08274e-08	UP	yes	YES	1:16977617:C-CTT;intronic_variant
AT4G40020	2.9944	-1.12376	1.56716e-09	7.09456e-08	UP	no	NO
AT3G19670	0.588028	5.62731	1.56946e-09	7.09542e-08	UP	yes	NO
AT5G54075	1.19825	1.79053	1.58501e-09	7.15611e-08	UP	no	NO
AT5G66200	0.909032	5.43973	1.58741e-09	7.15735e-08	UP	no	NO
AT5G55920	0.842789	4.12149	1.59212e-09	7.16902e-08	UP	no	NO
AT1G11720	-0.631347	6.34978	1.62307e-09	7.29861e-08	DOWN	no	NO
AT4G01995	-0.615646	5.11775	1.6257e-09	7.3007e-08	DOWN	no	NO
AT4G28240	-0.930259	6.42766	1.63194e-09	7.31895e-08	DOWN	no	NO
AT1G24706	0.55388	6.2576	1.66598e-09	7.45198e-08	UP	yes	NO
AT5G19340	1.46879	3.87235	1.66603e-09	7.45198e-08	UP	no	NO
AT1G12450	0.950659	3.52846	1.7335e-09	7.74351e-08	UP	no	NO
AT1G53885	2.57576	4.98223	1.8249e-09	8.14099e-08	UP	no	NO
AT1G70430	1.08107	2.41793	1.87217e-09	8.3408e-08	UP	no	NO
AT2G18600	1.34707	1.76071	1.87525e-09	8.3435e-08	UP	no	YES	2:8074275:T-TG;intronic_variant
AT2G44950	0.591618	5.50156	1.93209e-09	8.58505e-08	UP	no	NO
AT1G57990	1.86862	5.40653	1.95714e-09	8.68493e-08	UP	no	NO
AT3G14090	0.797617	4.40588	1.97115e-09	8.73555e-08	UP	no	NO
AT3G53990	0.788389	6.88753	1.99543e-09	8.83154e-08	UP	no	NO
AT3G14120	0.672443	4.7673	2.00179e-09	8.84809e-08	UP	no	NO
AT5G45340	1.73592	2.28309	2.01061e-09	8.8754e-08	UP	no	NO
AT1G68580	0.704573	5.80085	2.02679e-09	8.93248e-08	UP	no	NO
AT1G01240	-0.634456	6.06459	2.02884e-09	8.93248e-08	DOWN	no	NO
AT2G37620	0.762635	4.34774	2.05458e-09	9.03397e-08	UP	no	NO
AT3G05060	0.733611	4.8731	2.05822e-09	9.03819e-08	UP	no	NO
AT1G80270	1.0345	3.28776	2.09024e-09	9.16683e-08	UP	no	NO
AT5G02560	-0.827883	3.75184	2.13281e-09	9.34137e-08	DOWN	no	NO
AT1G29720	-1.89811	3.22163	2.14254e-09	9.37181e-08	DOWN	no	NO
AT3G18000	1.12783	6.1793	2.16859e-09	9.47346e-08	UP	no	NO
AT2G13410	3.92269	-2.28484	2.18048e-09	9.51306e-08	UP	no	NO
AT1G10550	4.31509	1.80097	2.19455e-09	9.56204e-08	UP	no	NO
AT5G67030	-0.599166	9.43767	2.1982e-09	9.56556e-08	DOWN	no	NO
AT1G42440	0.614417	5.11317	2.20789e-09	9.5867e-08	UP	no	NO
AT2G32290	-1.61722	2.27569	2.20875e-09	9.5867e-08	DOWN	no	NO
AT4G37220	1.426	2.75674	2.24667e-09	9.73876e-08	UP	no	NO
AT1G03230	0.761517	4.47801	2.27615e-09	9.85384e-08	UP	no	NO
AT1G21590	-0.758053	6.55479	2.27979e-09	9.85694e-08	DOWN	no	NO
AT3G57530	0.672794	5.97201	2.31811e-09	1.00098e-07	UP	no	NO
AT1G68370	0.565915	5.42713	2.32827e-09	1.00408e-07	UP	no	NO
AT1G13160	0.672194	4.30895	2.3541e-09	1.01392e-07	UP	no	NO
AT2G42870	1.13569	4.89226	2.36576e-09	1.01764e-07	UP	no	NO
AT5G66190	-0.555611	9.79343	2.38584e-09	1.02497e-07	DOWN	no	NO
AT1G77280	-0.932432	3.77394	2.46669e-09	1.0581e-07	DOWN	no	NO
AT4G03110	0.748365	5.28027	2.46926e-09	1.0581e-07	UP	no	NO
AT3G14520	3.83238	-2.65292	2.48758e-09	1.0646e-07	UP	no	NO
AT4G24450	-1.6483	4.32228	2.51907e-09	1.07577e-07	DOWN	no	NO
AT3G07460	0.929203	5.89525	2.52005e-09	1.07577e-07	UP	no	NO
AT2G46080	-0.61191	5.04408	2.56346e-09	1.09291e-07	DOWN	no	NO
AT3G44020	-0.750838	4.30587	2.60639e-09	1.10954e-07	DOWN	no	NO
AT1G56580	0.700641	6.52813	2.60905e-09	1.10954e-07	UP	no	NO
AT5G23050	0.833927	5.57317	2.64438e-09	1.12315e-07	UP	no	NO
AT3G16810	0.849243	3.94244	2.67994e-09	1.13681e-07	UP	no	NO
AT3G50060	1.86803	4.37454	2.70353e-09	1.14538e-07	UP	no	NO
AT4G34550	-3.04261	0.56438	2.78412e-09	1.17804e-07	DOWN	no	NO
AT5G45470	-0.745878	4.51091	2.7957e-09	1.18146e-07	DOWN	no	NO
AT1G30160	2.06144	-0.494008	2.81628e-09	1.18866e-07	UP	no	NO
AT5G57630	0.847534	5.08571	2.84403e-09	1.19887e-07	UP	no	NO
AT3G21370	-3.5806	1.72736	2.86104e-09	1.20453e-07	DOWN	no	NO
AT3G20670	0.781218	4.75736	2.86738e-09	1.20569e-07	UP	no	NO
AT3G28160	0.796951	4.42767	2.87927e-09	1.20919e-07	UP	no	YES	3:10496355:C-A;exonic_variant
AT3G60980	0.724976	4.14779	2.90555e-09	1.2187e-07	UP	no	NO
AT2G45135	-3.31565	0.2393	2.92984e-09	1.22734e-07	DOWN	no	NO
AT1G48330	-1.08802	2.37547	2.9365e-09	1.22734e-07	DOWN	no	NO
AT3G28740	-1.68941	5.2857	2.93708e-09	1.22734e-07	DOWN	no	NO
AT1G79110	-0.946549	3.38694	3.00122e-09	1.25259e-07	DOWN	no	NO
AT4G36500	1.00233	4.17407	3.01233e-09	1.25567e-07	UP	no	NO
AT1G52343	1.50544	0.345782	3.02617e-09	1.25839e-07	UP	no	NO
AT1G50130	3.62202	-2.42478	3.02796e-09	1.25839e-07	UP	no	NO
AT2G18260	1.00205	3.01701	3.03007e-09	1.25839e-07	UP	no	NO
AT2G45560	-0.721343	5.38192	3.14004e-09	1.30246e-07	DOWN	no	NO
AT5G06320	0.887092	5.24132	3.1695e-09	1.31306e-07	UP	no	NO
AT4G02060	0.855049	3.9594	3.18424e-09	1.31755e-07	UP	no	NO
AT3G29670	1.23743	2.84084	3.21753e-09	1.32969e-07	UP	no	NO
AT4G36470	-1.02232	2.77931	3.2239e-09	1.33069e-07	DOWN	no	NO
AT2G41430	0.668431	9.43268	3.25801e-09	1.34312e-07	UP	no	NO
AT1G69250	0.640421	4.40516	3.26814e-09	1.34565e-07	UP	no	NO
AT5G03355	2.62752	1.44871	3.30688e-09	1.35994e-07	UP	no	NO
AT3G59820	0.751019	4.30131	3.3308e-09	1.36811e-07	UP	no	NO
AT5G60670	0.735958	5.30769	3.36348e-09	1.37985e-07	UP	no	NO
AT1G73170	-0.56883	6.48458	3.50818e-09	1.43746e-07	DOWN	no	NO
AT3G57260	-4.53676	0.464806	3.57281e-09	1.46216e-07	DOWN	no	NO
AT1G64390	-0.994724	5.65355	3.58914e-09	1.46706e-07	DOWN	no	NO
AT2G36480	0.583471	4.83337	3.66773e-09	1.49737e-07	UP	no	NO
AT5G64040	-0.561362	10.7092	3.68584e-09	1.50294e-07	DOWN	no	YES	5:25628813:TCTGCAAAACAGAAAACGAACAAGAACATCACAATCTCTTCAAGTTAAATATTATTCCCAAAGAAAAGAAAACGTTGTGGATATTAGACAAAC-T;intronic_variant&splice_acceptor_region_variant&splice_donor_region_variant&splice_donor_variant,5:25629030:TCCTATAATCAAAATTTCAAAAAATCCAAAACTTTTTAGGATCTTTAGCAATGTCAAGATTGAGGCATTCAAAGACTTA-T;intronic_variant&splice_acceptor_region_variant&splice_donor_region_variant&splice_acceptor_variant&sp…
AT2G47310	0.821521	3.46115	3.86836e-09	1.57546e-07	UP	no	NO
AT3G15000	0.682428	6.59604	3.9028e-09	1.587e-07	UP	no	NO
AT3G19680	2.78092	6.4895	3.90612e-09	1.587e-07	UP	no	NO
AT5G24380	-0.922807	5.57133	3.97999e-09	1.61506e-07	DOWN	no	NO
AT1G55900	0.769253	3.63974	3.99227e-09	1.61622e-07	UP	no	NO
AT1G50090	3.82532	-2.31629	3.99246e-09	1.61622e-07	UP	no	NO
AT5G65660	0.732379	6.00604	3.99945e-09	1.61711e-07	UP	no	NO
AT1G63660	0.809106	4.83807	4.07037e-09	1.64189e-07	UP	no	NO
AT3G22530	-0.704317	4.31488	4.07047e-09	1.64189e-07	DOWN	no	NO
AT4G16010	2.99603	-2.2651	4.12452e-09	1.6617e-07	UP	no	NO
AT4G02420	-1.11048	3.12453	4.16581e-09	1.67633e-07	DOWN	no	NO
AT5G40900	2.63293	0.380249	4.18334e-09	1.68137e-07	UP	no	NO
AT2G20450	0.665032	5.29259	4.19768e-09	1.68513e-07	UP	no	NO
AT1G23030	1.373	4.92765	4.2827e-09	1.71721e-07	UP	no	NO
AT5G56860	-0.788601	5.03206	4.53334e-09	1.81555e-07	DOWN	no	NO
AT1G65230	-0.651836	6.63419	4.54797e-09	1.81638e-07	DOWN	no	NO
AT5G15140	3.9591	-2.47599	4.55043e-09	1.81638e-07	UP	no	NO
AT5G10930	-2.13876	5.30195	4.5516e-09	1.81638e-07	DOWN	no	NO
AT4G16857	1.06037	3.33444	4.58991e-09	1.8295e-07	UP	no	NO
AT5G15210	-0.816892	4.48139	4.6351e-09	1.84533e-07	DOWN	no	NO
AT2G41220	0.676315	6.28865	4.66305e-09	1.85426e-07	UP	no	NO
AT2G41900	-0.635826	6.74483	4.66895e-09	1.85442e-07	DOWN	no	NO
AT3G51800	0.638828	6.20967	4.71841e-09	1.87186e-07	UP	no	YES	3:19213246:G-GA;intronic_variant
AT3G05890	1.33503	3.80515	4.82073e-09	1.90897e-07	UP	no	NO
AT4G10480	0.617185	6.45127	4.82328e-09	1.90897e-07	UP	no	NO
AT3G01160	0.743392	4.11922	4.93868e-09	1.95235e-07	UP	no	NO
AT5G47370	0.744821	5.59976	4.95336e-09	1.95546e-07	UP	no	NO
AT1G56630	2.02652	-0.184764	4.95816e-09	1.95546e-07	UP	no	NO
AT5G65683	-0.937035	3.56497	5.00063e-09	1.96858e-07	DOWN	no	YES	5:26264120:C-T;exonic_variant
AT5G38150	-0.86064	4.62801	5.00414e-09	1.96858e-07	DOWN	no	NO
AT2G20585	0.892868	2.821	5.00898e-09	1.96858e-07	UP	no	NO
AT3G60080	-0.761573	4.29334	5.06692e-09	1.98903e-07	DOWN	no	NO
AT2G29550	0.734013	6.13791	5.08615e-09	1.99426e-07	UP	no	NO
AT5G61620	5.0063	-2.83255	5.12852e-09	2.00853e-07	UP	no	NO
AT3G06070	1.30729	5.84659	5.1535e-09	2.01597e-07	UP	no	NO
AT3G10420	-0.695213	6.94031	5.1643e-09	2.01785e-07	DOWN	no	NO
AT5G56680	0.612505	5.63173	5.17157e-09	2.01835e-07	UP	no	NO
AT1G74060	0.549146	6.94159	5.23929e-09	2.04242e-07	UP	no	NO
AT1G50055	-1.06951	2.13366	5.28282e-09	2.057e-07	DOWN	no	NO
AT3G25500	0.729817	5.47513	5.29924e-09	2.05748e-07	UP	no	NO
AT5G61270	-0.747721	5.11999	5.29987e-09	2.05748e-07	DOWN	no	NO
AT1G48635	0.602247	5.04088	5.30445e-09	2.05748e-07	UP	no	NO
AT5G55620	-0.742582	5.33616	5.30849e-09	2.05748e-07	DOWN	no	NO
AT1G05562	-0.986821	3.81896	5.32891e-09	2.06166e-07	DOWN	no	NO
AT2G41250	-0.933292	6.97842	5.33151e-09	2.06166e-07	DOWN	no	NO
AT5G24280	1.17313	3.28071	5.34838e-09	2.06581e-07	UP	no	NO
AT5G46090	2.11838	-1.0867	5.39966e-09	2.08302e-07	UP	no	NO
AT3G09820	0.595049	7.1633	5.40531e-09	2.08302e-07	UP	no	NO
AT3G54870	1.52465	0.909358	5.46357e-09	2.10307e-07	UP	no	NO
AT1G52750	1.69045	2.38312	5.49618e-09	2.11321e-07	UP	no	NO
AT3G30460	-2.82111	-0.236855	5.50275e-09	2.11332e-07	DOWN	no	NO
AT5G20140	-0.624799	5.71636	5.55205e-09	2.12983e-07	DOWN	no	NO
AT3G46780	-0.541511	9.81019	5.56442e-09	2.13214e-07	DOWN	no	NO
AT3G06700	0.615614	6.80891	5.65891e-09	2.16588e-07	UP	no	NO
AT1G08830	1.66799	5.80338	5.66577e-09	2.16605e-07	UP	no	NO
AT4G03410	-0.744695	4.41077	5.69983e-09	2.1766e-07	DOWN	no	NO
AT3G11830	0.593948	6.45149	5.70913e-09	2.17768e-07	UP	no	NO
AT3G12340	0.930056	3.08392	5.72075e-09	2.17965e-07	UP	no	NO
AT3G55750	0.623774	6.45341	5.72873e-09	2.18022e-07	UP	no	NO
AT1G76590	0.883648	4.35775	5.84022e-09	2.22014e-07	UP	no	NO
AT5G09710	1.70634	0.243674	5.86782e-09	2.22812e-07	UP	no	NO
AT4G32590	-0.589293	5.59981	5.88469e-09	2.23126e-07	DOWN	no	NO
AT1G79410	-1.35215	2.47288	5.88935e-09	2.23126e-07	DOWN	no	NO
AT2G47790	0.704752	4.29932	5.9902e-09	2.26692e-07	UP	no	NO
AT3G08505	-1.04214	3.17329	6.0553e-09	2.28898e-07	DOWN	no	NO
AT4G02770	-0.519954	10.795	6.10062e-09	2.30353e-07	DOWN	no	NO
AT1G29670	0.674443	6.46239	6.1336e-09	2.31339e-07	UP	no	NO
AT1G12000	0.674988	5.75903	6.17673e-09	2.32705e-07	UP	no	NO
AT1G03090	1.20743	7.35262	6.29472e-09	2.36885e-07	UP	no	NO
AT2G18220	0.82857	3.6155	6.36828e-09	2.39386e-07	UP	no	NO
AT5G46270	-0.616954	4.6932	6.3884e-09	2.39875e-07	DOWN	no	NO
AT5G17490	1.38465	2.78376	6.47173e-09	2.42733e-07	UP	no	NO
AT1G72890	-0.98351	3.52029	6.48367e-09	2.4291e-07	DOWN	no	NO
AT1G32950	1.83152	-0.37217	6.64877e-09	2.48819e-07	UP	no	NO
AT4G24275	1.48466	3.82709	6.71678e-09	2.51085e-07	UP	no	NO
AT3G49010	0.635658	7.24955	6.80193e-09	2.53986e-07	UP	no	NO
AT5G19810	4.39064	-2.77082	6.82149e-09	2.54435e-07	UP	no	YES	5:6693246:A-C;protein_coding;sense;CCA>CCC;P>P
AT1G48920	0.615619	7.52315	6.86509e-09	2.55778e-07	UP	no	NO
AT1G76650	2.18658	1.93155	6.96049e-09	2.58778e-07	UP	no	NO
AT3G07340	0.951796	3.10408	6.96099e-09	2.58778e-07	UP	no	NO
AT2G35470	1.0068	3.81814	7.04524e-09	2.61621e-07	UP	no	NO
AT5G38520	-0.654674	7.33334	7.05332e-09	2.61633e-07	DOWN	no	NO
AT5G16960	-4.74383	-0.607993	7.09729e-09	2.62975e-07	DOWN	no	NO
AT1G04730	1.10001	2.59443	7.2128e-09	2.66961e-07	UP	no	NO
AT4G13820	1.60758	0.585391	7.31958e-09	2.70616e-07	UP	no	NO
AT1G54350	-0.534543	6.37808	7.3475e-09	2.71191e-07	DOWN	no	NO
AT3G59670	0.835421	3.36227	7.35161e-09	2.71191e-07	UP	no	NO
AT1G13590	1.65234	0.859783	7.35929e-09	2.71191e-07	UP	no	NO
AT5G11720	0.578218	6.12696	7.39497e-09	2.72208e-07	UP	no	YES	5:3779841:G-A;exonic_variant,5:3779841:G-A;protein_coding;missense;GGG>GAG;G>E
AT1G66150	0.619193	7.06774	7.41675e-09	2.72711e-07	UP	no	NO
AT1G12490	3.15495	-1.0274	7.47229e-09	2.74454e-07	UP	no	NO
AT3G11710	0.611839	6.47805	7.59344e-09	2.786e-07	UP	no	NO
AT5G05340	-3.33075	0.46553	7.65834e-09	2.80383e-07	DOWN	no	NO
AT4G30290	1.90254	5.64302	7.6587e-09	2.80383e-07	UP	no	NO
AT1G76080	-0.688394	8.01403	7.85966e-09	2.87428e-07	DOWN	no	NO
AT5G64420	0.670424	5.18459	7.97423e-09	2.91301e-07	UP	no	YES	5:25761424:T-TG;exonic_variant
AT1G66725	-1.40415	1.74882	8.00617e-09	2.92152e-07	DOWN	no	NO
AT3G45440	1.96868	-0.602751	8.27595e-09	3.01669e-07	UP	no	NO
AT3G20210	-3.14106	-0.67917	8.37282e-09	3.0487e-07	DOWN	no	NO
AT1G08260	0.784305	4.5132	8.40753e-09	3.05727e-07	UP	no	NO
AT3G46800	5.01904	-2.85059	8.41451e-09	3.05727e-07	UP	no	NO
AT3G26080	-0.677823	4.07961	8.52367e-09	3.0936e-07	DOWN	no	NO
AT2G36750	-2.85706	1.28402	8.63762e-09	3.13158e-07	DOWN	no	NO
AT3G07110	0.695987	6.46327	8.66196e-09	3.13703e-07	UP	no	NO
AT5G46490	-0.841408	4.43002	8.91784e-09	3.22623e-07	DOWN	no	NO
AT1G04350	-0.638071	6.64524	9.0709e-09	3.27808e-07	DOWN	no	NO
AT3G17050	1.3188	2.11969	9.1587e-09	3.30326e-07	UP	no	YES	3:5816271:T-C;exonic_variant
AT3G04240	0.515646	6.95213	9.16018e-09	3.30326e-07	UP	no	NO
AT3G05345	-0.615604	5.40158	9.27481e-09	3.34102e-07	DOWN	no	NO
AT1G78510	-0.715925	5.89954	9.34684e-09	3.36336e-07	DOWN	no	NO
AT4G22890	-0.63465	9.20143	9.36052e-09	3.36469e-07	DOWN	no	NO
AT4G12730	1.6226	4.71386	9.37742e-09	3.36717e-07	UP	no	NO
AT3G21380	-3.17759	0.834151	9.40199e-09	3.3724e-07	DOWN	no	NO
AT2G42580	1.06505	5.35221	9.7617e-09	3.4977e-07	UP	no	NO
AT4G36648	0.890416	7.25389	9.78858e-09	3.49951e-07	UP	no	YES	4:17280294:T-TAA;exonic_variant,4:17279880:G-GA;exonic_variant,4:17282119:C-CT;intronic_variant,4:17282119:C-CT;exonic_variant
AT2G35630	0.623782	7.02949	9.79767e-09	3.49951e-07	UP	no	NO
AT5G09440	1.16745	4.3611	9.79792e-09	3.49951e-07	UP	no	NO
AT1G60590	-1.11279	5.33237	9.8528e-09	3.51538e-07	DOWN	no	NO
AT5G18440	0.74695	3.84149	9.90927e-09	3.53179e-07	UP	no	NO
AT5G67280	-0.937473	4.25969	9.92433e-09	3.53342e-07	DOWN	no	NO
AT1G74950	1.73593	5.51925	1.01533e-08	3.61114e-07	UP	no	NO
AT4G13840	-0.641941	5.76112	1.02352e-08	3.63641e-07	DOWN	no	NO
AT1G77940	0.638102	6.50351	1.03106e-08	3.65932e-07	UP	no	NO
AT5G56250	-0.917312	4.10015	1.03652e-08	3.67484e-07	DOWN	no	NO
AT5G28263	-2.11429	0.0187555	1.04206e-08	3.69031e-07	DOWN	no	NO
AT1G17100	-0.781919	5.67654	1.04307e-08	3.69031e-07	DOWN	no	NO
AT5G03390	1.8668	0.603188	1.05392e-08	3.72476e-07	UP	no	NO
AT5G67630	0.687664	4.0389	1.05957e-08	3.74083e-07	UP	no	NO
AT4G38470	1.19081	6.77773	1.06189e-08	3.74509e-07	UP	no	YES	4:18002332:C-T;exonic_variant,4:18002332:C-T;protein_coding;sense;TAC>TAT;Y>Y
AT1G48570	1.02925	3.8145	1.06846e-08	3.7643e-07	UP	no	NO
AT1G76570	-0.684083	5.1463	1.08593e-08	3.82186e-07	DOWN	no	NO
AT3G04760	-0.578106	6.13903	1.09429e-08	3.84727e-07	DOWN	no	NO
AT2G34010	1.94515	0.86945	1.1155e-08	3.91774e-07	UP	no	NO
AT1G64810	-0.579828	5.18258	1.11958e-08	3.92719e-07	DOWN	no	NO
AT2G44120	0.671685	6.90998	1.12052e-08	3.92719e-07	UP	no	NO
AT1G76530	-3.59691	-0.778577	1.1268e-08	3.94507e-07	DOWN	no	NO
AT1G18890	0.599657	5.03151	1.15684e-08	4.04605e-07	UP	no	NO
AT1G05690	-1.1039	2.43887	1.16126e-08	4.05233e-07	DOWN	no	NO
AT1G04480	0.642985	6.4086	1.16198e-08	4.05233e-07	UP	no	NO
AT1G35420	-0.559173	6.56222	1.16224e-08	4.05233e-07	DOWN	no	NO
AT3G28340	1.68975	1.42087	1.16731e-08	4.06579e-07	UP	no	NO
AT3G13530	0.617801	5.40815	1.17959e-08	4.10431e-07	UP	no	NO
AT1G22840	0.58803	6.04094	1.20482e-08	4.18776e-07	UP	no	NO
AT4G37295	1.80462	0.190111	1.21336e-08	4.21313e-07	UP	no	NO
AT2G45730	0.596439	4.54861	1.22083e-08	4.23468e-07	UP	no	NO
AT4G08620	2.98654	-1.35393	1.24172e-08	4.30271e-07	UP	no	YES	4:5504295:G-GTTT;intronic_variant
AT1G04040	1.34622	4.89451	1.24452e-08	4.30419e-07	UP	no	NO
AT2G31610	0.565864	7.04051	1.2447e-08	4.30419e-07	UP	no	NO
AT1G10020	1.58754	4.22231	1.25384e-08	4.33134e-07	UP	no	NO
AT2G40955	1.89292	0.458282	1.28954e-08	4.45011e-07	UP	no	NO
AT3G06510	-0.658771	7.25011	1.2931e-08	4.45782e-07	DOWN	no	NO
AT3G09810	0.701442	4.01355	1.32589e-08	4.56618e-07	UP	no	NO
AT3G19620	-1.28605	3.27457	1.32934e-08	4.5734e-07	DOWN	no	NO
AT3G01060	-0.855017	6.52543	1.33124e-08	4.57526e-07	DOWN	no	NO
AT5G11520	0.603666	6.15184	1.34123e-08	4.60486e-07	UP	no	NO
AT1G78080	0.538081	7.60944	1.343e-08	4.60486e-07	UP	no	NO
AT4G00750	0.608961	5.53525	1.34395e-08	4.60486e-07	UP	no	NO
AT2G29970	-0.668565	5.29356	1.35873e-08	4.65076e-07	DOWN	no	NO
AT4G29510	0.68434	4.64741	1.36072e-08	4.65247e-07	UP	no	NO
AT5G26000	-0.674919	10.8845	1.36199e-08	4.65247e-07	DOWN	no	NO
AT3G22150	-0.558117	5.85726	1.37089e-08	4.67811e-07	DOWN	no	NO
AT1G32490	0.538829	6.05857	1.37243e-08	4.67862e-07	UP	yes	NO
AT1G05300	1.14552	3.28397	1.37473e-08	4.68173e-07	UP	no	NO
AT1G70090	1.69424	5.50962	1.41332e-08	4.8083e-07	UP	no	NO
AT2G35130	-0.662634	5.19	1.43664e-08	4.88268e-07	DOWN	no	NO
AT5G37710	0.8329	4.01623	1.45107e-08	4.92338e-07	UP	no	NO
AT5G25460	0.657236	8.61052	1.45153e-08	4.92338e-07	UP	no	NO
AT4G13940	0.654633	9.61997	1.4565e-08	4.93524e-07	UP	no	NO
AT5G59870	0.841902	5.61085	1.45961e-08	4.94081e-07	UP	no	NO
AT3G54730	2.60135	-0.112568	1.47201e-08	4.97778e-07	UP	no	NO
ATMG00410	1.49216	1.39613	1.47674e-08	4.98878e-07	UP	no	NO
AT1G71130	-0.793991	3.85342	1.48988e-08	5.02812e-07	DOWN	no	NO
AT2G29090	-0.871805	5.34269	1.49318e-08	5.03422e-07	DOWN	no	YES	2:12499043:G-A;protein_coding;missense;TCT>TTT;S>F
AT1G08250	-0.968472	3.34932	1.50472e-08	5.06805e-07	DOWN	no	NO
AT3G21760	-0.93487	5.10599	1.50636e-08	5.06851e-07	DOWN	no	NO
AT5G04275	-3.45548	-1.75056	1.51339e-08	5.08706e-07	DOWN	no	NO
AT2G27310	1.47224	2.96037	1.54375e-08	5.17858e-07	UP	no	NO
AT5G01220	-1.17168	6.47826	1.5438e-08	5.17858e-07	DOWN	no	NO
AT4G00100	0.604066	7.29931	1.54523e-08	5.17858e-07	UP	no	NO
AT1G54020	3.09955	-0.808603	1.55294e-08	5.19926e-07	UP	no	NO
AT1G49470	-0.997124	3.77513	1.56456e-08	5.23063e-07	DOWN	no	NO
AT4G01980	3.55625	-1.65297	1.56541e-08	5.23063e-07	UP	no	NO
AT3G23830	0.886617	4.39275	1.63275e-08	5.4502e-07	UP	no	NO
AT1G48630	0.810965	5.32794	1.63676e-08	5.45653e-07	UP	yes	NO
AT1G27450	0.555893	5.98037	1.63788e-08	5.45653e-07	UP	no	NO
AT5G45060	-0.585702	5.02652	1.66048e-08	5.52634e-07	DOWN	no	NO
AT1G12990	0.738397	4.87961	1.70157e-08	5.65751e-07	UP	no	NO
AT5G24470	1.04005	3.5686	1.70614e-08	5.66711e-07	UP	no	NO
AT4G12300	-0.633896	4.57965	1.72099e-08	5.71081e-07	DOWN	no	NO
AT1G15820	-0.520649	11.6728	1.75636e-08	5.82244e-07	DOWN	no	NO
AT3G19840	0.575924	4.67414	1.76603e-08	5.84873e-07	UP	yes	NO
AT1G68935	-1.35117	1.52923	1.77886e-08	5.88545e-07	DOWN	no	NO
AT2G31085	1.9937	-0.294061	1.78098e-08	5.88666e-07	UP	no	NO
AT4G01630	3.67707	-0.789614	1.78666e-08	5.89967e-07	UP	no	NO
AT5G66210	0.74258	4.92283	1.80988e-08	5.97048e-07	UP	no	NO
AT3G50430	0.678604	3.91439	1.81693e-08	5.98787e-07	UP	no	YES	3:18715661:G-GT;intronic_variant,3:18715661:G-GT;splice_donor_variant
AT2G07698	1.07081	3.54064	1.82119e-08	5.99606e-07	UP	no	NO
AT4G14240	-0.68982	4.73895	1.82374e-08	5.99857e-07	DOWN	no	NO
AT4G35800	0.57101	7.11245	1.84637e-08	6.06709e-07	UP	no	NO
AT2G18900	0.826167	3.56487	1.84818e-08	6.06712e-07	UP	no	NO
AT1G03590	0.580004	5.05047	1.87165e-08	6.13818e-07	UP	no	YES	1:895475:G-GA;splice_acceptor_region_variant
AT1G49010	-0.737615	5.28647	1.87623e-08	6.14719e-07	DOWN	no	NO
AT4G26288	1.26871	4.20031	1.89182e-08	6.19079e-07	UP	no	NO
AT1G54890	2.32787	-0.1367	1.89472e-08	6.19079e-07	UP	no	NO
AT4G34930	2.26574	-1.07347	1.89504e-08	6.19079e-07	UP	no	NO
AT4G17190	0.693403	4.74201	1.89777e-08	6.19367e-07	UP	no	NO
AT4G17098	-1.64521	1.70429	1.95471e-08	6.37333e-07	DOWN	no	YES	4:9609626:GT-G;intronic_variant,4:9610634:CT-C;exonic_variant
AT1G04820	0.684319	8.35542	1.97423e-08	6.43076e-07	UP	no	NO
AT2G28200	0.703323	4.66744	1.98693e-08	6.46586e-07	UP	no	NO
AT2G32885	1.58842	1.37029	2.00561e-08	6.51775e-07	UP	no	NO
AT5G22920	1.27121	6.94957	2.00674e-08	6.51775e-07	UP	no	NO
AT5G27560	-0.527497	5.66507	2.03802e-08	6.61297e-07	DOWN	no	NO
AT4G01860	0.598191	4.77913	2.06476e-08	6.69327e-07	UP	no	NO
AT5G23575	0.739929	5.64775	2.06987e-08	6.70289e-07	UP	no	NO
AT5G61380	0.831801	4.62307	2.0717e-08	6.70289e-07	UP	no	NO
AT1G69630	3.2326	-1.99519	2.11208e-08	6.82697e-07	UP	no	NO
AT4G28880	0.526222	6.70902	2.14428e-08	6.92441e-07	UP	no	NO
AT2G24640	0.657694	4.04583	2.16696e-08	6.99095e-07	UP	no	NO
AT3G25230	0.604422	5.99204	2.18579e-08	7.04494e-07	UP	no	NO
AT2G37700	2.90351	-1.26346	2.22005e-08	7.14852e-07	UP	no	NO
AT1G59590	1.27801	2.37582	2.23758e-08	7.19809e-07	UP	no	NO
AT2G04039	-0.743294	6.64999	2.24062e-08	7.20097e-07	DOWN	no	NO
AT1G27480	-0.814716	5.26161	2.27226e-08	7.2957e-07	DOWN	no	NO
AT5G61170	0.659719	6.30088	2.335e-08	7.49001e-07	UP	no	NO
AT3G23000	-0.914659	6.97529	2.34077e-08	7.50138e-07	DOWN	no	NO
AT5G11800	0.733979	4.54332	2.35448e-08	7.53813e-07	UP	no	NO
AT3G06380	0.558196	5.89299	2.37438e-08	7.59462e-07	UP	no	NO
AT5G41400	-1.06055	3.00706	2.38655e-08	7.62632e-07	DOWN	no	NO
AT3G08943	0.593487	4.86762	2.4042e-08	7.67545e-07	UP	no	YES	3:2720585:G-GGA;exonic_variant&protein_coding
AT3G48390	1.09363	3.6404	2.43254e-08	7.75855e-07	UP	no	NO
AT4G39880	0.604758	4.52114	2.43534e-08	7.76013e-07	UP	no	NO
AT2G43690	-1.1449	1.71966	2.48926e-08	7.92446e-07	DOWN	no	NO
AT1G77030	0.826236	4.00658	2.50427e-08	7.95948e-07	UP	no	NO
AT2G25240	2.19244	0.416104	2.50499e-08	7.95948e-07	UP	no	NO
AT1G31660	0.786456	3.97757	2.51127e-08	7.97193e-07	UP	no	NO
AT2G19670	1.27425	2.2729	2.55893e-08	8.11558e-07	UP	no	NO
AT1G04270	0.578108	7.73508	2.5788e-08	8.17087e-07	UP	no	NO
AT2G39855	1.47302	0.951974	2.59772e-08	8.22309e-07	UP	no	NO
AT5G38420	-0.602851	10.8821	2.62393e-08	8.29826e-07	DOWN	no	NO
AT1G53730	0.592606	5.3922	2.65089e-08	8.37568e-07	UP	no	NO
AT2G26710	0.976752	3.31128	2.681e-08	8.45662e-07	UP	no	NO
AT4G31210	0.797607	4.66202	2.68153e-08	8.45662e-07	UP	no	NO
AT1G25550	0.705176	7.22237	2.6867e-08	8.465e-07	UP	no	NO
AT1G73480	-0.893658	7.78059	2.70911e-08	8.52761e-07	DOWN	no	NO
AT5G44980	1.24493	0.963466	2.74887e-08	8.64469e-07	UP	no	NO
AT5G20150	-1.83062	6.09623	2.76177e-08	8.67368e-07	DOWN	no	NO
AT2G14080	-0.54737	5.65244	2.76324e-08	8.67368e-07	DOWN	no	NO
AT1G16320	-0.662536	6.53554	2.77735e-08	8.70987e-07	DOWN	no	NO
AT1G51440	-1.3368	1.20923	2.80039e-08	8.77393e-07	DOWN	no	NO
AT1G65930	0.562173	8.59241	2.8162e-08	8.81529e-07	UP	no	NO
AT5G20080	0.590695	5.65889	2.85607e-08	8.9318e-07	UP	no	YES	5:6784151:C-T;intronic_variant
AT1G22910	0.565689	4.74222	2.86423e-08	8.949e-07	UP	no	NO
AT4G08535	2.47001	-1.71891	2.86879e-08	8.95492e-07	UP	no	NO
AT5G21160	0.713265	6.25689	2.87522e-08	8.9667e-07	UP	no	NO
AT5G40340	0.615237	6.17049	2.9257e-08	9.11569e-07	UP	no	NO
AT1G17560	1.19409	1.88742	2.93567e-08	9.13e-07	UP	no	NO
AT3G11660	-0.634868	5.24451	2.93572e-08	9.13e-07	DOWN	no	NO
AT4G37200	-0.522359	6.19378	2.99855e-08	9.3168e-07	DOWN	no	NO
AT4G09900	-0.72881	5.01618	3.00242e-08	9.32024e-07	DOWN	no	NO
AT1G80190	0.731505	3.93885	3.09245e-08	9.59086e-07	UP	no	NO
AT1G27730	1.47683	3.84951	3.18285e-08	9.86215e-07	UP	no	YES	1:9648907:C-T;protein_coding;missense;GGA>AGA;G>R
AT1G79440	0.807028	4.64971	3.22347e-08	9.97882e-07	UP	no	NO
AT3G29410	1.5986	1.64913	3.25204e-08	1.0058e-06	UP	no	NO
AT2G20840	0.705487	3.64234	3.3148e-08	1.02427e-06	UP	no	NO
AT1G23480	1.16488	4.429	3.36988e-08	1.04034e-06	UP	no	NO
AT3G21560	-0.955216	4.25794	3.38065e-08	1.04271e-06	DOWN	no	NO
AT3G54920	1.11122	5.95892	3.38409e-08	1.04281e-06	UP	no	NO
AT1G67910	0.881773	4.04539	3.44224e-08	1.05976e-06	UP	no	NO
AT2G34170	-0.621932	5.434	3.52486e-08	1.08421e-06	DOWN	no	NO
AT1G03470	0.924266	2.90484	3.52862e-08	1.08438e-06	UP	no	NO
AT1G23160	3.65593	-0.81897	3.53835e-08	1.08592e-06	UP	no	NO
AT5G40740	0.62993	4.74242	3.54009e-08	1.08592e-06	UP	no	NO
AT4G15530	0.955221	7.80924	3.62953e-08	1.11234e-06	UP	no	NO
AT3G10230	-0.531664	6.55577	3.65232e-08	1.11831e-06	DOWN	no	NO
AT5G42460	0.998264	2.77855	3.70314e-08	1.13284e-06	UP	no	NO
AT4G20830	0.673647	5.65161	3.7086e-08	1.13348e-06	UP	no	NO
AT2G28550	-0.568922	6.54783	3.77778e-08	1.15357e-06	DOWN	no	NO
AT4G12600	0.891203	5.26713	3.80797e-08	1.16168e-06	UP	no	NO
AT1G56540	1.58278	0.9965	3.81121e-08	1.16168e-06	UP	no	NO
AT2G21850	1.51654	1.92073	3.84997e-08	1.17243e-06	UP	no	NO
AT1G09710	0.85888	3.49497	3.86473e-08	1.17586e-06	UP	no	NO
AT5G38700	1.82891	0.0997972	3.88363e-08	1.18055e-06	UP	no	NO
AT5G19500	-0.649764	4.97957	3.89696e-08	1.18353e-06	DOWN	no	NO
AT3G50330	2.00389	2.03541	3.91704e-08	1.18856e-06	UP	no	NO
AT2G38680	-0.794726	3.38743	3.92615e-08	1.19025e-06	DOWN	no	NO
AT2G01590	-0.759355	5.64383	3.97552e-08	1.20413e-06	DOWN	no	NO
AT1G06630	0.599385	4.56072	4.03867e-08	1.22216e-06	UP	no	NO
AT3G45900	-0.577801	4.47434	4.0442e-08	1.22273e-06	DOWN	no	NO
AT4G18130	-0.52966	5.79783	4.10136e-08	1.23891e-06	DOWN	no	YES	4:10044454:A-T;protein_coding;missense;TTT>ATT;F>I
AT5G37770	1.07094	5.03966	4.12983e-08	1.24639e-06	UP	no	NO
AT5G44610	1.07634	3.65017	4.32152e-08	1.30307e-06	UP	no	NO
AT4G08410	1.89592	2.43677	4.39018e-08	1.32259e-06	UP	no	NO
AT4G31120	0.703973	4.62822	4.41186e-08	1.32793e-06	UP	yes	NO
AT5G66750	0.88063	3.23035	4.44596e-08	1.337e-06	UP	no	NO
AT2G07734	1.56574	0.179136	4.49243e-08	1.34977e-06	UP	no	NO
AT2G31830	1.33754	1.13211	4.54416e-08	1.3641e-06	UP	no	NO
AT1G64760	0.960038	3.00108	4.62956e-08	1.3885e-06	UP	no	NO
AT1G11260	1.21726	9.06818	4.63522e-08	1.38896e-06	UP	no	NO
AT2G40080	1.64247	-0.0451646	4.65799e-08	1.39454e-06	UP	no	NO
AT4G38960	-0.963723	3.75116	4.69024e-08	1.40295e-06	DOWN	no	NO
AT4G28703	1.07726	2.81475	4.71089e-08	1.40787e-06	UP	no	NO
AT3G55840	1.39073	1.39821	4.77168e-08	1.42478e-06	UP	no	NO
AT1G20950	0.606535	5.40736	4.84729e-08	1.44607e-06	UP	no	NO
AT3G13450	1.09869	6.18546	4.86129e-08	1.44897e-06	UP	no	NO
AT4G01070	-0.863153	5.03278	4.88258e-08	1.45402e-06	DOWN	no	NO
AT2G36970	-2.29516	2.0701	4.91595e-08	1.46267e-06	DOWN	no	NO
AT2G30970	0.524832	5.7514	4.94888e-08	1.47117e-06	UP	no	NO
AT1G72440	0.659994	4.75854	5.04689e-08	1.49898e-06	UP	no	NO
AT3G21390	-0.591304	4.38516	5.07137e-08	1.50492e-06	DOWN	no	NO
AT3G14390	0.741943	5.01874	5.1121e-08	1.51568e-06	UP	no	NO
AT5G61030	0.950834	3.85799	5.13249e-08	1.5199e-06	UP	yes	NO
AT5G20200	0.550067	5.05009	5.13537e-08	1.5199e-06	UP	no	NO
AT3G16690	0.974709	3.80632	5.14169e-08	1.52043e-06	UP	no	NO
AT1G80040	0.488857	5.99802	5.19967e-08	1.53623e-06	UP	no	NO
AT1G20450	1.21011	7.33904	5.32472e-08	1.5718e-06	UP	no	NO
AT5G40060	-0.596721	4.20121	5.34813e-08	1.57732e-06	DOWN	no	NO
AT4G32600	-0.617356	5.27363	5.37579e-08	1.58409e-06	DOWN	no	NO
AT1G02850	-0.935126	6.04705	5.41105e-08	1.59309e-06	DOWN	no	NO
AT5G05180	0.908719	3.38676	5.44345e-08	1.60028e-06	UP	no	NO
AT4G29990	0.979402	2.96904	5.44496e-08	1.60028e-06	UP	no	NO
AT1G74320	0.589236	5.06603	5.53967e-08	1.62669e-06	UP	no	NO
AT3G54065	3.88079	-2.16223	5.62714e-08	1.65094e-06	UP	no	NO
AT5G04480	0.746075	4.88839	5.69723e-08	1.67005e-06	UP	no	NO
AT3G07320	0.931524	3.9585	5.70702e-08	1.67146e-06	UP	no	NO
AT5G58290	0.509021	6.73144	5.7355e-08	1.67834e-06	UP	no	NO
AT2G01670	-0.790599	5.97825	5.75728e-08	1.68326e-06	DOWN	no	NO
AT4G38740	-0.778151	7.70493	5.76511e-08	1.68408e-06	DOWN	no	NO
AT1G28140	-0.5112	6.3768	5.81884e-08	1.6983e-06	DOWN	no	NO
AT5G64170	-0.630948	7.45473	5.8383e-08	1.70251e-06	DOWN	no	NO
AT4G35740	0.664853	4.01811	5.87523e-08	1.71111e-06	UP	no	NO
AT1G01950	0.60227	4.61531	5.87794e-08	1.71111e-06	UP	no	NO
AT4G32650	0.962922	3.79764	5.90922e-08	1.71873e-06	UP	no	YES	4:15754060:A-AT;intronic_variant
AT2G36530	0.5436	8.50055	5.98044e-08	1.73794e-06	UP	no	NO
AT2G39360	0.665821	4.11824	6.00119e-08	1.74247e-06	UP	no	NO
AT2G34260	0.938548	2.68626	6.01457e-08	1.74485e-06	UP	no	YES	2:14467479:G-A;intronic_variant
AT4G29410	0.603718	5.88752	6.0435e-08	1.75173e-06	UP	no	NO
AT2G37250	0.63275	5.24746	6.06362e-08	1.75605e-06	UP	no	NO
AT5G13520	0.724069	3.89799	6.1594e-08	1.78226e-06	UP	no	NO
AT3G45443	0.669408	4.64276	6.20449e-08	1.79376e-06	UP	no	NO
AT5G52650	0.614363	6.91498	6.27183e-08	1.81168e-06	UP	no	NO
AT5G45275	0.772981	3.94997	6.3433e-08	1.83075e-06	UP	no	NO
AT5G02050	0.860779	3.82051	6.4255e-08	1.85289e-06	UP	no	NO
AT5G58350	0.572157	6.44809	6.43921e-08	1.85525e-06	UP	no	NO
AT2G43530	1.06454	5.03609	6.56834e-08	1.89084e-06	UP	no	NO
AT3G58570	0.674055	4.56368	6.59215e-08	1.89607e-06	UP	yes	NO
AT5G66740	-1.9802	0.194213	6.75979e-08	1.94263e-06	DOWN	no	NO
AT5G23880	0.7263	4.30434	6.78378e-08	1.94786e-06	UP	yes	NO
AT3G61750	-0.812837	3.89571	6.96646e-08	1.99862e-06	DOWN	no	NO
AT2G31083	2.6324	0.673719	7.05099e-08	2.02114e-06	UP	no	NO
AT3G43270	0.699055	4.55164	7.32351e-08	2.0967e-06	UP	no	NO
AT1G55050	-2.03067	0.00735342	7.32703e-08	2.0967e-06	DOWN	no	NO
AT5G23210	0.942171	5.48922	7.36739e-08	2.10572e-06	UP	no	NO
AT1G15440	0.780423	3.82141	7.37104e-08	2.10572e-06	UP	no	NO
AT2G45000	0.693846	4.25905	7.384e-08	2.10763e-06	UP	no	NO
AT4G16630	0.760449	3.98421	7.40012e-08	2.11044e-06	UP	no	YES	4:9363600:G-A;intronic_variant
AT2G03750	-0.817143	5.13855	7.4368e-08	2.11911e-06	DOWN	no	NO
AT3G55130	-0.828322	4.97007	7.48185e-08	2.13014e-06	DOWN	no	NO
AT1G19396	1.3366	2.02215	7.49799e-08	2.13294e-06	UP	no	NO
AT4G26670	0.729322	4.13675	7.51024e-08	2.13462e-06	UP	no	NO
AT1G80480	0.51222	5.6442	7.56749e-08	2.14841e-06	UP	no	NO
AT5G20980	0.627194	4.18976	7.57151e-08	2.14841e-06	UP	no	NO
AT5G04900	-0.551879	4.86903	7.60332e-08	2.15562e-06	DOWN	no	NO
AT1G29690	0.798376	4.44065	7.64707e-08	2.1662e-06	UP	no	NO
AT5G07270	0.538834	5.12717	7.81676e-08	2.21241e-06	UP	no	NO
AT3G29639	4.20378	0.478076	7.8898e-08	2.2312e-06	UP	no	NO
AT5G19230	1.2699	4.15338	8.06563e-08	2.27902e-06	UP	no	NO
AT4G32910	0.536354	5.41067	8.29244e-08	2.34114e-06	UP	no	NO
AT1G44000	-0.706786	6.96153	8.34547e-08	2.35414e-06	DOWN	no	NO
AT3G02650	0.769846	3.49541	8.50014e-08	2.39576e-06	UP	no	NO
AT3G22968	-0.726057	6.44491	8.51768e-08	2.3987e-06	DOWN	no	NO
AT1G10490	0.681957	4.36186	8.54172e-08	2.40346e-06	UP	no	NO
AT4G31398	-2.56497	-0.863181	8.55574e-08	2.40539e-06	DOWN	no	NO
AT3G47675	0.988388	2.33492	8.79482e-08	2.47054e-06	UP	no	NO
AT1G04250	0.700024	5.32899	8.88609e-08	2.4941e-06	UP	no	NO
AT5G11060	-0.631306	5.59844	8.91923e-08	2.50132e-06	DOWN	no	NO
AT2G12170	-1.30487	0.978498	8.982e-08	2.51683e-06	DOWN	no	NO
AT1G78860	1.61006	0.694777	9.01243e-08	2.52325e-06	UP	no	NO
AT4G13260	-1.51038	1.66073	9.14964e-08	2.55954e-06	DOWN	no	NO
AT2G34655	2.05547	-0.574426	9.19179e-08	2.5692e-06	UP	no	NO
AT5G53200	-1.64033	0.818762	9.22731e-08	2.57699e-06	DOWN	no	NO
AT4G38510	0.487613	6.8098	9.34079e-08	2.60652e-06	UP	no	NO
AT4G20020	0.717672	4.17128	9.54244e-08	2.66059e-06	UP	no	NO
AT2G30210	1.5575	2.11179	9.58603e-08	2.66908e-06	UP	no	NO
AT2G19540	0.565053	5.76182	9.58875e-08	2.66908e-06	UP	no	NO
AT1G13260	1.03084	6.09637	9.60138e-08	2.67039e-06	UP	no	NO
AT2G35240	0.72237	4.0754	9.66728e-08	2.68614e-06	UP	no	NO
AT1G53165	0.535834	5.03995	9.67395e-08	2.68614e-06	UP	no	NO
AT3G04840	0.672834	7.91739	9.68592e-08	2.68724e-06	UP	no	NO
AT4G27460	1.10175	2.49216	9.72474e-08	2.69579e-06	UP	no	NO
AT5G09420	1.06804	1.85107	9.83612e-08	2.7234e-06	UP	no	NO
AT3G28200	0.761165	5.98921	9.84049e-08	2.7234e-06	UP	no	NO
AT5G50670	1.21893	4.57346	9.88724e-08	2.73409e-06	UP	no	NO
AT4G00400	0.607698	4.83522	9.91089e-08	2.73764e-06	UP	no	NO
AT2G29530	0.763253	4.28442	9.91634e-08	2.73764e-06	UP	no	NO
AT2G34960	-2.3745	-0.362193	9.93981e-08	2.74187e-06	DOWN	no	NO
AT4G34260	0.574973	6.24665	1.00268e-07	2.7636e-06	UP	no	NO
AT4G00300	0.780241	4.41247	1.00425e-07	2.76568e-06	UP	no	NO
AT5G56880	1.83992	1.01271	1.00975e-07	2.77799e-06	UP	no	NO
AT5G14150	1.68517	-0.113837	1.01037e-07	2.77799e-06	UP	no	NO
AT1G26970	2.37317	-0.314488	1.01474e-07	2.78773e-06	UP	no	NO
AT2G42650	1.09013	1.3201	1.02685e-07	2.8187e-06	UP	no	NO
AT1G73010	-4.11344	3.66294	1.02972e-07	2.82426e-06	DOWN	no	NO
AT2G24150	0.59321	5.4333	1.03129e-07	2.82626e-06	UP	no	NO
AT1G34640	-0.753124	3.21687	1.04031e-07	2.84867e-06	DOWN	no	NO
AT2G04080	0.874354	3.5923	1.0467e-07	2.86383e-06	UP	no	NO
AT5G26860	0.839774	4.34124	1.05629e-07	2.88773e-06	UP	no	NO
AT4G21380	-1.56001	0.918511	1.06817e-07	2.91749e-06	DOWN	no	NO
AT1G15830	-0.66446	4.10619	1.06891e-07	2.91749e-06	DOWN	no	NO
AT1G03055	-0.996898	2.80189	1.08257e-07	2.95238e-06	DOWN	no	NO
AT3G17790	-1.53691	5.89622	1.08952e-07	2.96895e-06	DOWN	no	NO
AT5G49730	-0.826305	9.46467	1.09978e-07	2.99447e-06	DOWN	no	NO
AT2G24820	-0.529791	7.06098	1.10705e-07	3.01185e-06	DOWN	no	NO
AT3G63400	0.524827	5.44973	1.12142e-07	3.04848e-06	UP	yes	NO
AT1G12470	0.510399	5.62737	1.12446e-07	3.05428e-06	UP	no	NO
AT1G04430	0.6515	6.38935	1.12675e-07	3.05802e-06	UP	no	NO
AT4G05150	0.496139	7.80787	1.13681e-07	3.08283e-06	UP	no	NO
AT2G17510	0.511569	5.59784	1.13898e-07	3.08625e-06	UP	yes	NO
AT3G22310	0.855842	3.98629	1.16303e-07	3.14712e-06	UP	no	NO
AT1G76560	0.858862	3.55098	1.16331e-07	3.14712e-06	UP	no	NO
AT5G51150	0.513313	5.61907	1.16838e-07	3.15829e-06	UP	no	NO
AT3G07980	0.597811	4.47463	1.1707e-07	3.16202e-06	UP	no	NO
AT2G20724	0.741801	3.61663	1.17472e-07	3.17032e-06	UP	no	NO
AT1G29320	0.840697	3.08039	1.18821e-07	3.20417e-06	UP	no	NO
AT5G42200	0.928896	3.44466	1.19503e-07	3.21999e-06	UP	no	NO
AT2G26290	1.57193	1.33735	1.20491e-07	3.24335e-06	UP	no	NO
AT5G38880	0.544756	5.50412	1.20563e-07	3.24335e-06	UP	no	NO
AT4G21810	0.513817	6.08397	1.2109e-07	3.25494e-06	UP	no	NO
AT1G12030	-1.88505	1.53392	1.21575e-07	3.26535e-06	DOWN	no	NO
AT2G37820	2.60892	-1.8047	1.22839e-07	3.29669e-06	UP	no	NO
AT1G50020	-0.557793	6.89579	1.23556e-07	3.31328e-06	DOWN	no	NO
AT1G68670	0.661219	6.73149	1.27716e-07	3.42213e-06	UP	no	NO
AT1G31970	0.598922	5.77943	1.27956e-07	3.42581e-06	UP	no	NO
AT4G24580	1.55185	0.829982	1.30263e-07	3.48481e-06	UP	no	NO
AT1G76890	0.591274	5.51428	1.30902e-07	3.49913e-06	UP	no	NO
AT2G05160	-0.858393	3.54699	1.31084e-07	3.50121e-06	DOWN	no	NO
AT3G49530	0.681744	4.55784	1.31533e-07	3.51043e-06	UP	no	NO
AT2G11000	0.529414	4.99917	1.32257e-07	3.52695e-06	UP	no	NO
AT1G69310	0.638419	4.40991	1.33958e-07	3.56949e-06	UP	no	NO
AT2G28000	0.683903	8.21421	1.34952e-07	3.59314e-06	UP	no	NO
AT5G02870	0.595467	7.54801	1.35188e-07	3.59657e-06	UP	no	NO
AT1G14910	0.559543	5.52744	1.35842e-07	3.61113e-06	UP	no	NO
AT2G19480	0.511441	7.00665	1.36439e-07	3.62371e-06	UP	no	NO
AT3G56480	0.775093	4.23561	1.36531e-07	3.62371e-06	UP	no	NO
AT2G35290	1.6162	0.938412	1.3712e-07	3.63648e-06	UP	no	NO
AT4G14746	0.844705	3.41815	1.37874e-07	3.65362e-06	UP	no	NO
AT5G59780	-0.617753	6.97756	1.38725e-07	3.67328e-06	DOWN	no	NO
AT4G38120	0.525432	5.3212	1.39776e-07	3.69818e-06	UP	no	NO
AT1G24510	0.516665	6.76384	1.40267e-07	3.70828e-06	UP	no	NO
AT2G26630	1.99529	-0.5603	1.41998e-07	3.75109e-06	UP	no	NO
AT2G40860	-0.587169	4.24201	1.43168e-07	3.77902e-06	DOWN	no	NO
AT5G56850	-0.596703	6.50582	1.4557e-07	3.83942e-06	DOWN	no	NO
AT5G35400	-0.969776	2.56843	1.46576e-07	3.86293e-06	DOWN	no	YES	5:13601967:C-T;protein_coding;stop-gain;TGG>TGA;W>*,5:13602004:C-T;intronic_variant,5:13601967:C-T;intronic_variant,5:13602004:C-T;splice_acceptor_region_variant
AT1G14010	0.567763	4.33695	1.47704e-07	3.8869e-06	UP	no	NO
AT5G08750	-0.611917	4.4216	1.47716e-07	3.8869e-06	DOWN	no	NO
AT5G22660	2.77715	-1.98367	1.48422e-07	3.90242e-06	UP	no	NO
AT1G60640	0.753889	3.62561	1.49517e-07	3.92588e-06	UP	no	NO
AT4G30825	-0.5391	4.65965	1.49547e-07	3.92588e-06	DOWN	no	NO
AT1G29900	0.58889	6.61854	1.51254e-07	3.9676e-06	UP	no	NO
AT3G53630	0.692191	5.0738	1.5207e-07	3.98545e-06	UP	no	NO
AT3G47800	0.826736	5.87144	1.52171e-07	3.98545e-06	UP	no	NO
AT4G38840	-1.0283	4.64839	1.53977e-07	4.0296e-06	DOWN	no	NO
AT2G35880	0.89094	5.20919	1.5418e-07	4.03178e-06	UP	no	YES	2:15065868:AG-A;exonic_variant
AT2G17787	0.65701	3.90959	1.56002e-07	4.07626e-06	UP	no	NO
AT5G09590	0.581464	5.3648	1.56472e-07	4.08537e-06	UP	no	NO
AT1G78150	0.526447	6.22517	1.56928e-07	4.09411e-06	UP	no	NO
AT2G42710	0.699973	3.70744	1.57943e-07	4.11602e-06	UP	no	NO
AT4G33920	0.584662	4.9605	1.58135e-07	4.11602e-06	UP	no	NO
AT3G56260	-1.58971	1.19411	1.58221e-07	4.11602e-06	DOWN	no	NO
AT5G19820	0.484416	6.73514	1.58257e-07	4.11602e-06	UP	no	YES	5:6699742:C-T;protein_coding;missense;GGT>AGT;G>S
AT2G01300	1.89586	0.80552	1.58408e-07	4.11677e-06	UP	no	NO
AT3G22840	-1.30317	2.82116	1.59137e-07	4.13254e-06	DOWN	no	NO
AT1G15480	1.07676	2.86471	1.59985e-07	4.15136e-06	UP	no	NO
AT1G68490	-0.582584	6.04587	1.61727e-07	4.19333e-06	DOWN	no	NO
AT5G16810	0.506755	5.226	1.63295e-07	4.23072e-06	UP	no	NO
AT1G27720	1.34627	0.732768	1.64681e-07	4.26336e-06	UP	no	NO
AT1G56510	-0.586961	5.23418	1.66987e-07	4.31974e-06	DOWN	no	NO
AT1G14610	0.492433	6.93947	1.7237e-07	4.45557e-06	UP	no	NO
AT5G07650	2.28723	-1.02391	1.73921e-07	4.49221e-06	UP	no	NO
AT3G05880	0.674602	7.12948	1.74902e-07	4.51407e-06	UP	no	NO
AT1G06840	0.601275	4.6778	1.76133e-07	4.54236e-06	UP	no	NO
AT2G47015	-1.85567	3.19391	1.78898e-07	4.61016e-06	DOWN	no	NO
AT1G51175	6.22206	-2.88513	1.79142e-07	4.61291e-06	UP	no	NO
AT5G23900	0.531175	6.8082	1.81468e-07	4.66924e-06	UP	no	NO
AT2G24220	-0.895071	2.39763	1.83414e-07	4.71569e-06	DOWN	no	NO
AT1G27670	1.44614	2.65485	1.83963e-07	4.7262e-06	UP	no	NO
AT5G40500	-0.65633	5.02592	1.84407e-07	4.73401e-06	DOWN	no	NO
AT5G13960	0.667905	3.86356	1.84939e-07	4.74405e-06	UP	no	NO
AT4G24240	0.655501	4.33348	1.88514e-07	4.83206e-06	UP	no	NO
AT3G25770	1.05309	6.77526	1.8906e-07	4.84238e-06	UP	no	NO
AT2G44500	1.60675	5.12135	1.89853e-07	4.85899e-06	UP	no	NO
AT1G26630	0.516191	8.88748	1.9032e-07	4.86438e-06	UP	no	NO
AT5G20120	0.554639	4.59421	1.90358e-07	4.86438e-06	UP	no	NO
AT2G45290	1.03691	4.24545	1.90552e-07	4.86438e-06	UP	no	NO
AT1G69370	0.827048	3.90619	1.90641e-07	4.86438e-06	UP	no	NO
AT5G26850	0.711357	6.13868	1.93639e-07	4.93349e-06	UP	no	NO
AT5G16280	0.509749	5.85327	1.93643e-07	4.93349e-06	UP	no	NO
AT3G22860	2.1671	-1.74137	1.93866e-07	4.93349e-06	UP	no	NO
AT1G67140	0.514847	6.17387	1.93935e-07	4.93349e-06	UP	no	NO
AT5G45775	0.577257	6.32751	1.95467e-07	4.96869e-06	UP	no	NO
AT2G24540	-1.23569	5.01571	1.9681e-07	4.99692e-06	DOWN	no	NO
AT4G26610	0.548571	5.11996	1.96874e-07	4.99692e-06	UP	no	NO
AT2G40930	0.491946	5.47419	1.98581e-07	5.03645e-06	UP	no	NO
AT4G23540	0.68185	3.75934	1.99104e-07	5.04593e-06	UP	no	NO
AT3G09922	-6.8546	3.18456	1.9982e-07	5.05668e-06	DOWN	no	NO
AT3G16850	0.540541	6.54527	1.99897e-07	5.05668e-06	UP	no	NO
AT2G34720	-0.537849	6.00542	2.0006e-07	5.05668e-06	DOWN	no	NO
AT5G64760	0.597097	4.29838	2.00166e-07	5.05668e-06	UP	no	NO
AT2G47760	0.60778	4.27995	2.00279e-07	5.05668e-06	UP	no	NO
AT5G27320	-0.546412	5.08016	2.00678e-07	5.06295e-06	DOWN	no	NO
AT4G37070	1.06809	3.48219	2.03312e-07	5.12555e-06	UP	no	NO
AT1G63450	1.68988	-0.166517	2.04233e-07	5.14493e-06	UP	no	NO
AT2G30600	1.26178	7.53298	2.07203e-07	5.21586e-06	UP	no	NO
AT4G36770	2.59661	-0.96733	2.11539e-07	5.31893e-06	UP	no	NO
AT1G02670	1.23855	1.39202	2.11614e-07	5.31893e-06	UP	no	NO
AT1G22980	1.39895	0.0344543	2.11982e-07	5.32422e-06	UP	no	NO
AT3G63140	-0.489585	8.45722	2.13197e-07	5.35073e-06	DOWN	no	NO
AT5G55840	-0.848268	2.91294	2.13848e-07	5.36309e-06	DOWN	no	NO
AT2G34770	0.907878	5.63708	2.15843e-07	5.40908e-06	UP	no	NO
AT2G05310	-0.612956	7.45759	2.1752e-07	5.44704e-06	DOWN	no	NO
AT5G23770	-1.17009	1.18655	2.22102e-07	5.55765e-06	DOWN	no	NO
AT1G75240	0.786999	5.16764	2.22391e-07	5.56077e-06	UP	no	NO
AT3G09160	-0.872753	3.62994	2.22866e-07	5.5685e-06	DOWN	no	NO
AT1G58380	0.605991	4.65075	2.24371e-07	5.60033e-06	UP	no	NO
AT5G01400	0.501782	5.64891	2.24472e-07	5.60033e-06	UP	no	NO
AT4G28190	1.19407	3.03655	2.29249e-07	5.71527e-06	UP	no	NO
AT2G32320	0.58992	5.03961	2.29577e-07	5.71921e-06	UP	no	NO
AT5G27850	0.597821	7.75315	2.30549e-07	5.73919e-06	UP	no	NO
AT1G07880	1.03782	1.77402	2.32593e-07	5.78579e-06	UP	no	NO
AT1G61520	-0.465383	12.3135	2.34548e-07	5.83011e-06	DOWN	no	NO
AT1G73630	-1.18744	2.34331	2.35244e-07	5.84312e-06	DOWN	no	NO
AT3G27360	0.785688	4.65943	2.39565e-07	5.94605e-06	UP	no	NO
AT1G65490	-1.08541	4.11056	2.40599e-07	5.96732e-06	DOWN	no	NO
AT3G14590	0.675766	4.7514	2.41303e-07	5.97872e-06	UP	no	NO
AT4G30650	0.881453	3.73346	2.41414e-07	5.97872e-06	UP	no	NO
AT5G01090	-0.545633	5.45155	2.42272e-07	5.99177e-06	DOWN	no	NO
AT1G22740	0.841737	3.5839	2.42338e-07	5.99177e-06	UP	no	NO
AT5G24590	0.55163	4.82698	2.42531e-07	5.99177e-06	UP	no	NO
AT5G66080	0.658525	3.61428	2.42652e-07	5.99177e-06	UP	no	NO
AT1G34030	0.572539	6.52297	2.44482e-07	6.03253e-06	UP	no	NO
AT3G16780	0.53451	5.16439	2.47506e-07	6.10074e-06	UP	no	NO
AT1G78230	-0.789152	4.01883	2.47609e-07	6.10074e-06	DOWN	no	NO
AT4G23250	-0.836573	4.53103	2.48175e-07	6.11023e-06	DOWN	no	NO
AT2G30360	0.923389	4.35905	2.48654e-07	6.11755e-06	UP	no	NO
AT5G53048	-3.24432	2.99252	2.4961e-07	6.13659e-06	DOWN	no	NO
AT5G45990	1.43918	0.877259	2.49979e-07	6.14118e-06	UP	yes	NO
AT3G57550	0.811438	5.34994	2.51178e-07	6.16353e-06	UP	no	NO
AT5G16900	1.77863	-0.390596	2.51255e-07	6.16353e-06	UP	no	NO
AT2G07755	1.36238	0.83923	2.52735e-07	6.18478e-06	UP	no	YES	2:3324829:C-CCT;exonic_variant
AT3G04490	0.487425	5.65249	2.52773e-07	6.18478e-06	UP	no	NO
AT3G04820	0.6655	3.8512	2.52806e-07	6.18478e-06	UP	no	NO
AT4G23300	-0.609613	5.38139	2.52856e-07	6.18478e-06	DOWN	no	NO
AT1G78190	1.23653	0.26388	2.54345e-07	6.21668e-06	UP	no	NO
AT2G34510	0.962493	5.46819	2.6517e-07	6.47656e-06	UP	no	NO
AT1G68830	-0.549236	7.45196	2.66015e-07	6.4925e-06	DOWN	no	NO
AT2G07792	0.766511	4.50363	2.67066e-07	6.51343e-06	UP	no	YES	2:3338190:C-T;exonic_variant,2:3333809:A-G;exonic_variant,2:3335669:C-G;exonic_variant
AT4G17240	0.712731	3.73998	2.70646e-07	6.59596e-06	UP	no	YES	4:9666689:TC-T;exonic_variant,4:9667453:T-TA;intronic_variant,4:9667734:AG-A;splice_acceptor_region_variant,4:9667734:AG-A;intronic_variant,4:9668369:G-GT;exonic_variant
AT4G34135	-1.71876	3.20947	2.71378e-07	6.60903e-06	DOWN	no	NO
AT2G18193	2.14037	1.66264	2.76034e-07	6.71756e-06	UP	no	NO
AT4G00810	0.509537	6.06398	2.77385e-07	6.74555e-06	UP	no	NO
AT5G19450	0.505058	5.81079	2.78042e-07	6.75666e-06	UP	no	NO
AT1G15890	1.1512	1.95007	2.80367e-07	6.80825e-06	UP	no	NO
AT2G14045	-0.524429	5.4104	2.81334e-07	6.82682e-06	DOWN	no	NO
AT5G23740	0.568981	6.91722	2.84106e-07	6.8891e-06	UP	no	NO
AT5G11340	0.602653	4.09959	2.8446e-07	6.89274e-06	UP	no	YES	5:3620753:A-AT;intronic_variant,5:3620790:C-CT;intronic_variant
AT1G27310	0.533134	5.83982	2.87769e-07	6.96507e-06	UP	no	NO
AT1G04200	0.568119	4.64292	2.87859e-07	6.96507e-06	UP	no	NO
AT5G14360	1.22919	1.80994	2.89525e-07	7.00036e-06	UP	no	NO
AT4G37190	0.658427	4.19434	2.91812e-07	7.04837e-06	UP	no	NO
AT2G24160	-1.26769	2.46192	2.9193e-07	7.04837e-06	DOWN	no	NO
AT2G43510	-1.21884	2.68546	2.92576e-07	7.05893e-06	DOWN	no	NO
AT4G33030	-0.784662	6.59093	2.97259e-07	7.16271e-06	DOWN	no	NO
AT1G35560	-0.913262	3.39531	2.97303e-07	7.16271e-06	DOWN	no	NO
AT4G12750	0.728066	3.61102	2.98058e-07	7.17576e-06	UP	no	NO
AT4G27710	-0.568049	6.47885	2.99676e-07	7.20956e-06	DOWN	no	NO
AT1G27580	3.30663	-0.880019	3.00029e-07	7.21291e-06	UP	no	NO
AT2G01190	0.65116	5.22706	3.02163e-07	7.25903e-06	UP	no	NO
AT3G09630	0.494279	7.55243	3.05147e-07	7.32549e-06	UP	no	NO
AT5G19730	-0.866382	4.20616	3.05528e-07	7.32942e-06	DOWN	no	NO
AT1G32080	-0.578856	8.27782	3.06818e-07	7.35511e-06	DOWN	no	NO
AT1G55480	-0.560294	7.71502	3.07381e-07	7.36338e-06	DOWN	no	NO
AT3G29290	-0.534348	5.36544	3.11458e-07	7.45573e-06	DOWN	no	NO
AT3G60245	0.578798	7.59023	3.1348e-07	7.49372e-06	UP	no	NO
AT4G02570	0.473588	7.68959	3.1349e-07	7.49372e-06	UP	no	NO
AT5G14210	-0.563677	5.24438	3.15878e-07	7.54077e-06	DOWN	no	NO
AT3G29631	4.93451	-0.176194	3.15906e-07	7.54077e-06	UP	no	NO
AT5G59770	-0.634671	5.03072	3.19904e-07	7.63079e-06	DOWN	no	NO
AT1G14850	0.565665	5.08546	3.21954e-07	7.67426e-06	UP	no	NO
AT1G14810	0.616484	5.41421	3.25161e-07	7.74522e-06	UP	no	NO
AT3G43430	1.23125	1.3218	3.25956e-07	7.75867e-06	UP	no	NO
AT1G74290	-0.956099	2.39441	3.26271e-07	7.7592e-06	DOWN	no	NO
AT1G55670	-0.484067	10.8405	3.26439e-07	7.7592e-06	DOWN	no	NO
AT1G52080	-0.76749	3.11816	3.26908e-07	7.76441e-06	DOWN	no	NO
AT2G17690	5.64994	-1.4464	3.27119e-07	7.76441e-06	UP	no	NO
AT5G58510	0.516479	5.27938	3.2933e-07	7.81138e-06	UP	no	NO
AT5G63160	1.21802	7.28042	3.30682e-07	7.83794e-06	UP	no	NO
AT2G34750	0.480207	6.29592	3.31858e-07	7.86028e-06	UP	no	NO
AT5G17820	1.10957	4.40788	3.32713e-07	7.87498e-06	UP	no	NO
AT2G04110	-0.575694	5.21734	3.3376e-07	7.89421e-06	DOWN	no	NO
AT3G10190	0.831155	2.85635	3.34896e-07	7.91553e-06	UP	no	NO
AT1G76550	0.706424	4.44956	3.3666e-07	7.95165e-06	UP	no	NO
AT1G23870	0.721854	6.613	3.38054e-07	7.97488e-06	UP	no	NO
AT3G02380	-1.51299	5.71999	3.38117e-07	7.97488e-06	DOWN	no	NO
AT5G13710	0.556711	5.97546	3.39572e-07	8.00359e-06	UP	no	NO
AT1G79970	-0.585247	6.27824	3.41194e-07	8.03619e-06	DOWN	no	NO
AT2G36800	-12.6987	3.051	3.45998e-07	8.14364e-06	DOWN	no	NO
AT1G51860	0.931669	2.36573	3.49532e-07	8.22109e-06	UP	no	NO
AT4G32720	0.589031	5.29197	3.51547e-07	8.2627e-06	UP	yes	NO
AT1G53540	3.01118	-0.0340934	3.52756e-07	8.27597e-06	UP	no	NO
AT2G47060	0.611697	5.06936	3.52807e-07	8.27597e-06	UP	no	NO
AT3G47430	-0.982622	5.6496	3.52849e-07	8.27597e-06	DOWN	no	NO
AT5G39740	0.557666	7.98283	3.55856e-07	8.34054e-06	UP	no	NO
AT4G36970	0.724308	5.04094	3.56097e-07	8.34054e-06	UP	no	NO
AT1G70280	0.586927	5.30815	3.58765e-07	8.39719e-06	UP	no	NO
AT5G40870	0.513888	4.98186	3.59238e-07	8.40244e-06	UP	no	NO
AT1G11785	1.72257	-0.420139	3.66332e-07	8.5624e-06	UP	no	NO
AT1G18800	0.623376	4.97836	3.66836e-07	8.5662e-06	UP	no	NO
AT1G61190	-0.616203	6.05271	3.67003e-07	8.5662e-06	DOWN	no	YES	1:22560060:C-T;exonic_variant,1:22560060:C-T;protein_coding;missense;CCC>CTC;P>L,1:22556183:C-T;exonic_variant
AT1G16130	1.21617	1.36289	3.71087e-07	8.65552e-06	UP	no	NO
AT3G08730	-0.507709	6.76112	3.72511e-07	8.68272e-06	DOWN	no	NO
AT1G44780	0.75199	3.12449	3.75177e-07	8.73881e-06	UP	no	NO
AT4G27360	-1.99928	-0.232991	3.76632e-07	8.76115e-06	DOWN	no	NO
AT3G59140	-1.33722	4.26317	3.76656e-07	8.76115e-06	DOWN	no	NO
AT3G57330	0.929761	4.92875	3.78818e-07	8.80536e-06	UP	no	NO
AT4G14960	0.513212	8.68521	3.83172e-07	8.88997e-06	UP	no	NO
AT5G43170	1.56366	0.140212	3.83372e-07	8.88997e-06	UP	no	NO
AT5G43750	-0.508773	6.64523	3.83437e-07	8.88997e-06	DOWN	no	NO
AT5G49080	1.91474	2.23535	3.8403e-07	8.88997e-06	UP	no	NO
AT1G31600	-0.529625	5.14804	3.84109e-07	8.88997e-06	DOWN	no	NO
AT4G02100	1.05666	3.49452	3.84175e-07	8.88997e-06	UP	no	NO
AT2G27402	1.29619	2.87231	3.84568e-07	8.88997e-06	UP	no	NO
AT5G01730	0.701336	4.48754	3.84569e-07	8.88997e-06	UP	no	NO
AT5G54130	-0.835244	3.76673	3.84887e-07	8.8912e-06	DOWN	no	NO
AT4G37925	-0.628957	6.72911	3.89475e-07	8.99103e-06	DOWN	no	NO
AT2G46660	-1.28232	2.47073	3.91386e-07	9.02896e-06	DOWN	no	NO
AT2G45940	3.0058	-2.66518	3.92889e-07	9.05741e-06	UP	no	NO
AT5G11850	0.589881	5.11896	3.94753e-07	9.09418e-06	UP	no	NO
AT1G50010	0.634933	8.05767	3.96201e-07	9.12129e-06	UP	no	NO
AT5G67420	-0.535855	6.90626	3.99133e-07	9.18251e-06	DOWN	no	NO
AT5G47200	0.486469	5.93757	3.99871e-07	9.1932e-06	UP	no	NO
AT4G02370	0.622708	5.18405	4.02588e-07	9.24936e-06	UP	no	NO
AT1G19380	1.53248	2.17397	4.06407e-07	9.33075e-06	UP	no	NO
AT2G37060	0.892162	2.33667	4.0766e-07	9.35313e-06	UP	no	NO
AT2G23910	2.11049	-1.2091	4.09033e-07	9.37824e-06	UP	no	NO
AT3G43810	0.546666	5.95892	4.10379e-07	9.40271e-06	UP	no	NO
AT1G20090	0.612707	5.9136	4.1777e-07	9.56554e-06	UP	no	NO
AT4G13670	-0.542693	6.21744	4.18423e-07	9.57399e-06	DOWN	no	NO
AT1G71480	-0.591884	5.68972	4.19911e-07	9.60151e-06	DOWN	no	NO
AT2G42380	0.878229	4.70679	4.21039e-07	9.62076e-06	UP	no	NO
AT3G52340	0.536793	7.78398	4.24978e-07	9.70418e-06	UP	no	NO
AT5G18770	0.652308	3.81498	4.25642e-07	9.71277e-06	UP	no	NO
AT3G62250	0.528206	7.86919	4.28396e-07	9.76899e-06	UP	no	NO
AT1G66100	-1.99308	1.80366	4.29832e-07	9.7924e-06	DOWN	no	NO
AT1G22470	2.017	-0.0321753	4.30004e-07	9.7924e-06	UP	no	NO
AT3G22880	0.991039	3.24016	4.34338e-07	9.88441e-06	UP	no	NO
AT2G47510	0.532582	6.29505	4.36894e-07	9.93588e-06	UP	no	NO
AT1G15010	1.11014	1.63555	4.38238e-07	9.95971e-06	UP	no	NO
AT2G27880	2.60479	-2.21763	4.39654e-07	9.98517e-06	UP	no	NO
AT1G72750	0.555055	5.71462	4.41473e-07	1.00197e-05	UP	no	NO
AT3G21060	0.593992	4.04302	4.45233e-07	1.00982e-05	UP	no	NO
AT5G56280	0.509628	4.62562	4.47945e-07	1.01529e-05	UP	no	NO
AT1G20610	1.23334	3.41297	4.48827e-07	1.01661e-05	UP	no	NO
AT5G61900	0.888097	3.64755	4.50315e-07	1.0186e-05	UP	no	NO
AT3G11670	-0.552905	6.3972	4.50599e-07	1.0186e-05	DOWN	no	NO
AT1G20510	1.73294	4.72667	4.50614e-07	1.0186e-05	UP	no	NO
AT3G07530	0.754606	3.06121	4.51552e-07	1.02004e-05	UP	no	NO
AT1G61667	1.44022	2.13716	4.5204e-07	1.02045e-05	UP	no	NO
AT2G25800	0.528374	5.71021	4.54482e-07	1.02528e-05	UP	no	NO
AT3G48870	0.52328	7.4902	4.62758e-07	1.04325e-05	UP	no	NO
AT1G34570	-0.65415	4.2158	4.63162e-07	1.04327e-05	DOWN	no	NO
AT4G17150	0.598026	4.41932	4.63385e-07	1.04327e-05	UP	no	NO
AT3G48530	0.519891	6.9504	4.69653e-07	1.05667e-05	UP	no	NO
AT5G63420	0.581303	5.08613	4.73266e-07	1.06409e-05	UP	no	NO
AT2G07690	0.737701	3.66848	4.76739e-07	1.07118e-05	UP	no	NO
AT5G01790	-1.38877	2.53425	4.79203e-07	1.0753e-05	DOWN	no	NO
AT3G48490	1.19913	0.943051	4.79208e-07	1.0753e-05	UP	no	NO
AT5G08300	0.551503	5.26286	4.8001e-07	1.07638e-05	UP	no	NO
AT4G05380	3.47179	-1.98267	4.85742e-07	1.08851e-05	UP	no	NO
AT1G64200	0.700784	4.75553	4.91985e-07	1.1014e-05	UP	no	NO
AT4G25200	3.75599	-1.24619	4.9215e-07	1.1014e-05	UP	no	NO
AT1G29630	0.857296	2.95077	4.96237e-07	1.10981e-05	UP	no	NO
AT4G02350	0.583264	5.14642	4.97981e-07	1.11297e-05	UP	no	NO
AT1G67600	-0.966343	2.01323	5.05177e-07	1.12831e-05	DOWN	no	NO
AT2G46830	-0.994636	7.39916	5.07374e-07	1.13246e-05	DOWN	no	NO
AT1G57680	0.925466	6.22806	5.10069e-07	1.13773e-05	UP	no	NO
AT5G08330	0.803329	5.68808	5.13345e-07	1.14427e-05	UP	no	NO
AT3G51550	0.601015	7.64456	5.14346e-07	1.14575e-05	UP	no	NO
AT5G35190	1.50975	2.77372	5.1786e-07	1.15281e-05	UP	no	NO
AT3G55010	0.667942	4.25278	5.21024e-07	1.15909e-05	UP	no	NO
AT1G69550	-0.497169	4.93476	5.26069e-07	1.16954e-05	DOWN	no	NO
AT1G49410	0.669218	4.33107	5.26791e-07	1.17037e-05	UP	no	NO
AT1G48120	-0.793901	3.51283	5.28105e-07	1.17252e-05	DOWN	no	NO
AT5G20720	0.577234	8.53741	5.28455e-07	1.17252e-05	UP	no	NO
AT4G21100	0.530266	4.91919	5.3388e-07	1.18378e-05	UP	no	NO
AT3G51480	-0.663739	3.60146	5.36512e-07	1.18883e-05	DOWN	no	NO
AT1G03190	0.608555	3.97423	5.44752e-07	1.20476e-05	UP	no	NO
AT1G12780	0.640302	7.24552	5.44823e-07	1.20476e-05	UP	no	NO
AT2G01480	0.584457	4.58793	5.45026e-07	1.20476e-05	UP	no	NO
AT1G12270	0.495439	5.35662	5.45128e-07	1.20476e-05	UP	no	NO
AT4G32520	0.585689	6.14303	5.48003e-07	1.20976e-05	UP	no	YES	4:15692443:AAT-A;intronic_variant
AT3G54100	0.627378	4.0634	5.4811e-07	1.20976e-05	UP	no	NO
AT3G08020	0.497041	5.5222	5.5311e-07	1.21999e-05	UP	no	NO
AT5G46610	2.69733	-2.29504	5.60292e-07	1.23503e-05	UP	no	NO
AT1G17050	-0.701688	5.7374	5.6069e-07	1.23509e-05	DOWN	no	NO
AT1G07010	-0.752125	6.691	5.64933e-07	1.24301e-05	DOWN	no	NO
AT4G38320	-0.568078	3.97698	5.65019e-07	1.24301e-05	DOWN	no	NO
AT3G52720	-0.870426	5.36003	5.66401e-07	1.24523e-05	DOWN	no	NO
AT1G52940	-9.37264	-0.400368	5.66857e-07	1.24542e-05	DOWN	no	YES	1:19718935:G-GA;intronic_variant
AT5G57320	0.823372	2.6556	5.71952e-07	1.2558e-05	UP	no	NO
AT1G25260	0.509123	5.48971	5.81503e-07	1.27594e-05	UP	no	NO
AT4G14400	-3.09936	2.78364	5.83671e-07	1.27986e-05	DOWN	no	NO
AT1G29910	-0.584854	12.6865	5.8697e-07	1.28625e-05	DOWN	no	NO
AT1G19530	1.43638	4.35382	5.87424e-07	1.28641e-05	UP	no	NO
AT5G04800	0.563212	5.71912	5.89152e-07	1.28868e-05	UP	no	NO
AT1G76090	0.958193	5.26017	5.89224e-07	1.28868e-05	UP	no	NO
AT2G11810	-4.71286	2.05721	5.91982e-07	1.29387e-05	DOWN	no	NO
AT1G32160	-0.462716	6.55931	5.93192e-07	1.29502e-05	DOWN	no	NO
AT1G17710	-5.22345	3.54886	5.93275e-07	1.29502e-05	DOWN	no	NO
AT4G33650	0.477098	5.36455	5.98222e-07	1.30497e-05	UP	no	NO
AT5G65390	1.64813	4.00472	5.99556e-07	1.30703e-05	UP	no	NO
AT1G25430	2.34342	-2.1742	6.00923e-07	1.30916e-05	UP	no	NO
AT5G50850	0.456728	6.89643	6.03046e-07	1.31234e-05	UP	no	NO
AT3G43300	0.540373	7.09193	6.03159e-07	1.31234e-05	UP	no	NO
AT2G20420	0.470567	6.68578	6.05771e-07	1.31717e-05	UP	no	NO
AT1G02090	0.530648	4.78561	6.09556e-07	1.32454e-05	UP	no	NO
AT3G60400	-0.778438	2.7949	6.18174e-07	1.34241e-05	DOWN	no	NO
AT3G21040	-3.88326	-2.6111	6.26331e-07	1.35924e-05	DOWN	no	NO
AT5G20600	0.574124	4.29724	6.28475e-07	1.36278e-05	UP	no	NO
AT2G14060	-2.79971	-1.50002	6.28768e-07	1.36278e-05	DOWN	no	NO
AT3G17970	0.487168	5.27457	6.33041e-07	1.37115e-05	UP	no	NO
AT1G75190	0.746881	3.81369	6.35062e-07	1.37403e-05	UP	no	NO
AT5G28050	0.538255	6.14811	6.35537e-07	1.37403e-05	UP	no	NO
AT5G48450	1.03707	2.93759	6.35593e-07	1.37403e-05	UP	no	NO
AT2G22240	-0.547376	5.9424	6.38581e-07	1.37961e-05	DOWN	no	NO
AT1G59780	2.40327	-0.589439	6.46994e-07	1.39689e-05	UP	no	NO
AT3G11910	0.460996	6.96879	6.49418e-07	1.40122e-05	UP	no	NO
AT1G13650	-1.27792	5.11506	6.54112e-07	1.41045e-05	DOWN	no	NO
AT2G36620	0.534131	6.50817	6.67173e-07	1.43769e-05	UP	no	NO
AT3G16740	0.689613	4.28775	6.6862e-07	1.43988e-05	UP	no	NO
AT4G05180	-0.469712	10.6585	6.69719e-07	1.44133e-05	DOWN	no	NO
AT2G18410	0.636499	3.64116	6.71773e-07	1.44483e-05	UP	no	NO
AT1G16540	0.546859	4.35835	6.72304e-07	1.44505e-05	UP	no	YES	1:5663555:C-T;intronic_variant
AT4G14490	0.948043	2.76376	6.72867e-07	1.44533e-05	UP	no	NO
AT4G04670	0.790107	3.09547	6.74571e-07	1.44807e-05	UP	no	YES	4:2371208:C-T;protein_coding;missense;CCA>CTA;P>L
AT3G10410	0.54124	6.11928	6.87647e-07	1.4752e-05	UP	no	NO
AT2G25735	1.94371	0.885869	6.90585e-07	1.47964e-05	UP	no	NO
AT3G46880	1.83204	-1.03247	6.90596e-07	1.47964e-05	UP	no	NO
AT5G06110	0.501851	5.7114	6.93272e-07	1.48443e-05	UP	no	NO
AT1G80240	1.80327	3.14136	6.94303e-07	1.48569e-05	UP	no	NO
AT3G24550	0.761804	5.95004	6.97139e-07	1.49081e-05	UP	no	NO
AT2G38210	-1.01717	3.06649	7.03052e-07	1.50251e-05	DOWN	no	NO
AT5G23920	-0.699904	5.79157	7.08268e-07	1.51269e-05	DOWN	no	NO
ATMG00090	1.26549	1.02224	7.10842e-07	1.51723e-05	UP	no	NO
AT4G30470	0.745407	5.20889	7.14572e-07	1.52422e-05	UP	no	NO
AT3G05560	0.624035	6.45298	7.21015e-07	1.53699e-05	UP	no	NO
AT1G32640	1.14752	6.14259	7.30154e-07	1.55549e-05	UP	no	NO
AT4G23430	-0.596577	5.42288	7.32483e-07	1.55901e-05	DOWN	no	NO
AT3G20470	1.42482	4.38198	7.33095e-07	1.55901e-05	UP	no	NO
AT5G51660	0.557115	5.26266	7.33194e-07	1.55901e-05	UP	yes	NO
AT1G07930	0.605883	8.21841	7.40613e-07	1.57379e-05	UP	no	NO
AT4G26910	0.534819	5.17774	7.41997e-07	1.57574e-05	UP	no	NO
AT5G46110	-0.474431	10.6549	7.45562e-07	1.58231e-05	DOWN	no	NO
AT1G33760	3.3648	-1.28382	7.46251e-07	1.58278e-05	UP	no	NO
AT3G49240	0.755576	3.22713	7.5032e-07	1.58943e-05	UP	no	NO
AT5G66052	0.864453	5.05936	7.50334e-07	1.58943e-05	UP	no	NO
AT3G13438	0.995304	1.95068	7.51517e-07	1.59094e-05	UP	no	NO
AT5G11170	0.466895	7.63697	7.52751e-07	1.59255e-05	UP	yes	NO
AT4G28030	-0.479039	6.41364	7.53386e-07	1.59289e-05	DOWN	no	NO
AT5G05600	2.15353	4.49631	7.58454e-07	1.6026e-05	UP	no	NO
AT2G01930	0.497622	5.5037	7.59864e-07	1.60458e-05	UP	no	NO
AT2G41290	-0.801513	3.9336	7.60885e-07	1.60572e-05	DOWN	no	YES	2:17212590:G-A;intronic_variant
AT3G54750	0.667646	3.95142	7.6494e-07	1.61327e-05	UP	no	NO
AT5G44260	0.751239	6.95693	7.76466e-07	1.63556e-05	UP	no	NO
AT4G27830	-0.735113	5.78805	7.76477e-07	1.63556e-05	DOWN	no	NO
AT5G16120	0.478044	6.20925	7.79201e-07	1.6398e-05	UP	no	NO
AT5G51530	-2.87773	-1.67295	7.79466e-07	1.6398e-05	DOWN	no	NO
AT4G01580	0.916292	2.65622	7.87803e-07	1.6563e-05	UP	no	NO
AT1G25380	0.532875	4.69294	7.88505e-07	1.65675e-05	UP	no	NO
AT5G07010	2.00703	3.77965	7.93158e-07	1.66548e-05	UP	no	NO
AT1G01510	0.480264	5.54883	7.96163e-07	1.67075e-05	UP	no	NO
AT3G62120	0.46514	6.47392	7.98131e-07	1.67384e-05	UP	no	NO
AT3G53110	0.484971	6.2714	8.04967e-07	1.68713e-05	UP	no	NO
AT1G01030	-0.919842	2.50106	8.0813e-07	1.6927e-05	DOWN	no	NO
AT1G72520	2.44826	2.76373	8.1556e-07	1.7072e-05	UP	no	NO
AT3G10710	1.64572	1.96565	8.1931e-07	1.71399e-05	UP	no	NO
AT1G21610	0.478087	5.52932	8.22528e-07	1.7191e-05	UP	no	NO
AT5G13220	2.74564	3.47565	8.22777e-07	1.7191e-05	UP	no	NO
AT1G75460	-0.775274	7.3779	8.265e-07	1.72581e-05	DOWN	no	NO
AT4G33430	0.601417	5.39342	8.3029e-07	1.73265e-05	UP	no	NO
AT1G75800	0.644125	6.87971	8.34245e-07	1.73983e-05	UP	no	NO
AT1G02620	1.73233	1.43544	8.40201e-07	1.75116e-05	UP	no	NO
AT3G52070	0.732638	4.03397	8.44277e-07	1.75857e-05	UP	no	NO
AT4G29110	-1.22533	2.64963	8.49993e-07	1.76938e-05	DOWN	no	NO
AT1G15420	0.692904	3.72952	8.5665e-07	1.78106e-05	UP	no	NO
AT1G48930	1.6238	2.80656	8.5666e-07	1.78106e-05	UP	no	NO
AT5G66270	-1.03003	1.51846	8.65276e-07	1.79786e-05	DOWN	no	YES	5:26475248:G-GA;intronic_variant
AT2G44860	0.531433	5.0048	8.7088e-07	1.80839e-05	UP	no	NO
AT2G02560	0.471596	5.96643	8.74164e-07	1.81409e-05	UP	no	NO
AT1G10650	-0.63636	4.20445	8.82489e-07	1.83024e-05	DOWN	no	NO
AT1G27470	0.637609	4.05625	8.83243e-07	1.83068e-05	UP	no	NO
AT1G15940	0.478132	5.71178	8.85293e-07	1.8338e-05	UP	no	YES	1:5476207:C-T;protein_coding;missense;CAT>TAT;H>Y
AT2G27080	1.26974	2.21286	8.90712e-07	1.8434e-05	UP	no	YES	2:11567247:A-AT;exonic_variant
AT3G02090	0.433729	7.59838	8.91022e-07	1.8434e-05	UP	no	NO
AT3G20010	0.636716	4.43062	8.93967e-07	1.84734e-05	UP	no	NO
AT1G65330	2.99435	-1.32155	8.94025e-07	1.84734e-05	UP	no	NO
AT1G27460	0.735947	4.48915	8.95445e-07	1.84914e-05	UP	no	NO
AT1G53130	2.35496	-0.855877	8.99815e-07	1.85703e-05	UP	no	NO
AT4G25300	-0.713814	3.97817	9.01313e-07	1.85898e-05	DOWN	no	NO
AT5G40920	0.672022	4.09549	9.04877e-07	1.86519e-05	UP	no	NO
AT3G56040	-0.494933	6.96413	9.11896e-07	1.87851e-05	DOWN	no	YES	3:20795012:T-C;exonic_variant,3:20795012:T-C;protein_coding;missense;GAT>GGT;D>G,3:20795011:A-T;exonic_variant,3:20795011:A-T;protein_coding;missense;GAT>GAA;D>E
AT4G35240	0.587119	4.35858	9.13117e-07	1.87987e-05	UP	no	NO
AT2G39460	0.593946	7.63074	9.34237e-07	1.92218e-05	UP	no	NO
AT5G60040	0.674335	3.79472	9.35392e-07	1.92338e-05	UP	no	NO
AT4G37450	1.32262	3.44324	9.3735e-07	1.92623e-05	UP	no	NO
AT1G07940	0.547091	8.65837	9.3838e-07	1.92717e-05	UP	no	NO
AT2G42310	0.551274	5.43452	9.40533e-07	1.93041e-05	UP	no	NO
AT1G23360	-0.574687	4.35999	9.45565e-07	1.93956e-05	DOWN	no	NO
AT2G38980	-0.583739	4.77	9.49524e-07	1.94649e-05	DOWN	no	NO
AT2G45030	0.643754	4.93217	9.56227e-07	1.95904e-05	UP	no	NO
AT2G32300	1.17532	2.4546	9.59185e-07	1.96391e-05	UP	no	NO
AT2G42030	0.516067	5.39323	9.61297e-07	1.96704e-05	UP	no	NO
AT2G39730	-0.52191	12.87	9.65382e-07	1.9742e-05	DOWN	no	YES	2:16572026:GCTGCAAAAAGATTCAAACTTTTTTAGATTCTTGTCGAAAGAGAGCTAAACAGAAACCGGGTCAAGATCGGAGATTTGGGAAATGGACTCAC-G;intronic_variant&splice_acceptor_region_variant&splice_donor_region_variant&splice_acceptor_variant&splice_donor_variant,2:16572405:GTACCTATATTTCAAGAAGTAAAGACAATTTTTAAAACCAAAGACTCCAAAATCTTTATGGAACTAATGAGAGATCTAGAGAGATGAGAACT-G;intronic_variant&splice_donor_region_variant&splice_acceptor_regio…
AT3G48610	-0.561678	5.79099	9.71564e-07	1.98563e-05	DOWN	no	NO
AT3G48340	1.83887	3.83367	9.73674e-07	1.98874e-05	UP	no	NO
AT3G03440	-0.935347	2.87886	9.76584e-07	1.99347e-05	DOWN	no	NO
AT2G39390	0.542925	5.35888	9.79682e-07	1.99859e-05	UP	no	NO
AT4G31310	-0.51088	4.97598	9.99022e-07	2.03597e-05	DOWN	no	NO
AT4G31470	2.74594	0.0249455	9.99216e-07	2.03597e-05	UP	no	NO
AT4G36730	0.481881	6.77622	1.00469e-06	2.04589e-05	UP	no	NO
AT1G09660	0.576915	4.66586	1.00704e-06	2.04924e-05	UP	no	NO
AT5G01330	2.1019	-0.149048	1.00756e-06	2.04924e-05	UP	no	NO
AT5G19310	0.584445	4.68532	1.00824e-06	2.04941e-05	UP	no	NO
AT4G21650	-1.23488	6.06105	1.01064e-06	2.05304e-05	DOWN	no	NO
AT1G05575	1.39279	0.39907	1.01496e-06	2.06057e-05	UP	no	NO
AT4G01560	0.570958	4.0652	1.02408e-06	2.07784e-05	UP	no	NO
AT5G18245	-0.534209	4.46548	1.03471e-06	2.09814e-05	DOWN	no	NO
AT4G14320	0.53389	6.45468	1.04e-06	2.10759e-05	UP	no	NO
AT5G38990	-0.563939	5.06414	1.05488e-06	2.13646e-05	DOWN	no	NO
AT4G24270	0.56998	4.33552	1.06039e-06	2.14634e-05	UP	yes	NO
AT5G39550	0.807823	2.9673	1.06361e-06	2.15155e-05	UP	no	NO
AT5G06690	0.814744	5.21777	1.0655e-06	2.15409e-05	UP	no	NO
AT3G55980	1.33437	5.7935	1.06673e-06	2.15527e-05	UP	no	NO
AT2G40000	1.14852	8.65069	1.07784e-06	2.17641e-05	UP	no	NO
AT1G73230	0.499721	6.74254	1.09295e-06	2.20562e-05	UP	no	NO
AT2G26511	-1.13077	1.04418	1.09456e-06	2.20753e-05	DOWN	no	NO
AT5G48540	-1.06519	2.90079	1.09787e-06	2.21289e-05	DOWN	no	NO
AT3G05630	-1.74897	2.97215	1.11194e-06	2.2399e-05	DOWN	no	NO
AT1G75280	-1.17172	6.00573	1.11405e-06	2.24282e-05	DOWN	no	NO
AT3G58270	0.999514	1.47885	1.11659e-06	2.24658e-05	UP	no	NO
AT5G24240	1.7659	-1.13084	1.11829e-06	2.24866e-05	UP	no	NO
AT2G23460	0.46981	5.75227	1.119e-06	2.24874e-05	UP	no	NO
AT5G43690	1.49555	-0.0206898	1.12348e-06	2.25641e-05	UP	no	NO
AT1G22920	0.50751	4.5789	1.13113e-06	2.27007e-05	UP	no	NO
AT5G04880	-0.628087	3.67838	1.13163e-06	2.27007e-05	DOWN	no	NO
AT2G26750	1.10621	0.652481	1.13431e-06	2.27409e-05	UP	no	NO
AT1G74450	0.749108	3.35774	1.1398e-06	2.28373e-05	UP	no	NO
AT3G26070	-0.473187	7.46774	1.14182e-06	2.28643e-05	DOWN	no	NO
AT1G54090	0.522282	4.81967	1.14526e-06	2.29195e-05	UP	no	NO
AT5G07440	1.07383	7.49765	1.14969e-06	2.29856e-05	UP	no	YES	5:2357254:G-A;intronic_variant,5:2357254:G-A;splice_acceptor_region_variant&protein_coding;missense;GGT>GAT;G>D,5:2357254:G-A;splice_acceptor_region_variant
AT4G26010	1.4539	3.32294	1.14993e-06	2.29856e-05	UP	no	NO
AT5G04250	0.800673	2.90378	1.15938e-06	2.31607e-05	UP	no	NO
AT5G40040	3.21519	-2.836	1.16377e-06	2.32348e-05	UP	no	NO
AT5G20820	1.92327	0.0494759	1.17462e-06	2.34373e-05	UP	no	NO
AT2G37560	1.27797	0.344992	1.17662e-06	2.34634e-05	UP	no	NO
AT3G61060	0.822244	6.40478	1.18182e-06	2.35438e-05	UP	no	NO
ATMG00590	1.50594	1.26081	1.18205e-06	2.35438e-05	UP	no	NO
AT3G51910	0.889698	2.95217	1.18918e-06	2.36719e-05	UP	no	NO
AT3G21180	1.75253	0.465252	1.19184e-06	2.37108e-05	UP	no	NO
AT5G58450	0.464705	5.17555	1.19597e-06	2.3779e-05	UP	no	NO
AT3G45890	0.646553	3.90549	1.19939e-06	2.38329e-05	UP	no	NO
AT3G15760	-0.831699	4.24647	1.20495e-06	2.39293e-05	DOWN	no	NO
AT1G15860	0.491993	5.08856	1.21156e-06	2.40463e-05	UP	no	NO
AT1G58848	-0.465772	7.15819	1.21947e-06	2.4189e-05	DOWN	no	NO
AT4G36410	0.830482	3.85321	1.23103e-06	2.4404e-05	UP	no	NO
AT5G67350	-0.791716	2.59095	1.24707e-06	2.46993e-05	DOWN	no	NO
AT2G47990	0.818068	2.84318	1.24739e-06	2.46993e-05	UP	no	NO
AT4G16720	0.520004	7.48325	1.25509e-06	2.48371e-05	UP	no	NO
AT5G42970	0.504232	4.62598	1.26252e-06	2.49695e-05	UP	no	NO
AT3G47340	0.972575	9.67336	1.26406e-06	2.49852e-05	UP	no	NO
AT4G15160	2.55998	3.06271	1.2693e-06	2.50741e-05	UP	no	NO
AT3G04600	0.524905	4.98046	1.27926e-06	2.5256e-05	UP	no	NO
AT5G13740	0.926267	5.97341	1.28371e-06	2.53291e-05	UP	no	NO
AT4G25280	-0.643094	4.38061	1.28564e-06	2.53522e-05	DOWN	no	NO
AT4G30420	2.05346	0.216895	1.29201e-06	2.54629e-05	UP	no	NO
AT2G21960	-0.527872	6.71047	1.29307e-06	2.54689e-05	DOWN	no	NO
AT1G61500	-0.801558	3.53571	1.29577e-06	2.55073e-05	DOWN	no	NO
AT4G16620	1.17776	0.874305	1.30196e-06	2.56141e-05	UP	no	NO
AT4G18100	0.54982	7.5359	1.31899e-06	2.59339e-05	UP	no	NO
AT3G49180	0.768965	3.17531	1.32429e-06	2.6003e-05	UP	no	NO
AT2G18740	0.507097	4.75503	1.32453e-06	2.6003e-05	UP	yes	NO
AT5G02290	0.535887	5.15943	1.32481e-06	2.6003e-05	UP	no	NO
AT2G05910	1.18999	0.400113	1.32679e-06	2.60266e-05	UP	no	NO
AT4G31320	1.84641	0.588389	1.33711e-06	2.62138e-05	UP	no	NO
AT2G45630	-0.733497	3.6217	1.3477e-06	2.6406e-05	DOWN	no	NO
AT1G69730	-1.07637	3.63582	1.40404e-06	2.74939e-05	DOWN	no	NO
AT3G18070	-1.12793	1.86484	1.41741e-06	2.77395e-05	DOWN	no	NO
AT3G12270	0.888251	3.10994	1.41926e-06	2.77596e-05	UP	no	NO
AT3G19550	-2.25444	0.52249	1.42277e-06	2.7809e-05	DOWN	no	NO
AT1G16489	-1.05638	1.25722	1.42343e-06	2.7809e-05	DOWN	no	NO
AT2G46290	0.866095	2.28972	1.42653e-06	2.78533e-05	UP	no	NO
AT4G04720	0.449047	5.74027	1.42853e-06	2.78762e-05	UP	no	NO
AT4G21680	-1.43122	1.6186	1.45045e-06	2.82876e-05	DOWN	no	NO
AT2G48010	0.720223	3.30747	1.47332e-06	2.8717e-05	UP	no	NO
AT2G33570	1.11754	3.97374	1.48242e-06	2.88776e-05	UP	no	NO
AT2G15430	0.621641	4.19983	1.48421e-06	2.88958e-05	UP	no	NO
AT5G52470	0.604766	6.79089	1.48507e-06	2.88958e-05	UP	no	NO
AT5G61670	-0.44868	6.85461	1.49314e-06	2.90361e-05	DOWN	no	NO
AT4G25890	0.671622	4.81274	1.50099e-06	2.91719e-05	UP	no	NO
AT3G21755	-1.00342	3.33311	1.50602e-06	2.92528e-05	DOWN	no	NO
AT3G53470	-0.498104	5.64394	1.51677e-06	2.94446e-05	DOWN	no	NO
AT3G19320	3.03528	-0.78824	1.52281e-06	2.95448e-05	UP	no	NO
AT3G20140	2.56119	-2.29621	1.55567e-06	3.01649e-05	UP	no	NO
AT5G58420	0.479023	6.76833	1.55946e-06	3.0221e-05	UP	no	NO
AT1G05900	-0.489948	4.8995	1.57058e-06	3.04189e-05	DOWN	no	NO
AT2G47610	0.516138	7.76275	1.58197e-06	3.0622e-05	UP	no	NO
AT4G31351	-1.02492	2.11871	1.58653e-06	3.06763e-05	DOWN	no	NO
AT2G27420	-2.56547	1.50286	1.5866e-06	3.06763e-05	DOWN	no	NO
AT1G70980	0.539724	4.82886	1.58935e-06	3.0712e-05	UP	no	NO
AT4G17710	4.43293	-2.95804	1.59616e-06	3.08259e-05	UP	no	NO
AT4G38440	0.604751	4.41446	1.59754e-06	3.08348e-05	UP	no	NO
AT1G23290	0.559904	6.94106	1.62089e-06	3.12676e-05	UP	no	NO
AT3G18950	-0.968612	3.59059	1.6251e-06	3.13189e-05	DOWN	no	NO
AT5G06290	-0.426886	7.51254	1.62541e-06	3.13189e-05	DOWN	no	NO
AT3G61140	0.477778	4.82802	1.62774e-06	3.13459e-05	UP	no	NO
AT4G33865	0.526156	6.35394	1.62962e-06	3.13641e-05	UP	no	NO
AT3G21750	-0.530611	4.61271	1.63491e-06	3.14481e-05	DOWN	no	NO
AT1G71280	2.29634	-1.48558	1.64283e-06	3.15822e-05	UP	no	NO
AT5G13760	0.700271	4.20273	1.64681e-06	3.16408e-05	UP	no	NO
AT4G28450	0.656521	3.68548	1.65319e-06	3.17452e-05	UP	no	NO
AT4G12800	-0.420821	11.6333	1.65972e-06	3.18524e-05	DOWN	no	NO
AT5G44520	-0.471425	5.43787	1.6822e-06	3.22656e-05	DOWN	no	NO
AT2G37025	0.998348	4.03598	1.68708e-06	3.23406e-05	UP	no	NO
AT5G40490	0.58486	4.66086	1.69446e-06	3.24636e-05	UP	no	NO
AT3G62870	0.549357	8.20348	1.70334e-06	3.26152e-05	UP	no	NO
AT1G49530	1.3762	1.89517	1.70567e-06	3.26335e-05	UP	no	NO
AT2G24970	1.1516	0.650845	1.70623e-06	3.26335e-05	UP	no	NO
AT3G46210	0.692895	3.68861	1.70917e-06	3.26712e-05	UP	yes	NO
AT3G04320	2.30083	0.563043	1.71283e-06	3.27225e-05	UP	no	NO
AT1G80750	0.527884	4.77503	1.72156e-06	3.28707e-05	UP	no	NO
AT2G01180	0.928864	3.69438	1.74299e-06	3.3261e-05	UP	no	NO
AT5G65430	0.459126	6.7572	1.75229e-06	3.34195e-05	UP	no	NO
AT1G29660	0.845245	5.49163	1.76459e-06	3.36351e-05	UP	no	YES	1:10373778:G-GT;exonic_variant
AT4G36220	-0.63257	6.61539	1.78059e-06	3.39209e-05	DOWN	no	NO
AT5G56100	0.776599	5.09392	1.79119e-06	3.41034e-05	UP	no	NO
AT5G04420	0.490603	5.14105	1.79259e-06	3.41108e-05	UP	no	NO
AT3G25870	-1.21455	1.89291	1.8009e-06	3.42497e-05	DOWN	no	NO
AT5G10830	1.21277	2.09755	1.81056e-06	3.44139e-05	UP	no	NO
AT4G01670	1.05517	2.38789	1.81754e-06	3.45271e-05	UP	no	YES	4:712350:C-T;protein_coding;sense;GGG>GGA;G>G
AT2G32500	-0.637993	5.07785	1.82259e-06	3.46036e-05	DOWN	no	NO
AT2G35960	-0.764418	3.44237	1.82413e-06	3.46133e-05	DOWN	no	NO
AT5G09890	0.584642	5.32981	1.84123e-06	3.49181e-05	UP	no	NO
AT3G52780	2.03637	-1.1262	1.84351e-06	3.49342e-05	UP	no	NO
AT1G69900	1.09947	1.87292	1.84415e-06	3.49342e-05	UP	no	NO
AT5G51200	0.586368	6.40622	1.84631e-06	3.49553e-05	UP	no	NO
AT1G27300	0.528648	4.8417	1.84833e-06	3.4974e-05	UP	no	NO
AT4G23840	0.701949	3.34963	1.85679e-06	3.51142e-05	UP	no	NO
AT5G64220	0.461713	5.39588	1.86012e-06	3.51575e-05	UP	no	NO
AT3G06330	-0.490717	4.84728	1.87124e-06	3.53284e-05	DOWN	no	NO
AT3G20710	2.15355	-1.59671	1.87126e-06	3.53284e-05	UP	no	NO
AT5G41190	0.509988	4.68957	1.87715e-06	3.54198e-05	UP	no	NO
AT1G56300	0.773079	4.51669	1.89467e-06	3.57303e-05	UP	no	NO
AT3G55510	0.74225	3.14009	1.90282e-06	3.58639e-05	UP	no	NO
AT1G53580	0.497873	7.41069	1.90515e-06	3.58879e-05	UP	no	NO
AT1G05170	-0.7751	4.31488	1.91883e-06	3.61254e-05	DOWN	no	NO
AT1G49600	0.544365	6.07521	1.93388e-06	3.63882e-05	UP	no	NO
AT1G11740	1.86154	-0.888772	1.94523e-06	3.65814e-05	UP	no	NO
AT1G64780	-1.12133	4.4398	1.95745e-06	3.67906e-05	DOWN	no	NO
AT4G22240	-0.529522	7.91041	1.98454e-06	3.7279e-05	DOWN	no	NO
AT3G59540	0.511206	6.35558	1.99869e-06	3.75239e-05	UP	no	NO
AT2G36050	0.840343	3.48233	2.00219e-06	3.75687e-05	UP	no	NO
AT1G03457	0.977398	2.80198	2.00979e-06	3.76829e-05	UP	yes	YES	1:863646:G-GA;intronic_variant,1:863622:G-GA;intronic_variant,1:863622:G-GA;exonic_variant,1:863646:G-GA;exonic_variant
AT2G22400	0.468088	5.49343	2.01052e-06	3.76829e-05	UP	no	NO
AT5G25440	1.33412	1.78746	2.01962e-06	3.78325e-05	UP	no	NO
AT4G40000	1.06692	1.55547	2.02128e-06	3.78425e-05	UP	no	NO
AT1G68540	-0.702982	3.08886	2.03519e-06	3.80818e-05	DOWN	no	NO
AT2G01140	0.505702	6.98321	2.05213e-06	3.83775e-05	UP	no	NO
AT2G04850	-0.787727	3.30453	2.06311e-06	3.85615e-05	DOWN	no	NO
AT1G64950	-0.495834	6.36168	2.07005e-06	3.86697e-05	DOWN	no	NO
AT4G37930	-0.508289	10.8837	2.08596e-06	3.89389e-05	DOWN	no	NO
AT5G09930	-1.47924	3.64324	2.08677e-06	3.89389e-05	DOWN	no	NO
AT4G30760	0.436063	5.67363	2.08946e-06	3.89674e-05	UP	no	NO
AT5G18150	0.837453	2.32697	2.10596e-06	3.92534e-05	UP	no	NO
AT4G30910	0.5038	4.96545	2.11787e-06	3.94536e-05	UP	no	NO
AT1G02360	1.32157	1.35062	2.11981e-06	3.94678e-05	UP	no	NO
AT3G02720	-0.489487	6.19369	2.12118e-06	3.94715e-05	DOWN	no	NO
AT2G23100	1.00792	2.34582	2.13045e-06	3.96222e-05	UP	no	NO
AT1G20010	0.542825	7.24763	2.13265e-06	3.96407e-05	UP	no	NO
AT4G35320	0.813577	3.87949	2.1338e-06	3.96407e-05	UP	no	NO
AT3G20630	0.454855	5.68442	2.14529e-06	3.98321e-05	UP	no	NO
AT1G47580	-0.693716	4.51516	2.14731e-06	3.98476e-05	DOWN	no	NO
AT3G19850	0.52466	5.23877	2.1575e-06	4.00147e-05	UP	no	NO
AT5G20170	0.492468	4.43827	2.15984e-06	4.00361e-05	UP	no	NO
AT1G18080	0.526883	7.86997	2.16157e-06	4.00461e-05	UP	yes	NO
AT1G09590	0.497537	6.4314	2.16441e-06	4.00766e-05	UP	no	NO
AT3G50700	0.652126	4.11599	2.16946e-06	4.01482e-05	UP	no	NO
AT5G56170	0.518298	5.64273	2.18003e-06	4.03215e-05	UP	no	NO
AT5G62040	-2.36028	0.588726	2.18891e-06	4.04636e-05	DOWN	no	NO
AT4G34350	-0.461	9.23414	2.20078e-06	4.06607e-05	DOWN	no	NO
AT1G69280	0.860587	2.15247	2.21016e-06	4.08084e-05	UP	no	NO
AT1G78955	-1.16957	0.917415	2.2112e-06	4.08084e-05	DOWN	no	NO
AT5G41520	0.514863	7.78379	2.21926e-06	4.0931e-05	UP	no	NO
AT4G04460	1.10478	2.11221	2.22027e-06	4.0931e-05	UP	no	NO
AT5G59690	0.642605	6.49226	2.24111e-06	4.12926e-05	UP	no	NO
AT1G43590	1.23089	1.55317	2.25425e-06	4.1512e-05	UP	no	NO
AT2G15900	0.573134	5.51418	2.26674e-06	4.17191e-05	UP	no	NO
AT3G05030	-0.592283	5.82171	2.2694e-06	4.17453e-05	DOWN	no	NO
AT1G14310	0.575737	4.16583	2.27768e-06	4.18747e-05	UP	no	NO
AT2G46810	-0.729656	4.85365	2.28859e-06	4.20525e-05	DOWN	no	NO
AT5G16170	1.96477	-0.984197	2.29261e-06	4.21033e-05	UP	no	NO
AT1G16720	-0.52362	8.31551	2.30593e-06	4.23248e-05	DOWN	no	NO
AT5G08680	0.451663	6.90988	2.32394e-06	4.26322e-05	UP	no	NO
AT1G51670	1.45409	0.0704878	2.33162e-06	4.27497e-05	UP	no	NO
AT2G21130	0.943367	2.33074	2.33631e-06	4.28124e-05	UP	no	NO
AT5G22640	0.471436	7.325	2.34141e-06	4.28826e-05	UP	no	NO
AT3G59710	-1.62645	1.74634	2.3472e-06	4.29652e-05	DOWN	no	NO
AT1G26880	0.480577	5.92315	2.35085e-06	4.30087e-05	UP	no	NO
AT1G75330	0.474689	6.35513	2.35546e-06	4.30696e-05	UP	no	NO
AT5G56080	3.46414	-2.90407	2.38088e-06	4.35108e-05	UP	no	NO
AT1G75335	0.989061	1.20595	2.38609e-06	4.35824e-05	UP	no	NO
AT5G14020	1.69905	0.537971	2.39625e-06	4.37442e-05	UP	no	NO
AT3G57150	0.693959	5.13855	2.39945e-06	4.37789e-05	UP	no	NO
AT1G43245	-0.692442	3.21845	2.40952e-06	4.39389e-05	DOWN	no	NO
AT1G66783	-0.728599	4.08452	2.41153e-06	4.39518e-05	DOWN	no	NO
AT5G57640	1.34013	0.606237	2.41553e-06	4.40009e-05	UP	no	NO
AT2G37710	-0.522795	4.91917	2.44488e-06	4.45114e-05	DOWN	no	NO
AT2G37270	0.569237	6.29332	2.46185e-06	4.47961e-05	UP	no	NO
AT1G76960	-1.18871	3.59767	2.46455e-06	4.4821e-05	DOWN	no	NO
AT5G43500	0.519569	4.45258	2.48154e-06	4.51057e-05	UP	no	NO
AT1G14710	0.468705	5.77391	2.48426e-06	4.51307e-05	UP	no	NO
AT1G15380	1.45676	2.7079	2.49142e-06	4.52364e-05	UP	no	NO
AT1G08650	-1.33864	4.70162	2.49357e-06	4.5251e-05	DOWN	no	NO
AT2G03090	-0.898074	3.51198	2.49661e-06	4.52818e-05	DOWN	no	NO
AT5G13830	1.33571	0.426132	2.5003e-06	4.53237e-05	UP	no	NO
AT3G48420	-0.482237	6.83929	2.50161e-06	4.53237e-05	DOWN	no	NO
AT4G02130	0.735558	4.61393	2.51449e-06	4.55326e-05	UP	no	YES	4:944791:G-A;intronic_variant,4:944791:G-A;exonic_variant
AT1G79150	0.773046	3.52221	2.51863e-06	4.5583e-05	UP	no	NO
AT5G16540	-0.445394	5.43835	2.524e-06	4.56558e-05	DOWN	no	NO
AT5G62410	0.705035	4.24913	2.54996e-06	4.61004e-05	UP	no	NO
AT3G17040	-0.436703	7.23287	2.56376e-06	4.63252e-05	DOWN	no	NO
AT1G15100	-0.934502	3.38854	2.57292e-06	4.64658e-05	DOWN	no	NO
AT5G13420	0.567184	5.56728	2.58599e-06	4.66767e-05	UP	no	NO
AT5G26830	0.473937	6.09202	2.60393e-06	4.69649e-05	UP	no	NO
AT3G47990	0.467465	5.32678	2.60474e-06	4.69649e-05	UP	no	NO
AT2G09990	0.502402	5.67899	2.61828e-06	4.71837e-05	UP	no	NO
AT2G22430	-0.645864	7.64998	2.62367e-06	4.72555e-05	DOWN	no	NO
AT1G21250	-1.83231	2.67884	2.64322e-06	4.75822e-05	DOWN	no	NO
AT5G41360	0.536867	4.03273	2.66428e-06	4.79356e-05	UP	no	NO
AT5G23090	-0.609472	3.60819	2.67307e-06	4.80457e-05	DOWN	no	NO
AT4G29950	0.6999	6.55339	2.67325e-06	4.80457e-05	UP	no	NO
AT3G58900	-0.731368	3.65342	2.6771e-06	4.80646e-05	DOWN	no	NO
AT3G58480	3.43196	-2.86977	2.67715e-06	4.80646e-05	UP	no	NO
AT5G25780	0.501034	5.03513	2.67987e-06	4.80656e-05	UP	no	NO
AT1G63750	1.14456	3.41382	2.6812e-06	4.80656e-05	UP	no	NO
AT2G20850	0.496045	4.9538	2.68149e-06	4.80656e-05	UP	no	NO
AT5G57655	0.793844	7.99357	2.68866e-06	4.81685e-05	UP	no	NO
AT1G64220	1.7781	-0.9722	2.69939e-06	4.83254e-05	UP	no	NO
AT5G04600	0.505372	5.54335	2.70029e-06	4.83254e-05	UP	no	NO
AT3G13470	0.460268	6.22459	2.70561e-06	4.83869e-05	UP	no	NO
AT4G33980	2.18873	-1.11123	2.7066e-06	4.83869e-05	UP	no	NO
AT3G23030	0.625651	7.17938	2.71284e-06	4.84728e-05	UP	no	NO
ATCG00190	-0.567154	5.05405	2.71604e-06	4.85042e-05	DOWN	no	NO
AT1G75580	-1.3983	2.73286	2.72797e-06	4.86915e-05	DOWN	no	NO
AT1G17600	-2.16013	-0.516262	2.74142e-06	4.89056e-05	DOWN	no	NO
AT1G05340	0.863266	4.95115	2.74406e-06	4.89267e-05	UP	no	NO
AT4G35310	0.47515	6.13171	2.75367e-06	4.90722e-05	UP	no	NO
AT5G03740	0.449799	5.3171	2.76842e-06	4.93089e-05	UP	no	NO
AT4G11080	0.942127	3.26499	2.7792e-06	4.94748e-05	UP	no	NO
AT4G33250	0.42243	6.52429	2.79423e-06	4.9716e-05	UP	no	NO
AT3G20660	0.679325	3.92657	2.807e-06	4.99168e-05	UP	no	NO
AT4G27280	1.46651	5.33425	2.81124e-06	4.99658e-05	UP	no	NO
AT5G13990	1.80814	0.615965	2.81931e-06	5.0083e-05	UP	no	NO
AT5G61410	-0.468853	9.53928	2.82837e-06	5.02174e-05	DOWN	no	NO
AT4G28530	1.28607	1.33765	2.8441e-06	5.04701e-05	UP	no	YES	4:14094815:T-TG;exonic_variant
AT5G08180	0.568067	4.53173	2.85013e-06	5.05504e-05	UP	no	NO
AT5G23480	1.25521	0.705939	2.86187e-06	5.07319e-05	UP	no	NO
AT5G50900	0.612091	4.45813	2.87254e-06	5.08944e-05	UP	no	NO
AT1G44446	-0.592033	8.60831	2.87814e-06	5.09666e-05	DOWN	no	NO
AT1G16910	3.61516	-1.7184	2.89459e-06	5.1231e-05	UP	no	NO
AT2G42200	-0.926464	3.40476	2.90657e-06	5.1416e-05	DOWN	no	NO
AT3G47540	-0.901926	2.43988	2.92352e-06	5.16865e-05	DOWN	no	NO
AT3G45300	0.758233	7.48048	2.92493e-06	5.16865e-05	UP	no	NO
AT2G31660	0.464364	5.84024	2.93179e-06	5.17807e-05	UP	no	NO
AT5G12050	0.643269	4.81681	2.97359e-06	5.24913e-05	UP	no	NO
AT5G27990	0.52624	4.28625	2.98471e-06	5.26601e-05	UP	no	NO
AT2G14680	0.505357	5.10053	2.99275e-06	5.27742e-05	UP	no	NO
AT2G16005	-3.29902	1.22758	3.00511e-06	5.29645e-05	DOWN	no	NO
AT1G62660	0.84482	6.23461	3.0143e-06	5.30987e-05	UP	no	YES	1:23199783:C-T;exonic_variant
AT1G31173	-1.40352	4.40183	3.03114e-06	5.33582e-05	DOWN	no	NO
AT1G22275	1.09408	1.0027	3.0322e-06	5.33582e-05	UP	no	NO
AT5G43930	0.475512	5.10575	3.0342e-06	5.33654e-05	UP	no	NO
AT5G56500	0.68952	4.65181	3.04719e-06	5.3566e-05	UP	no	NO
AT2G43410	-0.477718	5.3615	3.05443e-06	5.36653e-05	DOWN	no	NO
AT3G17390	0.779621	7.95567	3.05952e-06	5.37266e-05	UP	no	NO
AT3G22320	0.485673	5.79767	3.06314e-06	5.37621e-05	UP	no	NO
AT3G59210	-0.524095	5.06538	3.09255e-06	5.42437e-05	DOWN	no	NO
AT4G25940	0.695959	3.78067	3.09379e-06	5.42437e-05	UP	no	NO
AT1G54170	0.486726	5.28448	3.13033e-06	5.48496e-05	UP	no	NO
AT2G25095	-0.974583	3.54995	3.13161e-06	5.48496e-05	DOWN	no	NO
AT5G17640	0.650516	4.42248	3.15644e-06	5.52558e-05	UP	no	NO
AT1G08630	1.32501	4.20918	3.16545e-06	5.53847e-05	UP	no	NO
AT5G56750	0.477051	5.4534	3.19162e-06	5.58135e-05	UP	no	NO
AT1G29490	2.36229	-0.66918	3.19847e-06	5.59043e-05	UP	no	NO
AT2G42270	-0.59358	5.19703	3.20053e-06	5.59113e-05	DOWN	no	NO
AT3G15090	-0.541332	3.97418	3.20351e-06	5.59344e-05	DOWN	no	NO
AT1G06900	0.481806	5.809	3.20874e-06	5.59967e-05	UP	no	NO
AT5G26622	-0.496772	4.75461	3.22032e-06	5.6154e-05	DOWN	no	NO
AT1G09700	0.631829	3.43012	3.22109e-06	5.6154e-05	UP	no	NO
AT1G01970	-0.534935	4.72578	3.22477e-06	5.6189e-05	DOWN	no	NO
AT2G28600	0.546823	3.96603	3.24106e-06	5.64437e-05	UP	no	NO
AT1G76180	0.636129	9.36612	3.25725e-06	5.66964e-05	UP	no	NO
AT4G10250	3.5317	-0.957021	3.26862e-06	5.68622e-05	UP	no	NO
AT5G53620	0.447433	5.66891	3.27016e-06	5.68622e-05	UP	no	NO
AT5G49900	0.901877	2.97928	3.27482e-06	5.6914e-05	UP	no	NO
AT5G03300	0.491085	6.031	3.27916e-06	5.696e-05	UP	no	NO
AT3G23090	0.991883	3.12341	3.28299e-06	5.69971e-05	UP	no	NO
AT5G57590	0.615319	4.04061	3.31135e-06	5.74598e-05	UP	no	NO
AT3G22230	0.515433	6.74102	3.33537e-06	5.78468e-05	UP	no	NO
AT3G56020	0.51091	5.31877	3.3413e-06	5.79198e-05	UP	no	NO
AT5G20790	-3.76237	3.34004	3.36899e-06	5.83698e-05	DOWN	no	NO
AT3G48930	0.521278	7.07021	3.37804e-06	5.84966e-05	UP	no	NO
AT3G62860	0.761421	4.45844	3.38389e-06	5.85677e-05	UP	no	NO
AT5G58380	-0.534364	4.45488	3.39368e-06	5.86919e-05	DOWN	no	NO
AT1G68570	-0.762947	5.4634	3.39455e-06	5.86919e-05	DOWN	no	NO
AT1G04660	3.24213	-2.3404	3.4118e-06	5.89599e-05	UP	no	NO
AT4G25835	0.772391	4.01576	3.41596e-06	5.90012e-05	UP	no	NO
AT4G35250	-0.519935	7.4551	3.41769e-06	5.90012e-05	DOWN	no	NO
AT2G45790	0.465964	5.64467	3.42328e-06	5.9039e-05	UP	no	NO
AT2G29420	-0.843479	4.17979	3.42339e-06	5.9039e-05	DOWN	no	NO
AT5G08430	-0.463911	5.04958	3.42559e-06	5.90468e-05	DOWN	no	NO
AT1G14330	0.724861	3.91257	3.43427e-06	5.91661e-05	UP	no	NO
AT5G20290	0.474084	8.75869	3.4372e-06	5.91863e-05	UP	no	NO
AT5G17450	-1.12082	2.36586	3.43965e-06	5.91982e-05	DOWN	no	NO
AT2G40200	-1.55433	-0.0824458	3.44982e-06	5.93429e-05	DOWN	no	NO
AT5G46500	-1.74683	0.455982	3.47095e-06	5.96758e-05	DOWN	no	NO
AT1G22270	0.567656	3.82616	3.48403e-06	5.98702e-05	UP	no	NO
AT3G20810	1.4439	2.56461	3.49577e-06	6.00414e-05	UP	no	NO
AT5G12030	2.43119	1.31252	3.52746e-06	6.05546e-05	UP	no	NO
AT1G67840	-0.493173	6.25571	3.54042e-06	6.07463e-05	DOWN	no	NO
AT5G16690	1.0964	1.9641	3.54244e-06	6.07499e-05	UP	no	NO
AT5G61740	1.41881	-0.259594	3.5485e-06	6.08229e-05	UP	no	NO
AT3G20270	-0.530029	4.39646	3.55403e-06	6.08867e-05	DOWN	no	NO
AT3G25240	-5.25192	0.727097	3.59812e-06	6.16107e-05	DOWN	no	NO
AT1G63940	0.475486	6.05298	3.6155e-06	6.18537e-05	UP	no	NO
AT5G41830	3.7807	-2.50875	3.61598e-06	6.18537e-05	UP	no	YES	5:16746802:TTA-T;intronic_variant
AT2G40650	0.503848	4.7554	3.64733e-06	6.23583e-05	UP	yes	NO
AT1G20910	0.519243	4.11109	3.69486e-06	6.31377e-05	UP	no	NO
AT4G21710	0.452278	6.48253	3.69667e-06	6.31377e-05	UP	no	NO
AT5G40890	0.427053	8.32378	3.70889e-06	6.33144e-05	UP	no	NO
AT5G40730	1.08684	3.7324	3.74353e-06	6.38734e-05	UP	no	NO
AT1G78940	-1.25764	0.667686	3.76079e-06	6.41194e-05	DOWN	no	NO
AT4G08555	-3.29483	0.766143	3.76177e-06	6.41194e-05	DOWN	no	NO
AT1G23110	-4.62052	1.89832	3.78117e-06	6.44176e-05	DOWN	no	NO
AT2G40340	2.30127	-1.03821	3.80958e-06	6.48688e-05	UP	no	NO
AT3G23210	-0.787592	3.2385	3.84924e-06	6.55111e-05	DOWN	no	NO
AT2G46192	-1.26632	1.02292	3.89103e-06	6.61888e-05	DOWN	no	NO
AT4G24260	2.45164	-1.57028	3.90869e-06	6.64556e-05	UP	no	NO
AT3G08590	0.487723	7.01337	3.91357e-06	6.65051e-05	UP	no	NO
AT3G54650	0.618324	5.0859	3.95497e-06	6.71746e-05	UP	no	NO
AT5G46730	0.77388	4.18614	3.98661e-06	6.76778e-05	UP	no	NO
AT4G26110	0.56132	6.65532	4.00482e-06	6.79528e-05	UP	no	NO
AT1G18290	1.59925	-0.121017	4.03371e-06	6.84086e-05	UP	no	NO
AT3G28920	-0.512956	4.65038	4.04259e-06	6.85246e-05	DOWN	no	NO
AT4G28510	0.600479	4.50946	4.04628e-06	6.85528e-05	UP	no	NO
AT2G29540	0.834398	2.05667	4.07341e-06	6.89776e-05	UP	no	NO
AT1G67060	0.502016	4.17269	4.08112e-06	6.90735e-05	UP	no	NO
AT4G02450	0.459157	6.80583	4.09791e-06	6.93142e-05	UP	no	NO
AT3G13040	-0.447293	7.13938	4.09946e-06	6.93142e-05	DOWN	no	NO
AT5G22250	1.17033	1.87018	4.12212e-06	6.96623e-05	UP	no	NO
AT1G54490	0.437729	6.09949	4.12612e-06	6.9695e-05	UP	no	NO
AT3G17611	-0.841997	2.62739	4.1299e-06	6.97238e-05	DOWN	no	NO
AT5G06790	-1.46196	2.03345	4.13221e-06	6.97279e-05	DOWN	no	NO
AT5G11070	0.700001	4.37617	4.14515e-06	6.99052e-05	UP	no	NO
AT4G11050	2.79977	-0.819131	4.14686e-06	6.99052e-05	UP	no	NO
AT1G61570	0.668883	3.51153	4.17525e-06	7.03485e-05	UP	no	NO
[truncated: 5,509 more rows]

## Sheet: cwc16a-2
Gene ID	logFC	logCPM	PValue	FDR	Direction of change	In Koncz list?	has SNP/indels?	SNPs/indels
AT1G24825	-3.86467	6.60612	5.54827e-189	1.86871e-184	DOWN	no	NO
AT1G25175	1.94138	7.96333	5.5649e-62	9.37157e-58	UP	no	NO
AT3G45970	3.02397	3.68145	4.01382e-44	4.50631e-40	UP	no	NO
AT3G07300	1.41806	5.56565	1.24283e-42	1.0465e-38	UP	no	NO
AT5G57560	3.27741	8.27495	4.7072e-39	3.17087e-35	UP	no	NO
AT3G47630	1.36621	4.46118	1.6449e-38	9.23365e-35	UP	no	NO
AT2G41100	2.83646	6.39848	5.91767e-33	2.84733e-29	UP	no	NO
AT3G14075	1.15346	4.97881	8.74123e-33	3.68017e-29	UP	no	NO
AT5G45710	1.3313	4.89621	1.57615e-32	5.89849e-29	UP	no	NO
AT2G27830	1.31869	6.86583	3.5514e-32	1.19615e-28	UP	no	NO
AT3G05380	1.24688	5.60556	4.51212e-32	1.38157e-28	UP	no	NO
AT1G49730	1.17435	5.83725	1.50737e-31	4.23082e-28	UP	no	NO
AT2G20815	1.54087	4.04614	1.80853e-30	4.68563e-27	UP	no	NO
AT1G29800	-1.57035	3.84523	6.67143e-30	1.605e-26	DOWN	no	YES	1:10433339:G-A;exonic_variant
AT4G37260	2.11986	5.92708	2.01116e-28	4.29734e-25	UP	no	NO
AT1G35140	3.06918	4.8001	2.04143e-28	4.29734e-25	UP	no	NO
AT3G43850	2.20604	3.17444	9.77654e-28	1.93696e-24	UP	no	NO
AT3G54500	-1.10229	8.42956	1.16342e-26	2.17696e-23	DOWN	no	NO
AT4G21880	1.86829	3.36543	7.44208e-26	1.31925e-22	UP	no	NO
AT1G27921	-2.65683	1.90487	3.16451e-25	5.32919e-22	DOWN	no	NO
AT2G47410	1.02129	6.59564	4.02362e-25	6.45331e-22	UP	no	NO
AT4G17460	1.59259	5.53126	8.28051e-25	1.26771e-21	UP	no	NO
AT1G76590	1.53959	4.35775	3.97448e-24	5.8202e-21	UP	no	NO
AT5G61590	1.5707	6.42838	1.2242e-23	1.71801e-20	UP	no	NO
AT4G37800	-1.11529	7.22661	1.42369e-23	1.91806e-20	DOWN	no	NO
AT4G32480	1.28659	6.39643	1.01643e-22	1.3167e-19	UP	no	NO
AT5G08150	2.47639	1.73143	1.51631e-22	1.89152e-19	UP	no	NO
AT2G41640	1.05826	5.32287	3.17798e-22	3.82276e-19	UP	no	NO
AT2G39870	1.22583	5.32364	3.72488e-22	4.32612e-19	UP	no	NO
AT1G25400	2.68476	2.83007	6.29515e-22	7.06757e-19	UP	no	NO
AT1G13530	2.63595	1.59324	9.42607e-22	1.02413e-18	UP	no	NO
AT3G09450	-3.12216	2.45567	1.11685e-21	1.17552e-18	DOWN	no	NO
AT5G57160	0.991753	4.94689	1.31568e-21	1.34283e-18	UP	no	NO
AT2G38790	1.29149	4.32961	2.65097e-21	2.6261e-18	UP	no	NO
AT3G48360	2.59864	8.12629	3.22178e-21	3.09766e-18	UP	no	NO
AT4G20060	1.16119	4.2597	3.31094e-21	3.09766e-18	UP	no	NO
AT1G73500	1.44059	4.88233	3.66592e-21	3.33708e-18	UP	no	NO
AT4G36850	1.40223	8.51962	4.32197e-21	3.83075e-18	UP	no	YES	4:17354711:GA-G;intronic_variant,4:17353918:GA-G;splice_acceptor_region_variant
AT3G44990	-1.24938	6.65429	8.21407e-21	7.0938e-18	DOWN	no	NO
AT5G10140	2.97184	2.68459	9.04933e-21	7.61976e-18	UP	no	NO
AT4G28703	1.8334	2.81475	1.03406e-20	8.49465e-18	UP	no	NO
AT2G36070	0.962617	5.16145	3.14256e-20	2.52011e-17	UP	no	NO
AT4G28040	1.17367	7.00689	3.88641e-20	3.04414e-17	UP	no	NO
AT5G01820	-1.17986	5.99455	6.94894e-20	5.31925e-17	DOWN	no	NO
AT1G22190	1.0395	5.96143	1.12803e-19	8.44294e-17	UP	no	NO
AT5G47900	1.06491	4.91109	1.97446e-19	1.44569e-16	UP	no	NO
AT3G02860	0.942088	5.26742	2.04551e-19	1.46585e-16	UP	yes	YES	3:625208:T-TC;exonic_variant
AT3G57660	0.957728	4.91694	5.03682e-19	3.53427e-16	UP	no	NO
AT2G33830	1.50999	8.07022	6.48336e-19	4.45645e-16	UP	no	NO
AT1G65950	0.943078	4.85278	1.25929e-18	8.48283e-16	UP	no	NO
AT3G02300	-0.9655	5.73495	1.35821e-18	8.96978e-16	DOWN	no	NO
AT4G08950	2.59556	7.62484	1.57643e-18	1.02107e-15	UP	no	NO
AT3G43210	1.21513	4.25691	1.83701e-18	1.1674e-15	UP	no	NO
AT5G06120	0.834734	6.06256	2.05836e-18	1.28385e-15	UP	no	YES	5:1848991:T-C;exonic_variant,5:1848991:T-C;protein_coding;sense;TTG>CTG;L>L
AT1G69890	1.95952	4.12764	3.30095e-18	2.02144e-15	UP	no	YES	1:26324474:C-T;protein_coding;sense;AAG>AAA;K>K
AT3G27000	1.09721	3.83805	4.23351e-18	2.54623e-15	UP	no	NO
AT5G59960	0.891347	6.93223	4.69438e-18	2.77389e-15	UP	no	NO
AT2G01690	0.794949	6.4146	6.18231e-18	3.56571e-15	UP	no	NO
AT1G04240	1.22504	5.34408	6.24615e-18	3.56571e-15	UP	no	NO
AT1G02660	2.05622	5.3223	7.40424e-18	4.15637e-15	UP	no	NO
AT3G10020	0.803817	7.85703	1.40506e-17	7.75798e-15	UP	no	NO
AT1G55750	0.867366	4.84152	1.53215e-17	8.32326e-15	UP	no	NO
AT5G38420	-0.924324	10.8821	2.0507e-17	1.09634e-14	DOWN	no	NO
AT1G21910	2.13877	5.01779	2.50909e-17	1.31946e-14	UP	no	NO
AT3G17700	0.953078	4.37739	2.55131e-17	1.31946e-14	UP	no	NO
AT5G50780	0.911267	4.84515	2.58556e-17	1.31946e-14	UP	no	NO
AT4G16680	-1.53092	3.55707	2.68712e-17	1.35082e-14	DOWN	no	YES	4:9390455:C-CCTTCTTAGGCATCTTCACACCATCATTCAACATAATCTCGTCTTTGA;exonic_variant&protein_coding,4:9390455:C-CCTTCTTAGGCATCTTCACACCATCATTCAACATAATCTCGTCTTTGA;exonic_variant&splice_donor_region_variant&protein_coding
AT3G03300	1.05326	5.86304	4.53485e-17	2.24615e-14	UP	no	NO
AT1G72416	2.87637	3.4565	5.70566e-17	2.78511e-14	UP	no	NO
AT5G51550	1.36363	5.19092	1.02698e-16	4.94139e-14	UP	no	NO
AT3G57520	1.19593	7.29608	1.34688e-16	6.38931e-14	UP	no	NO
AT1G77890	1.04831	4.06049	1.88262e-16	8.80675e-14	UP	no	NO
AT5G17250	1.01829	4.10618	1.9138e-16	8.82996e-14	UP	no	NO
AT3G47420	-1.45159	6.19775	2.05913e-16	9.37209e-14	DOWN	no	NO
AT2G41410	0.952123	6.69914	2.54849e-16	1.14447e-13	UP	no	NO
AT4G25990	1.41152	2.93862	3.2314e-16	1.43206e-13	UP	no	NO
AT5G45340	2.38313	2.28309	3.31175e-16	1.43782e-13	UP	no	NO
AT1G25550	1.0395	7.22237	3.32977e-16	1.43782e-13	UP	no	NO
AT4G25580	3.59002	5.01042	4.03405e-16	1.71988e-13	UP	no	NO
AT5G01770	0.879435	4.58914	4.42024e-16	1.86098e-13	UP	no	NO
AT5G67240	0.857807	5.30934	5.84065e-16	2.42863e-13	UP	no	NO
AT5G25240	2.14939	3.38301	6.33833e-16	2.60343e-13	UP	no	NO
AT3G05200	0.967026	5.03556	6.95446e-16	2.82208e-13	UP	no	NO
AT1G29940	0.957177	5.0125	1.02175e-15	4.09686e-13	UP	no	NO
AT5G53010	0.842962	4.73742	1.11787e-15	4.42952e-13	UP	no	NO
AT2G17230	2.75867	5.68339	1.27707e-15	5.00149e-13	UP	no	NO
AT4G10250	5.31937	-0.957021	1.88256e-15	7.28809e-13	UP	no	NO
AT4G35270	-0.936404	4.41939	2.37319e-15	9.08312e-13	DOWN	no	NO
AT1G06360	0.99433	5.47086	2.43825e-15	9.22727e-13	UP	no	NO
AT3G57530	0.890301	5.97201	2.88497e-15	1.07965e-12	UP	no	NO
AT5G63160	1.91632	7.28042	3.21046e-15	1.18826e-12	UP	no	NO
AT1G30720	2.05042	1.57542	3.73041e-15	1.3657e-12	UP	no	NO
AT2G19650	-1.84794	2.8982	4.04964e-15	1.46662e-12	DOWN	no	NO
AT4G27820	0.927654	6.21878	4.26203e-15	1.52712e-12	UP	no	YES	4:13858376:G-A;intronic_variant
AT4G24230	1.48212	6.74482	4.52434e-15	1.60405e-12	UP	no	NO
AT1G30590	-0.816522	5.64524	5.10999e-15	1.79281e-12	DOWN	no	YES	1:10839469:G-A;protein_coding;missense;GCT>GTT;A>V
AT2G25200	1.38362	5.00652	5.20305e-15	1.79918e-12	UP	no	NO
AT1G12930	0.787065	5.25153	5.23498e-15	1.79918e-12	UP	no	NO
AT4G32800	2.52348	1.14594	7.11581e-15	2.42089e-12	UP	no	NO
AT4G19170	-0.917755	8.36043	7.18977e-15	2.42159e-12	DOWN	no	NO
AT3G48390	1.53083	3.6404	7.73621e-15	2.57983e-12	UP	no	NO
AT5G12020	4.7576	0.460405	7.87385e-15	2.59999e-12	UP	no	NO
AT1G52100	-0.842294	5.61762	7.99621e-15	2.61476e-12	DOWN	no	YES	1:19383685:A-AC;splice_donor_variant,1:19383685:A-AC;exonic_variant&protein_coding
AT4G12020	0.915615	5.74491	8.28541e-15	2.68328e-12	UP	no	NO
AT1G32920	1.66317	5.22096	8.40379e-15	2.6957e-12	UP	no	NO
AT1G29030	0.973903	3.85855	1.08189e-14	3.43766e-12	UP	no	NO
AT1G64440	0.848524	4.79739	1.17527e-14	3.69945e-12	UP	no	NO
AT3G53800	0.960207	6.0382	1.41174e-14	4.40268e-12	UP	no	NO
AT2G38470	1.6678	5.82286	1.43982e-14	4.44904e-12	UP	no	NO
AT5G03555	-1.00853	5.27229	1.54339e-14	4.72571e-12	DOWN	no	NO
AT4G33467	3.07271	3.04643	1.6275e-14	4.93837e-12	UP	no	NO
AT4G23870	1.70717	5.73833	1.66175e-14	4.99728e-12	UP	no	NO
AT2G31902	-2.47054	0.952223	1.90887e-14	5.68963e-12	DOWN	no	NO
AT3G62550	0.81299	8.21477	1.99978e-14	5.90831e-12	UP	no	NO
AT3G56400	1.57344	4.37047	2.74072e-14	8.02697e-12	UP	no	NO
AT5G67480	1.70179	5.70909	3.26966e-14	9.49358e-12	UP	no	NO
AT2G46600	1.53331	5.66587	3.67482e-14	1.05124e-11	UP	no	NO
AT2G15090	0.960865	6.7889	3.68298e-14	1.05124e-11	UP	no	NO
AT5G61440	1.48285	2.79776	3.85428e-14	1.09089e-11	UP	no	NO
AT5G13950	0.723272	6.78195	3.97676e-14	1.11618e-11	UP	no	NO
AT4G02330	1.89892	3.07064	4.52985e-14	1.26091e-11	UP	no	NO
AT5G56100	1.22503	5.09392	6.18089e-14	1.70638e-11	UP	no	NO
AT3G47500	-1.11572	6.19887	7.0419e-14	1.92828e-11	DOWN	no	NO
AT1G25560	0.956279	7.47758	7.18711e-14	1.95217e-11	UP	no	NO
AT1G66160	1.80151	2.75294	7.45104e-14	2.00767e-11	UP	no	NO
AT4G19160	0.974938	8.41312	8.05236e-14	2.15247e-11	UP	no	NO
AT3G55980	2.08419	5.7935	8.24476e-14	2.18655e-11	UP	no	NO
AT1G77210	1.17724	5.10872	8.89616e-14	2.34087e-11	UP	no	NO
AT3G52340	0.79291	7.78398	9.23207e-14	2.41043e-11	UP	no	NO
AT1G08890	1.0027	5.19885	1.00696e-13	2.60888e-11	UP	no	NO
AT2G44130	1.02813	6.16369	1.02272e-13	2.62949e-11	UP	no	NO
AT3G59350	1.25014	4.55467	1.06481e-13	2.71696e-11	UP	no	NO
AT3G21750	-0.829732	4.61271	1.08577e-13	2.74961e-11	DOWN	no	NO
AT1G27770	1.07866	5.38877	1.24918e-13	3.123e-11	UP	no	NO
AT2G03640	0.756283	6.22943	1.25176e-13	3.123e-11	UP	no	NO
AT5G44680	1.02736	6.51938	1.29163e-13	3.19877e-11	UP	no	NO
AT1G19650	0.823589	5.82668	1.53623e-13	3.77677e-11	UP	no	YES	1:6799746:C-CT;exonic_variant
AT3G10720	0.908987	6.53955	1.65446e-13	4.03796e-11	UP	no	NO
AT3G59080	1.88431	3.49944	1.85721e-13	4.50018e-11	UP	no	NO
AT2G20570	-1.04817	6.67483	1.90995e-13	4.59251e-11	DOWN	no	NO
AT4G15800	0.922244	4.69771	1.92258e-13	4.59251e-11	UP	no	YES	4:8985692:TG-T;exonic_variant,4:8985631:AT-A;exonic_variant,4:8985599:TTG-T;exonic_variant,4:8985758:TG-T;exonic_variant,4:8985638:CG-C;exonic_variant,4:8985806:GT-G;exonic_variant,4:8985723:AT-A;exonic_variant
AT4G17490	2.66724	2.90353	2.3534e-13	5.53758e-11	UP	no	NO
AT1G03580	1.53713	2.61066	2.37495e-13	5.53758e-11	UP	no	NO
AT3G10985	1.08582	6.23791	2.38297e-13	5.53758e-11	UP	no	NO
AT5G06320	1.09938	5.24132	2.38398e-13	5.53758e-11	UP	no	NO
AT1G27360	1.0297	4.09434	2.59423e-13	5.97349e-11	UP	no	NO
AT3G26932	-0.817376	4.64728	2.60712e-13	5.97349e-11	DOWN	no	NO
AT1G01620	0.666053	8.954	2.6469e-13	6.02367e-11	UP	no	NO
AT2G42870	1.39251	4.89226	3.03826e-13	6.86788e-11	UP	no	NO
AT5G07380	1.35757	2.39098	3.09848e-13	6.95732e-11	UP	no	NO
AT3G54810	1.7368	5.94315	3.47414e-13	7.74917e-11	UP	no	NO
AT5G61600	2.44806	4.22746	4.49464e-13	9.95947e-11	UP	no	NO
AT3G25840	-0.758671	6.08487	4.8779e-13	1.07381e-10	DOWN	yes	NO
AT1G73430	0.682856	5.81618	4.94888e-13	1.08236e-10	UP	no	YES	1:27609704:C-T;protein_coding;missense;CCT>CTT;P>L,1:27609704:C-T;intronic_variant
AT2G31560	-0.913444	5.1064	5.75271e-13	1.25005e-10	DOWN	no	NO
AT1G04000	-1.06004	3.1653	5.85912e-13	1.26501e-10	DOWN	no	NO
AT1G74310	1.764	4.0842	9.17786e-13	1.96891e-10	UP	no	NO
AT4G37220	1.70781	2.75674	9.37918e-13	1.99937e-10	UP	no	NO
AT4G12720	0.953422	4.971	1.00984e-12	2.13916e-10	UP	no	NO
AT3G01800	1.25347	2.91728	1.0643e-12	2.24042e-10	UP	no	NO
AT3G04140	-1.17852	3.92626	1.0716e-12	2.24178e-10	DOWN	no	NO
AT5G19190	1.30759	7.71256	1.11279e-12	2.31357e-10	UP	no	NO
AT1G72150	0.759712	9.34143	1.14483e-12	2.36558e-10	UP	no	NO
AT2G40700	0.860832	4.03586	1.26596e-12	2.59993e-10	UP	no	NO
AT5G54470	-1.82099	2.32682	1.32496e-12	2.7046e-10	DOWN	no	NO
AT1G03870	1.79206	5.73966	1.37518e-12	2.7902e-10	UP	no	NO
AT5G12030	3.82873	1.31252	1.39355e-12	2.81054e-10	UP	no	NO
AT3G49790	1.15488	6.30125	1.44357e-12	2.8941e-10	UP	no	NO
AT2G20670	1.24893	8.99804	1.62037e-12	3.22933e-10	UP	no	NO
AT1G50040	3.43309	2.28057	1.91102e-12	3.76474e-10	UP	no	NO
AT3G26290	-0.873664	6.83308	1.91138e-12	3.76474e-10	DOWN	no	NO
AT4G26288	1.59569	4.20031	1.95277e-12	3.82392e-10	UP	no	NO
AT1G62030	-0.998827	3.66272	1.99375e-12	3.88158e-10	DOWN	no	NO
AT4G13840	-0.786376	5.76112	2.68871e-12	5.20452e-10	DOWN	no	NO
AT4G02560	0.661055	5.49649	2.79686e-12	5.36599e-10	UP	no	NO
AT4G27280	2.2359	5.33425	2.80908e-12	5.36599e-10	UP	no	NO
AT4G26850	-0.958938	8.49009	2.83255e-12	5.36599e-10	DOWN	no	NO
AT2G30930	1.14858	5.26426	2.83586e-12	5.36599e-10	UP	no	NO
AT1G69840	0.932866	5.20194	2.85594e-12	5.3738e-10	UP	no	NO
AT4G37240	1.78325	1.43911	3.081e-12	5.76506e-10	UP	no	NO
AT5G16370	0.956169	7.00908	3.25991e-12	6.06614e-10	UP	no	NO
AT2G23810	1.15403	6.43158	3.46319e-12	6.40899e-10	UP	no	NO
AT3G07530	1.03187	3.06121	3.99328e-12	7.3496e-10	UP	no	NO
AT1G27100	0.755184	6.33295	4.08341e-12	7.47464e-10	UP	no	NO
AT1G32170	0.993475	3.73194	4.15822e-12	7.57044e-10	UP	no	NO
AT3G11964	0.74679	5.39464	4.3128e-12	7.80964e-10	UP	no	NO
AT5G11070	1.05171	4.37617	4.79478e-12	8.63598e-10	UP	no	NO
AT4G08035	-0.834547	4.50553	4.93601e-12	8.84307e-10	DOWN	no	NO
AT1G25440	-0.758463	7.3783	5.09499e-12	9.07169e-10	DOWN	no	NO
AT1G28090	0.714687	4.74848	5.11749e-12	9.07169e-10	UP	no	NO
AT3G60530	0.892568	7.30162	6.44225e-12	1.13603e-09	UP	no	NO
AT5G65660	0.855628	6.00604	6.65013e-12	1.16237e-09	UP	no	NO
AT3G19840	0.700842	4.67414	6.66066e-12	1.16237e-09	UP	yes	NO
AT4G30440	0.841882	6.78712	6.96152e-12	1.20861e-09	UP	no	NO
AT4G24240	0.858163	4.33348	8.34958e-12	1.44217e-09	UP	no	NO
AT3G15450	1.47908	9.68778	8.72478e-12	1.49928e-09	UP	no	NO
AT1G09300	0.93724	3.49118	9.21622e-12	1.57569e-09	UP	no	YES	1:3008063:A-AG;exonic_variant&protein_coding,1:3008063:A-AG;exonic_variant
AT4G36730	0.670979	6.77622	1.01873e-11	1.73293e-09	UP	no	NO
AT3G08020	0.673797	5.5222	1.111e-11	1.88037e-09	UP	no	NO
AT5G01810	0.944733	5.5226	1.30899e-11	2.2044e-09	UP	no	NO
AT3G56990	0.880445	4.10958	1.37008e-11	2.2958e-09	UP	no	NO
AT5G37770	1.32505	5.03966	1.37733e-11	2.29653e-09	UP	no	NO
AT3G49940	0.7294	5.72639	1.42075e-11	2.35725e-09	UP	no	NO
AT5G44020	1.03064	8.04977	1.52792e-11	2.52264e-09	UP	no	NO
AT3G50060	2.13268	4.37454	1.5905e-11	2.61316e-09	UP	no	NO
AT3G33528	-2.06287	-0.0231424	1.61516e-11	2.6286e-09	DOWN	no	NO
AT1G22490	1.64946	1.35973	1.61551e-11	2.6286e-09	UP	no	NO
AT3G53460	0.818094	8.5582	1.63348e-11	2.64506e-09	UP	no	NO
AT1G06590	0.826148	3.9263	1.68829e-11	2.72072e-09	UP	no	NO
AT4G34920	-0.666931	6.07836	1.75245e-11	2.81069e-09	DOWN	no	NO
AT3G55130	-1.03857	4.97007	1.91417e-11	3.04559e-09	DOWN	no	NO
AT3G62950	2.32352	3.83447	1.917e-11	3.04559e-09	UP	no	NO
AT5G54380	1.49475	5.95451	2.02956e-11	3.20927e-09	UP	no	NO
AT2G30070	0.714474	5.21242	2.04303e-11	3.21548e-09	UP	no	NO
AT1G15290	0.693356	8.19728	2.17091e-11	3.39298e-09	UP	no	NO
AT4G24840	0.650527	5.40269	2.17595e-11	3.39298e-09	UP	no	NO
AT1G03410	-0.907269	4.03558	2.40139e-11	3.72725e-09	DOWN	no	NO
AT3G55840	1.68823	1.39821	2.47422e-11	3.82267e-09	UP	no	NO
AT5G55620	-0.849626	5.33616	2.715e-11	4.17552e-09	DOWN	no	NO
AT3G62720	1.56427	4.91402	3.01717e-11	4.61915e-09	UP	no	NO
AT3G21890	-2.50329	1.55018	3.09968e-11	4.724e-09	DOWN	no	NO
AT3G57930	0.921633	4.5029	3.19975e-11	4.85455e-09	UP	no	NO
AT4G31800	1.77799	3.40293	3.23784e-11	4.8903e-09	UP	no	NO
AT1G75020	0.92488	3.75452	3.26792e-11	4.91369e-09	UP	no	YES	1:28171797:C-T;intronic_variant,1:28171797:C-T;protein_coding;sense;CTG>TTG;L>L
AT2G26780	0.651039	6.06871	3.60063e-11	5.38482e-09	UP	no	NO
AT4G39070	2.48448	0.443723	3.61322e-11	5.38482e-09	UP	no	NO
AT1G64900	-0.843877	5.94513	3.6484e-11	5.41329e-09	DOWN	no	NO
AT3G15310	-1.99469	1.03321	3.66913e-11	5.42018e-09	DOWN	no	NO
AT3G06530	0.82411	4.87542	4.16095e-11	6.11986e-09	UP	no	NO
AT3G15500	1.65081	4.379	4.474e-11	6.55168e-09	UP	no	NO
AT3G62420	0.865757	5.89021	4.52072e-11	6.59145e-09	UP	no	NO
AT5G42050	0.746702	7.34051	4.74159e-11	6.88368e-09	UP	no	NO
AT5G07300	0.621176	6.01013	4.83771e-11	6.99309e-09	UP	no	NO
AT4G02170	3.1836	-0.443301	5.16635e-11	7.43624e-09	UP	no	NO
AT1G67970	1.37424	2.56413	5.28835e-11	7.57944e-09	UP	no	NO
AT5G45750	0.955366	4.59695	5.61773e-11	8.01741e-09	UP	no	NO
AT2G33990	0.805281	4.46106	6.01411e-11	8.54689e-09	UP	no	NO
AT5G25150	0.669609	5.1024	6.08566e-11	8.61222e-09	UP	no	NO
AT2G03760	0.922403	4.58711	6.57845e-11	9.27066e-09	UP	no	NO
AT4G30280	1.84564	4.42326	6.99008e-11	9.80971e-09	UP	no	YES	4:14827204:G-T;exonic_variant
AT1G48635	0.670844	5.04088	8.02671e-11	1.12177e-08	UP	no	NO
AT1G56300	1.0535	4.51669	8.70858e-11	1.21204e-08	UP	no	NO
AT1G12750	0.818951	4.67189	9.02679e-11	1.24603e-08	UP	no	NO
AT2G47440	1.54571	6.27571	9.02682e-11	1.24603e-08	UP	no	YES	2:19470361:C-T;exonic_variant,2:19470361:C-T;protein_coding;sense;TGC>TGT;C>C
AT3G55110	-1.19549	2.99842	9.2731e-11	1.27481e-08	DOWN	no	NO
AT5G66210	0.854616	4.92283	9.31442e-11	1.27528e-08	UP	no	NO
AT2G33050	-1.24955	2.77592	9.48473e-11	1.29307e-08	DOWN	no	YES	2:14023427:C-T;protein_coding;missense;CTC>TTC;L>F
AT3G10420	-0.771995	6.94031	9.52113e-11	1.29307e-08	DOWN	no	NO
AT2G25740	0.739888	4.60828	9.85904e-11	1.33358e-08	UP	no	NO
AT2G15020	-2.4488	5.50243	1.03218e-10	1.39059e-08	DOWN	no	NO
AT2G47310	0.901807	3.46115	1.0954e-10	1.46989e-08	UP	no	NO
AT3G29370	1.33697	3.56996	1.18314e-10	1.58133e-08	UP	no	NO
AT5G49190	1.40254	1.79741	1.20362e-10	1.60233e-08	UP	no	NO
AT3G45210	-1.12998	4.05249	1.26145e-10	1.67271e-08	DOWN	no	NO
AT2G31230	-1.71399	2.25566	1.29108e-10	1.70529e-08	DOWN	no	NO
AT2G25850	-0.74872	4.81577	1.38132e-10	1.81576e-08	DOWN	no	NO
AT1G49470	-1.1366	3.77513	1.3855e-10	1.81576e-08	DOWN	no	NO
AT1G80440	0.982464	8.33908	1.41112e-10	1.84217e-08	UP	no	NO
AT3G15180	0.766764	4.68104	1.57185e-10	2.04408e-08	UP	no	NO
AT2G18860	0.838315	4.31537	1.79183e-10	2.32117e-08	UP	no	NO
AT3G04490	0.602628	5.65249	1.80281e-10	2.32646e-08	UP	no	NO
AT4G08040	3.06128	-0.167697	1.91244e-10	2.45851e-08	UP	no	NO
AT3G55430	0.776386	6.06146	1.93783e-10	2.48168e-08	UP	no	YES	3:20551358:C-CA;intronic_variant
AT5G59540	-0.674552	6.85714	2.08523e-10	2.66033e-08	DOWN	no	NO
AT2G39630	0.621468	5.28159	2.14541e-10	2.72677e-08	UP	no	NO
AT1G66725	-1.5634	1.74882	2.31274e-10	2.9284e-08	DOWN	no	NO
AT2G02950	0.74826	5.02312	2.3279e-10	2.93656e-08	UP	no	NO
AT1G72430	1.51403	5.50836	2.35246e-10	2.95647e-08	UP	no	NO
AT2G28120	1.50633	4.67832	2.48863e-10	3.11597e-08	UP	no	NO
AT5G15948	-1.34402	5.75566	2.50371e-10	3.12324e-08	DOWN	no	NO
AT3G45730	0.810213	4.58504	2.56582e-10	3.1889e-08	UP	no	NO
AT2G01980	0.657793	4.87586	2.57955e-10	3.19419e-08	UP	no	NO
AT4G24700	-1.37941	2.8728	2.59932e-10	3.20687e-08	DOWN	no	NO
AT2G34600	3.6359	3.16578	2.64414e-10	3.25027e-08	UP	no	NO
AT1G03610	0.92375	6.54623	2.84531e-10	3.48484e-08	UP	no	NO
AT4G35740	0.77219	4.01811	2.90748e-10	3.54807e-08	UP	no	NO
AT5G20230	2.12156	4.09669	2.93965e-10	3.57438e-08	UP	no	NO
AT5G45630	3.35903	1.01213	3.11436e-10	3.77319e-08	UP	no	NO
AT3G15630	1.17298	4.63135	3.19814e-10	3.86081e-08	UP	no	NO
AT3G08960	0.602089	5.44591	3.25393e-10	3.91413e-08	UP	no	NO
AT3G28200	0.896117	5.98921	3.69961e-10	4.4344e-08	UP	no	NO
AT3G07470	1.0594	5.68253	3.72981e-10	4.45474e-08	UP	no	NO
AT5G50450	1.06523	4.20303	4.22876e-10	5.03282e-08	UP	no	NO
AT1G69760	0.832536	5.01809	4.38253e-10	5.19746e-08	UP	no	NO
AT5G11720	0.624061	6.12696	4.39944e-10	5.19922e-08	UP	no	NO
AT3G62360	0.614024	6.68197	4.52048e-10	5.32357e-08	UP	no	NO
AT5G04720	0.965656	5.35266	4.65199e-10	5.45936e-08	UP	no	NO
AT1G05340	1.1502	4.95115	4.70696e-10	5.5047e-08	UP	no	NO
AT2G34510	1.1684	5.46819	4.73541e-10	5.5188e-08	UP	no	NO
AT2G36050	1.10163	3.48233	4.76274e-10	5.53151e-08	UP	no	NO
AT5G22920	1.41303	6.94957	5.07434e-10	5.87316e-08	UP	no	NO
AT1G15010	1.3563	1.63555	5.7526e-10	6.63539e-08	UP	no	NO
AT4G32590	-0.627931	5.59981	5.83212e-10	6.70416e-08	DOWN	no	NO
AT4G31060	0.898976	3.46696	6.12338e-10	7.01502e-08	UP	no	NO
AT4G01950	1.35558	5.36514	6.39269e-10	7.29872e-08	UP	no	NO
AT1G53540	3.67437	-0.0340934	6.47983e-10	7.37322e-08	UP	no	YES	1:19980355:G-A;exonic_variant
AT5G50950	1.2536	5.89797	6.5656e-10	7.44566e-08	UP	no	NO
AT1G44910	0.636922	5.33353	6.81679e-10	7.70457e-08	UP	yes	YES	1:16977617:C-CTT;intronic_variant
AT5G66800	1.45224	1.46293	7.34695e-10	8.276e-08	UP	no	NO
AT2G36895	-0.620356	5.52397	7.5287e-10	8.45247e-08	DOWN	no	NO
AT1G12240	1.09721	8.38117	7.83975e-10	8.74915e-08	UP	no	NO
AT1G13700	0.958925	4.4734	7.84491e-10	8.74915e-08	UP	no	NO
AT1G01120	0.947585	5.30883	8.10762e-10	9.0123e-08	UP	no	NO
AT4G27310	-0.590947	6.37334	8.22829e-10	9.11635e-08	DOWN	no	NO
AT5G59780	-0.721206	6.97756	8.31242e-10	9.17936e-08	DOWN	no	NO
AT5G24590	0.655149	4.82698	8.3652e-10	9.20746e-08	UP	no	NO
AT3G12140	0.575763	5.49579	8.57756e-10	9.41045e-08	UP	no	NO
AT2G31380	-1.08549	5.91606	9.17295e-10	1.0001e-07	DOWN	no	NO
AT1G22990	1.14657	4.24935	9.17519e-10	1.0001e-07	UP	no	NO
AT3G07255	3.06139	-1.60619	9.20866e-10	1.00051e-07	UP	no	NO
AT5G15350	0.958719	5.92556	9.27247e-10	1.0042e-07	UP	no	NO
AT5G44060	-0.913007	3.22367	9.90808e-10	1.06672e-07	DOWN	no	YES	5:17732291:A-AT;exonic_variant
AT1G02640	1.39368	4.54419	9.93336e-10	1.06672e-07	UP	no	NO
AT3G14210	-1.09123	8.32946	9.94474e-10	1.06672e-07	DOWN	no	NO
AT2G25770	2.18214	0.648259	1.02296e-09	1.09379e-07	UP	no	NO
AT4G33920	0.680275	4.9605	1.02797e-09	1.09566e-07	UP	no	NO
AT3G49530	0.78781	4.55784	1.07428e-09	1.13924e-07	UP	no	NO
AT5G27420	1.41964	3.23597	1.07851e-09	1.13924e-07	UP	no	NO
AT1G33760	4.05796	-1.28382	1.07899e-09	1.13924e-07	UP	no	NO
AT1G02860	0.723456	4.61848	1.0864e-09	1.14296e-07	UP	no	NO
AT4G10925	0.733816	4.33293	1.08931e-09	1.14296e-07	UP	no	NO
AT3G59330	-1.14115	2.56931	1.14225e-09	1.19479e-07	DOWN	no	NO
AT3G47340	1.22825	9.67336	1.15095e-09	1.20016e-07	UP	no	NO
AT5G45140	0.779882	4.8057	1.18427e-09	1.22885e-07	UP	no	NO
AT1G55920	-0.873974	5.89986	1.18577e-09	1.22885e-07	DOWN	no	NO
AT1G77640	2.21537	-0.163695	1.21542e-09	1.25573e-07	UP	no	NO
AT1G70280	0.700996	5.30815	1.23054e-09	1.26691e-07	UP	no	NO
AT4G03210	1.97199	6.63125	1.23377e-09	1.26691e-07	UP	no	NO
AT4G13340	1.64912	6.42096	1.3229e-09	1.3543e-07	UP	no	NO
AT3G47620	0.73904	6.83656	1.3798e-09	1.406e-07	UP	no	NO
AT1G68990	0.752584	4.53434	1.38174e-09	1.406e-07	UP	no	NO
AT1G19670	-1.30673	4.16749	1.40304e-09	1.42337e-07	DOWN	no	NO
AT1G30470	0.547418	6.32752	1.44176e-09	1.45826e-07	UP	no	NO
AT5G15700	0.845965	3.59443	1.4462e-09	1.45837e-07	UP	no	NO
AT1G49040	0.580882	5.89195	1.48063e-09	1.48863e-07	UP	no	YES	1:18142145:G-A;exonic_variant,1:18142145:G-A;protein_coding;sense;CGC>CGT;R>R
AT2G40000	1.43141	8.65069	1.56228e-09	1.56605e-07	UP	no	NO
AT5G45110	0.676723	4.86378	1.57713e-09	1.57624e-07	UP	no	NO
AT3G57450	0.964992	4.08403	1.73604e-09	1.72992e-07	UP	no	NO
AT2G15890	1.13885	8.35234	1.85628e-09	1.84429e-07	UP	no	NO
AT1G76650	2.26302	1.93155	1.98015e-09	1.96157e-07	UP	no	NO
AT4G01670	1.32611	2.38789	2.02859e-09	2.00366e-07	UP	no	YES	4:712350:C-T;protein_coding;sense;GGG>GGA;G>G
AT1G57990	1.86647	5.40653	2.03941e-09	2.00846e-07	UP	no	NO
AT1G11380	0.863258	3.59269	2.1633e-09	2.12313e-07	UP	no	NO
AT1G79110	-0.961988	3.38694	2.16845e-09	2.12313e-07	DOWN	no	NO
AT4G04940	1.04815	2.9776	2.18257e-09	2.13076e-07	UP	no	NO
AT1G03220	0.83833	6.01253	2.22903e-09	2.16982e-07	UP	no	NO
AT3G46600	1.46251	6.38914	2.35791e-09	2.28866e-07	UP	no	NO
AT4G18150	3.44252	-1.57618	2.40063e-09	2.32344e-07	UP	no	NO
AT2G38170	1.25521	7.97112	2.52899e-09	2.44066e-07	UP	no	NO
AT2G29210	0.563628	6.28921	2.57282e-09	2.47586e-07	UP	yes	NO
AT5G67300	1.45771	6.76846	2.5883e-09	2.48366e-07	UP	no	NO
AT3G27990	0.630745	4.64291	2.85891e-09	2.73176e-07	UP	no	NO
AT4G01250	1.29599	3.16172	2.86307e-09	2.73176e-07	UP	no	NO
AT4G21810	0.576372	6.08397	2.93056e-09	2.78825e-07	UP	no	NO
AT5G54280	0.631494	6.18069	3.01594e-09	2.8614e-07	UP	no	NO
AT2G46270	0.896986	6.05896	3.21167e-09	3.03855e-07	UP	no	NO
AT1G03090	1.23074	7.35262	3.26168e-09	3.07722e-07	UP	no	NO
AT1G02380	1.2838	2.96752	3.47661e-09	3.26507e-07	UP	no	NO
AT3G24530	0.658147	4.17338	3.48018e-09	3.26507e-07	UP	no	NO
AT3G06070	1.32086	5.84659	3.62229e-09	3.38896e-07	UP	no	NO
AT3G19680	2.78658	6.4895	3.66323e-09	3.41776e-07	UP	no	NO
AT5G53130	0.617682	6.2448	3.67551e-09	3.41975e-07	UP	no	NO
AT3G07740	0.659858	4.28916	3.69849e-09	3.43164e-07	UP	no	NO
AT1G62780	0.698876	6.61519	3.83226e-09	3.546e-07	UP	no	NO
AT1G68580	0.692093	5.80085	3.87169e-09	3.57267e-07	UP	no	NO
AT5G47370	0.749629	5.59976	3.91986e-09	3.60723e-07	UP	no	NO
AT1G28330	0.962458	7.84893	3.96088e-09	3.62909e-07	UP	no	NO
AT4G22350	0.650195	4.37306	3.96516e-09	3.62909e-07	UP	yes	NO
AT2G19810	0.962625	6.06127	4.32319e-09	3.94605e-07	UP	no	NO
AT4G33760	0.59349	5.47916	4.55495e-09	4.14636e-07	UP	no	NO
AT1G70290	0.972719	8.22876	4.96085e-09	4.50367e-07	UP	no	NO
AT4G32980	-0.68881	5.73658	4.97808e-09	4.50717e-07	DOWN	no	NO
AT1G22530	1.3341	6.04829	5.10643e-09	4.61098e-07	UP	no	NO
AT2G37470	0.636309	5.07971	5.41639e-09	4.87448e-07	UP	no	NO
AT5G52780	-0.740692	4.74124	5.42718e-09	4.87448e-07	DOWN	no	NO
AT2G44950	0.574561	5.50156	5.63647e-09	5.04899e-07	UP	no	NO
AT1G07985	1.68642	4.02537	5.66372e-09	5.05994e-07	UP	no	NO
AT1G78080	0.551616	7.60944	5.82878e-09	5.19363e-07	UP	no	NO
AT5G08330	0.9327	5.68808	5.84471e-09	5.19408e-07	UP	no	NO
AT2G42270	-0.74411	5.19703	6.11156e-09	5.41693e-07	DOWN	no	NO
AT1G11260	1.29685	9.06818	6.19773e-09	5.47889e-07	UP	no	NO
AT1G45201	-1.1515	6.04403	6.3465e-09	5.59571e-07	DOWN	no	NO
AT3G49780	0.93625	4.0969	6.64842e-09	5.84662e-07	UP	no	NO
AT2G47240	0.62732	5.73901	6.87808e-09	6.03283e-07	UP	no	NO
AT5G51810	1.10978	2.14276	6.98825e-09	6.11354e-07	UP	no	NO
AT4G03110	0.726835	5.28027	7.02148e-09	6.1267e-07	UP	no	NO
AT2G32160	-1.28262	2.26445	7.19735e-09	6.26393e-07	DOWN	no	NO
AT3G50430	0.697594	3.91439	7.53829e-09	6.52811e-07	UP	no	YES	3:18715661:G-GT;intronic_variant,3:18715661:G-GT;splice_donor_variant
AT3G45300	0.9394	7.48048	7.54789e-09	6.52811e-07	UP	no	NO
AT1G20070	-1.1916	2.28871	7.55905e-09	6.52811e-07	DOWN	no	NO
AT1G20920	-0.643508	5.97854	7.63603e-09	6.57772e-07	DOWN	no	NO
AT3G45443	0.714246	4.64276	7.94147e-09	6.82339e-07	UP	no	NO
AT3G17970	0.564255	5.27457	8.04001e-09	6.89047e-07	UP	no	NO
AT2G42380	1.00229	4.70679	8.08525e-09	6.91166e-07	UP	no	NO
AT1G09575	1.13675	2.72629	8.86232e-09	7.55675e-07	UP	no	NO
AT4G32030	0.623615	5.20268	9.15071e-09	7.78296e-07	UP	no	NO
AT4G28710	0.641081	5.63427	9.19218e-09	7.79853e-07	UP	no	NO
AT2G32885	1.62563	1.37029	9.22886e-09	7.80998e-07	UP	no	NO
AT3G44450	-1.96302	1.79812	9.30477e-09	7.85449e-07	DOWN	no	NO
AT4G37550	0.568912	6.99783	9.53782e-09	8.03108e-07	UP	no	NO
AT5G51390	1.03796	2.95258	9.94344e-09	8.33287e-07	UP	no	NO
AT2G27690	2.60254	2.94332	9.9457e-09	8.33287e-07	UP	no	NO
AT1G01420	-0.930091	3.41034	1.03842e-08	8.67864e-07	DOWN	no	NO
AT2G29500	1.79284	2.47559	1.06369e-08	8.86782e-07	UP	no	NO
AT5G04900	-0.588699	4.86903	1.07212e-08	8.91608e-07	DOWN	no	NO
AT2G27500	0.739536	5.21625	1.11887e-08	9.28195e-07	UP	no	NO
AT1G21130	0.775767	7.84695	1.16276e-08	9.62236e-07	UP	no	NO
AT2G27980	0.534878	5.82915	1.1731e-08	9.68408e-07	UP	no	NO
AT5G51190	2.14943	2.71328	1.20612e-08	9.93236e-07	UP	no	NO
AT1G61100	1.09045	6.7213	1.21555e-08	9.98562e-07	UP	no	NO
AT1G17970	0.637987	4.56543	1.24005e-08	1.01621e-06	UP	no	NO
AT3G12320	-0.968111	6.19115	1.2668e-08	1.03561e-06	DOWN	no	NO
AT2G24820	-0.568367	7.06098	1.27762e-08	1.04192e-06	DOWN	no	NO
AT5G65683	-0.910195	3.56497	1.29387e-08	1.05263e-06	DOWN	no	NO
AT1G08920	0.929433	5.23522	1.33747e-08	1.08548e-06	UP	no	NO
AT5G20980	0.662689	4.18976	1.36342e-08	1.10388e-06	UP	no	NO
AT1G70090	1.6958	5.50962	1.37442e-08	1.11011e-06	UP	no	NO
AT4G10470	-0.696879	3.66208	1.39717e-08	1.12579e-06	DOWN	no	NO
AT4G01330	0.630482	6.57952	1.4206e-08	1.14194e-06	UP	no	NO
AT3G53720	-0.622399	5.40546	1.44122e-08	1.15575e-06	DOWN	no	NO
AT4G02715	-0.581123	6.85999	1.46032e-08	1.16829e-06	DOWN	no	NO
AT1G30490	0.635082	5.37251	1.58718e-08	1.26678e-06	UP	no	NO
AT1G12780	0.722133	7.24552	1.64782e-08	1.31206e-06	UP	no	NO
AT1G33055	1.19291	4.04668	1.71951e-08	1.36592e-06	UP	no	NO
AT4G14270	0.659953	7.45632	1.76112e-08	1.39568e-06	UP	no	NO
AT4G14130	2.11893	5.93926	1.78631e-08	1.41231e-06	UP	no	NO
AT4G17500	1.26545	5.34651	1.83794e-08	1.44973e-06	UP	no	NO
AT1G30820	0.860758	5.42334	1.84362e-08	1.45082e-06	UP	no	NO
AT1G32240	-0.933371	2.98343	1.85506e-08	1.45641e-06	DOWN	no	NO
AT5G59550	0.692066	4.20874	1.86729e-08	1.46261e-06	UP	no	NO
AT3G52140	0.589145	6.71128	1.95054e-08	1.52427e-06	UP	no	NO
AT2G18410	0.719354	3.64116	1.9571e-08	1.52586e-06	UP	no	NO
AT3G04240	0.503179	6.95213	2.07276e-08	1.6123e-06	UP	no	NO
AT5G05140	0.659068	5.55357	2.10365e-08	1.63256e-06	UP	no	NO
AT2G22240	-0.617304	5.9424	2.10978e-08	1.63355e-06	DOWN	no	NO
AT1G03190	0.680612	3.97423	2.1312e-08	1.64635e-06	UP	no	NO
AT5G02290	0.620202	5.15943	2.15977e-08	1.66461e-06	UP	no	NO
AT1G79770	-1.11201	2.36538	2.19303e-08	1.68638e-06	DOWN	no	NO
AT3G08760	0.68087	5.17629	2.21796e-08	1.70167e-06	UP	no	YES	3:2660451:A-AT;intronic_variant,3:2660451:A-AT;exonic_variant
AT4G34150	0.842194	5.97857	2.24318e-08	1.7171e-06	UP	no	NO
AT4G16146	0.950913	4.43778	2.25191e-08	1.71988e-06	UP	no	YES	4:9143793:TA-T;intronic_variant,4:9143741:T-TA;intronic_variant
AT4G19040	0.571538	5.64677	2.26096e-08	1.72288e-06	UP	no	NO
AT5G25040	-0.762624	4.44317	2.35017e-08	1.78583e-06	DOWN	no	NO
AT5G50915	1.72599	3.55516	2.35418e-08	1.78583e-06	UP	no	NO
AT5G42200	0.979569	3.44466	2.4882e-08	1.88326e-06	UP	no	NO
AT1G15670	1.03537	4.73784	2.49557e-08	1.8846e-06	UP	no	NO
AT2G35290	1.71065	0.938412	2.53132e-08	1.90448e-06	UP	no	NO
AT5G13830	1.56043	0.426132	2.5332e-08	1.90448e-06	UP	no	NO
AT5G16120	0.538959	6.20925	2.56395e-08	1.92331e-06	UP	no	NO
AT3G01660	-0.887261	3.22183	2.63615e-08	1.97307e-06	DOWN	no	NO
AT3G04810	0.667564	5.83257	2.66134e-08	1.98751e-06	UP	no	NO
AT1G11700	-1.29284	3.74212	2.69488e-08	2.0081e-06	DOWN	no	NO
AT5G03470	0.634567	4.87525	2.70297e-08	2.00968e-06	UP	no	NO
AT5G12980	0.810868	3.58287	2.83559e-08	2.10365e-06	UP	no	NO
AT5G24380	-0.86966	5.57133	2.85385e-08	2.11254e-06	DOWN	no	NO
AT1G10140	0.722015	5.12846	2.90444e-08	2.14527e-06	UP	no	NO
AT3G11660	-0.634692	5.24451	2.95876e-08	2.18061e-06	DOWN	no	NO
AT5G16810	0.536383	5.226	3.03281e-08	2.23031e-06	UP	no	NO
AT3G10640	0.627867	4.50651	3.06993e-08	2.25268e-06	UP	no	NO
AT3G61870	-0.554276	7.3346	3.13074e-08	2.29232e-06	DOWN	no	NO
AT3G56880	0.803626	5.58607	3.26415e-08	2.38481e-06	UP	no	NO
AT4G15760	0.839811	6.88278	3.36966e-08	2.45657e-06	UP	no	YES	4:8974718:CT-C;exonic_variant,4:8974704:CT-C;exonic_variant,4:8974534:TC-T;exonic_variant&protein_coding
AT3G30380	0.694104	4.50475	3.387e-08	2.46388e-06	UP	no	NO
AT4G36140	0.607228	5.25478	3.44702e-08	2.50213e-06	UP	no	NO
AT1G53580	0.576562	7.41069	3.52082e-08	2.54743e-06	UP	no	NO
AT1G01390	-1.13722	1.99485	3.52454e-08	2.54743e-06	DOWN	no	NO
AT1G59860	2.21713	0.87295	3.57285e-08	2.57681e-06	UP	no	NO
AT3G23750	0.680198	5.89406	3.78918e-08	2.727e-06	UP	no	NO
AT3G20660	0.795212	3.92657	3.96676e-08	2.84871e-06	UP	no	NO
AT5G29000	0.641069	4.55205	3.9856e-08	2.85615e-06	UP	no	NO
AT5G15330	0.757129	4.00349	4.0999e-08	2.93182e-06	UP	no	NO
AT1G61890	0.929177	5.67574	4.17912e-08	2.98214e-06	UP	no	NO
AT4G23990	-0.837412	3.55528	4.24044e-08	3.0195e-06	DOWN	no	NO
AT1G79810	0.561754	4.74664	4.52319e-08	3.21404e-06	UP	no	NO
AT4G02070	0.613651	4.16765	4.55037e-08	3.22654e-06	UP	no	NO
AT4G30510	0.8311	3.58693	4.69628e-08	3.32301e-06	UP	no	NO
AT2G17510	0.526829	5.59784	4.77023e-08	3.36826e-06	UP	yes	NO
AT4G13810	-0.852042	4.41702	4.96343e-08	3.49735e-06	DOWN	no	NO
AT3G21700	-0.723817	3.41169	5.01639e-08	3.52728e-06	DOWN	no	NO
AT3G47800	0.858337	5.87144	5.08234e-08	3.56621e-06	UP	no	NO
AT5G35777	2.15602	4.34975	5.17007e-08	3.62023e-06	UP	no	NO
AT4G20860	0.779561	5.52037	5.53592e-08	3.86836e-06	UP	no	NO
AT3G61415	0.621144	4.23674	5.56795e-08	3.8827e-06	UP	no	YES	3:22723828:G-GA;splice_acceptor_region_variant
AT4G19690	4.52741	-0.126594	5.58972e-08	3.88982e-06	UP	no	NO
AT5G02020	0.893849	7.68855	5.65825e-08	3.92939e-06	UP	no	NO
AT4G15610	0.747866	4.92033	5.84956e-08	4.05389e-06	UP	no	NO
AT3G29670	1.13368	2.84084	5.93977e-08	4.10796e-06	UP	no	NO
AT2G28630	1.13175	4.47077	6.13877e-08	4.23688e-06	UP	no	NO
AT5G15550	0.671614	4.23219	6.19119e-08	4.26433e-06	UP	no	NO
AT5G07270	0.542701	5.12717	6.41183e-08	4.40729e-06	UP	no	NO
AT5G55700	0.677555	5.25229	6.43157e-08	4.41185e-06	UP	no	NO
AT4G18760	0.889118	3.86837	6.45988e-08	4.42226e-06	UP	no	YES	4:10307906:C-CT;exonic_variant
AT3G05370	-0.785222	3.39099	6.55555e-08	4.47865e-06	DOWN	no	NO
AT4G29900	0.564538	6.4423	6.57633e-08	4.48375e-06	UP	no	NO
AT3G07350	0.966479	6.4061	6.60754e-08	4.49593e-06	UP	no	NO
AT2G26190	0.719516	4.94079	6.66339e-08	4.52479e-06	UP	no	NO
AT4G27460	1.11599	2.49216	6.746e-08	4.57167e-06	UP	no	NO
AT5G45275	0.771854	3.94997	6.86967e-08	4.64613e-06	UP	no	NO
AT1G13260	1.04188	6.09637	7.04839e-08	4.75745e-06	UP	no	NO
AT2G35960	-0.865009	3.44237	7.29264e-08	4.91247e-06	DOWN	no	NO
AT3G02880	0.618518	4.9816	7.37838e-08	4.96031e-06	UP	no	NO
AT5G46710	1.04531	3.84094	7.47081e-08	5.01244e-06	UP	no	NO
AT5G03204	2.33644	-0.240309	7.61836e-08	5.10127e-06	UP	no	NO
AT2G46080	-0.551744	5.04408	7.87394e-08	5.26029e-06	DOWN	no	NO
AT1G80080	-0.717692	4.70659	7.88708e-08	5.26029e-06	DOWN	no	NO
AT3G23730	1.50004	5.39853	8.13138e-08	5.41251e-06	UP	no	NO
AT1G06720	0.680688	4.49365	8.18905e-08	5.44015e-06	UP	no	NO
AT3G16240	0.612825	9.82034	8.21849e-08	5.44896e-06	UP	no	NO
AT2G36410	0.66868	5.37273	8.31042e-08	5.49908e-06	UP	no	NO
AT5G14120	1.29477	7.32645	8.35027e-08	5.51462e-06	UP	no	NO
AT1G23030	1.24989	4.92765	8.40671e-08	5.54103e-06	UP	no	NO
AT2G23290	1.34096	4.02565	8.77755e-08	5.77255e-06	UP	no	NO
AT1G64780	-1.26486	4.4398	8.79225e-08	5.77255e-06	DOWN	no	NO
AT3G44310	-0.668228	9.47754	8.82021e-08	5.77964e-06	DOWN	no	NO
AT2G26810	0.673632	3.60302	9.21428e-08	6.02614e-06	UP	no	YES	2:11434437:A-C;exonic_variant,2:11434437:A-C;protein_coding;missense;GAT>GAG;D>E
AT3G16750	0.617206	4.27007	9.35955e-08	6.10928e-06	UP	no	NO
AT1G27730	1.42468	3.84951	9.51086e-08	6.19604e-06	UP	no	NO
AT4G32910	0.533891	5.41067	9.73036e-08	6.3268e-06	UP	no	NO
AT3G25740	-0.712649	3.84448	1.03217e-07	6.69836e-06	DOWN	no	NO
AT1G53165	0.534374	5.03995	1.06604e-07	6.90488e-06	UP	no	NO
AT5G44510	-0.53807	5.62577	1.08849e-07	7.03676e-06	DOWN	no	NO
AT1G32490	0.504119	6.05857	1.09622e-07	7.07315e-06	UP	yes	NO
AT3G28180	1.24304	6.2136	1.09996e-07	7.0837e-06	UP	no	NO
AT3G46640	1.08348	2.79091	1.11093e-07	7.14067e-06	UP	no	NO
AT3G07650	1.29101	1.60906	1.13531e-07	7.28349e-06	UP	no	NO
AT4G02130	0.828859	4.61393	1.13986e-07	7.296e-06	UP	no	NO
AT3G44260	1.32385	4.27978	1.14159e-07	7.296e-06	UP	no	NO
AT1G33610	0.985861	2.69788	1.18949e-07	7.58776e-06	UP	no	NO
AT5G22100	0.790327	3.1699	1.19473e-07	7.60672e-06	UP	no	NO
AT2G03240	0.674968	5.0992	1.21267e-07	7.70643e-06	UP	no	NO
AT1G23870	0.747767	6.613	1.27546e-07	8.08022e-06	UP	no	NO
AT1G11720	-0.552715	6.34978	1.27695e-07	8.08022e-06	DOWN	no	NO
AT3G54000	0.987966	2.88016	1.27869e-07	8.08022e-06	UP	no	YES	3:19996524:T-C;exonic_variant,3:19996515:G-GA;exonic_variant,3:19996522:T-C;exonic_variant
AT5G38150	-0.776993	4.62801	1.30039e-07	8.20196e-06	DOWN	no	NO
AT2G38220	2.45856	-0.627241	1.33524e-07	8.40603e-06	UP	no	NO
AT2G32800	0.824199	5.05647	1.34093e-07	8.42609e-06	UP	no	NO
AT2G47490	-0.617485	4.9489	1.36475e-07	8.55979e-06	DOWN	no	NO
AT1G70430	0.952005	2.41793	1.40476e-07	8.78208e-06	UP	no	NO
AT5G57630	0.75103	5.08571	1.4054e-07	8.78208e-06	UP	no	NO
AT3G23030	0.702147	7.17938	1.43441e-07	8.94676e-06	UP	no	NO
AT5G11740	0.870732	7.43469	1.46156e-07	9.09922e-06	UP	no	NO
AT5G61900	0.925108	3.64755	1.49346e-07	9.28069e-06	UP	no	NO
AT3G26310	-0.727898	4.50646	1.51091e-07	9.37184e-06	DOWN	no	NO
AT2G27080	1.35682	2.21286	1.5151e-07	9.38052e-06	UP	no	YES	2:11567247:A-AT;exonic_variant
AT2G46790	-0.943521	6.15901	1.53443e-07	9.46645e-06	DOWN	no	NO
AT5G01760	1.24063	1.33461	1.5346e-07	9.46645e-06	UP	no	NO
AT3G14120	0.589415	4.7673	1.55196e-07	9.54286e-06	UP	no	NO
AT3G05880	0.677559	7.12948	1.55265e-07	9.54286e-06	UP	no	NO
AT5G20250	1.60971	8.24078	1.57237e-07	9.64646e-06	UP	no	NO
AT3G13800	0.608615	3.88352	1.60946e-07	9.85605e-06	UP	no	NO
AT3G18535	0.553453	4.74345	1.68348e-07	1.02906e-05	UP	no	NO
AT3G21755	-1.09549	3.33311	1.81429e-07	1.10701e-05	DOWN	no	NO
AT2G35710	1.34657	1.2875	1.88316e-07	1.14696e-05	UP	no	NO
AT5G13960	0.668412	3.86356	1.89813e-07	1.15398e-05	UP	no	NO
AT5G09710	1.54792	0.243674	1.90936e-07	1.15872e-05	UP	no	NO
AT1G08650	-1.4856	4.70162	1.94515e-07	1.17832e-05	DOWN	no	NO
AT4G15670	1.38605	1.29549	1.96625e-07	1.18794e-05	UP	no	NO
AT1G55110	0.529181	5.73836	1.96808e-07	1.18794e-05	UP	no	NO
AT3G18160	0.548821	4.4093	1.99458e-07	1.20178e-05	UP	no	NO
AT4G31180	0.475038	6.79999	2.0765e-07	1.2489e-05	UP	no	NO
AT1G63810	0.726501	4.11162	2.08769e-07	1.2534e-05	UP	no	NO
AT5G38040	-1.11913	1.66231	2.14234e-07	1.28392e-05	DOWN	no	NO
AT1G22890	0.729014	4.27276	2.2184e-07	1.32552e-05	UP	no	NO
AT4G38120	0.517431	5.3212	2.22084e-07	1.32552e-05	UP	no	NO
AT5G52050	1.35352	2.75477	2.22357e-07	1.32552e-05	UP	no	NO
AT4G36900	0.650597	4.65957	2.25028e-07	1.33908e-05	UP	no	YES	4:17388763:C-CA;exonic_variant
AT4G25200	3.88205	-1.24619	2.28869e-07	1.35953e-05	UP	no	NO
AT5G49448	1.08541	6.29706	2.31294e-07	1.37152e-05	UP	no	NO
AT1G68670	0.647383	6.73149	2.31789e-07	1.37204e-05	UP	no	NO
AT5G21940	0.950747	7.45763	2.39186e-07	1.41334e-05	UP	no	NO
AT2G36400	0.714638	5.14545	2.42832e-07	1.43237e-05	UP	no	NO
AT1G48330	-0.935946	2.37547	2.45881e-07	1.44782e-05	DOWN	no	NO
AT5G43700	0.595402	6.80404	2.4749e-07	1.45475e-05	UP	no	NO
AT5G06690	0.861437	5.21777	2.50878e-07	1.47209e-05	UP	no	NO
AT5G18630	0.609375	6.66035	2.53394e-07	1.48427e-05	UP	no	NO
AT1G08930	1.57283	5.9641	2.56365e-07	1.49907e-05	UP	no	NO
AT3G61060	0.872527	6.40478	2.57317e-07	1.50203e-05	UP	no	NO
AT1G12990	0.674222	4.87961	2.63419e-07	1.53499e-05	UP	no	NO
AT5G19120	0.845635	7.81136	2.87311e-07	1.67068e-05	UP	no	NO
AT3G04110	-0.776836	3.7278	2.87697e-07	1.67068e-05	DOWN	no	NO
AT1G21000	0.682312	6.87167	2.88721e-07	1.67374e-05	UP	no	NO
AT4G10070	0.586995	4.57776	2.90599e-07	1.68173e-05	UP	no	NO
AT3G25600	0.878144	3.3698	2.95222e-07	1.70555e-05	UP	no	NO
AT1G51460	0.807045	3.37746	2.99172e-07	1.72541e-05	UP	no	YES	1:19080614:CTA-C;intronic_variant
AT1G13360	-0.597672	6.13324	3.05056e-07	1.75634e-05	DOWN	no	NO
AT4G15248	-2.913	2.0073	3.07324e-07	1.76638e-05	DOWN	no	NO
AT1G02610	1.26373	4.82798	3.12089e-07	1.79071e-05	UP	no	NO
AT5G65230	-1.75511	-0.133397	3.19537e-07	1.83033e-05	DOWN	no	NO
AT5G26622	-0.546347	4.75461	3.21119e-07	1.83626e-05	DOWN	no	NO
AT5G44870	-0.530138	4.51539	3.30869e-07	1.88881e-05	DOWN	no	NO
AT1G48100	-1.15795	4.34216	3.32317e-07	1.89387e-05	DOWN	no	NO
AT4G01860	0.545914	4.77913	3.33322e-07	1.89639e-05	UP	no	NO
AT3G53232	4.02977	-2.39884	3.39134e-07	1.9262e-05	UP	no	NO
AT1G80420	0.618937	5.41893	3.51303e-07	1.99196e-05	UP	no	NO
AT2G29120	-0.960852	2.78077	3.55252e-07	2.01097e-05	DOWN	no	NO
AT1G71000	3.44153	-0.92325	3.61169e-07	2.04103e-05	UP	no	NO
AT4G27410	1.11809	6.77925	3.64714e-07	2.05761e-05	UP	no	NO
AT3G07980	0.574387	4.47463	3.73021e-07	2.10096e-05	UP	no	NO
AT1G49750	-0.745526	5.83503	3.8215e-07	2.14878e-05	DOWN	no	NO
AT5G11170	0.479324	7.63697	3.83871e-07	2.15486e-05	UP	yes	NO
AT4G24780	-0.758645	5.77453	3.86378e-07	2.16532e-05	DOWN	no	NO
AT5G57550	2.49607	2.32156	3.89114e-07	2.17704e-05	UP	no	NO
AT3G52070	0.754797	4.03397	3.92523e-07	2.19246e-05	UP	no	NO
AT5G24210	1.42188	6.09476	3.97559e-07	2.21692e-05	UP	no	NO
AT1G07135	2.01829	2.95798	4.00651e-07	2.23047e-05	UP	no	NO
AT4G01070	-0.800565	5.03278	4.04246e-07	2.24677e-05	DOWN	no	NO
AT2G26980	0.633262	7.6621	4.12266e-07	2.28757e-05	UP	no	NO
AT5G42760	-1.48397	2.64322	4.13661e-07	2.29153e-05	DOWN	no	NO
AT1G20910	0.567695	4.11109	4.18267e-07	2.31324e-05	UP	no	NO
AT1G44350	1.45863	4.91957	4.29613e-07	2.3721e-05	UP	no	NO
AT3G20000	0.550122	5.64723	4.33086e-07	2.38736e-05	UP	no	NO
AT3G30720	-1.06629	3.53639	4.35439e-07	2.39641e-05	DOWN	no	NO
AT3G16720	1.16968	3.65448	4.47577e-07	2.45919e-05	UP	no	NO
AT5G54260	0.681086	3.66896	4.55057e-07	2.49622e-05	UP	no	NO
AT1G29670	0.584893	6.46239	4.59219e-07	2.51495e-05	UP	no	NO
AT2G42030	0.531332	5.39323	4.60939e-07	2.52027e-05	UP	no	NO
AT4G18880	0.649944	4.13489	4.64766e-07	2.53708e-05	UP	no	NO
AT3G18560	0.721061	3.91957	4.70736e-07	2.56551e-05	UP	no	NO
AT5G19730	-0.853324	4.20616	4.7332e-07	2.57543e-05	DOWN	no	NO
AT1G24170	1.12744	4.85295	4.7849e-07	2.59936e-05	UP	no	NO
AT5G66270	-1.06139	1.51846	4.84962e-07	2.63027e-05	DOWN	no	YES	5:26475248:G-GA;intronic_variant
AT4G17250	0.714817	4.72888	4.90221e-07	2.65453e-05	UP	no	NO
AT3G22886	1.51818	1.45302	4.93183e-07	2.66627e-05	UP	no	NO
AT1G67265	1.69452	1.46349	4.9463e-07	2.66981e-05	UP	no	NO
AT1G68840	0.916811	7.71243	5.03418e-07	2.7129e-05	UP	no	NO
AT3G10940	-0.618146	4.86332	5.04626e-07	2.71506e-05	DOWN	no	NO
AT2G24240	0.954456	4.1388	5.26435e-07	2.82342e-05	UP	no	NO
AT5G04760	0.600162	4.8841	5.26442e-07	2.82342e-05	UP	no	NO
AT4G23180	0.898461	5.31474	5.28438e-07	2.82962e-05	UP	no	NO
AT3G62070	1.24324	3.26434	5.33422e-07	2.84769e-05	UP	no	NO
AT4G17770	-0.661411	4.76598	5.33826e-07	2.84769e-05	DOWN	no	NO
AT4G02380	1.10669	8.69176	5.34708e-07	2.84769e-05	UP	no	NO
AT5G56250	-0.802288	4.10015	5.35195e-07	2.84769e-05	DOWN	no	NO
AT3G51530	0.659109	3.38183	5.45072e-07	2.89567e-05	UP	no	NO
AT5G04250	0.823702	2.90378	5.48093e-07	2.90713e-05	UP	no	NO
AT1G03310	-0.543206	6.29108	5.56696e-07	2.94812e-05	DOWN	no	NO
AT1G34315	-1.05644	2.19184	5.63113e-07	2.97743e-05	DOWN	no	NO
AT5G46270	-0.530726	4.6932	5.75982e-07	3.0407e-05	DOWN	no	NO
AT3G05640	0.72542	5.74413	5.84707e-07	3.07737e-05	UP	no	NO
AT4G25835	0.831776	4.01576	5.84756e-07	3.07737e-05	UP	no	NO
AT3G54600	-0.969709	5.10736	5.89752e-07	3.09721e-05	DOWN	no	NO
AT1G34760	0.57344	4.39128	5.90365e-07	3.09721e-05	UP	no	NO
AT4G26140	0.621062	4.22389	6.06474e-07	3.17677e-05	UP	no	NO
AT4G36500	0.841888	4.17407	6.43501e-07	3.36026e-05	UP	no	NO
AT2G46780	1.00815	3.31406	6.44252e-07	3.36026e-05	UP	no	NO
AT2G46870	-0.582699	4.8302	6.44497e-07	3.36026e-05	DOWN	no	NO
AT2G29165	-1.3916	-0.170422	6.52415e-07	3.39629e-05	DOWN	no	NO
AT2G42530	0.865362	4.09267	6.64588e-07	3.45432e-05	UP	no	NO
AT5G36940	-0.522217	4.76745	6.92671e-07	3.59474e-05	DOWN	no	NO
AT2G34357	0.541108	5.16374	7.15303e-07	3.70648e-05	UP	no	NO
AT3G21760	-0.815624	5.10599	7.19771e-07	3.7239e-05	DOWN	no	NO
AT1G78170	-0.896755	4.43878	7.31445e-07	3.7785e-05	DOWN	no	NO
AT1G12520	1.11085	5.35954	7.34439e-07	3.78815e-05	UP	no	NO
AT1G18570	0.737481	4.22655	7.411e-07	3.81667e-05	UP	no	NO
AT3G22840	-1.2295	2.82116	7.48403e-07	3.84839e-05	DOWN	no	NO
AT1G20330	0.575364	6.37912	7.5136e-07	3.85618e-05	UP	no	NO
AT1G32150	0.571583	4.53652	7.52208e-07	3.85618e-05	UP	no	NO
AT3G19670	0.482169	5.62731	7.61713e-07	3.89898e-05	UP	yes	NO
AT4G33030	-0.756401	6.59093	7.71719e-07	3.9442e-05	DOWN	no	NO
AT1G63360	-0.537294	4.90614	7.80245e-07	3.98173e-05	DOWN	no	NO
AT2G21210	-1.10553	5.2208	7.864e-07	4.00707e-05	DOWN	no	NO
AT4G01026	0.75378	5.22564	7.98439e-07	4.06227e-05	UP	no	NO
AT5G11200	0.496937	7.02527	8.03344e-07	4.08106e-05	UP	yes	NO
AT1G67910	0.7876	4.04539	8.34744e-07	4.23419e-05	UP	no	NO
AT5G63450	1.42166	4.67584	8.38394e-07	4.24631e-05	UP	no	NO
AT1G29690	0.731531	4.44065	8.46938e-07	4.28314e-05	UP	no	NO
AT1G54740	0.687636	6.13996	8.68613e-07	4.37998e-05	UP	no	NO
AT1G69160	-0.759635	5.77759	8.68688e-07	4.37998e-05	DOWN	no	NO
AT4G13900	-1.30208	3.69339	8.75858e-07	4.40953e-05	DOWN	no	YES	4:8036782:C-A;exonic_variant
AT5G57190	1.06039	2.25671	8.8748e-07	4.46137e-05	UP	no	NO
AT5G44190	-0.608406	7.94438	8.89357e-07	4.46415e-05	DOWN	no	NO
AT2G40475	-1.24811	3.73794	8.93695e-07	4.47925e-05	DOWN	no	NO
AT2G36420	0.691157	4.60511	9.04092e-07	4.52463e-05	UP	no	NO
AT3G16810	0.702924	3.94244	9.29898e-07	4.64504e-05	UP	no	NO
AT3G06380	0.490905	5.89299	9.30912e-07	4.64504e-05	UP	no	NO
AT1G10490	0.626287	4.36186	9.3643e-07	4.66567e-05	UP	no	NO
AT2G14050	-0.986693	2.07302	9.52287e-07	4.73766e-05	DOWN	no	YES	2:5913947:A-AG;exonic_variant,2:5913947:A-AG;exonic_variant&protein_coding
AT4G29110	-1.21948	2.64963	9.79609e-07	4.8664e-05	DOWN	no	NO
AT1G64500	-0.995464	6.49678	9.88102e-07	4.90136e-05	DOWN	no	NO
AT2G15960	0.587748	7.56576	9.90614e-07	4.9066e-05	UP	no	NO
AT5G67450	1.40095	0.627959	1.01015e-06	4.996e-05	UP	no	NO
AT1G14310	0.596474	4.16583	1.0234e-06	5.0496e-05	UP	no	NO
AT2G37030	1.90262	2.04749	1.02398e-06	5.0496e-05	UP	no	NO
AT1G16540	0.538348	4.35835	1.03465e-06	5.09474e-05	UP	no	NO
AT3G51400	1.41287	1.21734	1.04858e-06	5.15582e-05	UP	no	NO
AT4G05330	0.776169	3.54377	1.06685e-06	5.238e-05	UP	no	YES	4:2722525:A-G;intronic_variant
AT1G27880	1.01943	1.72226	1.07836e-06	5.2868e-05	UP	no	NO
AT4G26070	0.605514	3.93031	1.08274e-06	5.30053e-05	UP	no	NO
AT3G07770	0.553157	5.62557	1.08928e-06	5.32324e-05	UP	no	NO
AT3G04730	0.450501	7.98993	1.09054e-06	5.32324e-05	UP	no	NO
AT5G25210	0.975041	3.61121	1.10473e-06	5.37857e-05	UP	no	NO
AT2G34770	0.85246	5.63708	1.10507e-06	5.37857e-05	UP	no	NO
AT3G46230	2.92241	0.814232	1.10736e-06	5.38195e-05	UP	no	NO
AT3G15440	1.63216	0.63503	1.12815e-06	5.47509e-05	UP	no	NO
AT3G12810	0.489658	5.84629	1.15182e-06	5.58195e-05	UP	no	NO
AT1G08250	-0.823258	3.34932	1.16246e-06	5.62541e-05	DOWN	no	NO
AT2G34430	0.59727	10.9332	1.17308e-06	5.66865e-05	UP	no	NO
AT2G31880	0.636928	5.37056	1.18441e-06	5.70832e-05	UP	no	NO
AT3G14090	0.646682	4.40588	1.18468e-06	5.70832e-05	UP	no	NO
AT3G61260	0.495742	7.08204	1.18913e-06	5.71477e-05	UP	no	NO
AT2G23840	-0.503877	5.68265	1.18941e-06	5.71477e-05	DOWN	no	NO
AT4G34410	3.37534	0.11735	1.19205e-06	5.7193e-05	UP	no	NO
AT3G05490	0.892069	4.18233	1.207e-06	5.78276e-05	UP	no	NO
AT4G35100	0.481404	8.92071	1.2197e-06	5.83534e-05	UP	no	NO
AT1G15100	-0.966135	3.38854	1.24154e-06	5.9314e-05	DOWN	no	NO
AT5G43630	-0.505674	5.89741	1.26094e-06	6.01556e-05	DOWN	no	NO
AT2G46735	-0.748705	3.7799	1.27763e-06	6.08656e-05	DOWN	no	NO
AT1G26920	0.452116	6.34765	1.28063e-06	6.09224e-05	UP	no	NO
AT3G57940	0.765353	3.57891	1.35579e-06	6.44067e-05	UP	no	NO
AT4G15550	-0.692355	6.41712	1.37415e-06	6.5187e-05	DOWN	no	NO
AT5G26340	0.721336	4.79436	1.39047e-06	6.58683e-05	UP	no	NO
AT2G32150	0.581535	7.86547	1.39343e-06	6.59161e-05	UP	no	NO
AT4G12320	-0.988896	5.36587	1.40297e-06	6.62739e-05	DOWN	no	NO
AT2G41430	0.54383	9.43268	1.42528e-06	6.72338e-05	UP	no	NO
AT4G01575	1.61082	-0.266894	1.44358e-06	6.80018e-05	UP	no	NO
AT5G65207	0.669522	5.93221	1.44664e-06	6.80505e-05	UP	no	NO
AT5G43760	0.657469	6.03254	1.46086e-06	6.86237e-05	UP	no	NO
AT1G53875	-0.898768	3.479	1.48962e-06	6.98773e-05	DOWN	no	NO
AT2G27770	0.648581	4.29883	1.4929e-06	6.9934e-05	UP	no	NO
AT5G18440	0.630131	3.84149	1.49755e-06	7.0054e-05	UP	no	NO
AT3G63110	-1.33674	2.65775	1.50328e-06	7.02245e-05	DOWN	no	NO
AT2G44940	-1.13991	3.23263	1.51572e-06	7.07079e-05	DOWN	no	NO
AT1G55910	-0.700373	3.84221	1.54682e-06	7.20588e-05	DOWN	no	NO
AT5G23860	0.567928	5.85703	1.55663e-06	7.24157e-05	UP	no	NO
AT5G50180	-0.479866	5.2287	1.56779e-06	7.2834e-05	DOWN	no	NO
AT2G31790	-0.504894	5.81313	1.58004e-06	7.33021e-05	DOWN	no	NO
AT1G26800	0.553165	4.95318	1.61632e-06	7.48821e-05	UP	no	NO
AT5G02670	-0.534529	4.44006	1.62957e-06	7.53922e-05	DOWN	no	NO
AT2G18700	1.07344	7.42088	1.63377e-06	7.54828e-05	UP	no	NO
AT4G36980	-0.51657	6.94537	1.65384e-06	7.62133e-05	DOWN	no	NO
AT3G28920	-0.534023	4.65038	1.65411e-06	7.62133e-05	DOWN	no	NO
AT4G02760	0.648046	3.4057	1.65861e-06	7.63166e-05	UP	no	YES	4:1226101:G-A;splice_donor_region_variant
AT3G51480	-0.634488	3.60146	1.66223e-06	7.63788e-05	DOWN	no	NO
AT3G22460	0.624806	4.96648	1.67637e-06	7.68679e-05	UP	no	NO
AT3G18830	0.692075	5.44653	1.67744e-06	7.68679e-05	UP	no	NO
AT3G11440	0.752154	3.15662	1.69316e-06	7.74829e-05	UP	no	NO
AT3G57800	0.487671	5.40091	1.70378e-06	7.78629e-05	UP	no	NO
AT2G26150	1.54207	2.07247	1.71334e-06	7.81937e-05	UP	no	NO
AT4G15660	1.33455	1.76444	1.79044e-06	8.1602e-05	UP	no	NO
AT3G05900	0.560091	6.51186	1.80232e-06	8.20322e-05	UP	no	NO
AT2G26710	0.839711	3.31128	1.83585e-06	8.34458e-05	UP	no	NO
AT5G57100	0.612841	3.96778	1.84923e-06	8.39222e-05	UP	no	NO
AT5G43930	0.485815	5.10575	1.85132e-06	8.39222e-05	UP	no	NO
AT4G15690	0.928465	2.88936	1.87367e-06	8.48213e-05	UP	no	NO
AT5G05440	1.37952	4.98323	1.9076e-06	8.62415e-05	UP	no	NO
AT5G11800	0.626426	4.54332	1.93746e-06	8.7474e-05	UP	no	NO
AT4G26690	0.630198	6.01441	1.94339e-06	8.76208e-05	UP	no	NO
AT4G17950	0.492283	4.86623	1.94592e-06	8.76208e-05	UP	no	NO
AT2G30575	0.58777	4.02431	1.97337e-06	8.87382e-05	UP	no	NO
AT5G04370	1.01981	3.52054	2.00893e-06	9.01967e-05	UP	no	NO
AT5G22750	0.625256	3.68913	2.01116e-06	9.01967e-05	UP	no	NO
AT4G17230	0.678191	5.16341	2.04163e-06	9.1321e-05	UP	no	YES	4:9660901:A-AT;exonic_variant,4:9660907:C-CT;exonic_variant,4:9661411:A-T;protein_coding;missense;ATA>AAA;I>K
AT2G43100	-1.3392	4.69501	2.04165e-06	9.1321e-05	DOWN	no	YES	2:17921223:C-T;protein_coding;missense;TCG>TTG;S>L
AT5G13740	0.906787	5.97341	2.1303e-06	9.51601e-05	UP	no	NO
AT2G14080	-0.466775	5.65244	2.13519e-06	9.52522e-05	DOWN	no	NO
AT1G75230	0.918056	4.23386	2.15629e-06	9.6066e-05	UP	no	NO
AT3G20200	-0.936931	1.86519	2.2556e-06	0.000100341	DOWN	no	NO
AT4G14970	0.789397	2.76266	2.25819e-06	0.000100341	UP	no	YES	4:8559300:T-TG;splice_acceptor_region_variant
AT1G01510	0.460345	5.54883	2.27276e-06	0.000100855	UP	no	NO
AT3G52500	0.653967	5.97418	2.2778e-06	0.000100946	UP	no	NO
AT5G64550	-1.00325	3.3471	2.31794e-06	0.000102589	DOWN	no	NO
AT3G50700	0.65008	4.11599	2.36157e-06	0.000104383	UP	no	NO
AT3G59710	-1.6308	1.74634	2.37474e-06	0.000104828	DOWN	no	NO
AT2G43410	-0.483468	5.3615	2.38239e-06	0.000105028	DOWN	no	NO
AT2G47060	0.566651	5.06936	2.40423e-06	0.000105852	UP	no	NO
AT3G16840	0.461994	5.18235	2.46548e-06	0.000108407	UP	no	NO
AT2G37710	-0.522077	4.91917	2.49604e-06	0.000109608	DOWN	no	NO
AT5G51150	0.456216	5.61907	2.53802e-06	0.000111306	UP	no	NO
AT1G54050	1.16711	2.96689	2.55178e-06	0.000111764	UP	no	NO
AT4G09350	-0.882391	4.68227	2.57832e-06	0.00011278	DOWN	no	NO
AT4G27450	0.583063	8.0088	2.58765e-06	0.000113041	UP	no	NO
AT3G52800	0.518356	5.65469	2.63062e-06	0.000114769	UP	no	NO
AT3G61080	-0.437262	5.38333	2.64902e-06	0.000115423	DOWN	no	NO
AT1G76890	0.52646	5.51428	2.65877e-06	0.000115683	UP	no	NO
AT5G04770	0.858826	3.39489	2.66187e-06	0.000115683	UP	no	NO
AT4G29780	1.60745	3.45644	2.68173e-06	0.000116396	UP	no	NO
AT4G34630	-0.867358	4.92667	2.72606e-06	0.000118168	DOWN	no	NO
AT3G28930	-1.50683	2.27337	2.79316e-06	0.000120921	DOWN	no	NO
AT5G41240	0.512357	4.4387	2.80149e-06	0.000121126	UP	no	NO
AT1G73630	-1.06651	2.34331	2.87579e-06	0.000124179	DOWN	no	NO
AT2G17930	-0.51461	6.64126	2.92676e-06	0.000126218	DOWN	no	NO
AT5G67390	-0.735652	3.92902	2.94114e-06	0.000126676	DOWN	no	NO
AT1G22650	0.762868	4.1513	2.97429e-06	0.000127824	UP	no	NO
AT1G59590	1.06896	2.37582	2.97539e-06	0.000127824	UP	no	NO
AT1G03470	0.783528	2.90484	3.01248e-06	0.000129183	UP	no	NO
AT2G43870	-1.66715	2.02593	3.0147e-06	0.000129183	DOWN	no	NO
AT5G66080	0.596845	3.61428	3.03157e-06	0.000129741	UP	no	NO
AT4G22240	-0.519857	7.91041	3.04445e-06	0.000130127	DOWN	no	NO
AT3G60690	-0.639153	4.26444	3.06927e-06	0.000131022	DOWN	no	NO
AT2G18100	1.04393	2.27135	3.08616e-06	0.000131576	UP	no	NO
AT1G69360	0.493174	5.12508	3.10076e-06	0.000132031	UP	no	NO
AT1G52880	-0.705558	3.55241	3.1427e-06	0.000133648	DOWN	no	NO
AT2G39800	0.654614	11.0455	3.15832e-06	0.000134143	UP	no	NO
AT5G58430	0.511352	5.80418	3.18352e-06	0.000135043	UP	no	NO
AT5G04950	-0.607383	5.13214	3.27721e-06	0.000138843	DOWN	no	NO
AT1G64360	-1.85245	2.00938	3.39313e-06	0.000143573	DOWN	no	NO
AT1G73550	1.521	0.0795157	3.4098e-06	0.000144097	UP	no	NO
AT3G02140	0.996976	2.15063	3.4206e-06	0.000144372	UP	no	NO
AT1G20470	-1.28723	1.54658	3.43348e-06	0.000144735	DOWN	no	NO
AT5G19340	1.1243	3.87235	3.56579e-06	0.000150124	UP	no	NO
AT3G22961	2.02597	1.59374	3.58778e-06	0.000150861	UP	no	NO
AT1G10700	0.477521	4.68333	3.61154e-06	0.000151671	UP	no	NO
AT4G28150	0.717292	2.76603	3.63859e-06	0.000152617	UP	no	NO
AT5G64310	0.816314	4.31216	3.70345e-06	0.000155144	UP	no	NO
AT3G45630	0.41826	5.9678	3.73146e-06	0.000156123	UP	no	NO
AT2G25590	-0.675565	4.94476	3.73774e-06	0.000156182	DOWN	no	NO
AT4G36220	-0.612652	6.61539	3.74215e-06	0.000156182	DOWN	no	NO
AT2G31083	2.25708	0.673719	3.78716e-06	0.000157866	UP	no	NO
AT4G12420	0.607969	7.0245	3.80501e-06	0.000158414	UP	no	NO
AT5G65830	-0.769072	3.49851	3.85434e-06	0.000160269	DOWN	no	NO
AT5G23130	0.741818	3.11769	3.87126e-06	0.000160498	UP	no	NO
AT1G79160	-0.587786	4.96075	3.87243e-06	0.000160498	DOWN	no	NO
AT3G59820	0.588513	4.30131	3.87414e-06	0.000160498	UP	no	NO
AT5G26920	1.20072	2.81348	3.99412e-06	0.000165265	UP	no	NO
AT2G46440	-1.66616	0.0810471	4.02241e-06	0.000166232	DOWN	no	NO
AT4G34138	0.627928	6.14072	4.1018e-06	0.000169305	UP	no	NO
AT4G24800	0.526491	7.20481	4.21065e-06	0.000173585	UP	no	NO
AT1G49840	0.58999	3.95017	4.26872e-06	0.000175764	UP	no	NO
AT1G73990	-0.471542	5.68561	4.27914e-06	0.000175978	DOWN	no	NO
AT4G21670	-0.524366	4.70386	4.43312e-06	0.000182088	DOWN	no	YES	4:11515362:C-T;intronic_variant
AT1G10070	1.4507	5.55762	4.47053e-06	0.000183401	UP	no	NO
AT2G02100	0.797987	6.6312	4.57612e-06	0.000187504	UP	no	NO
AT1G69070	0.560233	4.38993	4.73602e-06	0.00019382	UP	no	NO
AT2G17250	0.577734	4.00343	4.75925e-06	0.000194534	UP	no	YES	2:7499969:G-A;intronic_variant
AT1G10020	1.26776	4.22231	4.80535e-06	0.000196181	UP	no	NO
AT1G20030	0.920464	3.53113	4.89696e-06	0.000199458	UP	no	NO
AT5G47220	1.40382	5.38977	4.89747e-06	0.000199458	UP	no	NO
AT1G17640	0.647649	3.31994	4.92535e-06	0.000200351	UP	yes	NO
AT2G38560	0.450631	5.07806	4.93928e-06	0.000200675	UP	no	NO
AT3G14590	0.597758	4.7514	4.96484e-06	0.000201453	UP	no	NO
AT1G77280	-0.7103	3.77394	4.97589e-06	0.000201453	DOWN	no	NO
AT5G63460	0.51665	4.70186	4.97635e-06	0.000201453	UP	no	NO
AT1G61340	1.01002	2.44278	5.03728e-06	0.000203674	UP	no	NO
AT1G05180	0.437935	5.15268	5.10901e-06	0.00020614	UP	no	NO
AT3G51180	-1.22636	1.17314	5.1105e-06	0.00020614	DOWN	no	YES	3:19013922:GT-G;intronic_variant
AT5G58650	0.653405	3.78921	5.21698e-06	0.000210183	UP	no	NO
AT3G21250	-0.684226	7.0891	5.26857e-06	0.000212008	DOWN	no	NO
AT2G26511	-1.06741	1.04418	5.34365e-06	0.000214772	DOWN	no	NO
AT1G21580	-0.489066	6.43078	5.46905e-06	0.000219551	DOWN	no	NO
AT1G61970	-0.66577	3.53869	5.48177e-06	0.000219799	DOWN	no	NO
AT4G10060	0.478756	6.99693	5.50804e-06	0.000220396	UP	no	YES	4:6294476:C-T;protein_coding;missense;TCT>TTT;S>F,4:6294476:C-T;exonic_variant
AT1G77140	0.491437	4.68125	5.50973e-06	0.000220396	UP	no	NO
AT1G19400	0.46262	7.03112	5.63487e-06	0.000224914	UP	no	NO
AT5G19820	0.419525	6.73514	5.63605e-06	0.000224914	UP	no	NO
AT5G67160	-1.7337	0.434611	5.67002e-06	0.000225617	DOWN	no	NO
AT4G31550	0.616182	5.10407	5.6701e-06	0.000225617	UP	no	NO
AT1G79410	-1.0412	2.47288	5.67376e-06	0.000225617	DOWN	no	NO
AT1G49650	0.58955	3.93055	5.68732e-06	0.00022589	UP	no	NO
AT1G12710	0.827858	3.26932	5.8934e-06	0.000233605	UP	no	NO
AT2G23130	1.43353	5.46244	5.89543e-06	0.000233605	UP	no	NO
AT3G47540	-0.868868	2.43988	5.9198e-06	0.000234295	DOWN	no	NO
AT4G33940	0.491617	4.5169	5.99031e-06	0.000236807	UP	no	NO
AT5G45820	-0.547258	5.8844	6.07948e-06	0.00024005	DOWN	no	NO
AT2G41090	-1.04943	5.24523	6.1063e-06	0.000240827	DOWN	no	NO
AT1G02475	-0.494905	5.6782	6.21787e-06	0.00024494	DOWN	no	NO
AT1G59910	0.507667	4.54682	6.27025e-06	0.000246432	UP	no	NO
AT1G21550	1.65411	0.997074	6.27038e-06	0.000246432	UP	no	NO
AT1G70700	1.3203	7.12039	6.31527e-06	0.000247908	UP	no	NO
AT1G55330	0.673749	5.70136	6.32366e-06	0.000247948	UP	no	NO
AT3G58900	-0.702847	3.65342	6.33308e-06	0.000248028	DOWN	no	NO
AT5G39860	-1.40202	2.14455	6.35186e-06	0.000248475	DOWN	no	NO
AT1G27670	1.24894	2.65485	6.36786e-06	0.000248812	UP	no	NO
AT3G48530	0.465509	6.9504	6.42285e-06	0.000250256	UP	no	NO
AT5G43190	0.710636	4.42304	6.42548e-06	0.000250256	UP	no	NO
AT4G26610	0.476604	5.11996	6.43148e-06	0.000250256	UP	no	NO
AT1G17145	0.492901	5.00393	6.43453e-06	0.000250256	UP	no	NO
AT1G05690	-0.865004	2.43887	6.45943e-06	0.000250934	DOWN	no	NO
AT3G54320	0.804465	2.92168	6.48371e-06	0.000251587	UP	no	NO
AT4G30825	-0.461999	4.65965	6.5772e-06	0.000254921	DOWN	no	NO
AT1G12470	0.433651	5.62737	6.70221e-06	0.000259468	UP	no	YES	1:4257148:C-T;protein_coding;missense;CTC>TTC;L>F,1:4257148:C-T;exonic_variant
AT1G13670	0.836684	3.21431	6.72119e-06	0.000259904	UP	no	NO
AT3G10150	-1.38399	1.04786	6.89535e-06	0.000266333	DOWN	no	NO
AT2G42247	-0.674077	3.42172	7.01736e-06	0.000270735	DOWN	no	NO
AT2G35950	0.811189	2.97633	7.02611e-06	0.000270762	UP	no	NO
AT1G57680	0.826274	6.22806	7.11677e-06	0.000273943	UP	no	NO
AT5G55840	-0.731847	2.91294	7.25046e-06	0.00027877	DOWN	no	NO
AT1G80190	0.594568	3.93885	7.30691e-06	0.000280621	UP	no	NO
AT5G16890	0.558809	3.87285	7.48812e-06	0.000287252	UP	no	NO
AT1G60140	0.480667	6.8847	7.52518e-06	0.000288345	UP	no	NO
AT1G68935	-1.0618	1.52923	7.56262e-06	0.000289451	DOWN	no	NO
AT2G45135	-2.33503	0.2393	7.60767e-06	0.000290844	DOWN	no	NO
AT1G21670	0.534962	5.64903	7.66745e-06	0.000292798	UP	no	NO
AT1G02650	1.07057	0.64678	7.68063e-06	0.000292969	UP	no	NO
AT4G17240	0.621626	3.73998	7.76949e-06	0.000296023	UP	no	YES	4:9666689:TC-T;exonic_variant,4:9667453:T-TA;intronic_variant,4:9667734:AG-A;splice_acceptor_region_variant,4:9667734:AG-A;intronic_variant,4:9668369:G-GT;exonic_variant
AT1G01950	0.497596	4.61531	7.7884e-06	0.000296408	UP	no	NO
AT4G34280	0.474561	5.04142	7.84143e-06	0.000297779	UP	no	NO
AT1G75770	0.727347	3.32915	7.84212e-06	0.000297779	UP	no	NO
AT3G51238	2.33759	-1.25071	7.86934e-06	0.000298157	UP	no	NO
AT3G22540	-1.121	1.38252	7.86976e-06	0.000298157	DOWN	no	NO
AT4G14500	0.436289	6.22908	7.91125e-06	0.000299392	UP	no	NO
AT3G04030	-1.00038	2.22023	7.96879e-06	0.000301231	DOWN	no	NO
AT2G41060	-0.50455	5.388	8.06052e-06	0.000304357	DOWN	yes	NO
AT1G66840	-0.62333	4.47135	8.09272e-06	0.000305231	DOWN	no	NO
AT4G15030	0.563427	4.29177	8.11344e-06	0.00030567	UP	yes	YES	4:8579423:A-AT;intronic_variant,4:8579396:AG-A;intronic_variant,4:8579430:G-GT;intronic_variant,4:8579403:T-C;intronic_variant,4:8579450:C-CT;intronic_variant,4:8579427:G-GT;intronic_variant
AT1G26220	-0.545696	4.46576	8.25866e-06	0.000310793	DOWN	no	NO
AT4G30910	0.4746	4.96545	8.27782e-06	0.000311167	UP	no	NO
AT2G41210	0.583645	5.12498	8.32817e-06	0.00031271	UP	no	NO
AT4G37190	0.573772	4.19434	8.39895e-06	0.000315017	UP	no	NO
AT4G28880	0.418427	6.70902	8.48927e-06	0.00031805	UP	no	NO
AT1G73870	-0.567121	6.37891	8.72532e-06	0.00032653	DOWN	no	NO
AT1G65070	-0.518734	4.88545	8.74469e-06	0.000326892	DOWN	no	NO
AT5G58510	0.450249	5.27938	8.7726e-06	0.000327572	UP	no	NO
AT1G34370	0.429159	6.26657	8.79925e-06	0.000328203	UP	no	NO
AT2G39400	0.584246	6.5888	8.86791e-06	0.000330398	UP	no	NO
AT2G09990	0.475749	5.67899	8.88042e-06	0.000330499	UP	no	NO
AT2G11000	0.44653	4.99917	8.98363e-06	0.000333971	UP	no	NO
AT1G66540	-0.963304	2.94982	9.09024e-06	0.000337562	DOWN	no	NO
AT4G22217	-3.90915	-2.68058	9.15407e-06	0.000339557	DOWN	no	NO
AT4G37925	-0.54881	6.72911	9.24887e-06	0.000342697	DOWN	no	NO
AT1G53200	0.619995	3.11286	9.33985e-06	0.000345687	UP	no	NO
AT1G52080	-0.664968	3.11816	9.46831e-06	0.000350057	DOWN	no	YES	1:19369980:G-A;intronic_variant
AT5G43740	-0.503158	4.59101	9.73018e-06	0.000359344	DOWN	no	NO
AT4G24350	-0.667169	4.74513	9.76102e-06	0.000360089	DOWN	no	NO
AT1G74090	-0.620892	5.37671	9.80151e-06	0.000361016	DOWN	no	NO
AT1G22882	0.873183	4.64717	9.8076e-06	0.000361016	UP	no	NO
AT1G29320	0.70304	3.08039	1.00741e-05	0.00037042	UP	no	NO
AT5G24470	0.814677	3.5686	1.02184e-05	0.000375317	UP	no	NO
AT1G76410	0.878543	3.07353	1.02968e-05	0.000377786	UP	no	NO
AT5G45472	-0.920676	2.11178	1.03799e-05	0.000380419	DOWN	no	NO
AT4G00820	-0.791968	3.53884	1.0439e-05	0.000382168	DOWN	no	NO
AT1G59218	-0.653231	5.20681	1.04771e-05	0.000382831	DOWN	no	NO
AT5G17490	1.0525	2.78376	1.04866e-05	0.000382831	UP	no	NO
AT5G18150	0.778597	2.32697	1.04912e-05	0.000382831	UP	no	NO
AT3G59020	0.427274	6.30222	1.05137e-05	0.000383239	UP	no	NO
AT1G76090	0.844105	5.26017	1.05281e-05	0.000383346	UP	no	NO
AT4G25810	1.20039	3.39003	1.06051e-05	0.000385708	UP	no	NO
AT1G80630	0.518987	4.10204	1.06238e-05	0.000385708	UP	no	NO
AT1G58180	0.55671	6.74414	1.06273e-05	0.000385708	UP	no	NO
AT4G08110	0.442605	5.05343	1.06705e-05	0.00038686	UP	no	NO
AT1G49780	0.901684	3.90936	1.07005e-05	0.000387157	UP	no	NO
AT3G54100	0.552913	4.0634	1.07017e-05	0.000387157	UP	no	NO
AT5G44430	-8.26619	-2.02118	1.07246e-05	0.000387571	DOWN	no	NO
AT1G80410	0.397498	6.84723	1.07726e-05	0.000388888	UP	no	NO
AT1G10550	3.02791	1.80097	1.07886e-05	0.000389049	UP	no	NO
AT2G31810	0.705457	6.38965	1.0863e-05	0.000391313	UP	no	NO
AT2G34660	-0.535334	6.47656	1.0889e-05	0.000391476	DOWN	no	YES	2:14607171:C-T;protein_coding;stop-gain;CAG>TAG;Q>*
AT5G47240	1.22049	4.9531	1.0903e-05	0.000391476	UP	no	NO
AT1G08910	0.444224	5.01703	1.09061e-05	0.000391476	UP	no	YES	1:2859036:A-AC;exonic_variant,1:2859036:A-AC;exonic_variant&protein_coding
AT4G26670	0.597608	4.13675	1.0914e-05	0.000391476	UP	no	NO
AT2G23180	-0.703346	3.72946	1.09618e-05	0.00039277	DOWN	no	NO
AT2G37630	-0.480886	5.17599	1.1078e-05	0.000396099	DOWN	no	NO
AT3G43200	4.40657	-2.72452	1.10782e-05	0.000396099	UP	no	NO
AT5G45310	0.821243	4.90595	1.11049e-05	0.000396633	UP	no	NO
AT1G16130	1.05428	1.36289	1.12915e-05	0.000402514	UP	no	NO
AT4G14240	-0.536552	4.73895	1.13023e-05	0.000402514	DOWN	no	NO
AT3G14220	-0.641843	5.02176	1.13054e-05	0.000402514	DOWN	no	NO
AT1G29500	0.979505	3.45128	1.15098e-05	0.000409357	UP	no	NO
AT1G02620	1.54228	1.43544	1.17184e-05	0.000416338	UP	no	NO
AT4G05070	0.615138	7.46945	1.18448e-05	0.000420384	UP	no	NO
AT1G27290	0.495803	6.64919	1.18879e-05	0.00042147	UP	no	NO
AT4G33650	0.418937	5.36455	1.20015e-05	0.000425048	UP	no	NO
AT2G31060	0.502378	4.84777	1.20341e-05	0.000425756	UP	no	NO
AT2G46330	0.8608	6.24547	1.20806e-05	0.000426954	UP	no	NO
AT1G07400	1.57451	2.18106	1.21752e-05	0.000429847	UP	no	NO
AT1G80480	0.416929	5.6442	1.22991e-05	0.000433766	UP	no	NO
AT4G16700	0.948196	1.36647	1.23706e-05	0.00043583	UP	no	NO
AT4G27100	0.522742	4.16499	1.23967e-05	0.000436295	UP	no	NO
AT2G48070	-0.460238	5.66168	1.24498e-05	0.000437707	DOWN	no	NO
AT1G69750	0.47329	4.97698	1.26658e-05	0.000444466	UP	no	NO
AT1G66150	0.467203	7.06774	1.26685e-05	0.000444466	UP	no	NO
AT4G13920	-1.65112	1.0237	1.27484e-05	0.000446803	DOWN	no	NO
AT3G10190	0.714909	2.85635	1.28328e-05	0.000449293	UP	no	NO
AT3G62570	1.39038	2.97656	1.28969e-05	0.000451069	UP	no	NO
AT5G18170	0.624067	6.55349	1.2928e-05	0.000451688	UP	no	NO
AT4G04223	0.993387	3.09573	1.3023e-05	0.000454535	UP	no	NO
AT4G27360	-1.65728	-0.232991	1.31007e-05	0.000456776	DOWN	no	NO
AT4G02680	-0.418345	5.3506	1.3121e-05	0.00045701	DOWN	no	NO
AT5G37710	0.641351	4.01623	1.32927e-05	0.00046251	UP	no	NO
AT2G41510	-1.53264	1.82854	1.33773e-05	0.000464976	DOWN	no	NO
AT1G70520	0.598145	5.2351	1.34108e-05	0.00046566	UP	no	NO
AT5G40920	0.596928	4.09549	1.34512e-05	0.00046658	UP	no	NO
AT1G69730	-0.968172	3.63582	1.34651e-05	0.000466582	DOWN	no	NO
AT3G11820	0.614179	4.4548	1.36786e-05	0.000473493	UP	no	NO
AT4G30810	-0.479776	5.19298	1.38855e-05	0.000480163	DOWN	no	NO
AT5G66675	0.484464	4.85434	1.39882e-05	0.000483215	UP	no	NO
AT1G72060	1.74001	3.90271	1.40246e-05	0.00048398	UP	no	NO
AT5G38880	0.447694	5.50412	1.41057e-05	0.000486277	UP	no	NO
AT2G47760	0.509029	4.27995	1.41521e-05	0.000487379	UP	no	NO
AT5G37540	0.688694	3.90573	1.42366e-05	0.000489789	UP	no	NO
AT2G27420	-2.27423	1.50286	1.43785e-05	0.000494164	DOWN	no	NO
AT1G58200	0.469309	6.20898	1.44832e-05	0.000497255	UP	no	NO
AT1G67060	0.473555	4.17269	1.45554e-05	0.000499227	UP	no	NO
AT5G22290	0.666792	4.67802	1.46159e-05	0.000500791	UP	no	NO
AT3G12110	0.735205	3.7697	1.46926e-05	0.000502908	UP	no	NO
AT1G22470	1.74345	-0.0321753	1.47919e-05	0.000505794	UP	no	NO
AT1G23480	0.911422	4.429	1.48717e-05	0.000508005	UP	no	NO
AT5G57655	0.731684	7.99357	1.49418e-05	0.000509882	UP	no	NO
AT1G72450	1.34559	6.94483	1.51118e-05	0.000515164	UP	no	NO
AT4G03260	-0.399847	7.27801	1.54538e-05	0.000526287	DOWN	no	NO
AT4G34560	-0.777737	3.77653	1.56302e-05	0.00053176	DOWN	no	NO
AT1G55450	0.854057	4.92511	1.57919e-05	0.000536716	UP	no	NO
AT1G71130	-0.602383	3.85342	1.6004e-05	0.000543377	DOWN	no	NO
AT3G63140	-0.406507	8.45722	1.63135e-05	0.000553327	DOWN	no	NO
AT3G20340	0.875241	2.93937	1.63362e-05	0.000553453	UP	no	NO
AT5G18540	0.72913	2.34757	1.635e-05	0.000553453	UP	no	NO
AT2G21080	-0.777564	3.98524	1.64407e-05	0.000555963	DOWN	no	NO
AT3G30775	1.07504	4.3317	1.65443e-05	0.000558904	UP	no	NO
AT2G40080	1.32927	-0.0451646	1.65685e-05	0.000559161	UP	no	NO
AT2G18160	-0.5203	6.32878	1.66606e-05	0.000561707	DOWN	no	NO
AT1G07640	-0.668202	5.00895	1.67563e-05	0.000564369	DOWN	no	YES	1:2355512:C-T;protein_coding;missense;AGA>AAA;R>K,1:2355512:C-T;exonic_variant
AT3G17609	-0.756295	3.89683	1.70354e-05	0.000573195	DOWN	no	NO
AT3G24982	-3.84899	-2.71042	1.70597e-05	0.000573441	DOWN	no	YES	3:9106874:GGACAAGCTTGTCGACGGCCGGCCGCGGCCGGCCGTC-G;intronic_variant&splice_donor_region_variant&splice_acceptor_region_variant&exonic_variant&splice_acceptor_variant&protein_coding
AT1G71480	-0.502218	5.68972	1.71498e-05	0.000575896	DOWN	no	NO
AT1G12480	-0.789818	3.53208	1.7217e-05	0.000577574	DOWN	no	NO
AT1G69530	-0.967383	7.55136	1.73131e-05	0.000579916	DOWN	no	NO
AT2G27060	-0.479712	4.96051	1.73212e-05	0.000579916	DOWN	no	NO
AT1G31040	1.17398	1.94315	1.75643e-05	0.000587473	UP	no	NO
AT1G67920	0.865782	2.57702	1.77665e-05	0.000593643	UP	no	NO
AT3G23540	0.41842	5.53622	1.785e-05	0.000595844	UP	no	NO
AT3G02380	-1.26352	5.71999	1.78707e-05	0.000595944	DOWN	no	NO
AT4G36410	0.734804	3.85321	1.79646e-05	0.000598339	UP	no	NO
AT4G14340	0.472507	5.15922	1.79781e-05	0.000598339	UP	no	NO
AT4G02350	0.497676	5.14642	1.80251e-05	0.000599314	UP	no	NO
AT5G62090	0.476918	6.22782	1.81058e-05	0.000600981	UP	no	NO
AT3G61150	0.500648	4.80843	1.8111e-05	0.000600981	UP	no	NO
AT1G66180	0.496453	7.54144	1.81426e-05	0.000601341	UP	no	NO
AT1G80930	0.399361	6.62921	1.81575e-05	0.000601341	UP	yes	NO
AT4G36640	-0.801154	3.71462	1.82848e-05	0.000604791	DOWN	no	NO
AT1G24706	0.393949	6.2576	1.82976e-05	0.000604791	UP	yes	YES	1:8745970:C-T;intronic_variant
AT1G15820	-0.395263	11.6728	1.8482e-05	0.000610285	DOWN	no	NO
AT1G26790	-2.87432	-2.40538	1.85826e-05	0.000612609	DOWN	no	NO
AT3G55880	0.862934	3.58265	1.85887e-05	0.000612609	UP	no	NO
AT1G49800	-2.50463	-2.08224	1.87419e-05	0.000617005	DOWN	no	NO
AT5G44420	-9.37273	-0.828995	1.87726e-05	0.000617005	DOWN	no	NO
AT3G51870	0.660792	4.09928	1.8777e-05	0.000617005	UP	no	NO
AT5G53890	-0.500457	4.6276	1.88865e-05	0.000619996	DOWN	no	NO
AT5G10695	0.921033	1.98119	1.89213e-05	0.000620532	UP	no	NO
AT1G18020	0.995922	5.23115	1.89879e-05	0.000622112	UP	no	NO
AT2G38300	-0.649814	4.29952	1.90481e-05	0.000623479	DOWN	no	NO
AT3G07460	0.664086	5.89525	1.95235e-05	0.000638419	UP	no	NO
AT3G04640	1.13615	2.80027	1.97777e-05	0.000646102	UP	no	NO
AT3G04760	-0.4302	6.13903	1.9911e-05	0.000649829	DOWN	no	NO
AT1G18890	0.448711	5.03151	2.02975e-05	0.000661802	UP	no	NO
AT3G21020	-1.22112	0.0734758	2.04977e-05	0.00066748	DOWN	no	NO
AT3G45640	0.565091	6.21663	2.05113e-05	0.00066748	UP	no	NO
AT5G61160	-5.89949	-0.0187811	2.06428e-05	0.00067057	DOWN	no	NO
AT5G03355	1.86848	1.44871	2.06461e-05	0.00067057	UP	no	NO
AT2G32390	-0.765541	2.88684	2.08491e-05	0.000676511	DOWN	no	NO
AT3G04310	-0.653074	2.96895	2.09598e-05	0.000679447	DOWN	no	NO
AT5G58980	-0.774704	3.51223	2.1102e-05	0.000683402	DOWN	no	NO
AT2G28500	1.07857	0.668114	2.12088e-05	0.00068513	UP	no	NO
AT2G32230	-0.443425	6.20174	2.12103e-05	0.00068513	DOWN	no	NO
AT4G15700	0.884697	2.58345	2.12164e-05	0.00068513	UP	no	NO
AT2G46070	-0.438882	5.13249	2.1406e-05	0.000690588	DOWN	no	NO
AT2G40860	-0.472771	4.24201	2.15299e-05	0.000693921	DOWN	no	NO
AT5G09820	0.512633	4.50909	2.16328e-05	0.000696572	UP	no	NO
AT3G17130	-1.02602	0.727647	2.21283e-05	0.00071136	DOWN	no	NO
AT1G79820	0.590473	4.01239	2.21343e-05	0.00071136	UP	no	NO
AT1G12580	0.409246	5.72646	2.22507e-05	0.000714419	UP	no	NO
AT1G30690	0.556359	5.79094	2.2769e-05	0.000730364	UP	no	NO
AT4G38860	-0.726102	5.57528	2.28287e-05	0.000731583	DOWN	no	NO
AT1G06560	0.59136	3.74196	2.30392e-05	0.000737626	UP	no	NO
AT3G11090	-0.638636	4.22409	2.32159e-05	0.000742579	DOWN	no	NO
AT1G04730	0.810664	2.59443	2.33394e-05	0.000745822	UP	no	NO
AT1G17060	0.978828	2.89482	2.3852e-05	0.000761477	UP	no	YES	1:5833053:C-CA;exonic_variant,1:5833053:C-CA;intronic_variant,1:5833053:C-CA;exonic_variant&protein_coding
AT4G11330	0.45248	4.75361	2.38923e-05	0.000762043	UP	no	NO
AT2G14560	-5.795	-0.869052	2.40516e-05	0.000766388	DOWN	no	NO
AT4G27670	4.19373	-2.74148	2.40779e-05	0.000766388	UP	no	NO
AT2G01850	0.702628	7.83433	2.40968e-05	0.000766388	UP	no	NO
AT4G24570	1.70653	2.67243	2.48543e-05	0.000789735	UP	no	NO
AT1G24020	-0.877321	4.85262	2.49761e-05	0.000792856	DOWN	no	NO
AT4G31120	0.543345	4.62822	2.51972e-05	0.000798449	UP	yes	NO
AT2G15820	-0.495673	4.36969	2.51997e-05	0.000798449	DOWN	no	NO
AT3G12340	0.679005	3.08392	2.53374e-05	0.000802059	UP	no	NO
AT1G61900	0.422133	5.4279	2.54949e-05	0.000806287	UP	no	NO
AT1G51400	-0.402064	9.07263	2.5752e-05	0.000813652	DOWN	no	NO
AT1G13160	0.475658	4.30895	2.62154e-05	0.000827517	UP	no	NO
AT1G76560	0.684107	3.55098	2.63007e-05	0.000829433	UP	no	NO
AT2G41110	0.542975	5.10508	2.63925e-05	0.000831549	UP	no	NO
AT3G58120	1.10108	5.69765	2.67392e-05	0.000841686	UP	no	NO
AT5G40340	0.465391	6.17049	2.71052e-05	0.000852409	UP	no	NO
AT3G15270	1.32853	0.112012	2.74075e-05	0.000861111	UP	no	NO
AT1G16170	0.466373	4.6217	2.7677e-05	0.000868768	UP	no	NO
AT1G30530	-0.696414	4.16415	2.79757e-05	0.000877326	DOWN	no	NO
AT3G13530	0.454231	5.40815	2.80811e-05	0.000879813	UP	no	NO
AT2G40930	0.396927	5.47419	2.81128e-05	0.000879987	UP	no	NO
AT2G31740	0.482248	4.68655	2.81939e-05	0.000881706	UP	no	NO
AT1G52800	-1.16924	0.551021	2.83476e-05	0.000885607	DOWN	no	NO
AT1G23730	-1.81716	4.15212	2.83712e-05	0.000885607	DOWN	no	NO
AT1G62400	-0.72107	2.30912	2.84873e-05	0.000888408	DOWN	no	NO
AT3G53990	0.548673	6.88753	2.86588e-05	0.000892929	UP	no	NO
AT3G05180	-0.454198	5.04071	2.953e-05	0.000919223	DOWN	no	NO
AT3G62750	-0.442923	7.31688	3.02519e-05	0.000940827	DOWN	no	NO
AT5G15870	0.543124	3.56105	3.03689e-05	0.000943259	UP	no	NO
AT3G19290	0.549536	6.5164	3.03861e-05	0.000943259	UP	no	NO
AT2G20250	0.60171	3.60772	3.06283e-05	0.000949901	UP	no	NO
AT5G14470	1.67496	2.25342	3.07667e-05	0.000953315	UP	no	NO
AT3G04443	-0.82169	2.24732	3.08194e-05	0.000954069	DOWN	no	NO
AT1G51175	5.63576	-2.88513	3.08661e-05	0.00095464	UP	no	NO
AT1G09710	0.653954	3.49497	3.10838e-05	0.00096014	UP	no	NO
AT1G73010	-3.06589	3.66294	3.1101e-05	0.00096014	DOWN	no	NO
AT2G43650	0.517378	4.58478	3.14887e-05	0.000971217	UP	no	NO
AT4G24805	0.557033	3.66475	3.17885e-05	0.000979568	UP	no	NO
AT3G50590	0.415864	6.6721	3.23479e-05	0.000995895	UP	no	NO
AT1G19610	1.19836	0.536701	3.24004e-05	0.000996601	UP	no	NO
AT1G22570	0.941124	3.65832	3.246e-05	0.000997523	UP	no	NO
AT3G55630	0.522965	6.61646	3.31688e-05	0.00101838	UP	no	NO
AT1G23740	-0.508251	8.1074	3.36276e-05	0.00103152	DOWN	no	NO
AT3G18490	-0.450574	8.28115	3.41159e-05	0.00104555	DOWN	no	NO
AT3G11720	0.593708	4.06986	3.45418e-05	0.00105764	UP	no	NO
AT2G24540	-0.976712	5.01571	3.50494e-05	0.00107139	DOWN	no	NO
AT3G01500	-0.466865	10.9471	3.50546e-05	0.00107139	DOWN	no	YES	3:195336:TCCTGCATTTATCAATACATTTATATTGTTATATATGATCAGCTCATCGATCTAACATGTGTTTGTATA-T;exonic_variant,3:195336:TCCTGCATTTATCAATACATTTATATTGTTATATATGATCAGCTCATCGATCTAACATGTGTTTGTATA-T;intronic_variant&splice_acceptor_region_variant&splice_donor_region_variant&splice_acceptor_variant&splice_donor_variant,3:195336:TCCTGCATTTATCAATACATTTATATTGTTATATATGATCAGCTCATCGATCTAACATGTGTTTGTATA-T;intronic_variant&spl…
AT1G64760	0.728142	3.00108	3.57496e-05	0.00109164	UP	no	NO
AT3G60965	-0.701251	2.77319	3.61735e-05	0.00110359	DOWN	no	NO
AT2G28190	1.85673	6.16096	3.64347e-05	0.00111055	UP	no	NO
AT2G41880	0.52976	3.69878	3.65614e-05	0.0011134	UP	no	NO
AT1G74930	2.35113	3.01074	3.66708e-05	0.00111573	UP	no	NO
AT2G28600	0.486862	3.96603	3.67621e-05	0.00111749	UP	no	NO
AT5G03830	-0.514055	4.05274	3.73731e-05	0.00113504	DOWN	no	NO
AT5G47230	1.23756	3.02887	3.77709e-05	0.00114609	UP	no	NO
AT1G04350	-0.45612	6.64524	3.79715e-05	0.00115114	DOWN	no	NO
AT4G37610	1.23945	5.21745	3.8034e-05	0.00115116	UP	no	NO
AT1G06630	0.45135	4.56072	3.80403e-05	0.00115116	UP	no	NO
AT4G17098	-1.17062	1.70429	3.87434e-05	0.00117138	DOWN	no	YES	4:9609626:GT-G;intronic_variant,4:9610634:CT-C;exonic_variant
AT2G19860	0.528344	5.16002	3.92803e-05	0.00118655	UP	no	NO
AT4G33060	0.416326	4.75342	3.96012e-05	0.00119517	UP	yes	NO
AT3G26450	-0.491323	6.90981	3.97587e-05	0.00119885	DOWN	no	NO
AT5G66650	0.854913	3.88261	3.99933e-05	0.00120458	UP	no	NO
AT1G58280	-1.14086	3.4317	4.00229e-05	0.00120458	DOWN	no	NO
AT5G26740	0.486095	5.07733	4.00562e-05	0.00120458	UP	no	NO
AT2G24640	0.484691	4.04583	4.07662e-05	0.00122484	UP	no	NO
AT5G58390	-1.10221	3.51169	4.08967e-05	0.00122767	DOWN	no	NO
AT5G15190	0.987383	3.1955	4.18407e-05	0.00125489	UP	no	NO
AT1G53830	1.16416	2.99881	4.2456e-05	0.00127221	UP	no	NO
AT1G16400	-1.21862	4.25018	4.25943e-05	0.00127522	DOWN	no	NO
AT3G16850	0.42531	6.54527	4.30797e-05	0.0012886	UP	no	NO
AT1G48110	-0.418749	5.29888	4.32387e-05	0.00129221	DOWN	no	NO
AT2G35470	0.71226	3.81814	4.33188e-05	0.00129346	UP	no	NO
AT2G32500	-0.545248	5.07785	4.33928e-05	0.00129384	DOWN	no	NO
AT1G10120	0.572234	4.95894	4.34083e-05	0.00129384	UP	no	NO
AT5G56795	-1.52209	-0.489401	4.34939e-05	0.00129524	DOWN	no	NO
AT1G32570	-2.16279	-1.91223	4.35627e-05	0.00129542	DOWN	no	NO
AT1G58590	-0.967062	1.51891	4.36014e-05	0.00129542	DOWN	no	NO
AT1G11210	0.837429	4.47548	4.36155e-05	0.00129542	UP	no	NO
AT1G71030	-0.533479	7.47198	4.36585e-05	0.00129542	DOWN	no	NO
AT1G64950	-0.426701	6.36168	4.36923e-05	0.00129542	DOWN	no	NO
AT2G47790	0.498137	4.29932	4.38756e-05	0.00129971	UP	no	NO
AT1G08830	1.15539	5.80338	4.41365e-05	0.00130629	UP	no	NO
AT5G19280	0.39692	5.02158	4.42664e-05	0.00130899	UP	no	YES	5:6492392:T-TA;intronic_variant
AT3G16530	-2.40975	2.40011	4.44232e-05	0.00131181	DOWN	no	NO
AT4G26600	0.707246	3.01845	4.44399e-05	0.00131181	UP	no	NO
AT1G15520	-6.06443	0.627225	4.4572e-05	0.00131456	DOWN	no	NO
AT3G57350	0.495963	4.3011	4.5232e-05	0.00133259	UP	no	YES	3:21222414:AG-A;splice_acceptor_region_variant
AT4G09460	0.573218	4.10993	4.52626e-05	0.00133259	UP	no	NO
AT1G62380	-0.654291	9.74577	4.53317e-05	0.00133346	DOWN	no	NO
AT1G50730	0.389229	5.36113	4.53766e-05	0.00133362	UP	no	YES	1:18801893:GT-G;splice_donor_region_variant
AT5G27990	0.460689	4.28625	4.55553e-05	0.0013377	UP	no	NO
AT5G62910	0.461205	4.35571	4.66075e-05	0.00136741	UP	no	NO
AT3G13450	0.816168	6.18546	4.685e-05	0.00137333	UP	no	NO
AT2G18260	0.692305	3.01701	4.7212e-05	0.00138274	UP	no	NO
AT4G35470	0.483287	6.0627	4.7344e-05	0.0013853	UP	no	NO
AT3G52540	-1.02491	0.668637	4.73818e-05	0.0013853	DOWN	no	NO
AT1G59980	0.53968	3.5667	4.7482e-05	0.00138703	UP	no	NO
AT3G05630	-1.44604	2.97215	4.76417e-05	0.00139049	DOWN	no	NO
AT5G14350	-0.761248	2.19904	4.92179e-05	0.00143524	DOWN	no	NO
AT5G66070	0.726925	3.37394	4.93777e-05	0.00143866	UP	no	NO
AT3G62200	-0.513413	3.57556	4.94569e-05	0.00143972	DOWN	no	NO
AT1G65800	-0.475131	5.10232	5.06494e-05	0.00147316	DOWN	no	NO
AT1G17960	1.08797	1.12727	5.09255e-05	0.00147992	UP	no	YES	1:6181512:T-TG;intronic_variant
AT5G20200	0.410214	5.05009	5.10737e-05	0.00148294	UP	no	NO
AT3G45890	0.541445	3.90549	5.11673e-05	0.00148438	UP	no	NO
AT3G08030	0.374761	7.37138	5.12741e-05	0.00148553	UP	no	NO
AT4G17880	-0.715688	4.21932	5.12951e-05	0.00148553	DOWN	no	NO
AT5G20990	0.379921	5.83481	5.20303e-05	0.00150553	UP	no	NO
AT1G25380	0.437724	4.69294	5.21979e-05	0.00150908	UP	no	NO
AT1G74020	-0.658994	4.10638	5.36692e-05	0.00155029	DOWN	no	NO
AT1G75370	0.39711	6.44099	5.40035e-05	0.0015586	UP	no	NO
AT3G59060	0.417727	7.99115	5.41442e-05	0.00156133	UP	no	NO
AT2G05210	-0.501612	4.33345	5.43115e-05	0.00156481	DOWN	no	NO
AT5G49525	1.05582	1.96982	5.45315e-05	0.00156981	UP	no	NO
AT2G26010	-9.48354	-0.832841	5.53203e-05	0.00159115	DOWN	no	YES	2:11087342:C-T;exonic_variant
AT4G12690	0.620416	3.66727	5.55769e-05	0.00159717	UP	no	NO
AT1G17290	0.439602	7.37453	5.58334e-05	0.00160317	UP	no	NO
AT1G03230	0.514736	4.47801	5.61622e-05	0.00161124	UP	no	NO
AT2G16586	0.611163	5.48248	5.62795e-05	0.0016119	UP	no	NO
AT4G33300	0.511692	6.07628	5.62807e-05	0.0016119	UP	no	YES	4:16055028:T-TA;intronic_variant
AT2G18790	-0.379678	6.16561	5.64611e-05	0.00161569	DOWN	no	NO
AT5G66740	-1.41139	0.194213	5.69459e-05	0.00162818	DOWN	no	NO
AT1G65310	1.15398	2.88294	5.77391e-05	0.0016484	UP	no	NO
AT5G18190	0.377358	6.38682	5.77607e-05	0.0016484	UP	no	NO
AT4G13770	-1.13088	6.66494	5.77999e-05	0.0016484	DOWN	no	NO
AT1G69550	-0.397821	4.93476	5.81752e-05	0.0016577	DOWN	no	NO
AT5G19900	-0.494161	4.69481	5.86115e-05	0.00166872	DOWN	no	NO
AT2G01290	-0.623676	4.5751	5.90907e-05	0.00168094	DOWN	no	NO
AT4G30240	0.473259	4.03826	5.92552e-05	0.0016842	UP	no	NO
AT1G68050	1.0842	0.534155	6.00638e-05	0.00170574	UP	no	NO
AT5G61380	0.594807	4.62307	6.08161e-05	0.00172565	UP	no	NO
AT5G57850	-0.431065	5.31751	6.09357e-05	0.00172702	DOWN	no	NO
AT5G10150	0.491329	4.70524	6.09669e-05	0.00172702	UP	no	NO
AT2G18120	-1.03754	0.730114	6.13986e-05	0.00173779	DOWN	no	NO
AT1G44125	-0.69478	2.67332	6.16033e-05	0.00174212	DOWN	no	NO
AT5G27560	-0.375992	5.66507	6.19564e-05	0.00175063	DOWN	no	NO
AT1G34640	-0.562572	3.21687	6.21186e-05	0.00175374	DOWN	no	NO
AT5G56750	0.410425	5.4534	6.21957e-05	0.00175445	UP	no	NO
AT4G05150	0.374233	7.80787	6.27068e-05	0.00176739	UP	no	NO
AT5G06820	1.15823	0.332783	6.30749e-05	0.00177628	UP	no	NO
AT2G19800	0.947078	3.87075	6.31882e-05	0.00177681	UP	no	NO
AT1G70100	0.387153	5.71966	6.31995e-05	0.00177681	UP	no	NO
AT4G10910	0.759427	3.08744	6.32718e-05	0.00177736	UP	no	NO
AT3G44717	3.41507	-2.80586	6.42394e-05	0.00180304	UP	no	NO
AT3G08770	-0.793634	4.29354	6.46185e-05	0.00181217	DOWN	no	NO
AT1G20515	-1.9223	-1.16563	6.48209e-05	0.00181633	DOWN	no	NO
AT5G14520	0.442206	5.24998	6.49111e-05	0.00181735	UP	no	NO
AT2G29160	-2.64569	-2.0494	6.49894e-05	0.00181803	DOWN	no	NO
AT1G20090	0.483453	5.9136	6.51775e-05	0.00182178	UP	no	NO
AT1G08630	1.1316	4.20918	6.54336e-05	0.00182742	UP	no	NO
AT5G65080	1.42947	0.627439	6.59878e-05	0.00184137	UP	no	NO
AT1G18740	0.576997	4.67824	6.6081e-05	0.00184245	UP	no	NO
AT1G66760	0.476057	7.17251	6.62796e-05	0.00184645	UP	no	NO
AT1G19720	-0.406905	6.35946	6.6469e-05	0.0018502	DOWN	no	NO
AT5G23880	0.538636	4.30434	6.68005e-05	0.00185533	UP	yes	NO
AT3G05345	-0.425721	5.40158	6.68073e-05	0.00185533	DOWN	no	NO
AT3G16710	0.79456	2.30929	6.68185e-05	0.00185533	UP	no	NO
AT5G25520	-0.375387	5.72844	6.71495e-05	0.00186298	DOWN	no	NO
AT1G03060	-0.422004	5.75552	6.74742e-05	0.00187045	DOWN	no	NO
AT1G76080	-0.473888	8.01403	6.77219e-05	0.00187451	DOWN	no	NO
AT4G11280	1.35909	4.45819	6.7753e-05	0.00187451	UP	no	NO
AT4G27300	-0.516911	6.10545	6.77876e-05	0.00187451	DOWN	no	NO
AT1G23080	-0.446086	7.52265	6.82506e-05	0.00188544	DOWN	no	NO
AT5G47040	0.396485	7.86229	6.82949e-05	0.00188544	UP	no	NO
AT2G25840	0.388323	5.43099	6.86877e-05	0.00189473	UP	no	NO
AT5G14570	0.580229	3.93543	6.90337e-05	0.00190272	UP	no	NO
AT4G23570	0.466625	5.05636	6.97289e-05	0.00192031	UP	no	NO
AT1G75580	-1.17812	2.73286	6.9824e-05	0.00192136	DOWN	no	NO
AT2G32400	-0.625126	3.43907	6.99656e-05	0.00192368	DOWN	no	NO
AT1G03590	0.411355	5.05047	7.02071e-05	0.00192875	UP	no	YES	1:895475:G-GA;splice_acceptor_region_variant
AT3G63400	0.394133	5.44973	7.03409e-05	0.00192961	UP	yes	NO
AT5G49530	0.404836	4.71952	7.03531e-05	0.00192961	UP	no	NO
AT1G11150	-0.706895	2.67192	7.14618e-05	0.00195842	DOWN	no	NO
AT1G52510	-0.391789	6.87983	7.18677e-05	0.00196795	DOWN	no	NO
AT2G44120	0.46637	6.90998	7.22563e-05	0.00197693	UP	no	NO
AT1G31130	0.395032	6.14123	7.23132e-05	0.00197693	UP	no	NO
AT1G75830	-8.41393	-1.7408	7.28313e-05	0.00198948	DOWN	no	NO
AT3G51910	0.728941	2.95217	7.29845e-05	0.00199205	UP	no	NO
AT1G74210	-1.14491	3.59131	7.44994e-05	0.00203175	DOWN	no	NO
AT3G56260	-1.17691	1.19411	7.55084e-05	0.0020576	DOWN	no	NO
AT4G13150	-0.412709	4.62816	7.60177e-05	0.00206981	DOWN	no	NO
AT2G19250	-0.62636	3.24131	7.661e-05	0.00208292	DOWN	no	NO
AT4G32650	0.703698	3.79764	7.66228e-05	0.00208292	UP	no	YES	4:15754060:A-AT;intronic_variant
AT2G30020	0.683691	3.57013	7.75498e-05	0.00210642	UP	no	NO
AT2G01480	0.462164	4.58793	7.85473e-05	0.00213179	UP	no	NO
AT3G23110	-1.44561	0.694344	7.94251e-05	0.00215388	DOWN	no	NO
AT2G29420	-0.714929	4.17979	7.96896e-05	0.00215931	DOWN	no	NO
AT5G66200	0.592578	5.43973	8.04958e-05	0.00217941	UP	no	NO
AT5G22730	0.500765	3.94575	8.07863e-05	0.00218551	UP	no	NO
AT2G33250	-0.420537	5.1379	8.1059e-05	0.00219113	DOWN	no	NO
AT5G63180	-0.658298	5.13037	8.1172e-05	0.00219155	DOWN	no	NO
AT4G15850	0.664728	2.15064	8.12048e-05	0.00219155	UP	no	YES	4:9001900:C-CT;intronic_variant
AT5G41410	-0.531893	4.28474	8.13719e-05	0.0021943	DOWN	no	NO
AT1G29340	0.373309	5.65438	8.14522e-05	0.00219471	UP	no	NO
AT1G79529	1.27239	2.49686	8.16858e-05	0.00219799	UP	no	NO
AT2G03090	-0.749205	3.51198	8.17044e-05	0.00219799	DOWN	no	NO
AT5G52640	0.920652	4.32618	8.19945e-05	0.00220363	UP	no	NO
AT5G53420	-0.663042	5.1918	8.20448e-05	0.00220363	DOWN	no	NO
AT1G50360	0.428411	4.93858	8.33908e-05	0.002238	UP	no	NO
AT4G28240	-0.603408	6.42766	8.40343e-05	0.00225259	DOWN	no	NO
AT5G23870	0.705766	4.4854	8.40682e-05	0.00225259	UP	no	NO
AT1G74450	0.608665	3.35774	8.46439e-05	0.00226621	UP	no	NO
AT1G70780	0.453511	6.94765	8.47527e-05	0.00226732	UP	no	NO
AT3G15354	-0.544226	6.30769	8.50236e-05	0.00227276	DOWN	no	NO
AT2G33570	0.910308	3.97374	8.51592e-05	0.00227458	UP	no	NO
AT5G49690	0.85607	3.76174	8.52905e-05	0.00227628	UP	no	NO
AT3G61820	-0.757826	5.11779	8.59481e-05	0.00229202	DOWN	no	NO
AT2G26020	-5.13563	-2.34319	8.6292e-05	0.00229937	DOWN	no	NO
AT5G44580	-0.414049	7.40343	8.6499e-05	0.00230306	DOWN	no	NO
AT1G67750	-0.610026	3.79983	8.65722e-05	0.00230319	DOWN	no	NO
AT5G15810	0.454323	4.86948	8.70348e-05	0.00231367	UP	no	NO
AT5G49480	-0.895326	4.67954	8.75858e-05	0.00232648	DOWN	no	NO
AT2G06850	0.918299	7.65516	8.8982e-05	0.00236171	UP	no	NO
AT4G38470	0.810401	6.77773	8.90748e-05	0.00236231	UP	no	YES	4:17999421:C-T;exonic_variant
AT2G36480	0.389221	4.83337	8.91681e-05	0.00236292	UP	no	NO
AT3G43600	-0.450507	5.46208	8.93285e-05	0.00236531	DOWN	no	NO
AT1G78476	-1.49336	-0.960258	8.94761e-05	0.00236736	DOWN	no	NO
AT1G78340	1.03748	1.47637	8.95875e-05	0.00236844	UP	no	NO
AT5G40740	0.448495	4.74242	9.00734e-05	0.00237942	UP	no	NO
AT1G68190	0.450631	6.46978	9.11682e-05	0.00240646	UP	no	NO
AT4G11570	-0.441512	7.60888	9.2293e-05	0.00243424	DOWN	no	NO
AT5G59080	0.559229	5.49147	9.24229e-05	0.00243575	UP	no	NO
AT3G01180	-0.384212	5.85638	9.27196e-05	0.00244153	DOWN	no	NO
AT1G75280	-0.935826	6.00573	9.27961e-05	0.00244153	DOWN	no	NO
AT1G03457	0.802976	2.80198	9.28593e-05	0.00244153	UP	yes	YES	1:863646:G-GA;intronic_variant,1:863622:G-GA;intronic_variant,1:863622:G-GA;exonic_variant,1:863646:G-GA;exonic_variant
AT5G21160	0.501895	6.25689	9.30094e-05	0.00244356	UP	no	NO
AT1G49510	0.421562	5.08369	9.31909e-05	0.00244642	UP	no	NO
AT5G19780	0.555517	6.81514	9.35253e-05	0.00245329	UP	no	NO
AT4G02550	0.620949	3.2006	9.55814e-05	0.00250528	UP	no	NO
AT3G13180	0.420643	5.29863	9.5697e-05	0.00250635	UP	no	NO
AT5G23050	0.545765	5.57317	9.58941e-05	0.00250957	UP	no	NO
AT5G41100	0.607577	3.71975	9.60018e-05	0.00251043	UP	no	NO
AT1G15800	0.629795	3.3995	9.64166e-05	0.00251932	UP	no	NO
AT2G40340	1.93882	-1.03821	9.70155e-05	0.00253301	UP	no	NO
AT1G50600	0.385504	5.99935	9.78205e-05	0.00255205	UP	no	NO
AT1G53885	1.61789	4.98223	9.79418e-05	0.00255323	UP	no	NO
AT3G10060	-0.466721	6.4741	9.81469e-05	0.0025566	DOWN	no	NO
AT2G24550	0.551632	5.98015	9.86722e-05	0.0025683	UP	no	NO
AT3G61580	0.412091	8.1243	9.95439e-05	0.00258899	UP	no	NO
AT3G49620	-3.60431	0.888657	9.9705e-05	0.00259118	DOWN	no	NO
AT3G58070	-1.54851	0.882219	9.98243e-05	0.00259228	DOWN	no	NO
AT2G01918	0.666534	4.25146	0.000100152	0.00259878	UP	no	NO
AT1G17100	-0.528544	5.67654	0.000100755	0.00260879	DOWN	no	NO
AT5G52250	0.666071	3.99273	0.000100806	0.00260879	UP	no	NO
AT2G38610	0.426659	4.94631	0.00010083	0.00260879	UP	no	NO
AT1G11050	0.612812	3.7886	0.000100848	0.00260879	UP	no	NO
AT4G03230	-0.485415	4.23211	0.000101185	0.00261535	DOWN	no	NO
AT1G62250	-0.456721	5.37092	0.000101256	0.00261535	DOWN	no	NO
AT1G19380	1.17711	2.17397	0.000101562	0.00262096	UP	no	NO
AT1G63830	0.507174	4.52189	0.000101629	0.00262096	UP	no	NO
AT2G31970	0.357195	5.53599	0.000102947	0.00265291	UP	no	YES	2:13608610:C-T;exonic_variant,2:13608610:C-T;protein_coding;sense;CGC>CGT;R>R
AT5G58260	-0.429001	6.02169	0.000103046	0.00265344	DOWN	no	NO
AT2G39030	-4.98796	-0.240475	0.000103138	0.00265378	DOWN	no	NO
AT1G49720	0.5379	4.06034	0.000103417	0.00265891	UP	no	NO
AT5G20120	0.415536	4.59421	0.000103579	0.00266106	UP	no	NO
AT2G18950	-0.459863	4.49784	0.000103852	0.00266602	DOWN	no	NO
AT2G40610	-0.758813	6.32313	0.000104886	0.00269053	DOWN	no	NO
AT3G50800	1.17578	2.34944	0.000105034	0.00269228	UP	no	NO
AT3G20010	0.504211	4.43062	0.00010548	0.00270166	UP	no	NO
AT5G48240	0.564762	3.60842	0.00010644	0.00272417	UP	no	NO
AT5G57565	0.412078	4.47974	0.000106726	0.00272942	UP	no	NO
AT2G46240	0.656927	3.85729	0.000107807	0.00275154	UP	no	NO
AT5G57910	0.557199	3.66724	0.000107827	0.00275154	UP	no	NO
AT4G34030	0.528659	6.92365	0.000107836	0.00275154	UP	no	NO
AT2G32830	-1.60239	-0.000515713	0.000108256	0.0027584	DOWN	no	NO
AT1G12440	0.362259	6.84654	0.000108269	0.0027584	UP	no	NO
AT1G29660	0.68387	5.49163	0.000108413	0.00275901	UP	no	YES	1:10373778:G-GT;exonic_variant
AT3G50630	-0.639207	2.86021	0.000108457	0.00275901	DOWN	no	NO
AT5G56170	0.423667	5.64273	0.000108835	0.00276655	UP	no	NO
AT3G48810	-0.670917	2.41036	0.000109003	0.00276873	DOWN	no	NO
AT1G17345	1.56847	-0.0397528	0.000109172	0.00277092	UP	no	NO
AT5G07820	0.68318	3.57911	0.000109899	0.00278728	UP	no	NO
AT4G23750	0.737457	3.55431	0.00011018	0.0027923	UP	no	NO
AT4G01130	0.555839	3.88052	0.000111582	0.00282572	UP	no	NO
AT2G46340	-0.375095	7.24676	0.000111932	0.00283243	DOWN	no	NO
AT1G63640	0.409574	5.04064	0.000113365	0.00286655	UP	no	NO
AT4G37540	0.499976	5.76261	0.000113944	0.00287902	UP	no	NO
AT2G18660	-3.97223	-0.346552	0.000114918	0.00290147	DOWN	no	NO
AT4G16141	0.510628	4.29514	0.000115535	0.0029135	UP	no	YES	4:9131692:G-GA;exonic_variant,4:9131624:T-TA;exonic_variant
AT5G28145	1.00251	0.424754	0.000115652	0.0029135	UP	no	NO
AT2G32930	0.641998	2.97219	0.000115654	0.0029135	UP	no	NO
AT5G16110	0.38151	7.54409	0.000117059	0.00294667	UP	no	NO
AT5G28335	1.39212	-0.757818	0.000117379	0.00295137	UP	no	YES	5:10311056:T-G;exonic_variant
AT1G05300	0.778078	3.28397	0.00011742	0.00295137	UP	no	NO
AT1G54100	0.497676	8.82384	0.000117737	0.00295711	UP	no	NO
AT2G41330	0.787207	2.13209	0.000117824	0.00295711	UP	no	NO
AT5G58600	0.759021	2.91232	0.000118237	0.00296526	UP	no	NO
AT1G03860	0.447803	5.79228	0.000118556	0.00297105	UP	no	NO
AT4G16447	-0.811212	1.39514	0.000119367	0.00298915	DOWN	no	NO
AT1G66390	-3.33328	-1.60109	0.000119804	0.00299786	DOWN	no	YES	1:24764419:CAT-C;intronic_variant
AT5G28020	-0.506329	5.7473	0.000119984	0.00300013	DOWN	no	NO
AT1G32928	0.931939	2.37139	0.000120178	0.00300275	UP	no	NO
AT5G20600	0.444896	4.29724	0.00012096	0.00302006	UP	no	NO
AT3G61620	0.512404	3.56595	0.00012186	0.00304027	UP	yes	NO
AT5G08430	-0.383277	5.04958	0.000122218	0.00304696	DOWN	no	NO
AT4G09570	0.50578	4.46273	0.00012236	0.00304823	UP	no	NO
AT1G32560	1.0876	1.47133	0.000122616	0.00305093	UP	no	NO
AT2G30770	-7.50788	0.089269	0.000122649	0.00305093	DOWN	no	NO
AT3G11650	0.651499	2.72379	0.000122803	0.00305241	UP	no	NO
AT1G31970	0.435928	5.77943	0.00012289	0.00305241	UP	no	NO
AT3G13210	-1.24216	-0.188407	0.000123442	0.00306385	DOWN	yes	NO
AT5G04275	-1.95433	-1.75056	0.000124462	0.00308689	DOWN	no	NO
AT3G60400	-0.596752	2.7949	0.00012523	0.00310365	DOWN	no	NO
AT5G08790	0.735568	5.07961	0.000125412	0.00310587	UP	no	NO
AT3G03790	-0.414893	5.94264	0.000126587	0.00313267	DOWN	no	NO
AT4G19390	0.674191	3.48547	0.000127111	0.00314334	UP	no	NO
AT1G14330	0.598864	3.91257	0.000127433	0.003149	UP	no	NO
AT1G56120	0.83027	2.0117	0.000127897	0.00315813	UP	no	NO
AT2G26350	0.404602	4.29393	0.000128258	0.00316474	UP	no	NO
AT5G05850	0.621327	2.79726	0.000128854	0.00317712	UP	no	NO
AT4G19530	0.422389	5.95815	0.000129756	0.003197	UP	no	NO
AT4G02540	0.651301	5.62288	0.000130235	0.00320464	UP	no	NO
AT3G03370	-0.877953	1.26476	0.000130256	0.00320464	DOWN	no	NO
AT3G47990	0.381148	5.32678	0.000131609	0.00323556	UP	no	NO
AT2G22300	0.488361	5.99419	0.000133184	0.00327189	UP	no	NO
AT5G06865	0.734999	4.02142	0.000133666	0.00327969	UP	no	NO
AT1G67840	-0.406114	6.25571	0.000133696	0.00327969	DOWN	no	NO
AT2G32880	0.419022	6.63436	0.000134026	0.0032854	UP	no	NO
AT4G34760	0.558018	4.58084	0.000134531	0.00329538	UP	no	NO
AT5G24060	0.40522	5.23027	0.000135425	0.00331485	UP	no	NO
AT4G27595	-0.593831	3.55824	0.000136107	0.00332914	DOWN	no	NO
AT2G47800	-0.510989	3.84108	0.0001363	0.00333143	DOWN	no	NO
AT2G20724	0.536605	3.61663	0.000136416	0.00333186	UP	no	NO
AT3G29810	-0.852617	2.15578	0.000136717	0.00333678	DOWN	no	NO
AT5G20410	-1.42152	2.91605	0.000136845	0.0033375	DOWN	no	NO
AT4G13640	0.401529	5.258	0.000137352	0.00334744	UP	no	NO
AT2G32320	0.435492	5.03961	0.000138075	0.00336262	UP	no	NO
AT4G12750	0.544905	3.61102	0.000138713	0.00337572	UP	no	NO
AT5G42400	-0.42862	4.75029	0.000139319	0.00338802	DOWN	no	NO
AT5G17930	0.40453	4.4425	0.000139667	0.00339402	UP	no	NO
AT3G62660	0.441221	5.14997	0.000140273	0.0034063	UP	no	NO
AT3G43800	-0.612012	4.906	0.000140773	0.00341598	DOWN	no	NO
AT3G22968	-0.514121	6.44491	0.000141644	0.00343465	DOWN	no	NO
AT4G02040	-1.08526	0.300543	0.00014246	0.0034513	DOWN	no	NO
AT4G12790	0.391218	5.56204	0.000142577	0.0034513	UP	no	NO
AT4G27260	0.685888	6.40269	0.000142639	0.0034513	UP	no	NO
AT5G19450	0.373966	5.81079	0.000145107	0.00350851	UP	no	NO
AT1G42440	0.391525	5.11317	0.000146909	0.00354952	UP	no	NO
AT4G24040	0.667886	4.02621	0.000147699	0.00356542	UP	no	NO
AT3G48330	0.409462	4.85941	0.000147779	0.00356542	UP	no	NO
AT2G01930	0.382583	5.5037	0.000148158	0.00357202	UP	no	NO
AT2G31670	-0.384254	5.51805	0.000150137	0.00361713	DOWN	no	NO
AT1G77460	-0.70325	3.46752	0.000150899	0.0036329	DOWN	no	NO
AT3G17465	0.470697	4.59387	0.000151404	0.00364247	UP	no	NO
AT1G73490	0.364765	5.53347	0.000151599	0.00364455	UP	no	YES	1:27634669:CA-C;intronic_variant
AT1G30360	0.372611	7.9743	0.000151711	0.00364464	UP	no	NO
AT2G46220	0.375382	8.25319	0.000151917	0.00364698	UP	no	NO
AT5G27520	0.743708	4.63786	0.000152226	0.00365134	UP	no	NO
AT5G65687	0.496607	3.93008	0.00015232	0.00365134	UP	no	NO
AT1G05020	1.09136	1.63671	0.000152484	0.00365134	UP	no	NO
AT4G02370	0.465762	5.18405	0.000152591	0.00365134	UP	no	NO
AT2G24220	-0.642345	2.39763	0.000152641	0.00365134	DOWN	no	NO
AT1G27480	-0.548841	5.26161	0.000152791	0.00365234	DOWN	no	NO
AT1G08520	0.352919	8.23854	0.000153098	0.00365708	UP	no	NO
AT1G19640	-1.93691	-1.54755	0.000155209	0.00370489	DOWN	no	NO
AT2G14680	0.409941	5.10053	0.000155399	0.00370679	UP	no	NO
AT1G21600	0.374932	6.48931	0.000156532	0.00372983	UP	no	NO
AT1G24140	1.53162	0.111141	0.000156586	0.00372983	UP	no	YES	1:8536383:C-T;protein_coding;sense;TCG>TCA;S>S
AT5G46830	-1.81936	0.195356	0.000156803	0.00373235	DOWN	no	NO
AT1G16410	-1.56199	5.52525	0.000156964	0.00373354	DOWN	no	NO
AT1G08810	-0.583333	3.64198	0.000158275	0.00376208	DOWN	no	NO
AT4G38460	-0.398453	5.62797	0.000158635	0.00376683	DOWN	no	NO
AT2G02710	0.527838	7.30262	0.000158699	0.00376683	UP	no	NO
AT1G70230	-0.488012	4.61153	0.000158962	0.00377042	DOWN	no	NO
AT5G61330	0.387263	5.67373	0.000160031	0.00379206	UP	no	NO
AT1G69610	-0.644649	3.56105	0.000160099	0.00379206	DOWN	no	NO
AT4G40065	0.830358	2.02702	0.000161668	0.00382651	UP	no	YES	4:18575388:C-T;exonic_variant
AT1G08840	0.658424	3.0919	0.000162339	0.00383969	UP	no	NO
AT3G57680	-0.75716	2.65896	0.000162993	0.00385155	DOWN	no	NO
AT4G38960	-0.658768	3.75116	0.000163069	0.00385155	DOWN	no	NO
AT1G03850	0.897922	2.43253	0.000163389	0.00385401	UP	no	NO
AT1G62560	-1.12142	3.55723	0.000163401	0.00385401	DOWN	no	NO
AT3G13065	-0.685854	4.46799	0.000163908	0.00386325	DOWN	no	NO
AT3G11010	-0.868505	2.19413	0.000164797	0.0038815	DOWN	no	NO
AT3G13600	1.30749	0.202097	0.00016722	0.0039358	UP	no	NO
AT5G17860	-0.613969	5.24913	0.000167618	0.00394241	DOWN	no	YES	5:5904429:G-GT;exonic_variant
AT2G23672	-0.559535	4.17385	0.000168326	0.0039563	DOWN	no	NO
AT1G10450	0.428455	5.07888	0.000168996	0.00396889	UP	no	NO
AT3G47680	-0.406491	4.9024	0.000169097	0.00396889	DOWN	no	NO
AT3G02560	0.389859	6.80981	0.000169253	0.00396978	UP	no	NO
AT5G02680	-0.655571	2.40642	0.000170671	0.00400026	DOWN	no	NO
AT5G06870	1.03189	5.79368	0.000170995	0.00400507	UP	no	NO
AT5G62140	-0.569022	4.75688	0.000171531	0.00401483	DOWN	no	NO
AT5G57050	0.581402	6.20472	0.000172088	0.00402508	UP	no	NO
AT4G06534	0.934287	2.99606	0.000172237	0.00402575	UP	no	NO
AT1G31310	1.0021	1.69926	0.000172862	0.00403756	UP	no	NO
AT3G19930	0.524887	5.71959	0.000173028	0.00403865	UP	no	NO
AT1G23130	-0.653826	9.05768	0.000175034	0.00408262	DOWN	no	NO
AT4G25410	-1.08631	-0.141011	0.000176782	0.00412054	DOWN	no	NO
AT1G21680	0.453246	7.40436	0.000176962	0.00412106	UP	no	NO
AT5G22390	1.02746	3.61785	0.000177095	0.00412106	UP	no	NO
AT3G54530	5.37271	-1.81939	0.000177171	0.00412106	UP	no	NO
AT1G62860	0.581454	2.80793	0.000178046	0.00413855	UP	no	NO
AT5G02100	0.573188	4.04184	0.000178452	0.00414512	UP	no	NO
AT5G62020	0.63778	4.71419	0.000178946	0.00415374	UP	no	NO
AT1G78370	-0.775357	6.84723	0.000180648	0.00419037	DOWN	no	NO
AT1G79360	0.870523	2.55882	0.00018089	0.00419309	UP	no	NO
AT5G58200	-0.377633	5.93304	0.000181029	0.00419341	DOWN	no	NO
AT5G01790	-1.01471	2.53425	0.000182254	0.00421889	DOWN	no	NO
AT2G18440	0.366865	8.25227	0.000183526	0.00424543	UP	no	NO
AT5G65710	-0.727995	2.4032	0.000183854	0.0042501	DOWN	no	NO
AT4G18490	0.693251	2.1536	0.000184817	0.00426942	UP	no	NO
AT1G48570	0.674321	3.8145	0.000186623	0.00430819	UP	no	NO
AT2G20850	0.39593	4.9538	0.000187736	0.00433091	UP	no	NO
AT5G54390	-0.512035	6.13653	0.000187995	0.00433393	DOWN	no	NO
AT3G44750	0.603464	4.60439	0.000188147	0.00433447	UP	no	NO
AT5G50670	0.850144	4.57346	0.000188569	0.00434122	UP	no	NO
AT5G24030	0.815327	5.07787	0.000189268	0.00435434	UP	no	NO
AT1G75190	0.561231	3.81369	0.000190814	0.00438691	UP	no	NO
AT2G42160	0.407184	4.75955	0.000191333	0.00439583	UP	no	NO
AT5G20170	0.389196	4.43827	0.000192712	0.0044245	UP	no	NO
AT1G74430	-0.536996	3.43054	0.000193667	0.00444339	DOWN	no	NO
AT1G21050	-0.519264	3.98294	0.000194018	0.00444842	DOWN	no	NO
AT1G79950	0.407767	4.55368	0.000195061	0.0044693	UP	no	NO
AT4G21430	0.425859	4.21488	0.000195427	0.00447462	UP	no	NO
AT2G34960	-1.57741	-0.362193	0.000195883	0.00448203	DOWN	no	NO
AT1G62280	-2.23322	-0.9232	0.000196303	0.00448858	DOWN	no	NO
AT5G08520	0.379015	5.93099	0.000196805	0.00449701	UP	no	NO
AT1G12730	0.536807	3.18239	0.000197673	0.00451203	UP	no	NO
AT3G21270	0.581837	4.14248	0.00019773	0.00451203	UP	no	NO
AT5G20700	-0.631807	8.39195	0.000198462	0.00452565	DOWN	no	NO
AT3G46610	-0.405795	4.77187	0.00019917	0.00453874	DOWN	no	NO
AT1G80810	0.430794	4.15835	0.000199852	0.0045512	UP	no	NO
AT1G29510	0.751914	3.63393	0.000200172	0.00455539	UP	no	NO
AT1G58602	-0.554901	5.92677	0.00020078	0.00456615	DOWN	no	YES	1:21752770:A-AC;exonic_variant,1:21763990:T-A;intronic_variant,1:21765160:G-A;protein_coding;sense;GGG>GGA;G>G,1:21765160:G-A;exonic_variant,1:21752770:A-AC;intronic_variant
AT1G32640	0.857213	6.14259	0.00020113	0.00457103	UP	no	NO
AT2G43700	-0.733415	2.31746	0.00020178	0.00458271	DOWN	no	NO
AT1G25682	-0.404891	4.23882	0.000203369	0.00461568	DOWN	yes	YES	1:9002886:C-T;splice_acceptor_variant,1:9004454:C-T;intronic_variant,1:9002886:C-T;splice_acceptor_region_variant
AT2G22450	0.595239	4.21297	0.000205331	0.00465708	UP	no	NO
AT1G74910	0.396013	7.46128	0.000206071	0.00466767	UP	no	NO
AT3G26910	0.618263	4.23727	0.000206075	0.00466767	UP	no	NO
AT1G10095	0.582407	2.93631	0.000206447	0.00467295	UP	no	NO
AT1G15200	0.362517	6.20916	0.000208062	0.00470634	UP	no	NO
AT4G32300	0.421356	5.02802	0.000208746	0.00471865	UP	no	NO
AT2G39810	0.352184	5.38071	0.000210978	0.00476589	UP	no	NO
AT1G18060	-0.382492	6.22688	0.000213078	0.00481012	DOWN	no	NO
AT5G62280	0.560862	7.08024	0.000214552	0.00484014	UP	no	NO
AT4G18120	-0.466693	6.89359	0.000215654	0.00486174	DOWN	no	YES	4:10039709:GC-G;exonic_variant,4:10041851:G-C;intronic_variant,4:10039794:TC-T;intronic_variant,4:10041853:C-A;splice_acceptor_region_variant,4:10039799:GT-G;intronic_variant,4:10039709:GC-G;exonic_variant&protein_coding,4:10039709:GC-G;splice_donor_variant
AT5G63010	0.648775	2.3722	0.000217706	0.00490471	UP	no	NO
AT3G59290	0.43553	4.82088	0.000218751	0.00492497	UP	no	NO
AT2G01730	0.956746	0.835757	0.000219231	0.00493248	UP	no	NO
AT5G25190	1.23104	6.07412	0.000220925	0.00496728	UP	no	NO
AT4G18905	0.418109	4.79197	0.000221146	0.00496892	UP	no	NO
AT3G10116	2.26678	-2.0485	0.000221513	0.00497385	UP	no	NO
AT1G28570	-0.600489	3.16506	0.000221808	0.00497539	DOWN	no	NO
AT3G10700	0.42887	4.12037	0.000221877	0.00497539	UP	no	NO
AT1G53700	-1.09319	0.920427	0.000222871	0.00499436	DOWN	no	NO
AT2G21660	0.832191	7.59093	0.000223652	0.00500854	UP	yes	NO
AT2G30360	0.660166	4.35905	0.000226507	0.00506909	UP	no	NO
AT3G20100	-0.577384	5.42515	0.000226984	0.00507638	DOWN	no	NO
AT5G61140	0.388772	6.45835	0.000227175	0.0050773	UP	yes	NO
AT5G06290	-0.327854	7.51254	0.000227613	0.0050837	DOWN	no	NO
AT2G34490	-0.787163	4.37212	0.000227944	0.00508773	DOWN	no	NO
AT1G24148	-0.481915	5.09021	0.000228361	0.00509365	DOWN	no	NO
AT5G49360	0.716931	9.47261	0.00022875	0.00509897	UP	no	NO
AT5G67350	-0.599831	2.59095	0.000229347	0.00510811	DOWN	no	NO
AT2G35940	-0.380362	6.65347	0.000229464	0.00510811	DOWN	no	NO
AT1G07520	0.510911	3.52804	0.000231162	0.00514251	UP	no	NO
AT2G11810	-3.22032	2.05721	0.000231431	0.0051451	DOWN	no	NO
AT5G62710	0.519351	3.5882	0.000231614	0.00514577	UP	no	NO
AT4G36940	0.41835	4.43577	0.000232977	0.00517263	UP	no	NO
AT1G52560	1.32134	-0.34848	0.000234873	0.0052113	UP	no	NO
AT3G04820	0.477789	3.8512	0.000235329	0.00521799	UP	no	NO
AT5G37475	0.386852	4.98379	0.000236287	0.00523355	UP	no	NO
AT4G23430	-0.442465	5.42288	0.000236342	0.00523355	DOWN	no	NO
AT1G80610	0.573147	3.62254	0.000237427	0.00525413	UP	no	NO
AT2G25510	-0.784652	5.02011	0.000239537	0.00529733	DOWN	no	YES	2:10856843:C-T;protein_coding;missense;CCG>TCG;P>S
AT2G42670	0.43109	3.99267	0.000239991	0.00530389	UP	no	NO
AT1G27470	0.478723	4.05625	0.000240636	0.00531466	UP	no	NO
AT5G54730	0.434447	5.09324	0.000240979	0.00531875	UP	no	NO
AT1G21400	0.56606	8.06192	0.000242942	0.00535857	UP	no	NO
AT2G43630	0.356522	5.46793	0.000243519	0.00536778	UP	no	NO
AT3G21560	-0.631842	4.25794	0.000244065	0.00537628	DOWN	no	NO
AT1G09310	-0.575477	9.49664	0.000244451	0.00538127	DOWN	no	NO
AT4G01120	0.62561	4.86646	0.000244896	0.00538755	UP	no	NO
AT4G08150	0.831782	3.77564	0.000245657	0.00540038	UP	no	NO
AT3G18290	0.762974	6.55376	0.0002458	0.00540038	UP	no	NO
AT4G01580	0.682928	2.65622	0.000248208	0.00544973	UP	no	NO
AT4G36080	-0.387579	5.32125	0.00024875	0.00545807	DOWN	no	NO
AT5G40890	0.337947	8.32378	0.000249064	0.00545891	UP	no	NO
AT5G64572	-0.83838	1.19171	0.000249112	0.00545891	DOWN	no	NO
AT2G45180	0.38316	9.27836	0.000250873	0.00549166	UP	no	NO
AT2G45730	0.385832	4.54861	0.000250933	0.00549166	UP	no	NO
AT2G01390	0.752257	1.67107	0.000251154	0.00549293	UP	no	NO
AT1G05562	-0.61187	3.81896	0.000251483	0.00549655	DOWN	no	NO
AT4G37980	-0.622075	6.7489	0.000252305	0.0055071	DOWN	no	YES	4:17854589:C-T;exonic_variant
AT5G06790	-1.13895	2.03345	0.000252398	0.0055071	DOWN	no	NO
AT5G46910	0.570642	3.08245	0.000252456	0.0055071	UP	no	NO
AT2G40316	0.42861	4.6808	0.000255681	0.00557385	UP	no	NO
AT5G51720	-1.09153	6.13832	0.000255989	0.00557696	DOWN	no	NO
AT3G01060	-0.547281	6.52543	0.000256542	0.00558538	DOWN	no	NO
AT5G13100	0.398532	5.6641	0.000257014	0.00559204	UP	no	NO
AT2G21320	-0.862727	4.48718	0.000259	0.00563161	DOWN	no	NO
AT4G34135	-1.20115	3.20947	0.000259301	0.00563452	DOWN	no	NO
AT2G29680	0.903321	2.26878	0.000260064	0.00564747	UP	no	NO
AT4G31210	0.524838	4.66202	0.00026073	0.00565828	UP	no	NO
AT5G37350	0.378071	4.92248	0.000262534	0.00569375	UP	no	NO
AT3G48610	-0.417711	5.79099	0.000263222	0.00570501	DOWN	no	NO
AT1G14020	0.429907	4.1949	0.000263513	0.00570765	UP	no	NO
AT4G16630	0.518355	3.98421	0.000264262	0.00571814	UP	no	NO
AT4G37770	1.64704	-0.310848	0.000264338	0.00571814	UP	no	NO
AT2G46970	-1.75718	-1.34173	0.000266314	0.00575568	DOWN	no	NO
AT1G74200	-1.06645	0.51166	0.000266415	0.00575568	DOWN	no	NO
AT3G21090	0.57008	5.12228	0.000267105	0.0057669	UP	no	NO
AT3G59660	-0.43286	4.87267	0.000270053	0.00582682	DOWN	no	NO
AT4G29905	0.719031	8.2881	0.000270296	0.00582831	UP	no	NO
AT1G17260	0.6884	1.78102	0.000270867	0.00583689	UP	no	YES	1:5906995:C-CA;splice_donor_region_variant
AT2G01300	1.32806	0.80552	0.000273582	0.00589045	UP	no	NO
AT1G28310	-0.518937	3.24443	0.000273702	0.00589045	DOWN	no	NO
AT3G09650	-0.425241	4.7379	0.00027571	0.00592989	DOWN	no	NO
AT5G17340	-6.20039	-1.51067	0.000275993	0.00593218	DOWN	no	NO
AT3G52740	-0.84794	3.21667	0.000276835	0.00594648	DOWN	no	NO
AT4G28180	0.681748	2.27706	0.000279446	0.00599873	UP	no	NO
AT4G37320	-0.4651	3.69544	0.000279898	0.0060012	DOWN	no	NO
AT5G02410	-0.62434	2.91452	0.000279917	0.0060012	DOWN	no	NO
AT5G44310	2.23751	-2.62452	0.000280856	0.0060175	UP	no	YES	5:17848373:A-ATAAGCTTTATCCTTGGCCTTCTCTTTTGTCTCG;exonic_variant&protein_coding
AT2G25735	1.42763	0.885869	0.000281177	0.00602054	UP	no	NO
AT3G21040	-2.204	-2.6111	0.000281782	0.00602589	DOWN	no	NO
AT3G63150	0.357505	5.37845	0.000281784	0.00602589	UP	no	NO
AT3G61898	-0.862246	0.848612	0.000284446	0.00607745	DOWN	no	NO
AT5G18600	0.548571	5.97052	0.000284556	0.00607745	UP	no	NO
AT5G14200	-1.08932	6.00217	0.000285043	0.00608398	DOWN	no	NO
AT2G23910	1.63473	-1.2091	0.000285473	0.00608932	UP	no	NO
AT4G29070	-0.40546	5.83881	0.000289337	0.00616782	DOWN	no	NO
AT4G11300	0.579742	3.61453	0.00029092	0.0061944	UP	no	NO
AT1G75800	0.473154	6.87971	0.000290951	0.0061944	UP	no	NO
AT1G80130	-0.791913	6.25612	0.000291315	0.00619771	DOWN	no	NO
AT1G59700	-0.386888	5.57719	0.000291475	0.00619771	DOWN	no	NO
AT3G20475	0.891438	1.3228	0.000291949	0.00620184	UP	no	NO
AT3G48420	-0.37073	6.83929	0.000292037	0.00620184	DOWN	no	NO
AT5G66052	0.632201	5.05936	0.000292358	0.00620474	UP	no	NO
AT1G62540	-0.789172	4.53686	0.000294208	0.00623769	DOWN	no	NO
AT2G22400	0.357211	5.49343	0.000294281	0.00623769	UP	no	NO
AT2G43430	0.414377	4.70819	0.000296529	0.00628138	UP	no	NO
AT3G15010	0.37197	6.00207	0.000298163	0.00631202	UP	no	NO
AT5G14420	0.41259	5.28607	0.000298617	0.0063169	UP	no	NO
AT3G16830	0.372824	6.53853	0.000298768	0.0063169	UP	no	NO
AT1G73710	-0.39451	4.44867	0.000300144	0.00634199	DOWN	no	NO
AT5G02010	0.513955	3.86131	0.000302465	0.00638704	UP	no	NO
AT3G59830	1.78806	-1.54781	0.000302977	0.00639383	UP	no	NO
AT5G67440	0.37958	4.56967	0.000303174	0.006394	UP	no	NO
AT5G52900	0.625227	6.11925	0.000306488	0.00645985	UP	no	NO
AT4G23600	-0.577932	4.62577	0.00031023	0.00653462	DOWN	no	NO
AT2G29360	-0.418581	6.37042	0.000310738	0.00654123	DOWN	no	NO
AT3G05327	-1.03601	0.185712	0.000312757	0.00657962	DOWN	no	NO
AT3G08660	-1.09523	1.1594	0.00031578	0.00663907	DOWN	no	NO
AT2G26910	-0.354405	6.92209	0.000317646	0.00667413	DOWN	no	NO
AT4G26450	-0.360088	5.75845	0.000318813	0.00669447	DOWN	no	NO
AT5G67140	-0.547075	3.41792	0.0003191	0.00669632	DOWN	no	NO
AT1G49010	-0.469926	5.28647	0.000319586	0.00669842	DOWN	no	NO
AT3G17580	-1.23203	0.661405	0.000319597	0.00669842	DOWN	no	NO
AT3G08870	-0.800927	2.08816	0.000321847	0.00674138	DOWN	no	NO
AT4G15710	1.2642	1.6625	0.00032304	0.00676215	UP	no	NO
AT2G38110	-0.699629	3.03231	0.000323909	0.00677614	DOWN	no	NO
AT5G23575	0.474089	5.64775	0.000324179	0.00677757	UP	no	NO
AT5G04540	0.383032	5.25911	0.000325086	0.00679232	UP	no	NO
AT1G65970	0.88782	4.32691	0.00032669	0.00682159	UP	no	NO
AT4G03205	-0.483776	4.27065	0.000328399	0.00685304	DOWN	no	NO
AT4G35240	0.431286	4.35858	0.000329177	0.00686502	UP	no	NO
AT5G06060	-0.341154	5.69023	0.000330139	0.00688083	DOWN	no	NO
AT1G05560	-0.821066	5.02626	0.000330557	0.0068825	DOWN	no	NO
AT5G38980	-0.543037	6.62348	0.000330628	0.0068825	DOWN	no	NO
AT5G02590	-0.699291	2.46274	0.000331487	0.00689612	DOWN	no	NO
AT5G25510	-0.376738	5.02866	0.000332222	0.00690713	DOWN	no	NO
AT1G72760	4.25074	-1.23705	0.000334113	0.00694162	UP	no	NO
AT2G14260	0.339253	6.88241	0.000334293	0.00694162	UP	no	NO
AT1G56130	0.744819	2.29352	0.000335104	0.00695419	UP	no	NO
AT1G61600	-0.818175	1.84188	0.000336277	0.00697423	DOWN	no	NO
AT5G04530	0.546063	5.75759	0.000336489	0.00697434	UP	no	NO
AT5G26180	0.457265	3.80306	0.000336772	0.00697591	UP	no	NO
AT3G59930	1.19053	2.38276	0.000338272	0.00700266	UP	no	NO
AT1G52890	0.644378	5.698	0.000339511	0.007024	UP	no	NO
AT4G34550	-1.66958	0.56438	0.00034174	0.00706577	DOWN	no	NO
AT5G29040	-1.67102	-1.18876	0.000344693	0.00712245	DOWN	no	NO
AT2G25000	-0.82024	2.03252	0.000345596	0.00713675	DOWN	no	NO
AT5G17150	-2.04969	-1.92635	0.000346158	0.00714276	DOWN	no	NO
AT1G05330	1.66617	-1.18596	0.000346312	0.00714276	UP	no	NO
AT5G48120	0.367008	5.00133	0.000347006	0.0071527	UP	no	NO
AT3G60670	0.678227	1.86288	0.000348656	0.00718231	UP	no	NO
AT1G28210	0.75387	1.97236	0.000350374	0.00721329	UP	no	NO
AT1G79440	0.522001	4.64971	0.000350856	0.0072188	UP	no	NO
AT4G16880	-0.542978	5.2721	0.00035201	0.00723726	DOWN	no	NO
AT3G20780	0.432966	3.72529	0.000352545	0.00723726	UP	no	NO
AT1G48410	0.364577	7.64642	0.000352595	0.00723726	UP	no	YES	1:17886752:G-A;exonic_variant,1:17886752:G-A;protein_coding;missense;ACC>ATC;T>I
AT1G54170	0.373391	5.28448	0.000352612	0.00723726	UP	no	NO
AT3G04600	0.388452	4.98046	0.000353206	0.00724317	UP	no	NO
AT5G57210	-0.46502	3.53239	0.000353331	0.00724317	DOWN	no	NO
AT1G36732	-0.60714	5.3599	0.000354354	0.00725974	DOWN	no	NO
AT5G25280	0.375155	8.36112	0.00035552	0.00727919	UP	no	NO
AT5G06620	0.75021	2.08252	0.000356498	0.00729479	UP	no	NO
AT3G54720	0.547981	5.2328	0.000356924	0.00729907	UP	no	NO
AT3G03530	-2.16576	1.49903	0.000357322	0.00730277	DOWN	no	NO
AT3G45740	0.419057	3.98049	0.000357762	0.00730733	UP	no	NO
AT1G67600	-0.677281	2.01323	0.000359055	0.0073293	DOWN	no	NO
AT1G07010	-0.534175	6.691	0.000362841	0.00740208	DOWN	no	NO
AT1G49600	0.407946	6.07521	0.000364407	0.00742953	UP	no	NO
AT3G29575	0.574105	5.7574	0.000366193	0.0074578	UP	no	NO
AT3G21010	-0.77929	1.17374	0.000366236	0.0074578	DOWN	no	NO
AT1G68370	0.338508	5.42713	0.000366655	0.00745787	UP	no	NO
AT5G60890	-0.733601	5.06395	0.000366682	0.00745787	DOWN	no	NO
AT1G70210	0.580422	4.94809	0.000367165	0.00746318	UP	no	NO
AT5G11550	-0.534902	4.07484	0.000367881	0.00747322	DOWN	no	NO
AT3G60360	0.551919	3.53256	0.000369843	0.00750648	UP	no	NO
AT1G02990	-0.398678	4.87669	0.000369964	0.00750648	DOWN	no	NO
AT1G36060	1.03331	4.70341	0.000371383	0.00753021	UP	no	NO
AT5G22370	0.40893	3.99403	0.000371581	0.00753021	UP	no	NO
AT1G60640	0.514436	3.62561	0.000371926	0.00753267	UP	no	NO
AT5G28050	0.384596	6.14811	0.000374385	0.00757791	UP	no	NO
AT3G16740	0.494647	4.28775	0.000376166	0.00760941	UP	no	NO
AT4G31050	-0.597967	2.9902	0.000376612	0.00761384	DOWN	no	NO
AT4G36250	-0.444308	6.6148	0.000378377	0.00764495	DOWN	no	NO
AT5G48570	0.858511	3.80104	0.000378916	0.00765124	UP	no	NO
AT4G03190	0.495597	4.98709	0.00037935	0.00765541	UP	no	NO
AT4G14720	0.430251	4.45217	0.000381145	0.00768331	UP	no	NO
AT3G46210	0.517563	3.68861	0.000381189	0.00768331	UP	yes	NO
AT2G36880	-0.482321	7.10337	0.000384177	0.00773892	DOWN	no	NO
AT5G04040	0.406149	6.19401	0.000384644	0.00774368	UP	no	NO
AT2G47750	-0.584982	3.406	0.000385099	0.00774822	DOWN	no	NO
AT2G45130	-3.42345	1.60308	0.000389327	0.00782518	DOWN	no	NO
AT5G20420	-0.734402	1.72769	0.000389389	0.00782518	DOWN	no	NO
AT5G65920	0.719859	3.13774	0.00039185	0.00786626	UP	no	NO
AT5G01220	-0.728154	6.47826	0.000392056	0.00786626	DOWN	no	NO
AT1G74180	-0.570865	3.36072	0.000392133	0.00786626	DOWN	no	NO
AT3G15120	-0.367152	4.84973	0.000392607	0.00787106	DOWN	no	NO
AT1G02670	0.866453	1.39202	0.000393349	0.00788125	UP	no	NO
AT3G57157	-2.09869	0.0033587	0.000395199	0.00791362	DOWN	no	NO
AT3G21030	-1.33212	-0.573595	0.000396326	0.00793147	DOWN	no	NO
AT5G67280	-0.574176	4.25969	0.000397088	0.00794199	DOWN	no	NO
AT3G07370	0.365893	4.51774	0.000400593	0.00800734	UP	no	NO
AT4G30470	0.531815	5.20889	0.0004034	0.00805867	UP	no	NO
AT3G10230	-0.340511	6.55577	0.000403913	0.00806414	DOWN	no	NO
AT1G68410	0.417278	4.44497	0.000404468	0.00807042	UP	no	NO
AT5G44390	-0.831965	2.01623	0.000405509	0.00808641	DOWN	no	NO
AT1G31500	0.402791	4.19399	0.000406602	0.0081034	UP	no	NO
AT1G55850	-0.587579	5.39296	0.000407062	0.00810779	DOWN	no	NO
AT3G50770	1.91016	1.1017	0.00040889	0.00813937	UP	no	NO
AT4G37180	0.379355	6.64753	0.000411093	0.00817451	UP	no	NO
AT4G03410	-0.449917	4.41077	0.000411141	0.00817451	DOWN	no	NO
AT5G66880	0.412364	6.00011	0.000411389	0.00817463	UP	no	NO
AT3G11910	0.327285	6.96879	0.000412272	0.00818734	UP	no	NO
AT1G15260	-0.53267	4.73724	0.000414871	0.00823411	DOWN	no	NO
AT4G10600	-0.816472	0.792724	0.000419831	0.00832585	DOWN	no	NO
AT3G21530	-0.584072	2.81713	0.000419988	0.00832585	DOWN	no	NO
AT5G03320	0.413866	4.58453	0.00042038	0.00832872	UP	no	NO
AT5G34790	-1.13074	-0.0289374	0.000421384	0.0083437	DOWN	no	NO
AT3G16690	0.632133	3.80632	0.000423222	0.00837516	UP	no	NO
AT5G50320	0.347305	4.88643	0.000424763	0.00840074	UP	no	NO
AT1G75290	-1.24273	-0.61634	0.000427709	0.00845403	DOWN	no	NO
AT5G20710	1.37404	2.36896	0.000429246	0.00847943	UP	no	NO
AT4G00300	0.516464	4.41247	0.000429695	0.0084795	UP	no	NO
AT5G26160	-0.504843	3.78857	0.000429753	0.0084795	DOWN	no	NO
AT1G14910	0.373991	5.52744	0.000431281	0.00850467	UP	no	NO
AT2G18670	0.495537	3.93295	0.000431966	0.00851262	UP	no	NO
AT1G33811	-0.621748	5.76422	0.000432338	0.00851262	DOWN	no	YES	1:12268698:A-AT;intronic_variant
AT4G03440	-0.621814	1.98267	0.000432442	0.00851262	DOWN	no	NO
AT5G63420	0.407045	5.08613	0.000434103	0.00854032	UP	no	NO
AT5G59450	0.401877	4.43343	0.000434618	0.00854546	UP	no	NO
AT4G00550	-0.417317	4.00463	0.00043582	0.00856409	DOWN	no	NO
AT3G23550	-2.26465	-0.222332	0.000437107	0.00858379	DOWN	no	NO
AT4G00050	-0.457994	5.34055	0.000437332	0.00858379	DOWN	no	NO
AT4G03060	-1.65355	2.51122	0.000437605	0.00858414	DOWN	no	NO
AT1G10640	-0.535997	5.43639	0.000439885	0.00862385	DOWN	no	NO
AT3G17790	-1.00406	5.89622	0.000441852	0.00865737	DOWN	no	NO
AT5G20790	-2.71068	3.34004	0.000450751	0.00882659	DOWN	no	NO
AT3G50270	-0.573725	4.31237	0.000456582	0.00893558	DOWN	no	NO
AT5G50340	0.401948	4.90389	0.000457733	0.0089529	UP	no	NO
AT3G44330	0.350212	5.93194	0.000458344	0.00895965	UP	no	NO
AT4G12300	-0.392439	4.57965	0.000459059	0.00896842	DOWN	no	NO
AT1G62630	-0.507049	4.3212	0.000459543	0.00897268	DOWN	no	NO
AT4G37250	0.388366	4.75349	0.000461766	0.00901054	UP	no	NO
AT3G16290	-0.328758	6.29347	0.000462017	0.00901054	DOWN	no	NO
AT2G26170	-0.486588	4.41126	0.000464172	0.00904732	DOWN	no	NO
AT1G28130	0.499597	4.9034	0.000465757	0.00907297	UP	no	NO
AT5G62600	0.353492	4.89437	0.000466218	0.0090767	UP	no	NO
AT4G13850	0.468209	6.36314	0.000468012	0.00910636	UP	no	NO
AT4G38240	0.399144	5.54914	0.000469103	0.00912232	UP	no	NO
AT1G32780	-0.795241	2.66293	0.000470276	0.00913985	DOWN	no	YES	1:11870625:A-AT;intronic_variant
AT1G24793	-0.51687	4.41438	0.000472597	0.00917966	DOWN	no	NO
AT5G13280	0.340598	5.73163	0.000474104	0.00920363	UP	no	NO
AT5G63250	2.5346	-1.39723	0.000474816	0.00921214	UP	no	NO
AT3G23530	0.384658	6.03186	0.000477748	0.00926368	UP	no	NO
AT1G13750	-1.12544	3.03394	0.000478246	0.00926801	DOWN	no	NO
AT3G52400	0.765485	3.53548	0.0004788	0.00927341	UP	no	NO
AT1G17620	0.557937	4.73788	0.000481838	0.00932688	UP	no	NO
AT4G32600	-0.394366	5.27363	0.000485506	0.00939248	DOWN	no	NO
AT5G08230	-0.483949	4.4161	0.000486579	0.00940785	DOWN	no	NO
AT3G10760	-0.378646	5.29547	0.000490175	0.00947193	DOWN	no	NO
AT1G68020	0.352852	6.08371	0.000490953	0.00948154	UP	no	NO
AT2G40430	0.337094	5.59262	0.000491662	0.00948978	UP	no	NO
AT2G34750	0.328068	6.29592	0.000492316	0.00949695	UP	no	NO
AT2G32440	-0.400788	5.1627	0.000492869	0.00950219	DOWN	no	NO
AT4G25290	-0.437922	5.61996	0.000495401	0.00954357	DOWN	no	NO
AT4G13800	0.863689	4.64633	0.000495582	0.00954357	UP	no	NO
AT1G19050	0.937203	2.82976	0.000497187	0.00956901	UP	no	NO
AT2G30100	-0.393052	4.53826	0.000500062	0.00961884	DOWN	no	NO
AT5G60680	0.485067	7.29275	0.000501759	0.00964305	UP	no	NO
AT1G18590	-0.809485	4.4195	0.000501893	0.00964305	DOWN	no	NO
AT4G38440	0.440426	4.41446	0.000503515	0.00966748	UP	no	NO
AT2G25900	0.544135	7.70065	0.000503739	0.00966748	UP	no	NO
AT5G45030	-0.479282	3.62127	0.000504312	0.00967297	DOWN	no	NO
AT2G33510	0.5238	3.26428	0.000504699	0.00967489	UP	no	NO
AT2G05310	-0.410218	7.45759	0.000505383	0.00968248	DOWN	no	NO
AT2G33210	0.531937	4.76785	0.000506799	0.00970197	UP	no	NO
AT1G22660	0.418118	4.16265	0.000506976	0.00970197	UP	no	NO
AT4G20830	0.425437	5.65161	0.000509292	0.00974075	UP	no	NO
AT5G09570	-1.95849	0.939591	0.000510159	0.00975179	DOWN	no	NO
AT5G64200	0.325935	5.33815	0.000510568	0.00975409	UP	no	NO
AT5G65870	-0.712169	2.99845	0.000512916	0.00979338	DOWN	no	NO
AT4G30100	-0.324231	6.43485	0.000514029	0.00980907	DOWN	no	NO
AT1G35670	0.408501	5.09767	0.000517475	0.00986924	UP	no	NO
AT4G18650	1.75685	2.45468	0.000518091	0.00987133	UP	no	NO
AT4G39090	0.487089	9.57638	0.000518429	0.00987133	UP	no	NO
AT5G16590	0.417094	4.92172	0.000518464	0.00987133	UP	no	NO
AT5G50360	1.47836	2.21354	0.000520691	0.00990814	UP	no	NO
AT5G41580	0.391854	4.096	0.00052117	0.00991164	UP	no	NO
AT4G36670	1.0517	4.93706	0.000521791	0.00991341	UP	no	NO
AT5G27345	2.00847	-2.09419	0.000521851	0.00991341	UP	no	NO
AT3G02830	-0.367531	6.55878	0.000524407	0.00995635	DOWN	no	NO
AT2G30362	-1.19291	-0.714434	0.000527227	0.0100012	DOWN	no	NO
AT1G53080	1.53206	-0.917174	0.000527363	0.0100012	UP	no	NO
AT5G37380	0.393006	4.23724	0.000529294	0.010032	UP	no	NO
AT5G44260	0.525743	6.95693	0.000529848	0.010032	UP	no	NO
AT2G20810	-0.365547	4.52973	0.000529883	0.010032	DOWN	no	NO
AT3G59210	-0.38846	5.06538	0.00053308	0.0100869	DOWN	no	NO
AT1G73450	-0.401871	3.91966	0.000535679	0.0101275	DOWN	no	NO
AT1G33640	-2.50859	-2.65526	0.000535826	0.0101275	DOWN	no	NO
AT5G05100	0.329878	6.01059	0.000539911	0.010199	UP	no	NO
AT3G24750	-1.69574	1.88084	0.000543038	0.0102487	DOWN	no	NO
AT2G46640	-0.832138	4.2722	0.000543153	0.0102487	DOWN	no	YES	2:19149969:C-T;protein_coding;missense;ACT>ATT;T>I,2:19149969:C-T;exonic_variant
AT1G49032	0.415146	5.50738	0.000543739	0.010254	UP	no	NO
AT3G21310	-0.989316	-0.0419486	0.000545086	0.0102737	DOWN	no	NO
AT5G28262	-0.959855	0.305062	0.000547804	0.0103191	DOWN	no	NO
AT5G07460	-1.02372	3.89052	0.000548806	0.0103276	DOWN	no	NO
AT4G39480	-0.802888	1.88002	0.000548866	0.0103276	DOWN	no	NO
AT1G30835	-0.425	4.61871	0.000550354	0.0103498	DOWN	no	NO
AT4G02420	-0.641843	3.12453	0.0005515	0.0103655	DOWN	no	NO
AT1G05540	-1.33792	0.0381551	0.000552259	0.010374	DOWN	no	NO
AT5G17310	0.456983	6.42701	0.000554553	0.0104113	UP	no	YES	5:5696743:C-CA;exonic_variant
AT5G35170	-0.32514	8.28416	0.000555443	0.0104222	DOWN	no	NO
AT1G30730	1.20256	0.555688	0.000556901	0.0104395	UP	no	NO
AT1G20440	0.528015	8.45371	0.000556984	0.0104395	UP	no	NO
AT1G45191	-0.667035	2.84469	0.000557974	0.0104522	DOWN	no	NO
AT1G62200	-0.432542	4.46705	0.000558684	0.0104597	DOWN	no	NO
AT4G21100	0.366246	4.91919	0.000561614	0.0105068	UP	no	NO
AT5G60450	0.333768	5.42486	0.000561824	0.0105068	UP	no	NO
AT1G50290	-0.562399	3.93893	0.000563045	0.0105238	DOWN	no	NO
AT1G29170	-0.41592	4.336	0.000563624	0.0105288	DOWN	no	NO
AT5G01520	0.634407	5.91059	0.000567575	0.0105967	UP	no	NO
AT1G05575	1.01292	0.39907	0.000569972	0.0106356	UP	no	NO
AT4G13495	0.330088	8.77018	0.00057289	0.0106841	UP	no	NO
AT4G13493	0.584665	3.92528	0.000574268	0.0107039	UP	no	NO
AT3G11080	-0.857979	0.85253	0.000575019	0.010712	DOWN	no	NO
AT1G64970	-0.374785	4.84119	0.000580469	0.0108034	DOWN	no	NO
AT3G09010	-1.09668	0.0620634	0.000580569	0.0108034	DOWN	no	NO
AT5G40670	-0.398401	5.60017	0.000581455	0.0108139	DOWN	no	NO
AT4G33620	0.435016	3.66122	0.000582675	0.0108306	UP	no	NO
AT1G52343	0.916623	0.345782	0.000583272	0.0108357	UP	no	NO
AT2G42580	0.635683	5.35221	0.000585403	0.0108693	UP	no	NO
AT3G17440	0.34498	5.31792	0.000588015	0.0109118	UP	no	NO
AT3G22530	-0.407797	4.31488	0.00058981	0.0109391	DOWN	no	NO
AT2G39950	-0.347359	5.62473	0.000594015	0.011011	DOWN	no	NO
AT2G30280	0.423835	3.79774	0.000595757	0.0110372	UP	no	NO
AT4G03510	0.61654	5.60561	0.000597114	0.0110563	UP	no	NO
AT5G57250	-0.401812	3.87663	0.000599507	0.0110945	DOWN	no	NO
AT5G36120	-0.42499	4.55001	0.000602281	0.0111397	DOWN	no	NO
AT4G22790	-0.73805	1.68187	0.000604139	0.011168	DOWN	no	NO
AT1G49640	-1.68147	-0.408571	0.000607047	0.0112155	DOWN	no	NO
AT5G56550	0.899477	5.67895	0.000607575	0.0112192	UP	no	NO
AT1G55120	-0.973127	1.95176	0.000608798	0.0112356	DOWN	no	NO
AT3G48840	-5.51413	-3.41541	0.000610003	0.0112517	DOWN	no	NO
AT3G08670	-0.437258	4.95925	0.000614517	0.0113287	DOWN	no	NO
AT1G07890	-0.452838	8.80236	0.000619581	0.0114158	DOWN	no	NO
AT1G17250	-1.73692	-1.64139	0.000621521	0.0114453	DOWN	no	NO
AT4G19700	-0.388301	4.40342	0.000624	0.0114847	DOWN	no	NO
AT5G64250	-0.32059	5.60589	0.000625895	0.0115124	DOWN	no	NO
AT1G77870	-0.786903	1.65049	0.000626189	0.0115124	DOWN	no	NO
AT5G17640	0.477695	4.42248	0.000628363	0.011546	UP	no	NO
AT1G03130	-0.321526	9.89442	0.000629124	0.0115524	DOWN	no	NO
AT3G10410	0.37269	6.11928	0.000629549	0.0115524	UP	no	NO
AT5G11710	0.312044	6.66627	0.000629739	0.0115524	UP	no	NO
AT4G18010	0.735884	5.28828	0.00063023	0.0115551	UP	no	YES	4:9991169:CT-C;exonic_variant,4:9991520:G-C;protein_coding;missense;CCG>CGG;P>R,4:9991521:G-C;protein_coding;missense;CCG>GCG;P>A
AT4G36010	1.0878	2.00811	0.000632064	0.01158	UP	no	NO
AT2G37990	0.384594	4.58419	0.000632276	0.01158	UP	no	NO
AT1G54350	-0.314897	6.37808	0.000634384	0.0116123	DOWN	no	NO
AT4G37295	1.12678	0.190111	0.000635292	0.0116226	UP	no	NO
AT1G52780	-0.404287	4.40746	0.000635776	0.0116252	DOWN	no	NO
AT1G27300	0.379375	4.8417	0.000636876	0.011639	UP	no	NO
AT3G23840	-0.718271	4.4214	0.00063754	0.0116448	DOWN	no	NO
AT5G50800	-1.11261	1.06454	0.000638236	0.0116512	DOWN	no	NO
AT3G10915	-0.396862	4.35143	0.00063941	0.0116663	DOWN	no	NO
AT2G39890	-0.534531	4.06068	0.000639859	0.0116682	DOWN	no	NO
AT4G25100	-0.778683	10.1944	0.000640421	0.0116721	DOWN	no	NO
AT4G22250	-0.666989	1.79562	0.000641237	0.0116806	DOWN	no	NO
AT1G04920	0.907872	1.5388	0.000644151	0.0117274	UP	no	NO
AT1G78150	0.342736	6.22517	0.000645758	0.0117486	UP	no	NO
AT2G41240	6.22122	0.757041	0.000646012	0.0117486	UP	no	NO
AT1G18700	0.335383	5.66978	0.000646773	0.011756	UP	no	NO
AT4G25500	0.40994	6.11977	0.000648489	0.0117785	UP	yes	NO
AT4G29220	-0.340391	6.48016	0.000648873	0.0117785	DOWN	no	NO
AT2G41700	0.341764	5.69569	0.000649056	0.0117785	UP	no	NO
AT3G58690	0.504515	3.12334	0.000650015	0.0117895	UP	no	NO
AT3G49110	-1.16655	3.29752	0.000653124	0.0118395	DOWN	no	NO
AT2G36900	0.370872	4.92206	0.000656059	0.0118863	UP	no	NO
AT1G72160	0.323572	7.188	0.000656747	0.0118924	UP	no	NO
AT1G51950	0.358906	5.74491	0.000658374	0.0119105	UP	no	NO
AT1G34060	-1.13126	1.80858	0.000658451	0.0119105	DOWN	no	NO
AT5G39710	-0.618584	2.78848	0.00066022	0.011935	DOWN	no	NO
AT3G21150	-1.55059	1.95746	0.000660853	0.011935	DOWN	no	NO
AT1G51690	0.302006	6.63784	0.000660872	0.011935	UP	no	NO
AT4G01030	-0.534339	2.45875	0.000664357	0.0119915	DOWN	no	NO
AT1G09660	0.402643	4.66586	0.000671266	0.0121098	UP	no	NO
AT5G64370	-0.426093	5.09634	0.000671885	0.0121144	DOWN	no	NO
AT3G01120	-0.408788	7.96808	0.000674618	0.0121572	DOWN	no	NO
AT5G45850	-0.994084	0.275411	0.000676361	0.0121766	DOWN	no	NO
AT5G48900	-0.396571	5.20049	0.000676417	0.0121766	DOWN	no	NO
AT5G17880	0.376663	4.63327	0.000680828	0.0122494	UP	no	NO
AT4G19010	0.507326	2.95213	0.000681682	0.0122583	UP	no	NO
AT3G09870	3.71557	-2.06543	0.000685232	0.0123155	UP	no	NO
AT5G59220	1.02428	5.82733	0.000685812	0.0123194	UP	no	NO
AT1G72750	0.373647	5.71462	0.000686182	0.0123195	UP	no	NO
AT3G19860	0.333908	6.01365	0.000688855	0.0123609	UP	no	NO
AT4G28740	-0.453217	5.72941	0.000689973	0.0123743	DOWN	no	NO
AT2G32487	-1.53602	0.665675	0.000690522	0.0123776	DOWN	no	NO
AT3G59420	-0.403442	3.81819	0.00069351	0.0124245	DOWN	no	NO
AT1G07470	0.344486	5.13078	0.000695679	0.0124568	UP	no	NO
AT5G19310	0.406227	4.68532	0.000698357	0.0124981	UP	no	NO
AT4G35760	-0.316043	5.88929	0.000701378	0.0125455	DOWN	no	NO
AT5G15240	0.65582	2.93994	0.000702832	0.0125606	UP	no	NO
AT5G06360	0.345135	5.95304	0.000702973	0.0125606	UP	no	NO
AT5G38410	-0.420722	12.2992	0.000703683	0.0125667	DOWN	no	YES	5:15378043:CACCTATAATCCCCAAATCCAATTCCAAATTAATATATCCTATGTTTTGTTTTATTGCACATGACAAAAGACAGTTTTTATTGATGATATT-C;intronic_variant&splice_acceptor_region_variant&splice_donor_region_variant&splice_acceptor_variant&protein_coding
AT1G10540	-1.08509	-0.0109806	0.000707554	0.0126238	DOWN	no	NO
AT2G44500	1.03185	5.12135	0.000707631	0.0126238	UP	no	NO
AT3G55240	-0.714167	5.73835	0.000708823	0.0126321	DOWN	no	NO
AT5G42970	0.354335	4.62598	0.000708846	0.0126321	UP	no	NO
AT5G07980	-0.349065	4.68886	0.000709527	0.0126375	DOWN	no	NO
AT2G21370	-0.340284	5.33593	0.000715028	0.0127288	DOWN	no	NO
AT2G47015	-1.17862	3.19391	0.00071705	0.012758	DOWN	no	NO
AT1G08900	0.388515	5.44338	0.000720467	0.0128121	UP	no	NO
AT3G28160	0.454958	4.42767	0.000722996	0.0128502	UP	no	YES	3:10496355:C-A;exonic_variant
AT3G51500	0.444326	4.11361	0.000725544	0.0128887	UP	no	NO
AT2G40100	-0.945453	3.26666	0.000727687	0.0129193	DOWN	no	NO
AT1G28260	0.392505	5.89807	0.000728033	0.0129193	UP	no	NO
AT3G53530	0.525455	3.6437	0.000730303	0.0129528	UP	no	NO
AT1G08070	0.755495	1.10817	0.000732129	0.012977	UP	no	NO
AT4G22060	1.61627	-0.200486	0.000732681	0.012977	UP	no	NO
AT4G26810	0.732692	1.37845	0.000733111	0.012977	UP	no	NO
AT5G22760	-0.320925	5.48967	0.000733212	0.012977	DOWN	no	NO
AT1G15180	0.332101	5.69543	0.000733799	0.0129806	UP	no	NO
AT2G02180	0.308165	5.51355	0.000736919	0.013029	UP	no	NO
AT5G08600	0.63254	3.23855	0.000740206	0.0130802	UP	no	NO
AT3G49580	-2.07434	2.00769	0.000743838	0.0131375	DOWN	no	NO
AT1G79680	-3.25905	-1.42341	0.000744878	0.013149	DOWN	no	NO
AT2G43240	0.435854	3.73849	0.00074652	0.0131646	UP	no	NO
AT5G24830	-0.445767	3.46064	0.000746545	0.0131646	DOWN	no	NO
AT5G40210	-1.10344	0.724708	0.000748115	0.0131854	DOWN	no	NO
AT4G14746	0.543443	3.41815	0.000750234	0.0132101	UP	no	NO
AT2G17550	0.431822	4.73657	0.0007503	0.0132101	UP	no	NO
AT4G19090	-0.784919	1.3494	0.000750998	0.0132154	DOWN	no	NO
AT3G07050	0.38676	4.91842	0.000752499	0.013229	UP	no	NO
AT2G02400	-0.477975	3.43966	0.000752749	0.013229	DOWN	no	NO
AT2G15830	-0.596197	3.58325	0.000752945	0.013229	DOWN	no	NO
AT4G02890	-0.456894	8.11194	0.000754061	0.0132417	DOWN	no	NO
AT1G06000	-0.607361	3.30752	0.000755035	0.0132475	DOWN	no	NO
AT2G23110	0.917287	1.09228	0.000755501	0.0132475	UP	no	NO
AT2G37690	0.593995	3.94669	0.000755571	0.0132475	UP	no	NO
AT1G35612	-0.369753	5.4002	0.000759736	0.0133136	DOWN	no	NO
AT2G31040	-0.321944	6.73022	0.000761318	0.0133344	DOWN	no	NO
AT3G28040	-0.388771	6.48112	0.000763442	0.0133644	DOWN	no	NO
AT5G43750	-0.336588	6.64523	0.000763827	0.0133644	DOWN	no	NO
AT3G48880	0.348429	4.92164	0.000766631	0.0134065	UP	no	NO
AT5G23700	1.3449	-0.171167	0.000771253	0.0134803	UP	no	NO
AT5G56160	0.562836	2.53213	0.000772469	0.0134812	UP	no	NO
AT1G20450	0.741825	7.33904	0.000772495	0.0134812	UP	no	NO
AT4G26950	-1.21463	-0.326008	0.000772506	0.0134812	DOWN	no	NO
AT3G44205	-0.744858	1.46037	0.000774179	0.0135034	DOWN	no	NO
AT3G24550	0.515001	5.95004	0.000776551	0.0135378	UP	no	NO
AT5G11330	-0.312806	6.06677	0.000777199	0.0135421	DOWN	no	NO
AT5G17780	-0.534697	3.75812	0.000778053	0.0135499	DOWN	no	NO
AT5G67630	0.407676	4.0389	0.000778712	0.0135544	UP	no	NO
AT5G44565	-1.96761	-1.49599	0.000783003	0.0136185	DOWN	no	NO
AT3G01160	0.430549	4.11922	0.000783205	0.0136185	UP	no	NO
AT4G04972	1.41382	-1.17311	0.000783904	0.0136237	UP	no	NO
AT5G14940	-0.617082	2.79105	0.000786803	0.0136659	DOWN	no	NO
AT1G03730	0.633998	2.22195	0.000787143	0.0136659	UP	no	NO
AT1G49430	0.346392	5.39467	0.00078919	0.0136943	UP	no	NO
AT1G75300	-1.49168	0.486561	0.000792109	0.0137379	DOWN	no	NO
AT3G54920	0.671277	5.95892	0.000793816	0.0137593	UP	no	NO
AT2G21120	0.323826	5.40922	0.000794159	0.0137593	UP	no	NO
AT3G23880	0.501993	4.50027	0.000797665	0.0138129	UP	no	NO
AT2G37025	0.698137	4.03598	0.00080173	0.0138762	UP	no	NO
AT5G48850	-1.83645	2.73748	0.000802785	0.0138873	DOWN	no	NO
AT3G24010	0.373017	4.42099	0.000813809	0.0140692	UP	no	NO
AT2G40290	0.333741	5.62973	0.000814138	0.0140692	UP	no	NO
AT5G41190	0.359539	4.68957	0.000817537	0.0141208	UP	no	NO
AT4G05320	-0.333414	10.5996	0.000822366	0.0141956	DOWN	no	NO
AT1G42470	0.378713	5.91687	0.000822712	0.0141956	UP	no	NO
AT5G65310	-0.462353	6.20821	0.000823296	0.0141984	DOWN	no	NO
AT4G27540	0.476336	3.46286	0.000824791	0.0142109	UP	no	NO
AT5G57320	0.559064	2.6556	0.000824868	0.0142109	UP	no	NO
AT1G80840	1.14772	3.95408	0.000833179	0.0143411	UP	no	NO
AT4G20380	0.349702	5.20096	0.000833275	0.0143411	UP	no	NO
AT3G54170	0.370436	4.35189	0.000833914	0.0143448	UP	no	NO
AT4G28630	0.395189	4.49663	0.000839376	0.0144314	UP	no	NO
AT1G17680	0.323972	5.11854	0.000842161	0.0144718	UP	no	NO
AT1G64660	0.436431	7.25358	0.000843949	0.0144952	UP	no	NO
AT5G39730	-0.338882	5.28049	0.000844607	0.0144991	DOWN	no	NO
AT1G78940	-0.907433	0.667686	0.000845289	0.0145034	DOWN	no	NO
AT2G45100	0.496096	3.09718	0.000847741	0.0145352	UP	no	NO
AT3G61210	0.477886	5.13583	0.000848007	0.0145352	UP	no	NO
AT5G34800	-1.12194	0.339699	0.000855918	0.0146634	DOWN	no	NO
AT3G03880	0.441686	4.20223	0.000857404	0.0146814	UP	no	NO
AT1G07840	0.398893	4.17326	0.000861217	0.0147373	UP	no	NO
AT2G47770	1.37579	3.76988	0.000861546	0.0147373	UP	no	NO
AT5G22580	-0.583973	6.24954	0.000863802	0.0147684	DOWN	no	NO
AT4G01400	-0.805211	0.645004	0.000869083	0.0148511	DOWN	no	NO
AT5G48380	0.495751	4.95956	0.000870172	0.0148622	UP	no	NO
AT5G03120	0.896379	2.92295	0.000872259	0.0148903	UP	no	NO
AT1G15940	0.324242	5.71178	0.000876034	0.0149472	UP	no	NO
AT1G35560	-0.584404	3.39531	0.000877556	0.0149568	DOWN	no	NO
AT3G51550	0.397637	7.64456	0.000877559	0.0149568	UP	no	NO
AT1G54010	-0.807533	5.1885	0.000877934	0.0149568	DOWN	no	NO
AT3G50240	0.348791	5.66043	0.000879212	0.0149681	UP	no	NO
AT4G17840	-0.350066	7.21522	0.000879484	0.0149681	DOWN	no	NO
AT1G72900	0.984421	4.53056	0.000881057	0.0149821	UP	no	NO
AT1G80180	0.335771	7.5571	0.000881193	0.0149821	UP	no	NO
AT4G21280	-0.313791	9.62187	0.000885233	0.0150431	DOWN	no	NO
AT3G53630	0.439485	5.0738	0.000887994	0.0150758	UP	no	NO
AT3G21950	-0.904078	1.25122	0.00088805	0.0150758	DOWN	no	NO
AT5G17050	-0.417032	4.46592	0.0008898	0.0150979	DOWN	no	NO
AT2G36930	0.328883	5.51577	0.000890866	0.0151084	UP	no	NO
AT3G30460	-1.43222	-0.236855	0.000898404	0.0152286	DOWN	no	NO
AT5G21326	0.333292	6.34653	0.00090087	0.0152627	UP	no	NO
AT2G36980	-0.791012	0.986725	0.000904362	0.0153141	DOWN	no	NO
AT5G17890	-0.38023	5.13839	0.00090549	0.0153255	DOWN	no	NO
AT2G40360	0.371447	5.53192	0.000911646	0.015422	UP	no	NO
AT3G22640	1.47259	2.1357	0.00091263	0.0154309	UP	no	NO
AT5G19290	-0.318719	5.73481	0.000919113	0.0155327	DOWN	no	NO
AT5G02230	-0.61113	5.71275	0.00091993	0.0155387	DOWN	no	NO
AT2G40200	-1.06552	-0.0824458	0.000924941	0.0156072	DOWN	no	NO
AT1G10930	0.371373	4.62545	0.000925325	0.0156072	UP	no	NO
AT1G12450	0.526482	3.52846	0.000925417	0.0156072	UP	no	NO
AT5G47140	-0.459391	3.80744	0.000925836	0.0156072	DOWN	no	NO
AT1G48090	-0.321761	6.7403	0.00092853	0.0156447	DOWN	no	YES	1:17752795:G-A;protein_coding;missense;CTC>TTC;L>F,1:17752795:G-A;exonic_variant
[truncated: 861 more rows]

## Sheet: cwc16a-3
Gene ID	logFC	logCPM	PValue	FDR	Direction of change	In Koncz list?	has SNP/indels?	SNPs/indels
AT1G24825	-4.24342	6.60612	4.06475e-220	1.36905e-215	DOWN	no	NO
AT1G25175	1.95139	7.96333	1.36987e-62	2.30693e-58	UP	no	NO
AT5G18500	-1.64249	5.54755	4.78397e-62	5.37096e-58	DOWN	no	YES	5:6140226:G-A;protein_coding;stop-gain;TGG>TGA;W>*,5:6140226:G-A;intronic_variant
AT3G30720	2.78904	3.53639	1.28302e-43	1.08033e-39	UP	no	NO
AT1G49730	1.26221	5.83725	2.99705e-36	2.01887e-32	UP	no	NO
AT3G07300	1.29593	5.56565	4.65742e-36	2.61444e-32	UP	no	NO
AT3G47630	1.30317	4.46118	2.25161e-35	1.08338e-31	UP	no	NO
AT5G45710	1.35945	4.89621	5.11176e-34	2.15212e-30	UP	no	NO
AT2G20815	1.58415	4.04614	6.37941e-33	2.38739e-29	UP	no	NO
AT2G27830	1.28937	6.86583	6.66513e-31	2.24488e-27	UP	no	NO
AT3G14075	1.09464	4.97881	7.73927e-30	2.36969e-26	UP	no	NO
AT4G20060	1.34701	4.2597	2.98896e-28	8.38927e-25	UP	no	NO
AT1G27921	-2.79034	1.90487	8.21422e-28	2.12818e-24	DOWN	no	NO
AT3G05380	1.15053	5.60556	1.1524e-27	2.77243e-24	UP	no	NO
AT4G32480	1.39703	6.39643	1.94993e-26	4.37838e-23	UP	no	NO
AT2G36070	1.10373	5.16145	3.02137e-26	6.36018e-23	UP	no	NO
AT4G21880	1.83005	3.36543	4.42662e-25	8.77018e-22	UP	no	NO
AT2G02130	-1.80877	5.39413	9.54949e-25	1.78687e-21	DOWN	no	YES	2:540101:G-GCTCTTCTCTTGTTCATGGTATTCATTGCCACA;splice_donor_region_variant&exonic_variant&protein_coding
AT5G10140	3.05694	2.68459	7.3428e-22	1.30165e-18	UP	no	NO
AT3G22435	8.4038	-1.95627	3.46545e-21	5.83599e-18	UP	no	NO
AT5G59960	0.967357	6.93223	5.56088e-21	8.86524e-18	UP	no	NO
AT2G47410	0.924823	6.59564	5.79066e-21	8.86524e-18	UP	no	NO
AT4G37260	1.74372	5.92708	3.85894e-20	5.651e-17	UP	no	YES	4:17540762:G-A;protein_coding;missense;CGG>CAG;R>Q
AT5G01770	0.988119	4.58914	4.6152e-20	6.47686e-17	UP	no	NO
AT3G02860	0.951762	5.26742	7.24844e-20	9.76539e-17	UP	yes	YES	3:625208:T-TC;exonic_variant
AT5G47900	1.0741	4.91109	8.14219e-20	1.05476e-16	UP	no	NO
AT1G55750	0.915205	4.84152	1.72833e-19	2.156e-16	UP	no	NO
AT4G16680	-1.6295	3.55707	2.0364e-19	2.44957e-16	DOWN	no	YES	4:9390455:C-CCTTCTTAGGCATCTTCACACCATCATTCAACATAATCTCGTCTTTGA;exonic_variant&protein_coding,4:9390455:C-CCTTCTTAGGCATCTTCACACCATCATTCAACATAATCTCGTCTTTGA;exonic_variant&splice_donor_region_variant&protein_coding
AT3G57660	0.951624	4.91694	6.51454e-19	7.56608e-16	UP	no	NO
AT3G54500	-0.910983	8.42956	7.33574e-19	8.23584e-16	DOWN	no	YES	3:20175528:CA-C;exonic_variant
AT1G29940	1.04261	5.0125	1.8883e-18	2.05161e-15	UP	no	NO
AT5G06120	0.83124	6.06256	2.49536e-18	2.62644e-15	UP	no	YES	5:1848991:T-C;exonic_variant,5:1848991:T-C;protein_coding;sense;TTG>CTG;L>L
AT1G65950	0.930772	4.85278	2.77063e-18	2.82781e-15	UP	no	NO
AT3G43850	1.74162	3.17444	4.60303e-18	4.55984e-15	UP	no	NO
AT3G27000	1.08852	3.83805	5.61699e-18	5.37994e-15	UP	no	NO
AT5G53010	0.905021	4.73742	5.75036e-18	5.37994e-15	UP	no	NO
AT3G15180	1.0295	4.68104	6.19147e-18	5.63608e-15	UP	no	NO
AT5G40580	0.822232	5.27195	9.89334e-18	8.76889e-15	UP	no	NO
AT1G25560	1.07619	7.47758	4.10805e-17	3.54777e-14	UP	no	NO
AT2G30070	0.892847	5.21242	4.33018e-17	3.64612e-14	UP	no	NO
AT1G73500	1.27702	4.88233	4.70779e-17	3.86739e-14	UP	no	NO
AT1G12930	0.840633	5.25153	5.4017e-17	4.33178e-14	UP	no	YES	1:4400215:C-T;exonic_variant,1:4400215:C-T;protein_coding;missense;GCA>ACA;A>T
AT3G52340	0.888724	7.78398	7.14668e-17	5.59784e-14	UP	no	NO
AT5G57560	1.96693	8.27495	1.49835e-16	1.14695e-13	UP	no	NO
AT1G09100	0.896245	4.68376	1.90015e-16	1.4222e-13	UP	no	NO
AT5G17250	1.01282	4.10618	2.13751e-16	1.56508e-13	UP	no	NO
AT1G27360	1.15031	4.09434	2.4616e-16	1.76402e-13	UP	no	NO
AT2G10600	7.67944	-1.71667	5.13521e-16	3.60331e-13	UP	no	NO
AT5G64060	2.60407	0.263572	5.46878e-16	3.75906e-13	UP	no	NO
AT3G03300	1.00583	5.86304	9.5749e-16	6.44984e-13	UP	no	NO
AT2G40700	0.955086	4.03586	2.24993e-15	1.48588e-12	UP	no	NO
AT1G19650	0.882145	5.82668	2.43284e-15	1.57578e-12	UP	no	YES	1:6799746:C-CT;exonic_variant
AT2G01690	0.723012	6.4146	3.82255e-15	2.4292e-12	UP	no	NO
AT1G64440	0.855486	4.79739	5.99584e-15	3.73974e-12	UP	no	NO
AT4G28040	0.989637	7.00689	7.46291e-15	4.57015e-12	UP	no	NO
AT5G50780	0.834598	4.84515	7.93063e-15	4.76985e-12	UP	no	NO
AT1G12750	0.975588	4.67189	9.35282e-15	5.52653e-12	UP	no	NO
AT5G20000	0.814688	5.09134	1.65789e-14	9.62747e-12	UP	no	NO
AT1G29030	0.96164	3.85855	1.71255e-14	9.77634e-12	UP	no	NO
AT5G57160	0.792885	4.94689	2.09987e-14	1.17876e-11	UP	no	NO
AT3G25840	-0.79249	6.08487	3.97516e-14	2.19487e-11	DOWN	yes	NO
AT2G44130	1.03605	6.16369	6.37709e-14	3.4643e-11	UP	no	NO
AT4G02560	0.705403	5.49649	7.68175e-14	4.10681e-11	UP	no	NO
AT1G28090	0.766307	4.74848	1.06662e-13	5.61324e-11	UP	no	NO
AT4G35740	0.904082	4.01811	1.09123e-13	5.65439e-11	UP	no	NO
AT2G31902	-2.34108	0.952223	1.15085e-13	5.87301e-11	DOWN	no	NO
AT3G48360	1.99316	8.12629	1.21936e-13	6.12976e-11	UP	no	NO
AT3G25740	-0.991345	3.84448	1.54069e-13	7.63119e-11	DOWN	no	YES	3:9397915:G-A;splice_donor_variant
AT2G20670	1.29882	8.99804	2.16917e-13	1.05884e-10	UP	no	NO
AT2G25850	-0.851537	4.81577	2.67007e-13	1.28473e-10	DOWN	no	NO
AT5G07380	1.34413	2.39098	3.52658e-13	1.67294e-10	UP	no	NO
AT3G05200	0.868434	5.03556	3.78351e-13	1.76989e-10	UP	no	NO
AT4G10250	4.85518	-0.957021	3.94251e-13	1.79497e-10	UP	no	NO
AT1G25682	-0.795713	4.23882	3.94369e-13	1.79497e-10	DOWN	yes	YES	1:9004043:C-T;exonic_variant
AT4G12020	0.84446	5.74491	7.39022e-13	3.3188e-10	UP	no	NO
AT4G36730	0.705953	6.77622	7.85279e-13	3.48013e-10	UP	no	NO
AT5G25150	0.729569	5.1024	8.69045e-13	3.80134e-10	UP	no	NO
AT5G13950	0.681246	6.78195	9.93685e-13	4.29081e-10	UP	no	NO
AT3G60530	0.924676	7.30162	1.10931e-12	4.72945e-10	UP	no	NO
AT3G45443	0.87447	4.64276	1.31913e-12	5.55372e-10	UP	no	NO
AT1G79810	0.723281	4.74664	1.36392e-12	5.67139e-10	UP	no	NO
AT3G54190	0.664647	6.162	1.56593e-12	6.43195e-10	UP	no	YES	3:20062462:C-T;splice_donor_variant
AT1G25400	1.94995	2.83007	1.60125e-12	6.4978e-10	UP	no	NO
AT5G12020	4.25893	0.460405	1.99015e-12	7.97978e-10	UP	no	NO
AT3G59330	-1.31683	2.56931	2.36939e-12	9.38865e-10	DOWN	no	NO
AT3G43210	0.966159	4.25691	2.93327e-12	1.14878e-09	UP	no	NO
AT4G27820	0.823259	6.21878	3.02546e-12	1.17127e-09	UP	no	NO
AT3G02300	-0.757351	5.73495	3.59066e-12	1.37428e-09	DOWN	no	NO
AT3G07350	1.23898	6.4061	5.411e-12	2.04773e-09	UP	no	NO
AT1G22190	0.786602	5.96143	5.64771e-12	2.11356e-09	UP	no	NO
AT5G42200	1.2034	3.44466	5.98749e-12	2.2161e-09	UP	no	NO
AT2G14050	-1.40552	2.07302	6.20123e-12	2.27026e-09	DOWN	no	YES	2:5913947:A-AG;exonic_variant,2:5913947:A-AG;exonic_variant&protein_coding
AT1G30590	-0.712183	5.64524	7.2591e-12	2.62896e-09	DOWN	no	NO
AT3G56990	0.882797	4.10958	9.74691e-12	3.4924e-09	UP	no	YES	3:21091221:C-T;intronic_variant
AT4G38200	0.723103	5.29131	1.11041e-11	3.93683e-09	UP	no	YES	4:17919850:G-A;splice_donor_variant
AT2G26780	0.66645	6.06871	1.15573e-11	4.0548e-09	UP	no	YES	2:11418987:G-A;intronic_variant
AT1G77890	0.858478	4.06049	1.53276e-11	5.32214e-09	UP	no	NO
AT4G25990	1.16011	2.93862	1.74872e-11	6.01008e-09	UP	no	NO
AT4G28703	1.31551	2.81475	1.83436e-11	6.24073e-09	UP	no	NO
AT1G76590	1.01615	4.35775	1.92683e-11	6.48974e-09	UP	no	NO
AT2G38790	0.912086	4.32961	2.16473e-11	7.21884e-09	UP	no	YES	2:16214635:C-T;protein_coding;missense;GTT>ATT;V>I
AT2G20570	-0.947681	6.67483	2.58496e-11	8.53568e-09	DOWN	no	NO
AT4G08035	-0.798318	4.50553	3.32693e-11	1.08791e-08	DOWN	no	NO
AT2G39630	0.644179	5.28159	4.02723e-11	1.30424e-08	UP	no	NO
AT5G67240	0.696362	5.30934	4.63557e-11	1.48696e-08	UP	no	NO
AT4G27410	1.45316	6.77925	5.27264e-11	1.67536e-08	UP	no	NO
AT2G46440	-2.46677	0.0810471	6.59413e-11	2.07567e-08	DOWN	no	NO
AT3G18160	0.679685	4.4093	8.63936e-11	2.69428e-08	UP	no	NO
AT3G17700	0.730002	4.37739	8.79302e-11	2.71704e-08	UP	no	NO
AT5G35935	1.10579	3.60734	9.26659e-11	2.83735e-08	UP	no	NO
AT3G08960	0.617335	5.44591	1.02194e-10	3.10091e-08	UP	no	NO
AT5G38420	-0.699963	10.8821	1.09352e-10	3.27864e-08	DOWN	no	YES	5:15381715:CACCTATAAATTCGAATTCCCAATTATTCTAAAGTATTGTTCAGTTGCACTAATTGCACATGACAAAAGACAGTTTTCATTAATGACATTT-C;intronic_variant&splice_acceptor_region_variant&splice_donor_region_variant&splice_acceptor_variant&protein_coding
AT3G15500	1.60918	4.379	1.09999e-10	3.27864e-08	UP	no	NO
AT5G64760	0.736524	4.29838	1.14864e-10	3.39363e-08	UP	no	NO
AT1G30470	0.582143	6.32752	1.15891e-10	3.39418e-08	UP	no	NO
AT2G27980	0.600522	5.82915	1.36859e-10	3.97375e-08	UP	no	NO
AT1G68990	0.784829	4.53434	2.24782e-10	6.47083e-08	UP	no	NO
AT5G12030	3.38875	1.31252	2.29066e-10	6.53829e-08	UP	no	NO
AT4G37220	1.50366	2.75674	2.63608e-10	7.461e-08	UP	no	NO
AT4G27280	2.0049	5.33425	2.73891e-10	7.68745e-08	UP	no	NO
AT5G45140	0.805013	4.8057	3.05346e-10	8.48329e-08	UP	no	NO
AT2G33990	0.7722	4.46106	3.07284e-10	8.48329e-08	UP	no	NO
AT1G73430	0.593585	5.81618	3.11108e-10	8.51904e-08	UP	no	NO
AT1G08890	0.846037	5.19885	3.14683e-10	8.54746e-08	UP	no	NO
AT4G25580	2.67025	5.01042	3.20796e-10	8.64379e-08	UP	no	NO
AT4G24840	0.60937	5.40269	3.24359e-10	8.65936e-08	UP	no	NO
AT3G53800	0.782285	6.0382	3.29973e-10	8.65936e-08	UP	no	NO
AT4G38840	-1.23508	4.64839	3.30399e-10	8.65936e-08	DOWN	no	NO
AT5G63160	1.50943	7.28042	3.31658e-10	8.65936e-08	UP	no	NO
AT2G14080	-0.618302	5.65244	3.5069e-10	9.08584e-08	DOWN	no	NO
AT3G11440	0.976129	3.15662	3.80849e-10	9.7919e-08	UP	no	NO
AT1G32920	1.32835	5.22096	4.29034e-10	1.09472e-07	UP	no	NO
AT4G33467	2.43676	3.04643	4.96683e-10	1.2578e-07	UP	no	NO
AT4G36140	0.682832	5.25478	5.05346e-10	1.27019e-07	UP	no	NO
AT3G11964	0.668696	5.39464	5.12418e-10	1.27843e-07	UP	no	NO
AT5G45630	3.30164	1.01213	5.75682e-10	1.4257e-07	UP	no	NO
AT1G34315	-1.31102	2.19184	6.0723e-10	1.49285e-07	DOWN	no	NO
AT5G59780	-0.726251	6.97756	6.15514e-10	1.50225e-07	DOWN	no	NO
AT4G17500	1.39309	5.34651	6.28197e-10	1.52218e-07	UP	no	NO
AT3G09450	-1.88808	2.45567	6.37694e-10	1.53416e-07	DOWN	no	NO
AT4G19170	-0.724916	8.36043	6.91401e-10	1.65157e-07	DOWN	no	NO
AT1G74310	1.51444	4.0842	6.99659e-10	1.65952e-07	UP	no	NO
AT3G07980	0.692149	4.47463	7.46162e-10	1.75745e-07	UP	no	NO
AT3G08020	0.608663	5.5222	7.88026e-10	1.84316e-07	UP	no	NO
AT1G48635	0.632564	5.04088	7.94596e-10	1.84571e-07	UP	no	NO
AT3G01800	1.077	2.91728	8.02723e-10	1.85182e-07	UP	no	NO
AT4G38120	0.61044	5.3212	8.59384e-10	1.96904e-07	UP	no	NO
AT5G01820	-0.783668	5.99455	9.10132e-10	2.07123e-07	DOWN	no	NO
AT5G59550	0.748423	4.20874	9.83563e-10	2.22332e-07	UP	no	NO
AT3G45730	0.780067	4.58504	1.03481e-09	2.30865e-07	UP	no	NO
AT1G09300	0.835676	3.49118	1.03502e-09	2.30865e-07	UP	no	YES	1:3008063:A-AG;exonic_variant&protein_coding,1:3008063:A-AG;exonic_variant
AT1G25550	0.773089	7.22237	1.10052e-09	2.43858e-07	UP	no	NO
AT4G10470	-0.744812	3.66208	1.11633e-09	2.45745e-07	DOWN	no	NO
AT1G27730	1.62996	3.84951	1.13268e-09	2.47725e-07	UP	no	NO
AT4G31060	0.875575	3.46696	1.22629e-09	2.66468e-07	UP	no	NO
AT5G25240	1.59095	3.38301	1.52469e-09	3.29187e-07	UP	no	NO
AT5G12980	0.876562	3.58287	1.61227e-09	3.44533e-07	UP	no	NO
AT2G47310	0.836202	3.46115	1.61623e-09	3.44533e-07	UP	no	NO
AT3G07530	0.894919	3.06121	1.65669e-09	3.50937e-07	UP	no	NO
AT1G49470	-1.06083	3.77513	1.69832e-09	3.57508e-07	DOWN	no	NO
AT1G30490	0.675102	5.37251	1.74795e-09	3.65669e-07	UP	no	NO
AT3G27990	0.636429	4.64291	1.76918e-09	3.67825e-07	UP	no	NO
AT4G23870	1.31996	5.73833	2.0896e-09	4.31778e-07	UP	no	NO
AT5G47370	0.761254	5.59976	2.14846e-09	4.41234e-07	UP	no	NO
AT3G06530	0.745067	4.87542	2.2309e-09	4.55388e-07	UP	no	NO
AT5G11720	0.596568	6.12696	2.33006e-09	4.72763e-07	UP	no	NO
AT5G61600	1.98753	4.22746	2.46088e-09	4.96317e-07	UP	no	NO
AT3G20340	1.19141	2.93937	3.52281e-09	7.06261e-07	UP	no	NO
AT2G41410	0.682766	6.69914	3.74007e-09	7.4538e-07	UP	no	NO
AT3G26510	0.894769	6.93597	3.85464e-09	7.63694e-07	UP	no	NO
AT2G46270	0.891461	6.05896	3.91278e-09	7.7068e-07	UP	no	NO
AT4G36850	0.86595	8.51962	4.00255e-09	7.83778e-07	UP	no	YES	4:17354711:GA-G;intronic_variant,4:17353918:GA-G;splice_acceptor_region_variant
AT3G60670	1.08717	1.86288	4.03874e-09	7.86294e-07	UP	no	NO
ATCG00860	1.57314	0.374489	4.14996e-09	8.03304e-07	UP	no	NO
AT1G21100	-0.988751	4.74549	4.36429e-09	8.39963e-07	DOWN	no	NO
AT1G14310	0.71065	4.16583	4.48082e-09	8.57491e-07	UP	no	NO
AT5G49190	1.27037	1.79741	4.77815e-09	9.09225e-07	UP	no	NO
AT1G63810	0.813556	4.11162	5.04492e-09	9.50117e-07	UP	no	NO
AT1G03190	0.706335	3.97423	5.04946e-09	9.50117e-07	UP	no	NO
AT1G80440	0.891844	8.33908	5.45196e-09	1.02015e-06	UP	no	NO
AT5G21940	1.07536	7.45763	5.49551e-09	1.02262e-06	UP	no	NO
AT4G10910	1.09836	3.08744	5.54758e-09	1.02283e-06	UP	no	NO
AT1G79210	0.595028	5.55928	5.5574e-09	1.02283e-06	UP	no	NO
AT4G33760	0.587722	5.47916	5.83428e-09	1.06796e-06	UP	no	YES	4:16193114:G-A;protein_coding;sense;TCC>TCT;S>S
AT1G79410	-1.34088	2.47288	6.56259e-09	1.19478e-06	DOWN	no	NO
AT5G56100	0.943043	5.09392	6.61852e-09	1.19849e-06	UP	no	NO
AT1G49040	0.555367	5.89195	6.93588e-09	1.24924e-06	UP	no	NO
AT5G22750	0.755276	3.68913	7.2144e-09	1.28962e-06	UP	no	NO
AT4G26288	1.30482	4.20031	7.23669e-09	1.28962e-06	UP	no	NO
AT3G62950	1.97911	3.83447	7.35959e-09	1.30462e-06	UP	no	NO
AT3G04490	0.544283	5.65249	7.87964e-09	1.3895e-06	UP	no	NO
AT4G04940	1.00789	2.9776	8.11812e-09	1.4241e-06	UP	no	NO
AT3G33528	-1.65418	-0.0231424	9.16567e-09	1.59953e-06	DOWN	no	NO
AT3G54600	-1.11663	5.10736	9.55644e-09	1.65913e-06	DOWN	no	NO
AT1G64900	-0.728889	5.94513	9.70834e-09	1.67192e-06	DOWN	no	YES	1:24113713:C-T;protein_coding;missense;TCT>TTT;S>F
AT3G55840	1.45126	1.39821	9.72942e-09	1.67192e-06	UP	no	NO
AT5G39160	0.990408	3.47052	1.02812e-08	1.75421e-06	UP	no	NO
AT3G50060	1.7925	4.37454	1.0364e-08	1.75421e-06	UP	no	NO
AT1G26800	0.657698	4.95318	1.03645e-08	1.75421e-06	UP	no	NO
AT3G48390	1.12083	3.6404	1.05623e-08	1.77875e-06	UP	no	NO
AT1G13530	1.5812	1.59324	1.08908e-08	1.82493e-06	UP	no	NO
AT3G52800	0.629087	5.65469	1.12548e-08	1.87659e-06	UP	no	NO
AT1G27100	0.619277	6.33295	1.22594e-08	2.03404e-06	UP	no	NO
AT1G04000	-0.825109	3.1653	1.23259e-08	2.03505e-06	DOWN	no	NO
AT2G40000	1.34601	8.65069	1.27046e-08	2.08733e-06	UP	no	NO
AT3G52070	0.84113	4.03397	1.36311e-08	2.22869e-06	UP	no	NO
AT5G46270	-0.600085	4.6932	1.43687e-08	2.33793e-06	DOWN	no	NO
AT1G15290	0.585418	8.19728	1.51427e-08	2.45202e-06	UP	no	NO
AT5G50450	0.962516	4.20303	1.55658e-08	2.49781e-06	UP	no	NO
AT1G70430	1.01362	2.41793	1.55738e-08	2.49781e-06	UP	no	NO
AT1G52100	-0.607978	5.61762	1.62796e-08	2.59865e-06	DOWN	no	YES	1:19383685:A-AC;splice_donor_variant,1:19383685:A-AC;exonic_variant&protein_coding
AT2G25740	0.644036	4.60828	1.67538e-08	2.66172e-06	UP	no	NO
AT2G29210	0.532544	6.28921	1.72488e-08	2.72749e-06	UP	yes	NO
AT5G51190	2.12107	2.71328	1.74373e-08	2.74441e-06	UP	no	NO
AT2G42270	-0.718396	5.19703	1.80017e-08	2.82008e-06	DOWN	no	NO
AT3G04730	0.519508	7.98993	1.88428e-08	2.93816e-06	UP	no	NO
AT3G05370	-0.811371	3.39099	1.91957e-08	2.96805e-06	DOWN	no	NO
AT3G47675	1.03335	2.33492	1.92107e-08	2.96805e-06	UP	no	NO
AT4G06477	6.58561	-2.40192	1.9423e-08	2.98715e-06	UP	no	YES	4:3061276:T-C;exonic_variant,4:3061247:C-G;exonic_variant,4:3061320:A-G;exonic_variant
AT3G49790	0.910791	6.30125	2.05864e-08	3.14467e-06	UP	no	NO
AT3G55980	1.54046	5.7935	2.06339e-08	3.14467e-06	UP	no	NO
AT2G25200	0.985545	5.00652	2.11398e-08	3.20725e-06	UP	no	NO
AT5G07300	0.525452	6.01013	2.52993e-08	3.8211e-06	UP	no	NO
AT3G17970	0.542715	5.27457	2.64421e-08	3.96371e-06	UP	no	NO
AT5G09820	0.667561	4.50909	2.64789e-08	3.96371e-06	UP	no	NO
AT3G45970	1.18192	3.68145	3.13102e-08	4.66619e-06	UP	no	NO
AT1G35140	1.46114	4.8001	3.34081e-08	4.93579e-06	UP	no	NO
AT1G02475	-0.604596	5.6782	3.34123e-08	4.93579e-06	DOWN	no	NO
AT4G22350	0.607601	4.37306	3.3694e-08	4.95567e-06	UP	yes	NO
AT3G11270	0.641931	4.0287	3.55874e-08	5.21139e-06	UP	no	NO
AT1G55920	-0.789151	5.89986	3.64839e-08	5.31955e-06	DOWN	no	NO
AT1G69890	1.22399	4.12764	3.67553e-08	5.33602e-06	UP	no	NO
AT5G45340	1.58781	2.28309	3.80681e-08	5.50289e-06	UP	no	NO
AT2G41100	1.2424	6.39848	3.88982e-08	5.59885e-06	UP	no	NO
AT3G26932	-0.607652	4.64728	3.94984e-08	5.66104e-06	DOWN	no	NO
AT2G43100	-1.55529	4.69501	4.10573e-08	5.85954e-06	DOWN	no	NO
AT2G15480	-0.805714	3.46776	4.18973e-08	5.95419e-06	DOWN	no	NO
AT1G73490	0.524718	5.53347	4.35197e-08	6.15876e-06	UP	no	NO
AT3G07740	0.610111	4.28916	4.5008e-08	6.34274e-06	UP	no	NO
AT1G53540	3.20421	-0.0340934	4.63957e-08	6.51105e-06	UP	no	NO
AT4G37550	0.540722	6.99783	4.76768e-08	6.66308e-06	UP	no	NO
AT3G28210	1.68048	0.316123	4.86339e-08	6.76875e-06	UP	no	NO
AT1G58602	-0.816217	5.92677	4.97901e-08	6.90115e-06	DOWN	no	YES	1:21752770:A-AC;exonic_variant,1:21763990:T-A;intronic_variant,1:21765160:G-A;protein_coding;sense;GGG>GGA;G>G,1:21765160:G-A;exonic_variant,1:21752770:A-AC;intronic_variant
AT5G08150	1.39922	1.73143	5.0317e-08	6.94365e-06	UP	no	NO
AT5G42790	0.535359	6.40227	5.0509e-08	6.94365e-06	UP	no	NO
AT3G04240	0.488475	6.95213	5.11011e-08	6.99649e-06	UP	no	NO
AT5G66650	1.12964	3.88261	5.48126e-08	7.47426e-06	UP	no	NO
AT5G20980	0.629974	4.18976	5.98849e-08	8.133e-06	UP	no	NO
AT5G07270	0.541762	5.12717	6.21454e-08	8.39388e-06	UP	no	NO
AT3G62360	0.532214	6.68197	6.23042e-08	8.39388e-06	UP	no	NO
AT2G26630	2.02741	-0.5603	6.5531e-08	8.79343e-06	UP	no	NO
AT2G17510	0.520074	5.59784	6.62323e-08	8.85226e-06	UP	yes	NO
AT5G16370	0.738707	7.00908	6.70695e-08	8.92693e-06	UP	no	NO
AT2G41210	0.705831	5.12498	6.7321e-08	8.92693e-06	UP	no	NO
AT1G44910	0.555745	5.33353	6.90607e-08	9.12169e-06	UP	yes	YES	1:16977617:C-CTT;intronic_variant
AT2G44950	0.530342	5.50156	7.04473e-08	9.26849e-06	UP	no	YES	2:18542778:C-T;intronic_variant
AT2G19650	-1.22943	2.8982	7.44366e-08	9.75525e-06	DOWN	no	NO
AT1G45201	-1.06292	6.04403	7.68269e-08	9.98926e-06	DOWN	no	NO
AT4G17490	1.91932	2.90353	7.69989e-08	9.98926e-06	UP	no	NO
AT2G19810	0.879443	6.06127	7.74046e-08	9.98926e-06	UP	no	NO
AT3G55630	0.677192	6.61646	7.76198e-08	9.98926e-06	UP	no	NO
AT3G46600	1.31099	6.38914	7.77051e-08	9.98926e-06	UP	no	NO
AT1G17970	0.599256	4.56543	7.98201e-08	1.02221e-05	UP	no	NO
AT4G24230	1.0034	6.74482	8.29429e-08	1.05818e-05	UP	no	NO
AT5G45275	0.76388	3.94997	8.54512e-08	1.08607e-05	UP	no	NO
AT5G09900	0.496459	6.65058	8.64219e-08	1.09428e-05	UP	no	NO
AT2G29120	-1.00544	2.78077	8.71765e-08	1.0997e-05	DOWN	no	NO
AT4G24340	-3.63169	0.900696	9.20608e-08	1.15296e-05	DOWN	no	NO
AT1G53165	0.53533	5.03995	9.20835e-08	1.15296e-05	UP	no	NO
AT5G63460	0.601079	4.70186	9.44057e-08	1.17766e-05	UP	no	NO
AT4G35270	-0.623167	4.41939	9.50055e-08	1.18077e-05	DOWN	no	NO
AT5G41240	0.580076	4.4387	9.64536e-08	1.19384e-05	UP	no	NO
AT3G04110	-0.802828	3.7278	9.67659e-08	1.19384e-05	DOWN	no	NO
AT2G27770	0.715926	4.29883	9.74154e-08	1.19746e-05	UP	no	NO
AT5G19120	0.878487	7.81136	9.85956e-08	1.20545e-05	UP	no	NO
AT3G12140	0.499231	5.49579	9.89024e-08	1.20545e-05	UP	no	NO
AT5G38150	-0.782437	4.62801	9.91385e-08	1.20545e-05	DOWN	no	NO
AT5G66800	1.25131	1.46293	9.95826e-08	1.20649e-05	UP	no	NO
AT4G10070	0.607232	4.57776	1.00139e-07	1.20888e-05	UP	no	NO
AT3G16530	-3.25892	2.40011	1.02372e-07	1.2285e-05	DOWN	no	NO
AT5G38650	0.543319	5.05965	1.02494e-07	1.2285e-05	UP	no	NO
AT4G14270	0.621868	7.45632	1.07617e-07	1.28146e-05	UP	no	NO
AT5G11170	0.501337	7.63697	1.07673e-07	1.28146e-05	UP	yes	NO
AT4G21810	0.51461	6.08397	1.10967e-07	1.31602e-05	UP	no	NO
AT1G68840	0.967928	7.71243	1.14919e-07	1.3581e-05	UP	no	NO
AT2G22240	-0.581768	5.9424	1.18609e-07	1.39681e-05	DOWN	no	NO
AT2G29420	-0.962572	4.17979	1.19475e-07	1.40211e-05	DOWN	no	NO
AT2G19730	0.654502	6.88763	1.31046e-07	1.53255e-05	UP	no	NO
AT3G10020	0.494239	7.85703	1.40381e-07	1.63604e-05	UP	no	NO
AT5G57050	0.815609	6.20472	1.42752e-07	1.65794e-05	UP	no	NO
AT1G80080	-0.700183	4.70659	1.43676e-07	1.66171e-05	DOWN	no	NO
AT3G57940	0.827256	3.57891	1.44064e-07	1.66171e-05	UP	no	NO
AT2G36895	-0.526189	5.52397	1.54605e-07	1.77722e-05	DOWN	no	NO
AT4G31180	0.478353	6.79999	1.64796e-07	1.88793e-05	UP	no	NO
AT3G19840	0.533307	4.67414	1.71244e-07	1.95515e-05	UP	yes	NO
AT5G60680	0.72991	7.29275	1.7216e-07	1.95896e-05	UP	no	NO
AT2G38470	1.11882	5.82286	1.74978e-07	1.98433e-05	UP	no	NO
AT5G49480	-1.19928	4.67954	1.76699e-07	1.99711e-05	DOWN	no	NO
AT3G47420	-0.90753	6.19775	1.91315e-07	2.15508e-05	DOWN	no	NO
AT2G33050	-0.984306	2.77592	1.94661e-07	2.18546e-05	DOWN	no	NO
AT1G75770	0.840655	3.32915	1.9575e-07	2.19039e-05	UP	no	NO
AT5G14940	-0.957359	2.79105	1.97757e-07	2.20552e-05	DOWN	no	NO
AT5G61900	0.911338	3.64755	2.11512e-07	2.35114e-05	UP	no	NO
AT3G20370	-1.34427	4.92567	2.2319e-07	2.46794e-05	DOWN	no	NO
AT1G05330	2.23947	-1.18596	2.23485e-07	2.46794e-05	UP	no	NO
AT2G15490	-1.4125	2.35201	2.30193e-07	2.53371e-05	DOWN	no	NO
AT1G19720	-0.527439	6.35946	2.32108e-07	2.54646e-05	DOWN	no	NO
AT5G15700	0.717661	3.59443	2.44805e-07	2.67703e-05	UP	no	NO
AT1G59860	2.07358	0.87295	2.45856e-07	2.67983e-05	UP	no	NO
AT2G18100	1.14334	2.27135	2.63843e-07	2.86661e-05	UP	no	NO
AT3G61870	-0.514408	7.3346	2.67994e-07	2.89857e-05	DOWN	no	NO
AT1G04240	0.72686	5.34408	2.68505e-07	2.89857e-05	UP	no	NO
AT3G10720	0.63207	6.53955	2.69809e-07	2.90333e-05	UP	no	NO
AT3G26290	-0.635018	6.83308	2.73526e-07	2.93396e-05	DOWN	no	NO
AT1G32490	0.486731	6.05857	2.83241e-07	3.02852e-05	UP	yes	YES	1:11747258:C-T;intronic_variant
AT3G47540	-0.985044	2.43988	2.85926e-07	3.04756e-05	DOWN	no	NO
AT4G10925	0.616206	4.33293	2.90248e-07	3.08386e-05	UP	no	NO
AT1G07985	1.47621	4.02537	2.96442e-07	3.13977e-05	UP	no	NO
AT5G59540	-0.541498	6.85714	3.08826e-07	3.26068e-05	DOWN	no	NO
AT2G05840	0.499478	6.06853	3.12656e-07	3.2908e-05	UP	no	NO
AT4G23430	-0.615407	5.42288	3.14033e-07	3.295e-05	DOWN	no	NO
AT2G39855	1.34088	0.951974	3.5772e-07	3.74173e-05	UP	no	NO
AT5G02020	0.836854	7.68855	3.60991e-07	3.76425e-05	UP	no	NO
AT2G27020	0.479952	6.23505	3.79795e-07	3.94811e-05	UP	no	NO
AT3G23540	0.493327	5.53622	3.8871e-07	4.02835e-05	UP	no	NO
AT3G16840	0.495399	5.18235	3.90577e-07	4.03528e-05	UP	no	NO
AT4G34920	-0.500356	6.07836	3.95212e-07	4.06707e-05	DOWN	no	NO
AT3G53230	0.925514	4.35711	3.96068e-07	4.06707e-05	UP	no	NO
AT4G14340	0.556368	5.15922	4.02086e-07	4.11631e-05	UP	no	NO
AT4G10060	0.532772	6.99693	4.18409e-07	4.27043e-05	UP	no	NO
AT1G67910	0.807041	4.04539	4.2185e-07	4.29255e-05	UP	no	NO
AT4G32590	-0.510049	5.59981	4.32569e-07	4.38836e-05	DOWN	no	NO
AT1G62780	0.598179	6.61519	4.41597e-07	4.4665e-05	UP	no	NO
AT5G65080	1.75421	0.627439	4.61636e-07	4.6552e-05	UP	no	NO
AT5G16890	0.624358	3.87285	4.64632e-07	4.67142e-05	UP	no	NO
AT3G50430	0.606648	3.91439	4.66168e-07	4.67292e-05	UP	no	YES	3:18715661:G-GT;intronic_variant,3:18715661:G-GT;splice_donor_variant
AT1G03580	1.05804	2.61066	4.75262e-07	4.74994e-05	UP	no	NO
AT5G18440	0.654418	3.84149	4.9533e-07	4.93181e-05	UP	no	NO
AT5G11200	0.505862	7.02527	4.96387e-07	4.93181e-05	UP	yes	NO
AT2G18410	0.641485	3.64116	5.01756e-07	4.96756e-05	UP	no	NO
AT3G52140	0.526397	6.71128	5.02935e-07	4.96756e-05	UP	no	NO
AT1G20920	-0.55761	5.97854	5.09164e-07	5.01437e-05	DOWN	no	NO
AT4G01070	-0.791322	5.03278	5.25686e-07	5.16199e-05	DOWN	no	NO
AT3G16450	-0.809312	7.61811	5.28585e-07	5.17537e-05	DOWN	no	NO
AT5G43930	0.509118	5.10575	5.35168e-07	5.21728e-05	UP	no	NO
AT2G15080	-0.993561	4.93661	5.35963e-07	5.21728e-05	DOWN	no	NO
AT1G55850	-0.834894	5.39296	5.50744e-07	5.34571e-05	DOWN	no	NO
AT2G32800	0.77859	5.05647	6.04371e-07	5.8486e-05	UP	no	NO
AT1G76690	-1.61341	2.60551	6.06028e-07	5.8486e-05	DOWN	no	NO
AT3G44450	-1.67249	1.79812	6.1026e-07	5.87262e-05	DOWN	no	NO
AT5G17280	0.659957	3.78846	6.14881e-07	5.90023e-05	UP	no	NO
AT1G23710	0.74819	4.24854	6.22915e-07	5.96034e-05	UP	no	NO
AT2G18860	0.653832	4.31537	6.34522e-07	6.0542e-05	UP	no	NO
AT3G04810	0.596556	5.83257	6.43408e-07	6.12165e-05	UP	no	NO
AT2G24820	-0.495788	7.06098	6.57516e-07	6.23286e-05	DOWN	no	NO
AT1G77210	0.781818	5.10872	6.58798e-07	6.23286e-05	UP	no	NO
AT1G02660	1.16193	5.3223	6.76508e-07	6.38248e-05	UP	no	NO
AT1G21580	-0.53267	6.43078	7.21382e-07	6.78683e-05	DOWN	no	NO
AT5G51810	0.949315	2.14276	7.26155e-07	6.80535e-05	UP	no	NO
AT1G06590	0.608051	3.9263	7.27391e-07	6.80535e-05	UP	no	NO
AT3G50800	1.50076	2.34944	7.48469e-07	6.98315e-05	UP	no	NO
AT4G19690	4.07187	-0.126594	7.78964e-07	7.24759e-05	UP	no	NO
AT5G13830	1.38064	0.426132	7.92585e-07	7.35401e-05	UP	no	NO
AT1G16540	0.540906	4.35835	8.16476e-07	7.55487e-05	UP	no	NO
AT5G61160	-7.69388	-0.0187811	8.56642e-07	7.89579e-05	DOWN	no	NO
AT5G58510	0.496875	5.27938	8.59363e-07	7.89579e-05	UP	no	NO
AT3G44990	-0.648955	6.65429	8.60353e-07	7.89579e-05	DOWN	no	NO
AT4G34131	-1.05649	2.89365	8.70656e-07	7.96818e-05	DOWN	no	NO
AT5G06290	-0.437602	7.51254	8.72972e-07	7.96818e-05	DOWN	no	NO
AT5G50340	0.561481	4.90389	8.78942e-07	8.00098e-05	UP	no	NO
AT4G38240	0.559167	5.54914	9.04875e-07	8.21485e-05	UP	no	NO
AT3G12340	0.783921	3.08392	9.10477e-07	8.24349e-05	UP	no	NO
AT4G36220	-0.649646	6.61539	9.22167e-07	8.32694e-05	DOWN	no	NO
AT4G01670	1.08062	2.38789	9.50111e-07	8.55634e-05	UP	no	YES	4:712350:C-T;protein_coding;sense;GGG>GGA;G>G
AT1G59980	0.644674	3.5667	9.55436e-07	8.58135e-05	UP	no	NO
AT3G19670	0.476332	5.62731	9.77707e-07	8.75802e-05	UP	yes	NO
AT1G08910	0.491716	5.01703	1.02618e-06	9.16786e-05	UP	no	YES	1:2859036:A-AC;exonic_variant,1:2859036:A-AC;exonic_variant&protein_coding
AT2G14680	0.526447	5.10053	1.08031e-06	9.62595e-05	UP	no	NO
AT4G28710	0.543319	5.63427	1.08472e-06	9.63969e-05	UP	no	NO
AT5G58290	0.456426	6.73144	1.11081e-06	9.84561e-05	UP	no	NO
AT2G32320	0.552767	5.03961	1.19362e-06	0.000105518	UP	no	NO
AT3G54320	0.861462	2.92168	1.19737e-06	0.000105572	UP	no	NO
AT2G26810	0.609535	3.60302	1.21537e-06	0.00010688	UP	no	YES	2:11434437:A-C;exonic_variant,2:11434437:A-C;protein_coding;missense;GAT>GAG;D>E
AT5G04530	0.739008	5.75759	1.22303e-06	0.000107274	UP	no	NO
AT3G44205	-1.07326	1.46037	1.24106e-06	0.000108572	DOWN	no	NO
AT5G16810	0.468012	5.226	1.27236e-06	0.000111022	UP	no	NO
AT3G30380	0.608093	4.50475	1.27668e-06	0.000111111	UP	no	NO
AT1G32150	0.557698	4.53652	1.28088e-06	0.000111189	UP	no	NO
AT5G15550	0.598475	4.23219	1.2858e-06	0.000111329	UP	no	NO
AT3G20000	0.525271	5.64723	1.31619e-06	0.000113668	UP	no	NO
AT3G13800	0.559234	3.88352	1.32542e-06	0.000114172	UP	no	NO
AT5G66080	0.614913	3.61428	1.34374e-06	0.000115455	UP	no	NO
AT5G15810	0.556552	4.86948	1.35775e-06	0.000116362	UP	no	NO
AT2G19860	0.618813	5.16002	1.3913e-06	0.000118935	UP	no	NO
AT2G32160	-1.04718	2.26445	1.41138e-06	0.000120346	DOWN	no	NO
AT5G13740	0.92163	5.97341	1.4349e-06	0.000122042	UP	no	NO
AT2G14260	0.455396	6.88241	1.44267e-06	0.000122394	UP	no	NO
AT2G28400	0.93008	3.39554	1.46343e-06	0.000123844	UP	no	NO
AT2G40200	-1.58722	-0.0824458	1.46832e-06	0.000123946	DOWN	no	NO
AT3G57520	0.690667	7.29608	1.47901e-06	0.000124536	UP	no	NO
AT5G04900	-0.491823	4.86903	1.49977e-06	0.000125969	DOWN	no	NO
AT1G35612	-0.528863	5.4002	1.51116e-06	0.00012661	DOWN	no	NO
AT5G47990	-1.76293	4.01334	1.52722e-06	0.000127638	DOWN	no	NO
AT2G25000	-1.10745	2.03252	1.57457e-06	0.00013127	DOWN	no	NO
AT1G16825	0.904558	2.235	1.70928e-06	0.000142149	UP	no	YES	1:5759796:G-T;protein_coding;missense;AGT>ATT;S>I,1:5759796:G-T;splice_donor_region_variant
AT3G12810	0.48063	5.84629	1.74122e-06	0.000144449	UP	no	NO
AT4G37800	-0.526221	7.22661	1.78998e-06	0.000148129	DOWN	no	NO
AT5G06320	0.714005	5.24132	1.79828e-06	0.000148451	UP	no	NO
AT4G32030	0.516767	5.20268	1.84607e-06	0.000152023	UP	no	NO
AT4G13840	-0.532799	5.76112	1.85876e-06	0.000152553	DOWN	no	NO
AT3G47990	0.473383	5.32678	1.86411e-06	0.000152553	UP	no	NO
AT5G54075	0.95092	1.79053	1.86609e-06	0.000152553	UP	no	NO
AT4G08950	1.35002	7.62484	1.96792e-06	0.000160488	UP	no	NO
AT2G24240	0.901522	4.1388	2.06681e-06	0.000168146	UP	no	NO
AT5G56550	1.25092	5.67895	2.12847e-06	0.000172745	UP	no	NO
AT3G19030	0.776816	5.79207	2.16954e-06	0.000175654	UP	no	NO
AT5G51390	0.855561	2.95258	2.18851e-06	0.000176765	UP	no	NO
AT4G24240	0.593948	4.33348	2.25338e-06	0.000181569	UP	no	NO
AT1G70280	0.544024	5.30815	2.32092e-06	0.000186566	UP	no	NO
AT1G03610	0.689343	6.54623	2.34042e-06	0.000187685	UP	no	NO
AT3G10420	-0.560241	6.94031	2.37767e-06	0.000190219	DOWN	no	NO
AT2G01980	0.490408	4.87586	2.39247e-06	0.00019095	UP	no	NO
AT2G29490	-1.27893	3.30915	2.40399e-06	0.000191001	DOWN	no	NO
AT1G53850	0.472275	5.38167	2.40445e-06	0.000191001	UP	no	NO
AT1G25440	-0.515563	7.3783	2.45437e-06	0.000194507	DOWN	no	NO
AT2G34357	0.512552	5.16374	2.48493e-06	0.000196467	UP	no	NO
AT1G62860	0.721496	2.80793	2.58141e-06	0.000203617	UP	no	NO
AT3G24982	-4.54186	-2.71042	2.73164e-06	0.000214963	DOWN	no	YES	3:9106874:GGACAAGCTTGTCGACGGCCGGCCGCGGCCGGCCGTC-G;intronic_variant&splice_donor_region_variant&splice_acceptor_region_variant&exonic_variant&splice_acceptor_variant&protein_coding
AT3G62200	-0.590707	3.57556	2.76285e-06	0.000216913	DOWN	no	NO
ATMG00590	1.44579	1.26081	2.77877e-06	0.00021755	UP	no	NO
AT3G10190	0.761939	2.85635	2.78388e-06	0.00021755	UP	no	NO
AT2G39030	-6.56684	-0.240475	2.80183e-06	0.000218446	DOWN	no	NO
AT1G74090	-0.656173	5.37671	2.87724e-06	0.000223807	DOWN	no	NO
AT1G31173	-1.40406	4.40183	2.94125e-06	0.000228258	DOWN	no	NO
AT4G36900	0.585853	4.65957	2.95496e-06	0.000228796	UP	no	YES	4:17388763:C-CA;exonic_variant
AT5G25280	0.491128	8.36112	2.96634e-06	0.00022915	UP	no	NO
AT2G17930	-0.512501	6.64126	3.09052e-06	0.000238196	DOWN	no	NO
AT1G19670	-0.995429	4.16749	3.12004e-06	0.000239923	DOWN	no	NO
AT4G15030	0.585626	4.29177	3.20177e-06	0.000245647	UP	yes	YES	4:8579423:A-AT;intronic_variant,4:8579396:AG-A;intronic_variant,4:8579430:G-GT;intronic_variant,4:8579403:T-C;intronic_variant,4:8579450:C-CT;intronic_variant,4:8579427:G-GT;intronic_variant
AT3G29575	0.750523	5.7574	3.22872e-06	0.000247151	UP	no	NO
AT5G22390	1.27706	3.61785	3.28333e-06	0.000250538	UP	no	NO
AT5G55620	-0.58905	5.33616	3.28785e-06	0.000250538	DOWN	no	NO
AT5G60900	-2.49147	-1.69198	3.31236e-06	0.000251837	DOWN	no	NO
AT1G21000	0.617343	6.87167	3.36119e-06	0.000254974	UP	no	NO
AT5G27420	1.07669	3.23597	3.41302e-06	0.000258323	UP	no	NO
AT5G44060	-0.681582	3.22367	3.45632e-06	0.000261014	DOWN	no	YES	5:17732291:A-AT;exonic_variant
AT1G49800	-2.58488	-2.08224	3.48638e-06	0.000262695	DOWN	no	NO
AT5G47230	1.39132	3.02887	3.558e-06	0.000267493	UP	no	NO
AT3G61415	0.528032	4.23674	3.61835e-06	0.000271425	UP	no	YES	3:22723828:G-GA;splice_acceptor_region_variant
AT1G55110	0.470305	5.73836	3.6528e-06	0.0002734	UP	no	NO
AT4G38860	-0.792118	5.57528	3.83393e-06	0.000286321	DOWN	no	NO
AT1G01620	0.419725	8.954	3.86772e-06	0.000288205	UP	no	NO
AT5G50950	0.931867	5.89797	3.87801e-06	0.000288334	UP	no	NO
AT4G23600	-0.740327	4.62577	3.95107e-06	0.000293119	DOWN	no	NO
AT3G16720	1.06407	3.65448	3.9793e-06	0.000294152	UP	no	NO
AT4G32910	0.460851	5.41067	3.98247e-06	0.000294152	UP	no	NO
AT5G18630	0.544566	6.66035	3.99486e-06	0.000294422	UP	no	NO
AT3G45140	-1.54887	5.63064	4.03348e-06	0.000296465	DOWN	no	YES	3:16526430:C-T;exonic_variant,3:16526430:C-T;protein_coding;missense;ACC>ATC;T>I
AT1G73990	-0.471227	5.68561	4.04328e-06	0.000296465	DOWN	no	NO
AT2G01480	0.536691	4.58793	4.04898e-06	0.000296465	UP	no	NO
AT5G48000	-1.57568	4.00094	4.13065e-06	0.000301788	DOWN	no	NO
AT2G21210	-1.0278	5.2208	4.18855e-06	0.000305356	DOWN	no	NO
AT4G05070	0.645669	7.46945	4.26072e-06	0.000309946	UP	no	NO
AT5G01760	1.08487	1.33461	4.27443e-06	0.000310274	UP	no	NO
AT5G48300	-0.478159	7.79772	4.30717e-06	0.000311978	DOWN	no	NO
AT3G09260	-0.931734	10.0606	4.3282e-06	0.000312184	DOWN	no	NO
AT1G75280	-1.10356	6.00573	4.32855e-06	0.000312184	DOWN	no	NO
AT4G19040	0.467941	5.64677	4.57721e-06	0.000329412	UP	no	YES	4:10434198:G-A;intronic_variant
AT5G13960	0.585981	3.86356	4.60637e-06	0.000330804	UP	no	NO
AT1G78080	0.433519	7.60944	4.62578e-06	0.000331491	UP	no	NO
AT5G54470	-1.13346	2.32682	4.70833e-06	0.000336691	DOWN	no	YES	5:22114955:C-T;protein_coding;missense;GTG>ATG;V>M
AT5G11670	-0.695998	7.08495	4.72549e-06	0.000337202	DOWN	no	NO
AT3G44260	1.13864	4.27978	4.76007e-06	0.000338951	UP	no	NO
AT5G45820	-0.552685	5.8844	4.80669e-06	0.000341549	DOWN	no	NO
AT3G28930	-1.45929	2.27337	4.92796e-06	0.000349428	DOWN	no	NO
AT5G22100	0.678843	3.1699	5.14567e-06	0.000364099	UP	no	NO
AT1G79820	0.631784	4.01239	5.1762e-06	0.000365492	UP	no	NO
AT3G59940	0.638828	8.27728	5.2312e-06	0.000368603	UP	no	NO
AT4G22240	-0.506241	7.91041	5.40768e-06	0.000380242	DOWN	no	NO
AT5G65070	1.1627	1.25924	5.52494e-06	0.000386953	UP	no	NO
AT3G45210	-0.790321	4.05249	5.5261e-06	0.000386953	DOWN	no	NO
AT5G61440	0.894969	2.79776	5.54245e-06	0.000387293	UP	no	NO
AT3G45430	-1.23379	0.36808	5.57293e-06	0.000388617	DOWN	no	NO
AT3G16850	0.471546	6.54527	5.62202e-06	0.00039123	UP	no	NO
AT5G54260	0.610313	3.66896	5.73548e-06	0.000398302	UP	no	NO
AT2G11000	0.453998	4.99917	5.88552e-06	0.000407209	UP	no	NO
AT3G46610	-0.493191	4.77187	5.88791e-06	0.000407209	DOWN	no	NO
AT4G16146	0.76876	4.43778	5.93929e-06	0.000409487	UP	no	YES	4:9143793:TA-T;intronic_variant,4:9143741:T-TA;intronic_variant
AT1G34060	-1.52339	1.80858	5.94517e-06	0.000409487	DOWN	no	NO
AT1G74930	2.59712	3.01074	6.04e-06	0.00041517	UP	no	NO
AT1G15520	-7.01284	0.627225	6.06974e-06	0.000416365	DOWN	no	NO
AT5G35777	1.76743	4.34975	6.21085e-06	0.000425178	UP	no	NO
AT5G63450	1.3006	4.67584	6.22859e-06	0.000425401	UP	no	NO
AT4G15800	0.566769	4.69771	6.23936e-06	0.000425401	UP	no	YES	4:8985692:TG-T;exonic_variant,4:8985631:AT-A;exonic_variant,4:8985599:TTG-T;exonic_variant,4:8985758:TG-T;exonic_variant,4:8985638:CG-C;exonic_variant,4:8985806:GT-G;exonic_variant,4:8985723:AT-A;exonic_variant
AT3G21090	0.705859	5.12228	6.27825e-06	0.000427188	UP	no	NO
AT1G67105	1.17753	4.68818	6.30232e-06	0.00042796	UP	no	YES	1:25058254:G-GA;exonic_variant
AT5G37370	0.44373	6.45432	6.31982e-06	0.000428286	UP	yes	NO
AT3G16750	0.520642	4.27007	6.418e-06	0.000434065	UP	no	NO
AT4G14800	0.444049	4.88767	6.61043e-06	0.000446184	UP	no	NO
AT4G23200	-2.15549	-1.34303	6.63657e-06	0.000447052	DOWN	no	NO
AT1G63360	-0.487979	4.90614	6.67889e-06	0.000449006	DOWN	no	NO
AT3G47620	0.547911	6.83656	6.77731e-06	0.000454714	UP	no	NO
AT1G08800	-0.488886	4.80882	6.85562e-06	0.000459054	DOWN	no	YES	1:2812857:C-CT;exonic_variant
AT3G25820	-1.25002	5.27883	6.91633e-06	0.0004622	DOWN	no	NO
AT4G23990	-0.679945	3.55528	7.01841e-06	0.000468093	DOWN	no	NO
AT2G42870	0.851616	4.89226	7.05255e-06	0.000469441	UP	no	NO
AT4G11280	1.53777	4.45819	7.06883e-06	0.000469596	UP	no	NO
AT2G46750	-1.40201	3.31231	7.36586e-06	0.000488138	DOWN	no	NO
AT2G44940	-1.05518	3.23263	7.3883e-06	0.000488138	DOWN	no	NO
AT2G03760	0.632807	4.58711	7.39142e-06	0.000488138	UP	no	NO
AT5G26280	-0.792789	5.76684	7.45795e-06	0.000491233	DOWN	no	NO
AT1G66200	-0.554726	7.86009	7.46745e-06	0.000491233	DOWN	no	YES	1:24656032:C-T;protein_coding;stop-gain;TGG>TGA;W>*
AT3G04030	-0.999191	2.22023	7.50045e-06	0.000492284	DOWN	no	NO
AT5G36940	-0.468283	4.76745	7.51267e-06	0.000492284	DOWN	no	NO
AT4G30825	-0.45691	4.65965	7.59936e-06	0.000496998	DOWN	no	YES	4:15011036:G-A;protein_coding;missense;GGT>AGT;G>S
AT1G21720	0.420469	5.80832	7.74215e-06	0.00050521	UP	no	NO
AT1G26380	-5.25037	0.107452	7.75493e-06	0.00050521	DOWN	no	NO
AT3G61150	0.52021	4.80843	7.93403e-06	0.000515881	UP	no	NO
AT3G41762	3.22684	-2.24208	7.95746e-06	0.000516407	UP	no	YES	3:14195675:G-A;exonic_variant,3:14196330:T-TG;intronic_variant,3:14196560:A-G;exonic_variant,3:14195685:T-A;exonic_variant,3:14195873:T-TG;exonic_variant&protein_coding
AT1G09710	0.697364	3.49497	8.02411e-06	0.000519731	UP	no	NO
AT4G16700	0.958493	1.36647	8.04583e-06	0.000520137	UP	no	NO
AT1G06720	0.564804	4.49365	8.12551e-06	0.000524228	UP	no	NO
AT5G37380	0.501801	4.23724	8.14024e-06	0.000524228	UP	no	NO
AT1G22640	0.661347	6.68581	8.19061e-06	0.000526312	UP	no	NO
AT2G18950	-0.527066	4.49784	8.20385e-06	0.000526312	DOWN	no	NO
AT4G08110	0.446286	5.05343	8.32354e-06	0.000532876	UP	no	NO
AT4G01860	0.475221	4.77913	8.33781e-06	0.000532876	UP	no	NO
AT5G44430	-8.36597	-2.02118	8.36575e-06	0.000533649	DOWN	no	NO
AT2G47760	0.519811	4.27995	8.49623e-06	0.000540948	UP	no	NO
AT1G21050	-0.618123	3.98294	8.51698e-06	0.000541246	DOWN	no	NO
AT1G20070	-0.903144	2.28871	8.56036e-06	0.000542978	DOWN	no	NO
AT3G01660	-0.700967	3.22183	8.77803e-06	0.000555739	DOWN	no	NO
AT1G79770	-0.862804	2.36538	8.88184e-06	0.000560936	DOWN	no	NO
AT1G76680	-1.98896	5.16469	8.89344e-06	0.000560936	DOWN	no	NO
AT4G01975	-4.41036	-2.01449	9.04475e-06	0.000569413	DOWN	no	NO
AT5G46710	0.860548	3.84094	9.08266e-06	0.000570734	UP	no	NO
AT1G22490	1.10373	1.35973	9.15784e-06	0.000574386	UP	no	NO
AT1G79529	1.42955	2.49686	9.43188e-06	0.000590474	UP	no	NO
AT4G34135	-1.46573	3.20947	9.53467e-06	0.000595802	DOWN	no	NO
AT4G13800	1.10035	4.64633	9.59593e-06	0.000597675	UP	no	NO
AT3G24530	0.492594	4.17338	9.60014e-06	0.000597675	UP	no	NO
AT1G50730	0.42046	5.36113	9.82635e-06	0.000609683	UP	no	YES	1:18801893:GT-G;splice_donor_region_variant
AT4G02050	-0.521779	5.04985	9.84431e-06	0.000609683	DOWN	no	NO
AT4G28150	0.681099	2.76603	9.84731e-06	0.000609683	UP	no	NO
AT2G38560	0.434513	5.07806	9.90514e-06	0.000612138	UP	no	NO
AT5G09710	1.30777	0.243674	1.03477e-05	0.000637646	UP	no	NO
AT3G53630	0.58073	5.0738	1.03558e-05	0.000637646	UP	no	NO
AT1G68190	0.507389	6.46978	1.03892e-05	0.000638536	UP	no	NO
AT1G66280	-2.14489	4.99109	1.0762e-05	0.000660245	DOWN	no	NO
AT4G13920	-1.65451	1.0237	1.0907e-05	0.000667923	DOWN	no	NO
AT1G26390	-8.09338	-2.09946	1.12155e-05	0.000685571	DOWN	no	NO
AT1G12470	0.421964	5.62737	1.12606e-05	0.000687078	UP	no	NO
AT5G55840	-0.711036	2.91294	1.14427e-05	0.000696928	DOWN	no	NO
AT1G71400	-1.09893	1.68953	1.15359e-05	0.000701337	DOWN	no	NO
AT5G38040	-0.926025	1.66231	1.15918e-05	0.000703465	DOWN	no	NO
AT4G02380	0.964929	8.69176	1.16828e-05	0.000707711	UP	no	NO
AT1G68935	-1.02409	1.52923	1.21384e-05	0.00073399	DOWN	no	NO
AT2G26350	0.458671	4.29393	1.23454e-05	0.000745168	UP	no	NO
AT2G17230	1.44597	5.68339	1.24421e-05	0.000749543	UP	no	NO
AT1G64780	-1.02652	4.4398	1.24623e-05	0.000749543	DOWN	no	NO
AT4G27540	0.616432	3.46286	1.25026e-05	0.000750624	UP	no	NO
AT4G13493	0.737987	3.92528	1.28212e-05	0.000768382	UP	no	NO
AT3G21270	0.679244	4.14248	1.29884e-05	0.000777022	UP	no	YES	3:7475447:G-A;protein_coding;missense;GAT>AAT;D>N
AT1G51460	0.683692	3.37746	1.31049e-05	0.0007826	UP	no	NO
AT5G58980	-0.79018	3.51223	1.34084e-05	0.000799304	DOWN	no	NO
AT2G31060	0.497548	4.84777	1.34512e-05	0.00080044	UP	no	NO
AT3G57530	0.489329	5.97201	1.35981e-05	0.000807756	UP	no	NO
AT5G16120	0.420099	6.20925	1.37693e-05	0.000816486	UP	no	NO
AT2G01520	-1.62035	5.66759	1.39601e-05	0.000826342	DOWN	no	NO
AT4G02130	0.677998	4.61393	1.40223e-05	0.000828573	UP	no	NO
AT2G15090	0.548545	6.7889	1.41255e-05	0.000833209	UP	no	NO
AT5G51150	0.419849	5.61907	1.42749e-05	0.000840544	UP	no	NO
AT3G63400	0.428522	5.44973	1.43825e-05	0.000845403	UP	yes	NO
AT2G39870	0.54705	5.32364	1.47019e-05	0.000862675	UP	no	NO
AT2G46600	0.866524	5.66587	1.47541e-05	0.000864231	UP	no	NO
AT5G20220	0.6017	5.02078	1.49105e-05	0.000871879	UP	no	NO
AT1G31120	-0.594597	4.38932	1.49752e-05	0.00087414	DOWN	no	NO
AT1G67970	0.906222	2.56413	1.50261e-05	0.000875595	UP	no	NO
AT4G01250	0.942035	3.16172	1.5274e-05	0.000888501	UP	no	NO
AT3G24010	0.478236	4.42099	1.55204e-05	0.000901278	UP	no	NO
AT5G44420	-9.47267	-0.828995	1.55573e-05	0.000901868	DOWN	no	NO
AT3G01500	-0.487488	10.9471	1.55937e-05	0.000901979	DOWN	no	NO
AT2G41640	0.471877	5.32287	1.56188e-05	0.000901979	UP	no	NO
AT5G43700	0.497801	6.80404	1.56396e-05	0.000901979	UP	no	NO
AT5G43190	0.678271	4.42304	1.58186e-05	0.000910743	UP	no	NO
AT5G52780	-0.544053	4.74124	1.59289e-05	0.000915531	DOWN	no	NO
AT5G20910	0.613752	3.47838	1.66834e-05	0.000957261	UP	no	NO
AT1G49750	-0.630296	5.83503	1.68125e-05	0.000963028	DOWN	no	NO
AT1G73630	-0.974452	2.34331	1.68477e-05	0.000963406	DOWN	no	NO
AT1G08730	1.25265	1.00991	1.68855e-05	0.000963932	UP	no	NO
AT3G14290	0.410433	5.6154	1.69309e-05	0.000964879	UP	no	NO
AT3G01600	1.28223	0.807288	1.69752e-05	0.000964879	UP	no	NO
AT2G46080	-0.43891	5.04408	1.69981e-05	0.000964879	DOWN	no	NO
AT5G18770	0.554269	3.81498	1.70167e-05	0.000964879	UP	no	NO
AT5G52250	0.733422	3.99273	1.74643e-05	0.000988595	UP	no	NO
AT5G27990	0.482124	4.28625	1.76157e-05	0.000995494	UP	no	NO
AT1G79680	-4.67397	-1.42341	1.78878e-05	0.00100918	DOWN	no	NO
AT4G14720	0.516625	4.45217	1.80573e-05	0.00101703	UP	no	NO
AT5G04950	-0.557558	5.13214	1.85319e-05	0.00104202	DOWN	no	NO
AT1G05560	-0.981805	5.02626	1.85779e-05	0.00104287	DOWN	no	NO
AT4G38540	-0.856808	4.24163	1.89098e-05	0.00105973	DOWN	no	NO
AT5G24890	0.563355	6.48898	1.91168e-05	0.00106955	UP	no	NO
AT4G21840	-4.82789	-1.45517	1.94138e-05	0.00108437	DOWN	no	NO
AT3G62070	1.05608	3.26434	1.9575e-05	0.00109157	UP	no	NO
AT4G38630	0.392653	6.22495	1.96297e-05	0.00109281	UP	no	NO
AT5G48010	-1.67434	4.08543	1.99642e-05	0.00110959	DOWN	no	NO
AT1G63640	0.450515	5.04064	2.03312e-05	0.00112813	UP	no	YES	1:23592983:C-T;intronic_variant
AT4G30760	0.390824	5.67363	2.05803e-05	0.00114008	UP	no	NO
AT5G34871	1.17956	0.0497371	2.06439e-05	0.00114172	UP	no	NO
AT1G15200	0.415063	6.20916	2.07975e-05	0.00114833	UP	no	NO
AT3G14120	0.477209	4.7673	2.08328e-05	0.00114839	UP	no	NO
AT5G22920	0.957889	6.94957	2.09381e-05	0.00115232	UP	no	NO
AT5G44510	-0.42894	5.62577	2.11525e-05	0.00116221	DOWN	no	NO
AT1G02860	0.504178	4.61848	2.13102e-05	0.00116897	UP	no	NO
AT1G09240	-2.2292	3.88886	2.13766e-05	0.00117071	DOWN	no	NO
AT2G39940	0.405234	5.56542	2.18346e-05	0.00119287	UP	no	NO
AT5G38020	-1.58794	2.48425	2.18522e-05	0.00119287	DOWN	no	NO
AT1G71130	-0.58987	3.85342	2.19149e-05	0.00119436	DOWN	no	NO
AT3G51530	0.556909	3.38183	2.20067e-05	0.00119684	UP	no	NO
AT1G05340	0.779973	4.95115	2.20315e-05	0.00119684	UP	no	NO
AT3G50330	1.53391	2.03541	2.22443e-05	0.00120646	UP	no	NO
AT2G01020	0.800498	3.66006	2.23576e-05	0.00121065	UP	no	NO
AT2G25450	-0.404987	9.47884	2.2553e-05	0.00121927	DOWN	no	NO
AT2G24850	-7.104	0.302478	2.32304e-05	0.00125388	DOWN	no	NO
AT3G10940	-0.517864	4.86332	2.33058e-05	0.00125401	DOWN	no	NO
AT2G20250	0.607659	3.60772	2.33072e-05	0.00125401	UP	no	NO
AT4G21100	0.446737	4.91919	2.34172e-05	0.00125792	UP	no	NO
AT1G08650	-1.19619	4.70162	2.37336e-05	0.00127288	DOWN	no	NO
AT2G32930	0.699127	2.97219	2.38309e-05	0.00127434	UP	no	NO
AT3G22630	0.441938	4.82761	2.38363e-05	0.00127434	UP	no	NO
AT4G30470	0.633926	5.20889	2.41741e-05	0.00129034	UP	no	NO
AT3G05880	0.544207	7.12948	2.435e-05	0.00129768	UP	no	NO
AT5G22290	0.647914	4.67802	2.4397e-05	0.00129813	UP	no	NO
AT5G42400	-0.473332	4.75029	2.45638e-05	0.00130475	DOWN	no	NO
AT1G12460	0.502259	4.20359	2.4599e-05	0.00130475	UP	no	NO
AT4G13770	-1.18577	6.66494	2.52837e-05	0.00133896	DOWN	no	NO
AT4G18150	2.7013	-1.57618	2.54484e-05	0.00134557	UP	no	NO
AT1G03410	-0.564004	4.03558	2.55219e-05	0.00134734	DOWN	no	NO
AT5G66140	0.417108	5.06019	2.55778e-05	0.00134818	UP	no	NO
AT4G15420	0.438806	4.35517	2.5826e-05	0.00135913	UP	no	NO
AT2G31970	0.385464	5.53599	2.60416e-05	0.00136834	UP	no	NO
AT1G02920	-2.58841	3.89199	2.63667e-05	0.00138327	DOWN	no	NO
AT1G33055	0.886124	4.04668	2.64302e-05	0.00138444	UP	no	NO
AT4G02715	-0.429473	6.85999	2.66772e-05	0.00139521	DOWN	no	NO
AT5G61590	0.648485	6.42838	2.68237e-05	0.0014007	UP	no	NO
AT3G60820	0.375308	6.68507	2.6949e-05	0.00140506	UP	no	NO
AT2G36480	0.414905	4.83337	2.72199e-05	0.00141699	UP	no	NO
AT1G80800	0.890653	2.88007	2.74721e-05	0.00142792	UP	no	NO
AT3G13180	0.45062	5.29863	2.76916e-05	0.001433	UP	no	NO
AT4G16170	0.503579	4.74202	2.76972e-05	0.001433	UP	no	NO
AT5G15330	0.577861	4.00349	2.77326e-05	0.001433	UP	no	NO
AT5G22730	0.528721	3.94575	2.7776e-05	0.001433	UP	no	NO
AT4G14970	0.696122	2.76266	2.77828e-05	0.001433	UP	no	YES	4:8559300:T-TG;splice_acceptor_region_variant
AT1G16410	-1.73852	5.52525	2.84357e-05	0.00146444	DOWN	no	NO
AT4G02070	0.468444	4.16765	2.92604e-05	0.00150461	UP	no	NO
AT2G17250	0.52536	4.00343	2.93719e-05	0.00150804	UP	no	YES	2:7499969:G-A;intronic_variant
AT2G25900	0.653092	7.70065	3.01946e-05	0.00154585	UP	no	NO
AT1G25380	0.449556	4.69294	3.02e-05	0.00154585	UP	no	NO
AT1G74020	-0.677113	4.10638	3.03346e-05	0.00155038	DOWN	no	NO
AT3G56880	0.605017	5.58607	3.05316e-05	0.00155808	UP	no	NO
AT5G45060	-0.429675	5.02652	3.10827e-05	0.00158381	DOWN	no	NO
AT1G07135	1.63984	2.95798	3.12443e-05	0.00158964	UP	no	NO
AT3G15450	0.89056	9.68778	3.13356e-05	0.00159188	UP	no	NO
AT2G32830	-1.71927	-0.000515713	3.15076e-05	0.00159821	DOWN	no	NO
AT5G24160	-0.801261	5.09937	3.30012e-05	0.00167145	DOWN	no	NO
AT1G11720	-0.432336	6.34978	3.35801e-05	0.00169821	DOWN	no	NO
AT1G21910	1.02361	5.01779	3.36471e-05	0.00169905	UP	no	NO
AT1G71280	2.01287	-1.48558	3.37645e-05	0.0017013	UP	no	NO
AT5G13180	-0.606965	7.13022	3.37927e-05	0.0017013	DOWN	no	NO
AT3G07770	0.469439	5.62557	3.4061e-05	0.00171225	UP	no	NO
AT2G24640	0.486989	4.04583	3.41143e-05	0.00171237	UP	no	NO
AT1G80480	0.394084	5.6442	3.45451e-05	0.00172908	UP	no	NO
AT5G20120	0.440738	4.59421	3.45497e-05	0.00172908	UP	no	NO
AT3G20660	0.599181	3.92657	3.48528e-05	0.00174166	UP	no	NO
AT2G40960	0.537592	4.81525	3.49357e-05	0.00174166	UP	no	NO
AT4G29410	0.460799	5.88752	3.49562e-05	0.00174166	UP	no	NO
AT3G57800	0.420722	5.40091	3.52612e-05	0.00175426	UP	no	NO
AT5G04370	0.885669	3.52054	3.53714e-05	0.00175714	UP	no	NO
AT2G26150	1.32523	2.07247	3.57917e-05	0.00177317	UP	no	NO
AT5G57565	0.437372	4.47974	3.57994e-05	0.00177317	UP	no	NO
AT5G23540	0.386024	6.03123	3.59978e-05	0.00178039	UP	no	NO
AT5G04540	0.439028	5.25911	3.61731e-05	0.00178643	UP	no	NO
AT1G21060	0.459397	5.39662	3.69821e-05	0.00182371	UP	no	NO
AT4G29780	1.4069	3.45644	3.71754e-05	0.00183056	UP	no	NO
AT1G73110	0.425319	5.52486	3.75282e-05	0.0018431	UP	no	NO
AT1G64360	-1.61015	2.00938	3.75395e-05	0.0018431	DOWN	no	NO
AT1G77140	0.444081	4.68125	3.78591e-05	0.00185609	UP	no	NO
AT2G35960	-0.655065	3.44237	3.82689e-05	0.00187345	DOWN	no	NO
AT1G18010	-1.68164	0.887357	3.87074e-05	0.00189142	DOWN	no	NO
AT2G02950	0.485566	5.02312	3.87482e-05	0.00189142	UP	no	NO
AT1G15125	-2.91259	2.42514	3.88288e-05	0.00189261	DOWN	no	YES	1:5205941:G-T;exonic_variant
AT2G38940	-1.71249	4.11498	3.96399e-05	0.00192935	DOWN	no	NO
AT2G26511	-0.937444	1.04418	3.97072e-05	0.00192984	DOWN	no	NO
AT1G52780	-0.48449	4.40746	4.02426e-05	0.00195304	DOWN	no	NO
AT1G07620	-1.52358	-0.102682	4.03521e-05	0.00195554	DOWN	no	NO
AT1G76960	-1.03009	3.59767	4.07538e-05	0.00197217	DOWN	no	NO
AT5G18190	0.384271	6.38682	4.08507e-05	0.00197402	UP	no	NO
AT3G16810	0.585841	3.94244	4.11746e-05	0.00198503	UP	no	NO
AT5G60450	0.395269	5.42486	4.12274e-05	0.00198503	UP	no	NO
AT1G28330	0.667551	7.84893	4.12554e-05	0.00198503	UP	no	NO
AT2G32150	0.493297	7.86547	4.17109e-05	0.00200409	UP	no	NO
AT2G31230	-1.05195	2.25566	4.24315e-05	0.0020358	DOWN	no	NO
AT2G29165	-1.09159	-0.170422	4.27213e-05	0.00204679	DOWN	no	NO
AT5G62020	0.695165	4.71419	4.30086e-05	0.00205763	UP	no	NO
AT3G63088	1.1905	0.164403	4.36108e-05	0.00208348	UP	no	NO
AT1G76930	-0.778777	7.45003	4.39565e-05	0.00209702	DOWN	no	YES	1:28896455:A-G;protein_coding;sense;TCT>TCC;S>S
AT5G20170	0.423822	4.43827	4.46501e-05	0.00212312	UP	no	NO
AT3G03620	2.0684	-1.23841	4.47215e-05	0.00212312	UP	no	NO
AT4G26850	-0.556744	8.49009	4.47513e-05	0.00212312	DOWN	no	NO
AT3G50740	-0.661176	5.48396	4.47556e-05	0.00212312	DOWN	no	NO
AT5G11800	0.536042	4.54332	4.50246e-05	0.00213049	UP	no	NO
AT3G63140	-0.384523	8.45722	4.50376e-05	0.00213049	DOWN	no	NO
AT1G21110	-1.16687	1.95687	4.52124e-05	0.00213576	DOWN	no	NO
AT3G02560	0.421712	6.80981	4.62961e-05	0.00218389	UP	no	NO
AT3G45630	0.367615	5.9678	4.64878e-05	0.00218721	UP	no	NO
AT5G44870	-0.419694	4.51539	4.64982e-05	0.00218721	DOWN	no	NO
AT3G21755	-0.84337	3.33311	4.65613e-05	0.00218721	DOWN	no	NO
AT2G41090	-0.941829	5.24523	4.67709e-05	0.00219233	DOWN	no	NO
AT3G26830	-5.88477	0.884826	4.68004e-05	0.00219233	DOWN	no	NO
AT1G69550	-0.401115	4.93476	4.7015e-05	0.00219932	DOWN	no	NO
AT2G26010	-9.5835	-0.832841	4.72533e-05	0.0022074	DOWN	no	NO
AT2G31830	1.00132	1.13211	4.73398e-05	0.00220838	UP	no	NO
AT5G20200	0.410561	5.05009	4.74821e-05	0.00221196	UP	no	NO
AT2G24520	0.403819	5.06578	4.84225e-05	0.00225265	UP	no	YES	2:10415240:CG-C;exonic_variant,2:10418201:C-CCT;splice_acceptor_region_variant,2:10415240:CG-C;exonic_variant&protein_coding
AT3G46230	2.40741	0.814232	4.89153e-05	0.00227062	UP	no	NO
AT1G52080	-0.602087	3.11816	4.89436e-05	0.00227062	DOWN	no	NO
AT4G37990	-3.0767	-0.625244	4.96031e-05	0.00229805	DOWN	no	NO
AT3G15536	-4.22735	-3.22868	4.98611e-05	0.00230683	DOWN	no	NO
AT4G19880	-0.665171	5.41395	5.00406e-05	0.00231196	DOWN	no	NO
AT5G61490	1.79221	-1.58516	5.01529e-05	0.00231397	UP	no	NO
AT2G31040	-0.386791	6.73022	5.10292e-05	0.00235118	DOWN	no	NO
AT2G43190	0.634402	2.98405	5.12732e-05	0.0023592	UP	no	NO
AT2G32880	0.444017	6.63436	5.13781e-05	0.0023608	UP	no	NO
AT3G49620	-3.78041	0.888657	5.1455e-05	0.00236111	DOWN	no	NO
AT1G10490	0.515493	4.36186	5.20313e-05	0.00238431	UP	no	NO
AT1G21130	0.548582	7.84695	5.22075e-05	0.00238913	UP	no	NO
AT1G36180	0.484134	4.03955	5.38135e-05	0.00245928	UP	no	NO
AT3G02880	0.463643	4.9816	5.41385e-05	0.00246877	UP	no	NO
AT3G21040	-2.38574	-2.6111	5.41677e-05	0.00246877	DOWN	no	NO
AT3G05640	0.584645	5.74413	5.47887e-05	0.0024937	UP	no	NO
AT1G05100	1.33163	0.80469	5.48886e-05	0.00249488	UP	no	NO
AT5G04760	0.48174	4.8841	5.49743e-05	0.00249541	UP	no	NO
AT1G70290	0.667465	8.22876	5.53437e-05	0.00250879	UP	no	NO
AT3G09270	-0.905655	3.83949	5.64121e-05	0.00255128	DOWN	no	YES	3:2849685:A-C;exonic_variant
AT4G15550	-0.575857	6.41712	5.64479e-05	0.00255128	DOWN	no	NO
AT3G15010	0.413113	6.00207	5.65083e-05	0.00255128	UP	no	NO
AT1G68670	0.503204	6.73149	5.67781e-05	0.00255517	UP	no	NO
AT5G17000	-0.870624	3.75278	5.67964e-05	0.00255517	DOWN	no	NO
AT1G71000	2.74715	-0.92325	5.6845e-05	0.00255517	UP	no	NO
AT1G72760	4.70762	-1.23705	5.68979e-05	0.00255517	UP	no	NO
AT3G48330	0.432758	4.85941	5.72668e-05	0.00256831	UP	no	NO
AT2G29500	1.24966	2.47559	5.8441e-05	0.00261749	UP	no	NO
AT4G37295	1.29939	0.190111	5.86888e-05	0.0026251	UP	no	NO
AT4G27300	-0.519964	6.10545	5.94961e-05	0.00265768	DOWN	no	NO
AT5G41580	0.450351	4.096	5.96807e-05	0.00266239	UP	no	NO
AT5G60040	0.55159	3.79472	5.97759e-05	0.00266311	UP	no	NO
AT5G38880	0.412586	5.50412	6.03746e-05	0.00268623	UP	no	NO
AT4G01026	0.611371	5.22564	6.06805e-05	0.00269628	UP	no	NO
AT2G36050	0.70952	3.48233	6.09399e-05	0.00270424	UP	no	NO
AT2G01930	0.402744	5.5037	6.15872e-05	0.00272936	UP	no	NO
AT4G34000	0.562198	7.82865	6.18326e-05	0.00273518	UP	no	NO
AT5G20960	-0.589956	5.3	6.18807e-05	0.00273518	DOWN	no	NO
AT5G17310	0.529706	6.42701	6.21392e-05	0.002743	UP	no	YES	5:5696743:C-CA;exonic_variant
AT4G19390	0.700981	3.48547	6.41558e-05	0.00282831	UP	no	NO
AT2G01290	-0.618792	4.5751	6.48879e-05	0.00285357	DOWN	no	NO
AT4G22214	-5.32745	-0.465984	6.48981e-05	0.00285357	DOWN	no	YES	4:11755450:T-A;intronic_variant,4:11755315:CA-C;exonic_variant
AT5G45470	-0.496407	4.51091	6.57257e-05	0.00288323	DOWN	no	NO
AT2G01340	0.747962	3.44258	6.5744e-05	0.00288323	UP	no	NO
AT3G42820	1.40284	-0.272425	6.61198e-05	0.00289594	UP	no	NO
AT3G53460	0.482034	8.5582	6.7633e-05	0.00295837	UP	no	NO
AT3G55110	-0.71645	2.99842	6.79619e-05	0.0029689	DOWN	no	NO
AT4G29270	-1.01771	3.0337	6.844e-05	0.00298591	DOWN	no	NO
AT2G37710	-0.439357	4.91917	6.85331e-05	0.00298611	DOWN	no	NO
AT5G20400	-0.971702	2.62979	6.91239e-05	0.00300796	DOWN	no	NO
AT1G10140	0.517102	5.12846	6.98587e-05	0.00303531	UP	no	NO
AT5G05965	0.929897	4.03183	6.99325e-05	0.00303531	UP	no	NO
AT1G80810	0.457728	4.15835	7.03731e-05	0.0030505	UP	no	NO
AT1G78370	-0.823458	6.84723	7.06077e-05	0.00305302	DOWN	no	NO
AT1G24040	-0.410923	4.51202	7.06125e-05	0.00305302	DOWN	no	NO
AT2G47800	-0.52964	3.84108	7.09076e-05	0.00306184	DOWN	no	NO
AT5G34795	-1.47678	-0.567579	7.12419e-05	0.00307234	DOWN	no	NO
AT3G47500	-0.585859	6.19887	7.14746e-05	0.00307843	DOWN	no	NO
AT5G55970	0.563728	6.08959	7.19358e-05	0.00309118	UP	no	NO
AT1G10095	0.618495	2.93631	7.19541e-05	0.00309118	UP	no	NO
AT2G32230	-0.412939	6.20174	7.25285e-05	0.00311189	DOWN	no	NO
AT4G22610	-2.18744	1.40947	7.27336e-05	0.00311672	DOWN	no	NO
AT5G42580	-1.42461	2.08151	7.28376e-05	0.00311721	DOWN	no	YES	5:17024334:G-GA;intronic_variant
AT1G70940	0.432202	7.55687	7.39017e-05	0.00315606	UP	no	NO
AT1G27670	1.09442	2.65485	7.39328e-05	0.00315606	UP	no	NO
AT3G05700	0.462222	3.95337	7.44618e-05	0.00317462	UP	no	NO
AT1G64970	-0.42998	4.84119	7.52428e-05	0.00320386	DOWN	no	NO
AT5G14200	-1.19032	6.00217	7.58819e-05	0.00322699	DOWN	no	NO
AT1G03860	0.459262	5.79228	7.60727e-05	0.00323103	UP	no	NO
AT3G03880	0.520985	4.20223	7.6963e-05	0.00326473	UP	no	NO
AT5G15320	0.425057	4.59276	7.80464e-05	0.00330432	UP	no	NO
AT4G05320	-0.393839	10.5996	7.81855e-05	0.00330432	DOWN	no	NO
AT1G54740	0.551122	6.13996	7.81907e-05	0.00330432	UP	no	NO
AT3G28540	-1.23264	1.89858	7.92988e-05	0.00334694	DOWN	no	NO
AT1G56300	0.639421	4.51669	7.97817e-05	0.00336311	UP	no	NO
AT5G64250	-0.368992	5.60589	8.00313e-05	0.00336942	DOWN	no	NO
AT4G31050	-0.662412	2.9902	8.04645e-05	0.00338343	DOWN	no	NO
AT1G67250	0.422265	4.86428	8.05693e-05	0.00338361	UP	no	NO
AT2G18160	-0.475393	6.32878	8.17926e-05	0.00343071	DOWN	no	NO
AT5G10150	0.480513	4.70524	8.32265e-05	0.00348575	UP	no	NO
AT1G69070	0.480232	4.38993	8.33119e-05	0.00348575	UP	no	NO
AT3G59820	0.500057	4.30131	8.34354e-05	0.00348612	UP	no	NO
AT3G08870	-0.87205	2.08816	8.3589e-05	0.00348612	DOWN	no	NO
AT4G03320	0.757125	2.55247	8.38365e-05	0.00348612	UP	no	NO
AT3G62270	-0.707547	5.32899	8.38367e-05	0.00348612	DOWN	no	NO
AT2G15890	0.740156	8.35234	8.38383e-05	0.00348612	UP	no	NO
AT2G15830	-0.692535	3.58325	8.49694e-05	0.0035288	DOWN	no	NO
AT5G46730	-0.667655	4.18614	8.54226e-05	0.00354325	DOWN	no	NO
AT2G38220	1.89782	-0.627241	8.65283e-05	0.00358407	UP	no	NO
AT3G26450	-0.468836	6.90981	8.66194e-05	0.00358407	DOWN	no	NO
AT2G39800	0.550409	11.0455	8.73569e-05	0.00361015	UP	no	NO
AT2G01900	-1.20171	1.29909	8.787e-05	0.0036269	DOWN	no	NO
AT1G30420	-1.02972	2.72845	8.83547e-05	0.00364244	DOWN	no	NO
AT4G20110	-0.650937	3.88551	8.87637e-05	0.00365483	DOWN	no	NO
AT4G38230	0.48485	3.66485	8.88768e-05	0.00365502	UP	no	NO
AT1G16470	0.375191	5.81383	8.94661e-05	0.00367476	UP	no	NO
AT3G28920	-0.433656	4.65038	8.97611e-05	0.00368239	DOWN	no	NO
AT2G07080	1.03833	2.45862	9.03487e-05	0.00370199	UP	no	NO
AT3G14590	0.511645	4.7514	9.07477e-05	0.00371382	UP	no	NO
AT5G23820	-0.882608	5.46236	9.15178e-05	0.00374015	DOWN	no	NO
AT5G19190	0.711096	7.71256	9.16955e-05	0.00374015	UP	no	NO
AT3G52710	-0.871185	2.89892	9.17243e-05	0.00374015	DOWN	no	NO
AT5G54250	0.429055	5.32235	9.19906e-05	0.00374647	UP	no	NO
AT5G02590	-0.755775	2.46274	9.25021e-05	0.00376276	DOWN	no	NO
AT3G29370	0.807931	3.56996	9.27249e-05	0.00376727	UP	no	NO
AT4G13900	-1.02629	3.69339	9.40945e-05	0.00381831	DOWN	no	YES	4:8036782:C-A;exonic_variant
AT2G20490	0.447189	4.76825	9.43963e-05	0.00382595	UP	no	NO
AT1G52890	0.702028	5.698	9.46595e-05	0.003832	UP	no	NO
AT5G58760	0.497192	3.98585	9.53449e-05	0.00385512	UP	no	NO
AT5G08750	-0.450436	4.4216	9.59131e-05	0.00387209	DOWN	no	NO
AT2G42380	0.676281	4.70679	9.59947e-05	0.00387209	UP	no	NO
AT5G31770	5.44654	-3.15382	9.62298e-05	0.00387309	UP	no	NO
AT1G66725	-0.929197	1.74882	9.62495e-05	0.00387309	DOWN	no	NO
AT5G24830	-0.512693	3.46064	9.71114e-05	0.00390311	DOWN	no	NO
AT1G10610	0.484282	4.2572	9.73913e-05	0.0039097	UP	no	NO
AT4G25200	3.09061	-1.24619	9.83802e-05	0.0039405	UP	no	NO
AT4G31670	0.403196	4.45162	9.84114e-05	0.0039405	UP	no	YES	4:15336476:G-T;protein_coding;missense;GCT>GAT;A>D,4:15336476:G-T;exonic_variant
AT3G07650	0.950928	1.60906	9.85096e-05	0.0039405	UP	no	NO
AT1G20910	0.436021	4.11109	9.91893e-05	0.00396298	UP	no	NO
AT5G47040	0.387172	7.86229	0.000100135	0.00399604	UP	no	NO
AT3G63380	-2.31296	0.317151	0.000100323	0.00399878	DOWN	no	NO
AT2G47790	0.471783	4.29932	0.00010058	0.0040023	UP	no	NO
AT4G19090	-0.897091	1.3494	0.000100733	0.0040023	DOWN	no	NO
AT2G43650	0.481657	4.58478	0.000100767	0.0040023	UP	no	NO
AT5G54280	0.413348	6.18069	0.000101337	0.00402018	UP	no	NO
AT3G23110	-1.40326	0.694344	0.00010211	0.00404608	DOWN	no	NO
AT4G16220	-2.39576	-1.9072	0.000102511	0.00405305	DOWN	no	YES	4:9182879:C-A;protein_coding;sense;GGC>GGA;G>G,4:9182887:C-T;intronic_variant,4:9182898:C-A;protein_coding;missense;CCC>ACC;P>T,4:9182904:T-A;intronic_variant,4:9182870:C-T;intronic_variant,4:9182871:C-T;intronic_variant,4:9182916:T-A;intronic_variant,4:9182860:C-T;protein_coding;missense;GCC>GTC;A>V,4:9182871:C-T;protein_coding;missense;CCC>TCC;P>S,4:9182898:C-A;intronic_variant,4:9182886:C-A;in…
AT2G17340	0.403471	6.21424	0.000102527	0.00405305	UP	no	NO
AT3G50590	0.388223	6.6721	0.000102838	0.00406022	UP	no	NO
AT3G59710	-1.31576	1.74634	0.000102949	0.00406022	DOWN	no	NO
AT1G19400	0.394907	7.03112	0.00010451	0.00411507	UP	no	NO
AT3G59060	0.401254	7.99115	0.000104584	0.00411507	UP	no	NO
AT5G20990	0.363332	5.83481	0.00010544	0.0041402	UP	no	NO
AT3G61620	0.513772	3.56595	0.000105469	0.0041402	UP	yes	NO
AT2G43630	0.375344	5.46793	0.000105891	0.00415194	UP	no	NO
AT1G69450	-0.506	5.14548	0.000106261	0.00415822	DOWN	no	NO
AT1G75380	-0.596238	8.34597	0.000106298	0.00415822	DOWN	no	YES	1:28282163:C-T;intronic_variant
AT1G24706	0.355819	6.2576	0.000106497	0.00416118	UP	yes	NO
AT4G26600	0.669263	3.01845	0.000106849	0.00417009	UP	no	NO
AT5G05340	-2.04964	0.46553	0.000107587	0.00419404	DOWN	no	NO
AT1G48110	-0.394893	5.29888	0.000107771	0.00419634	DOWN	no	NO
AT1G05360	0.468311	4.82021	0.000108025	0.00420138	UP	no	NO
AT1G55520	0.41085	5.01032	0.000108722	0.00422361	UP	no	NO
AT1G18990	1.08747	1.19292	0.000108873	0.0042246	UP	no	NO
AT2G41060	-0.435204	5.388	0.000109884	0.00425893	DOWN	yes	NO
AT4G34560	-0.692888	3.77653	0.000111544	0.00431829	DOWN	no	NO
AT1G16400	-1.14698	4.25018	0.000111803	0.00432334	DOWN	no	NO
AT5G23110	-0.441429	5.6435	0.000112549	0.0043472	DOWN	no	NO
AT4G15850	0.648823	2.15064	0.000113207	0.0043676	UP	no	YES	4:9001900:C-CT;intronic_variant
AT3G52870	0.490094	5.17595	0.000114932	0.0044291	UP	no	NO
AT3G60400	-0.5946	2.7949	0.000116343	0.00447833	DOWN	no	NO
AT5G40670	-0.445358	5.60017	0.000116949	0.00449654	DOWN	no	NO
AT3G57040	0.753056	6.05687	0.00011742	0.00450949	UP	no	NO
AT5G05140	0.451978	5.55357	0.000119965	0.00460197	UP	no	NO
AT5G46295	2.026	-1.79051	0.000121281	0.00464717	UP	no	NO
AT3G05040	0.416907	4.52394	0.000123669	0.0047333	UP	no	NO
AT2G01918	0.656082	4.25146	0.00012445	0.00475778	UP	no	NO
AT1G53200	0.533885	3.11286	0.000125595	0.00479611	UP	no	NO
AT4G08770	-3.17719	1.42694	0.000126221	0.00481456	DOWN	no	NO
AT3G13530	0.415016	5.40815	0.000127327	0.00485126	UP	no	NO
AT4G11330	0.409312	4.75361	0.000127634	0.00485744	UP	no	NO
AT2G09990	0.409022	5.67899	0.000128681	0.00489178	UP	no	NO
AT3G22420	0.429912	6.14497	0.00013012	0.00494089	UP	no	NO
AT2G40860	-0.42292	4.24201	0.000130456	0.00494807	DOWN	no	NO
AT2G05440	-1.16772	7.25995	0.000130813	0.00495603	DOWN	no	NO
AT5G47380	0.493981	3.5077	0.000131182	0.00496209	UP	no	NO
AT1G53875	-0.705721	3.479	0.000131384	0.00496209	DOWN	no	NO
AT5G13720	-0.402839	4.85212	0.000131415	0.00496209	DOWN	no	NO
AT1G23390	0.823937	8.5148	0.000132361	0.00499222	UP	no	NO
AT1G06360	0.4784	5.47086	0.000133819	0.00504156	UP	no	NO
AT3G15310	-1.08126	1.03321	0.000134084	0.00504591	DOWN	no	NO
AT4G20380	0.398237	5.20096	0.000134617	0.00506032	UP	no	NO
AT2G22200	0.658783	2.91764	0.00013577	0.00509795	UP	no	NO
AT2G27690	1.69506	2.94332	0.000137201	0.00514597	UP	no	NO
AT1G52510	-0.375525	6.87983	0.000138815	0.0052007	DOWN	no	NO
AT2G29350	-3.38342	0.307988	0.000139145	0.00520726	DOWN	no	NO
AT5G03830	-0.472412	4.05274	0.000140658	0.00524829	DOWN	no	NO
ATMG01090	0.862008	1.47848	0.000140666	0.00524829	UP	no	NO
AT3G13782	-0.779029	1.28432	0.000140709	0.00524829	DOWN	no	NO
AT4G36080	-0.401225	5.32125	0.000141571	0.0052746	DOWN	no	NO
AT5G48030	0.425614	5.22367	0.000142039	0.00528099	UP	no	NO
AT1G31040	1.04226	1.94315	0.000142056	0.00528099	UP	no	NO
AT5G66052	0.663111	5.05936	0.000142887	0.00530606	UP	no	NO
AT2G29480	-1.12093	0.43014	0.000143294	0.00531528	DOWN	no	NO
AT1G18590	-0.8844	4.4195	0.000143605	0.00532097	DOWN	no	NO
AT1G12240	0.673578	8.38117	0.000144406	0.00534026	UP	no	NO
AT3G14210	-0.673664	8.32946	0.000144443	0.00534026	DOWN	no	NO
AT1G15010	0.842791	1.63555	0.000144891	0.00535097	UP	no	NO
AT1G59590	0.868409	2.37582	0.000145229	0.00535756	UP	no	NO
AT3G22840	-0.931262	2.82116	0.000146906	0.00540774	DOWN	no	NO
AT1G14020	0.445341	4.1949	0.000146995	0.00540774	UP	no	NO
AT1G64563	-0.707046	1.93848	0.000147071	0.00540774	DOWN	no	NO
AT4G30810	-0.417299	5.19298	0.000147434	0.00541012	DOWN	no	NO
AT3G16430	-0.69654	4.71259	0.000147457	0.00541012	DOWN	no	NO
AT5G56250	-0.601601	4.10015	0.000149209	0.00546847	DOWN	no	NO
AT5G43350	-1.16549	4.17056	0.000149604	0.00547697	DOWN	no	NO
AT2G40970	0.458187	4.71318	0.00015159	0.00554365	UP	no	NO
AT3G23250	-4.2038	-1.92406	0.000154725	0.00565217	DOWN	no	NO
AT5G57550	1.83431	2.32156	0.000156067	0.00569502	UP	no	NO
AT5G50360	1.60969	2.21354	0.00015679	0.00571521	UP	no	NO
AT1G69750	0.408204	4.97698	0.000158825	0.0057831	UP	no	NO
AT3G04720	-1.69282	6.1185	0.000159591	0.00580292	DOWN	no	NO
AT1G48330	-0.673863	2.37547	0.000159848	0.00580292	DOWN	no	NO
AT1G17145	0.411797	5.00393	0.000159886	0.00580292	UP	no	NO
AT1G26220	-0.460277	4.46576	0.000160457	0.00581629	DOWN	no	NO
AT2G36380	-0.506373	6.11675	0.000160599	0.00581629	DOWN	no	NO
AT3G11660	-0.429507	5.24451	0.000161004	0.00582466	DOWN	no	NO
AT3G26165	-0.420423	5.41323	0.000162103	0.00585816	DOWN	no	NO
AT2G26020	-4.74855	-2.34319	0.000162395	0.00586241	DOWN	no	NO
AT2G24150	0.420131	5.4333	0.000162641	0.00586501	UP	no	NO
AT5G25250	-2.33424	-0.0177917	0.000163101	0.0058753	DOWN	no	NO
AT1G06370	0.544366	3.17996	0.000163649	0.00588875	UP	no	NO
AT2G30770	-7.21724	0.089269	0.000163886	0.00589098	DOWN	no	NO
AT2G43000	-3.23759	-1.3386	0.000164686	0.00591342	DOWN	no	NO
AT5G16280	0.368629	5.85327	0.000165008	0.00591866	UP	no	YES	5:5331499:G-A;exonic_variant
AT2G43020	-0.444007	5.23583	0.000165511	0.00593041	DOWN	no	NO
AT1G70850	-1.0324	7.78998	0.000166018	0.00594224	DOWN	no	NO
AT4G13495	0.360405	8.77018	0.000169231	0.00605083	UP	no	NO
AT4G03410	-0.476122	4.41077	0.0001716	0.00612902	DOWN	no	NO
AT2G30860	-0.619581	8.52705	0.000172013	0.00613726	DOWN	no	NO
AT1G52530	-1.43235	-0.76918	0.000172488	0.0061477	DOWN	no	NO
AT2G46870	-0.436046	4.8302	0.000175006	0.00623084	DOWN	no	NO
AT5G13280	0.364531	5.73163	0.00017559	0.00623748	UP	no	NO
AT3G04600	0.406197	4.98046	0.00017574	0.00623748	UP	no	NO
AT1G60190	1.56954	4.9303	0.000175748	0.00623748	UP	no	NO
AT1G09575	0.744158	2.72629	0.000176103	0.0062435	UP	no	NO
AT4G02680	-0.35819	5.3506	0.000177695	0.00629272	DOWN	no	NO
AT4G36640	-0.697244	3.71462	0.000177865	0.00629272	DOWN	no	NO
AT3G11080	-0.936805	0.85253	0.000178859	0.0063209	DOWN	no	NO
AT2G20810	-0.393337	4.52973	0.000179037	0.0063209	DOWN	no	NO
AT4G32420	0.352444	5.83153	0.000180637	0.00637073	UP	no	NO
AT3G26920	0.463008	4.00534	0.000181493	0.00639299	UP	no	NO
AT1G12200	-0.724659	4.14217	0.000181648	0.00639299	DOWN	no	NO
AT2G40316	0.43714	4.6808	0.000183776	0.00646113	UP	no	NO
AT5G18310	-0.560188	4.76638	0.000184498	0.00647975	DOWN	no	NO
AT5G45310	0.697153	4.90595	0.000185821	0.00651941	UP	no	NO
AT1G67265	1.25298	1.46349	0.000186174	0.006525	UP	no	NO
AT4G37530	-0.826128	2.51919	0.000186388	0.00652571	DOWN	no	NO
AT5G03204	1.70119	-0.240309	0.00018695	0.00653859	UP	no	NO
AT5G65600	-3.77549	-2.19534	0.000187212	0.00654094	DOWN	no	NO
AT3G03170	0.810285	3.096	0.000188249	0.00657037	UP	no	NO
AT5G38000	-1.8071	-0.434959	0.000189052	0.00659157	DOWN	no	NO
AT5G07980	-0.382717	4.68886	0.000191128	0.00665705	DOWN	no	NO
AT5G04250	0.613829	2.90378	0.000192139	0.00668536	UP	no	NO
AT2G28500	0.935692	0.668114	0.000192376	0.0066867	UP	no	NO
AT3G63150	0.366215	5.37845	0.000193184	0.00670788	UP	no	NO
AT3G45750	0.467632	3.84479	0.000193872	0.00672484	UP	no	NO
AT4G24120	-1.19942	4.17245	0.000195345	0.00676894	DOWN	no	NO
AT5G19280	0.360705	5.02158	0.000196536	0.00680323	UP	no	YES	5:6492392:T-TA;intronic_variant
AT1G01240	-0.391876	6.06459	0.000199244	0.00688986	DOWN	no	NO
AT5G57190	0.801978	2.25671	0.000201757	0.00696961	UP	no	NO
AT3G26340	0.488979	4.01336	0.000202696	0.00699488	UP	no	NO
AT4G35060	-0.744053	3.02592	0.000203384	0.00701143	DOWN	no	NO
AT1G01510	0.36105	5.54883	0.000204124	0.00702765	UP	no	NO
AT4G09460	0.52048	4.10993	0.000204272	0.00702765	UP	no	NO
AT2G31751	-0.547858	3.15364	0.000206256	0.00708869	DOWN	no	NO
AT1G35230	-2.04331	-1.60079	0.000207138	0.00711174	DOWN	no	NO
AT4G34280	0.39307	5.04142	0.000207475	0.00711605	UP	no	NO
AT3G63120	0.456789	4.44253	0.000209713	0.00718549	UP	no	NO
AT3G23550	-2.36812	-0.222332	0.00021214	0.00726127	DOWN	no	NO
AT5G60650	-1.21264	-0.192938	0.000212388	0.00726236	DOWN	no	NO
AT4G39955	-0.531315	3.89655	0.000215613	0.00736517	DOWN	no	NO
AT1G32640	0.852451	6.14259	0.000217317	0.00741585	UP	no	NO
AT1G31360	0.463502	3.79749	0.000218401	0.00744531	UP	no	NO
AT2G43590	-1.27221	4.72219	0.000218764	0.00745015	DOWN	no	NO
AT5G61330	0.378409	5.67373	0.000219375	0.0074634	UP	no	YES	5:24660276:T-TAAAAAAAAA;intronic_variant,5:24660276:T-TAAAAAAAAA;exonic_variant
AT3G63330	0.426171	4.57835	0.000220373	0.00748979	UP	no	NO
AT3G54040	-0.916866	2.97198	0.00022076	0.00749538	DOWN	no	NO
AT1G06630	0.403317	4.56072	0.000221046	0.00749754	UP	no	NO
AT1G31812	0.363194	8.31363	0.000222548	0.00754089	UP	no	NO
AT3G16460	-0.74501	7.83815	0.000223283	0.00755818	DOWN	no	NO
AT4G14040	-0.663924	6.69563	0.00022423	0.0075826	DOWN	no	NO
AT3G06380	0.368649	5.89299	0.000225619	0.00762193	UP	no	NO
AT3G20010	0.477807	4.43062	0.000226398	0.00762743	UP	no	NO
AT3G18760	0.609409	2.87092	0.000226552	0.00762743	UP	no	NO
AT2G41880	0.471571	3.69878	0.00022663	0.00762743	UP	no	NO
AT1G53810	5.59886	-3.09198	0.000226687	0.00762743	UP	no	NO
AT3G28740	-1.03135	5.2857	0.00022739	0.00764342	DOWN	no	NO
AT1G75370	0.362065	6.44099	0.000228455	0.00767159	UP	no	NO
AT1G43980	1.06451	0.411156	0.000229222	0.00768101	UP	no	YES	1:16689269:C-T;protein_coding;sense;AAG>AAA;K>K
AT2G33830	0.615747	8.07022	0.000229377	0.00768101	UP	no	NO
AT1G27200	0.61047	5.01235	0.00022947	0.00768101	UP	no	NO
AT1G73875	0.478068	3.59597	0.000229648	0.00768101	UP	no	NO
AT3G46640	0.752189	2.79091	0.000232115	0.00775582	UP	no	NO
AT2G31740	0.422534	4.68655	0.000232601	0.00776436	UP	no	NO
AT2G14560	-4.60367	-0.869052	0.000233359	0.00778195	DOWN	no	NO
AT2G32885	1.04747	1.37029	0.000233828	0.00778393	UP	no	NO
AT1G24095	0.976128	1.18768	0.00023409	0.00778393	UP	no	NO
AT1G76790	-1.12064	4.43421	0.000234112	0.00778393	DOWN	no	NO
AT1G05180	0.352212	5.15268	0.000235317	0.00781629	UP	no	NO
AT5G65230	-1.18554	-0.133397	0.000236088	0.00783416	DOWN	no	NO
AT5G48410	-1.14635	-0.140224	0.00023736	0.00786863	DOWN	no	NO
AT1G65800	-0.428621	5.10232	0.000238793	0.00790834	DOWN	no	NO
AT3G18860	0.360617	5.86568	0.000241412	0.00798724	UP	no	YES	3:6505057:G-A;splice_donor_region_variant
AT1G65070	-0.426643	4.88545	0.000242161	0.00799809	DOWN	no	NO
AT1G14120	-0.867278	3.23775	0.000242215	0.00799809	DOWN	no	NO
AT5G24590	0.392093	4.82698	0.000242982	0.00801555	UP	no	NO
AT1G59950	-6.87142	-3.06487	0.000243626	0.00802893	DOWN	no	NO
AT1G07400	1.31326	2.18106	0.00024532	0.00807687	UP	no	NO
AT3G20380	-1.42989	1.26444	0.00024587	0.00808704	DOWN	no	NO
AT5G57250	-0.427425	3.87663	0.000246266	0.00809218	DOWN	no	NO
AT1G79380	-0.394587	5.77563	0.000246915	0.0081056	DOWN	no	NO
AT1G18710	0.926109	4.9816	0.000258472	0.00847674	UP	no	YES	1:6452759:G-A;exonic_variant,1:6452759:G-A;protein_coding;missense;GAA>AAA;E>K
AT4G21380	-1.03082	0.918511	0.000259517	0.0084947	DOWN	no	NO
AT3G61420	0.356	6.0456	0.000259525	0.0084947	UP	no	NO
AT2G17450	0.404186	5.0708	0.000260402	0.00851515	UP	no	NO
AT1G01950	0.405825	4.61531	0.000260831	0.00851727	UP	no	NO
AT3G18290	0.759476	6.55376	0.000260973	0.00851727	UP	no	NO
AT1G21310	-1.26222	7.88815	0.000261858	0.00853223	DOWN	no	NO
AT1G06560	0.507926	3.74196	0.000261938	0.00853223	UP	no	NO
AT5G57100	0.468144	3.96778	0.000262568	0.00854448	UP	no	NO
AT2G01530	-0.764842	5.69046	0.000263041	0.00855082	DOWN	no	NO
AT1G56060	-2.94483	-2.80092	0.00026327	0.00855082	DOWN	no	NO
AT2G34430	0.447669	10.9332	0.000263867	0.00855218	UP	no	NO
AT2G15020	-1.33313	5.50243	0.000264052	0.00855218	DOWN	no	NO
AT2G19930	-0.52156	3.49258	0.0002643	0.00855218	DOWN	no	NO
AT4G14920	-0.41648	5.43106	0.000264328	0.00855218	DOWN	no	YES	4:8536282:TC-T;splice_donor_region_variant
AT1G05370	0.748653	1.3301	0.000267331	0.00864107	UP	no	NO
AT5G39030	-0.775114	2.6611	0.000267684	0.00864416	DOWN	no	NO
AT4G05150	0.340542	7.80787	0.000268043	0.00864745	UP	no	NO
AT1G74210	-1.04854	3.59131	0.000268955	0.00866858	DOWN	no	NO
AT5G47435	0.363396	5.49944	0.000269217	0.00866875	UP	no	NO
AT5G67480	0.803474	5.70909	0.000269857	0.00867799	UP	no	NO
AT2G07811	0.751601	2.45632	0.00027002	0.00867799	UP	no	YES	2:3314501:G-A;exonic_variant
AT3G49570	-2.0138	1.6601	0.000274947	0.00882792	DOWN	no	NO
AT2G38840	0.377809	4.79007	0.000275673	0.00883655	UP	no	NO
AT3G22231	-8.48871	-1.902	0.000276004	0.00883655	DOWN	no	NO
AT5G26260	-1.79684	4.98722	0.000276179	0.00883655	DOWN	no	NO
AT4G38350	-0.34477	6.74102	0.000276265	0.00883655	DOWN	no	NO
AT5G33395	1.03195	0.76495	0.000277194	0.00885785	UP	no	NO
AT4G17460	0.557296	5.53126	0.000277711	0.00886597	UP	no	NO
AT1G11700	-0.833966	3.74212	0.000280301	0.00894015	DOWN	no	NO
AT1G60730	-0.910378	3.52646	0.00028157	0.00896548	DOWN	no	NO
AT4G26140	0.451666	4.22389	0.000281658	0.00896548	UP	no	NO
AT5G14520	0.40095	5.24998	0.000281893	0.00896548	UP	no	NO
AT5G48240	0.526156	3.60842	0.000282826	0.00898666	UP	no	NO
AT2G39400	0.476757	6.5888	0.000283329	0.00898696	UP	no	NO
AT5G15440	0.410291	4.45862	0.000283369	0.00898696	UP	no	NO
AT1G34760	0.416371	4.39128	0.000283736	0.00899014	UP	no	NO
AT2G39810	0.343845	5.38071	0.000284152	0.00899066	UP	no	NO
AT3G21750	-0.399375	4.61271	0.000284286	0.00899066	DOWN	no	NO
AT2G36420	0.510017	4.60511	0.000285112	0.0090083	UP	no	NO
AT2G43080	0.395435	4.90043	0.000285531	0.00901308	UP	no	NO
AT4G23880	0.734283	3.69777	0.000286655	0.00903979	UP	no	NO
AT2G47240	0.392265	5.73901	0.000286914	0.00903979	UP	no	NO
AT4G12550	-2.3077	3.64074	0.000287804	0.00905497	DOWN	no	NO
AT5G40170	-0.366926	5.77409	0.000287933	0.00905497	DOWN	no	NO
AT1G80930	0.337237	6.62921	0.000289782	0.00910463	UP	yes	NO
AT5G25520	-0.340159	5.72844	0.000290507	0.00911889	DOWN	no	NO
AT1G80110	1.03094	3.25436	0.000292172	0.00916263	UP	no	NO
AT3G48420	-0.369863	6.83929	0.000296176	0.0092727	DOWN	no	NO
AT1G68370	0.342796	5.42713	0.000296233	0.0092727	UP	no	NO
AT3G43955	-0.416541	4.62748	0.000297869	0.00931178	DOWN	no	NO
AT3G23880	0.540084	4.50027	0.000298296	0.00931178	UP	no	NO
AT4G03510	0.649135	5.60561	0.000298311	0.00931178	UP	no	NO
AT4G25707	0.874487	1.78373	0.0003	0.00935583	UP	no	NO
AT4G27670	3.75095	-2.74148	0.0003039	0.0094687	UP	no	NO
AT5G51540	0.689782	2.7459	0.00030518	0.00949977	UP	no	NO
AT3G49940	0.389517	5.72639	0.000306087	0.00951922	UP	no	NO
AT4G30440	0.441419	6.78712	0.000308051	0.00957147	UP	no	NO
AT2G39380	-1.06005	2.11384	0.000309577	0.00961001	DOWN	no	NO
AT2G30020	0.622873	3.57013	0.000310045	0.00961568	UP	no	NO
AT1G13260	0.693679	6.09637	0.00031107	0.00963214	UP	no	NO
AT4G08300	-2.42429	0.947363	0.000311148	0.00963214	DOWN	no	NO
AT2G23460	0.347611	5.75227	0.000311544	0.00963553	UP	no	YES	2:9997784:G-A;splice_acceptor_variant
AT5G37770	0.701315	5.03966	0.000311908	0.00963795	UP	no	NO
AT2G02400	-0.508981	3.43966	0.00031278	0.00964731	DOWN	no	NO
AT3G02480	1.83463	4.72883	0.000313246	0.00964731	UP	no	NO
AT1G69730	-0.797427	3.63582	0.000313585	0.00964731	DOWN	no	NO
AT2G35950	0.649554	2.97633	0.000313798	0.00964731	UP	no	NO
AT4G24350	-0.540685	4.74513	0.0003139	0.00964731	DOWN	no	NO
AT3G51260	0.335938	6.22174	0.000313929	0.00964731	UP	no	YES	3:19031123:C-T;protein_coding;missense;CCC>CTC;P>L
AT3G62550	0.381199	8.21477	0.00031471	0.00966249	UP	no	NO
AT5G23830	-1.44856	2.86294	0.000319266	0.00979078	DOWN	no	NO
AT1G24020	-0.746494	4.85262	0.00031947	0.00979078	DOWN	no	NO
AT2G24580	-0.469768	4.01904	0.000320202	0.00980429	DOWN	no	NO
AT3G29670	0.752555	2.84084	0.000321695	0.00983867	UP	no	NO
AT3G26310	-0.494817	4.50646	0.000321909	0.00983867	DOWN	no	NO
AT5G23710	0.515846	3.2865	0.000323472	0.00987516	UP	no	NO
AT2G05210	-0.444501	4.33345	0.000323689	0.00987516	DOWN	no	NO
AT2G16005	-2.40577	1.22758	0.000329935	0.0100566	DOWN	no	NO
AT4G11910	-0.860995	1.57295	0.000331661	0.0100891	DOWN	no	NO
AT5G04275	-1.72544	-1.75056	0.000332089	0.0100891	DOWN	no	NO
AT1G73330	-1.20226	6.94954	0.000332361	0.0100891	DOWN	no	NO
AT4G21903	-1.82241	-0.897535	0.000332407	0.0100891	DOWN	no	NO
AT4G02760	0.483883	3.4057	0.000332501	0.0100891	UP	no	NO
AT3G57170	0.368193	5.72428	0.000333203	0.0101014	UP	no	NO
AT1G30500	0.433358	4.20286	0.000333692	0.010104	UP	no	NO
AT1G64570	-0.471682	4.83752	0.000334424	0.010104	DOWN	no	NO
AT2G07773	2.12592	-1.94292	0.00033443	0.010104	UP	no	NO
AT4G27310	-0.343469	6.37334	0.000334491	0.010104	DOWN	no	NO
AT3G53600	-4.23979	-3.14444	0.000334996	0.0101102	DOWN	no	NO
AT1G77440	0.360867	5.10714	0.000338434	0.0101968	UP	no	NO
AT2G25590	-0.520948	4.94476	0.00033847	0.0101968	DOWN	no	NO
AT4G29040	0.343167	6.67602	0.000339677	0.010224	UP	no	NO
AT2G30790	0.690241	3.42129	0.000340158	0.0102294	UP	no	NO
AT5G51720	-1.06779	6.13832	0.000342728	0.0102974	DOWN	no	NO
AT4G08040	1.81842	-0.167697	0.000344393	0.0103298	UP	no	NO
AT1G29320	0.568537	3.08039	0.000344683	0.0103298	UP	no	NO
AT4G21990	-1.09474	5.46201	0.000344727	0.0103298	DOWN	no	NO
AT5G17930	0.378463	4.4425	0.00034651	0.010374	UP	no	NO
AT3G45890	0.476567	3.90549	0.000347603	0.0103975	UP	no	NO
AT5G37990	-1.67527	3.23392	0.000350743	0.0104822	DOWN	no	NO
AT3G60120	-5.68063	-2.54905	0.000351316	0.01049	DOWN	no	NO
AT1G02560	-0.331651	8.06658	0.000351888	0.0104977	DOWN	no	NO
AT2G18890	0.501107	3.77864	0.000353199	0.0105275	UP	no	NO
AT4G32212	-2.63779	-2.14405	0.000356373	0.0106085	DOWN	no	NO
AT3G17630	-0.666425	1.82948	0.000356547	0.0106085	DOWN	no	NO
AT4G28880	0.334975	6.70902	0.000359006	0.010671	UP	no	NO
AT1G66700	-3.24961	-0.539309	0.000359279	0.010671	DOWN	no	NO
AT4G30910	0.378962	4.96545	0.000361271	0.0107207	UP	no	NO
AT1G03790	0.906967	3.81705	0.000361969	0.0107319	UP	no	NO
AT2G46800	0.360424	6.56599	0.000364584	0.0108	UP	no	NO
AT5G63350	1.44382	3.08662	0.000365149	0.0108072	UP	no	NO
AT3G16240	0.406231	9.82034	0.00036829	0.0108906	UP	no	NO
AT4G04840	-0.76813	4.5662	0.000369241	0.0109091	DOWN	no	NO
AT2G20390	0.553725	3.63856	0.000371091	0.0109542	UP	no	NO
AT5G45472	-0.729003	2.11178	0.000372239	0.0109785	DOWN	no	NO
AT2G18440	0.348781	8.25227	0.000373675	0.0110111	UP	no	NO
AT3G58900	-0.549883	3.65342	0.000375327	0.0110502	DOWN	no	NO
AT5G10940	0.341613	5.65029	0.000378483	0.0111334	UP	no	NO
AT2G40930	0.335987	5.47419	0.000380304	0.0111771	UP	no	NO
AT1G07150	0.650884	3.09908	0.000381755	0.01121	UP	no	NO
AT5G40450	-0.507438	6.78366	0.000385737	0.0113157	DOWN	no	NO
AT4G38270	0.38043	5.12808	0.000386024	0.0113157	UP	no	NO
AT4G01950	0.771323	5.36514	0.000387126	0.0113381	UP	no	NO
AT5G19310	0.423776	4.68532	0.000388355	0.0113642	UP	no	NO
AT4G01935	-0.395892	4.48976	0.000388734	0.0113654	DOWN	no	NO
AT3G06150	0.390064	4.86514	0.000389593	0.0113807	UP	no	NO
AT2G31083	1.71613	0.673719	0.000391802	0.0114353	UP	no	NO
AT4G36940	0.401225	4.43577	0.000393317	0.0114695	UP	no	NO
AT3G49580	-2.18655	2.00769	0.000394441	0.0114924	DOWN	no	NO
AT1G17170	-1.77673	2.9166	0.00039698	0.0115507	DOWN	no	NO
AT5G24000	0.43256	4.06743	0.000397129	0.0115507	UP	no	NO
AT1G18670	0.379654	4.64077	0.000398728	0.0115872	UP	no	NO
AT4G15215	0.613196	2.59953	0.000399715	0.0116059	UP	no	NO
AT1G02990	-0.394255	4.87669	0.000400517	0.0116191	DOWN	no	NO
AT3G19710	-1.37655	5.97936	0.000402547	0.011668	DOWN	no	NO
AT4G11900	-0.507534	3.74521	0.000408042	0.0118095	DOWN	no	NO
AT3G25430	0.500732	3.28719	0.000408132	0.0118095	UP	no	NO
AT3G10700	0.408822	4.12037	0.00040849	0.0118098	UP	no	NO
AT1G04810	0.353601	5.99387	0.000411924	0.0118955	UP	no	NO
AT4G12320	-0.719924	5.36587	0.000412162	0.0118955	DOWN	no	NO
AT2G21580	0.418029	6.34387	0.000415312	0.0119761	UP	no	NO
AT5G06620	0.735301	2.08252	0.000418176	0.0120484	UP	no	NO
AT3G10150	-1.06644	1.04786	0.000420704	0.0121109	DOWN	no	NO
AT1G61340	0.780597	2.44278	0.000421262	0.0121166	UP	no	NO
AT5G61240	-0.457529	4.9524	0.000421899	0.0121246	DOWN	no	NO
AT5G09300	-0.872659	1.96385	0.000426642	0.0122504	DOWN	no	NO
AT1G04730	0.671911	2.59443	0.000427478	0.012264	UP	no	NO
AT1G42440	0.361747	5.11317	0.00043289	0.0124087	UP	no	NO
AT2G42670	0.410805	3.99267	0.000433608	0.0124187	UP	no	NO
AT2G30100	-0.394976	4.53826	0.000434748	0.0124407	DOWN	no	NO
AT1G21240	-3.15018	-2.61913	0.000436612	0.0124835	DOWN	no	NO
AT5G03555	-0.455998	5.27229	0.000438536	0.0125279	DOWN	no	NO
AT1G13160	0.396537	4.30895	0.000439127	0.0125296	UP	no	NO
AT4G33060	0.355288	4.75342	0.000439342	0.0125296	UP	yes	NO
AT5G23880	0.472873	4.30434	0.000447075	0.0127394	UP	yes	NO
AT3G16420	-0.530233	8.35263	0.000452648	0.0128873	DOWN	no	NO
AT5G66270	-0.717776	1.51846	0.000454348	0.0129247	DOWN	no	YES	5:26475248:G-GA;intronic_variant
AT2G01870	-0.526513	3.82316	0.000454779	0.0129261	DOWN	no	NO
AT1G54050	0.86802	2.96689	0.000456801	0.0129632	UP	no	NO
AT1G17640	0.495826	3.31994	0.000456855	0.0129632	UP	yes	NO
AT1G64160	-6.18754	-2.90426	0.000461074	0.0130719	DOWN	no	NO
AT2G47960	0.344871	5.48426	0.000464188	0.0131394	UP	no	YES	2:19625963:C-CTATA;intronic_variant,2:19627831:C-T;protein_coding;stop-gain;CAG>TAG;Q>*,2:19627831:C-T;intronic_variant
AT4G24570	1.40843	2.67243	0.000464234	0.0131394	UP	no	NO
AT1G49780	0.715462	3.90936	0.000466963	0.0132055	UP	no	NO
AT5G19820	0.322944	6.73514	0.000468618	0.0132403	UP	no	NO
AT3G51400	1.01352	1.21734	0.000468978	0.0132403	UP	no	NO
AT5G38030	-1.02468	2.43565	0.000470186	0.0132633	DOWN	no	NO
AT1G55690	0.449318	4.86557	0.000478089	0.0134749	UP	no	NO
AT2G04090	-0.981997	0.52777	0.000480808	0.0135351	DOWN	no	NO
AT3G28900	0.39121	5.63186	0.000481144	0.0135351	UP	no	NO
AT4G24700	-0.743421	2.8728	0.00048143	0.0135351	DOWN	no	NO
AT1G07600	-0.66183	2.36088	0.00048335	0.0135777	DOWN	no	NO
AT1G56612	0.446734	3.81075	0.000483753	0.0135777	UP	no	NO
AT1G30720	0.922978	1.57542	0.000488318	0.0136945	UP	no	NO
AT3G01350	0.673865	2.48178	0.000492486	0.0137998	UP	no	NO
AT5G08230	-0.481338	4.4161	0.000497304	0.0139233	DOWN	no	NO
AT5G01520	0.640196	5.91059	0.000501456	0.0140279	UP	no	NO
AT1G12820	0.358294	6.10436	0.000502522	0.014046	UP	no	NO
AT5G15190	0.83421	3.1955	0.00050713	0.014163	UP	no	NO
AT4G31550	0.471425	5.10407	0.000508065	0.0141731	UP	no	NO
AT5G24290	-0.909736	2.46348	0.000508531	0.0141731	DOWN	no	NO
AT1G55310	0.385991	5.89376	0.000508762	0.0141731	UP	yes	NO
AT1G08270	-1.11861	-0.215245	0.000509387	0.0141731	DOWN	no	NO
AT5G22794	-0.713078	3.07509	0.000509675	0.0141731	DOWN	no	YES	5:7610318:A-T;exonic_variant
AT2G18150	-2.38953	0.892817	0.000510015	0.0141731	DOWN	no	NO
AT1G64810	-0.350312	5.18258	0.000512666	0.014234	DOWN	no	NO
AT2G28200	0.435203	4.66744	0.000513426	0.014234	UP	no	NO
AT5G54640	-0.436307	4.69849	0.000513474	0.014234	DOWN	no	NO
AT1G78476	-1.27832	-0.960258	0.00051612	0.0142956	DOWN	no	NO
AT3G44695	1.9508	-2.02228	0.000516788	0.0143023	UP	no	NO
AT4G33030	-0.529147	6.59093	0.000518054	0.0143256	DOWN	no	NO
AT5G58610	1.70537	-0.426045	0.000519156	0.0143443	UP	no	NO
AT5G42050	0.392637	7.34051	0.000520447	0.0143682	UP	no	NO
AT1G75800	0.452619	6.87971	0.000524177	0.0144521	UP	no	NO
AT3G57680	-0.689637	2.65896	0.000524344	0.0144521	DOWN	no	NO
AT1G21270	-1.09469	3.09819	0.000524816	0.0144532	DOWN	no	NO
AT1G08920	0.565732	5.23522	0.000525604	0.0144631	UP	no	YES	1:2869697:C-T;intronic_variant
AT5G50180	-0.34406	5.2287	0.00052629	0.0144702	DOWN	no	NO
AT3G08520	0.419772	5.64485	0.000527358	0.0144877	UP	no	NO
AT1G21520	-1.00972	2.47698	0.000527965	0.0144926	DOWN	no	NO
AT1G13060	0.312723	6.38259	0.000529676	0.0145277	UP	no	NO
AT3G09490	-1.13964	0.56879	0.000530383	0.0145353	DOWN	no	NO
AT2G41150	-0.807636	1.59971	0.000530876	0.0145369	DOWN	no	NO
AT1G62560	-1.02707	3.55723	0.000531395	0.0145393	DOWN	no	NO
AT5G05220	2.06658	-0.765035	0.000532691	0.014563	UP	no	NO
AT3G18940	0.401654	4.11655	0.00053515	0.0146183	UP	no	NO
AT5G58200	-0.348028	5.93304	0.000537078	0.014648	DOWN	no	NO
AT1G52120	-3.92134	-2.47387	0.000537375	0.014648	DOWN	no	NO
AT3G02140	0.742951	2.15063	0.000537541	0.014648	UP	no	NO
AT1G02850	-0.591511	6.04705	0.000538206	0.0146543	DOWN	no	NO
AT1G22870	0.402485	4.67912	0.000538847	0.0146599	UP	no	NO
AT1G22660	0.41413	4.16265	0.000542386	0.0147442	UP	no	NO
AT4G08290	-0.780344	4.87457	0.000545456	0.0148122	DOWN	no	NO
AT2G22530	0.372794	4.27411	0.000545804	0.0148122	UP	no	NO
AT5G07030	-0.62221	5.00942	0.000546206	0.0148122	DOWN	no	NO
AT1G11060	0.358998	4.51866	0.000549246	0.0148691	UP	no	NO
AT2G34600	1.88983	3.16578	0.000549398	0.0148691	UP	no	NO
AT5G17440	0.333326	4.91551	0.000549626	0.0148691	UP	no	NO
AT5G66810	0.329963	5.19954	0.000551674	0.0149125	UP	no	NO
AT5G51430	0.341477	5.7259	0.0005573	0.0150525	UP	no	NO
AT4G14630	-3.02616	-1.30116	0.000558816	0.0150813	DOWN	no	NO
AT4G15740	-3.14609	-2.00999	0.000559488	0.0150874	DOWN	no	NO
AT2G37030	1.32832	2.04749	0.000559989	0.0150888	UP	no	NO
AT2G05380	-0.552026	9.29966	0.000563044	0.015159	DOWN	no	NO
AT2G28520	0.348251	5.49942	0.000567465	0.0152658	UP	no	NO
AT2G20850	0.364231	4.9538	0.000568133	0.0152716	UP	no	NO
AT3G57350	0.417596	4.3011	0.000571339	0.0153358	UP	no	YES	3:21222414:AG-A;splice_acceptor_region_variant
AT5G10625	-0.924659	3.72348	0.0005715	0.0153358	DOWN	no	NO
AT1G19660	-0.386785	8.06073	0.000571888	0.0153358	DOWN	no	NO
AT1G14250	-1.55567	-0.156726	0.000572721	0.0153407	DOWN	no	YES	1:4870090:A-AG;intronic_variant,1:4870343:C-T;protein_coding;missense;CCT>CTT;P>L
AT1G56130	0.710755	2.29352	0.00057298	0.0153407	UP	no	NO
AT5G38100	-1.38056	1.1027	0.000575248	0.0153891	DOWN	no	NO
AT1G62030	-0.479936	3.66272	0.000575741	0.0153901	DOWN	no	NO
AT3G49110	-1.17542	3.29752	0.000576632	0.0153928	DOWN	no	NO
AT4G14710	-0.339309	6.08881	0.000576756	0.0153928	DOWN	no	NO
AT3G46660	-2.20504	-1.21466	0.000577453	0.0153953	DOWN	no	NO
AT4G20320	0.380769	5.40516	0.000577764	0.0153953	UP	no	NO
AT1G13670	0.639191	3.21431	0.000579726	0.0154354	UP	no	NO
AT3G15630	0.638952	4.63135	0.000581311	0.0154653	UP	no	NO
AT2G40390	-0.636644	2.77672	0.000582773	0.0154892	DOWN	no	NO
AT5G41410	-0.461739	4.28474	0.000583128	0.0154892	DOWN	no	NO
AT4G09980	-0.42193	4.34892	0.000584241	0.0155066	DOWN	yes	NO
AT5G49430	0.349579	5.16244	0.000586033	0.0155419	UP	no	NO
AT1G02670	0.829964	1.39202	0.000589015	0.0156087	UP	no	NO
AT2G15940	1.59095	-1.57821	0.000590848	0.0156449	UP	no	NO
AT5G49525	0.897901	1.96982	0.000595147	0.0157464	UP	no	NO
AT4G17840	-0.360997	7.21522	0.000596581	0.0157653	DOWN	no	NO
AT1G67840	-0.364137	6.25571	0.00059737	0.0157653	DOWN	no	NO
AT1G17260	0.645522	1.78102	0.000597374	0.0157653	UP	no	YES	1:5906995:C-CA;splice_donor_region_variant
AT3G50240	0.359422	5.66043	0.000597735	0.0157653	UP	no	NO
AT1G69530	-0.769252	7.55136	0.000606106	0.0159736	DOWN	no	NO
AT2G35920	0.378251	5.8397	0.000608711	0.0160297	UP	no	NO
AT5G53990	-1.44711	1.1006	0.00061231	0.0160998	DOWN	no	NO
AT4G10845	-0.664159	2.2215	0.000612328	0.0160998	DOWN	no	YES	4:6669072:T-A;exonic_variant,4:6666176:GTTCATGTGTGCATACATTCATGTGTGCATACATTCATGTGTGCATACA-G;intronic_variant
AT1G17750	-0.911997	1.11282	0.00061393	0.0161215	DOWN	no	NO
AT4G36980	-0.368231	6.94537	0.00061411	0.0161215	DOWN	no	NO
AT1G67030	-0.893082	2.34159	0.000614844	0.0161282	DOWN	no	NO
AT2G35980	-2.0531	-0.316664	0.000615512	0.0161331	DOWN	no	YES	2:15110710:C-T;protein_coding;stop-gain;CGA>TGA;R>*
AT2G43535	-1.36608	4.33907	0.000617636	0.0161762	DOWN	no	NO
AT1G66570	-6.64714	-2.37941	0.000619999	0.0162255	DOWN	no	NO
AT2G25490	-0.509168	7.09845	0.000621438	0.0162505	DOWN	no	YES	2:10850041:CTA-C;intronic_variant
AT3G51238	1.80756	-1.25071	0.00062218	0.0162573	UP	no	NO
AT5G20550	-1.28814	0.458375	0.000624821	0.0163137	DOWN	no	NO
AT2G44120	0.401304	6.90998	0.000627549	0.0163722	UP	no	NO
AT1G51400	-0.326067	9.07263	0.000635924	0.0165778	DOWN	no	NO
AT2G26980	0.426315	7.6621	0.000636781	0.0165873	UP	no	NO
AT3G04520	-0.39861	4.50615	0.000637299	0.016588	DOWN	no	NO
AT3G11120	0.487239	5.03407	0.000638003	0.0165935	UP	no	NO
AT4G01400	-0.825874	0.645004	0.000642336	0.0166933	DOWN	no	NO
AT2G43465	0.494548	2.78381	0.000643467	0.0167098	UP	no	NO
AT4G28010	-0.586244	1.89248	0.000644552	0.0167175	DOWN	no	NO
AT5G11850	0.396799	5.11896	0.000644755	0.0167175	UP	no	NO
AT1G21120	-1.64579	0.111543	0.000645849	0.016721	DOWN	no	NO
AT3G10060	-0.408174	6.4741	0.000645884	0.016721	DOWN	no	NO
AT1G06760	-0.604727	7.71312	0.000647773	0.016757	DOWN	no	NO
AT5G51550	0.556024	5.19092	0.000653686	0.016897	UP	no	NO
AT4G31985	0.403306	6.55416	0.000655258	0.0169247	UP	no	NO
AT3G13065	-0.617408	4.46799	0.000656848	0.0169527	DOWN	no	NO
AT3G19290	0.448278	6.5164	0.000658111	0.0169723	UP	no	NO
AT1G52300	0.427398	7.52248	0.000664418	0.0171106	UP	no	NO
AT3G56400	0.697257	4.37047	0.000664488	0.0171106	UP	no	NO
AT3G55130	-0.520312	4.97007	0.00066623	0.0171423	DOWN	no	NO
AT2G05950	1.06122	1.1182	0.000670263	0.0172329	UP	no	YES	2:2296621:A-G;intronic_variant,2:2296614:A-T;intronic_variant,2:2296621:A-G;exonic_variant,2:2296614:A-T;exonic_variant
AT1G66760	0.405475	7.17251	0.000672628	0.0172805	UP	no	NO
AT3G18740	0.399082	6.77911	0.000675006	0.0173284	UP	no	NO
AT4G16260	-1.36935	4.28817	0.000681446	0.0174804	DOWN	no	NO
AT3G29270	-0.369542	4.59556	0.000684292	0.0175401	DOWN	no	NO
AT5G23010	-1.03357	7.15481	0.000686844	0.0175849	DOWN	no	NO
AT1G32928	0.820444	2.37139	0.000687513	0.0175849	UP	no	NO
AT2G31380	-0.596194	5.91606	0.000687608	0.0175849	DOWN	no	NO
AT1G21250	-1.29853	2.67884	0.000690654	0.0176494	DOWN	no	NO
AT5G61880	0.577457	3.05898	0.000693468	0.0177079	UP	no	NO
AT1G52230	-0.33342	9.87793	0.000695109	0.0177363	DOWN	no	NO
AT5G24200	-1.88659	-2.07515	0.000698228	0.0178024	DOWN	no	NO
AT4G27130	0.401921	6.1249	0.000701955	0.0178708	UP	no	NO
AT2G45730	0.355305	4.54861	0.000702152	0.0178708	UP	no	NO
AT5G06580	0.330998	5.08005	0.000702503	0.0178708	UP	no	NO
AT5G01970	0.409885	3.88656	0.000704909	0.0179185	UP	no	NO
AT1G17680	0.327433	5.11854	0.000713287	0.0181178	UP	no	NO
AT4G00750	0.362647	5.53525	0.000714337	0.0181248	UP	no	NO
AT3G57450	0.542959	4.08403	0.000714636	0.0181248	UP	no	NO
AT4G39930	0.8636	0.638069	0.000720484	0.0182593	UP	no	NO
AT5G49530	0.343297	4.71952	0.000721545	0.0182716	UP	no	NO
AT1G58180	0.426872	6.74414	0.00072259	0.0182716	UP	no	NO
AT3G45740	0.394868	3.98049	0.000722595	0.0182716	UP	no	NO
AT3G29810	-0.747563	2.15578	0.000723285	0.0182753	DOWN	no	NO
AT5G48400	-1.36043	-0.99179	0.000727503	0.0183681	DOWN	no	NO
AT1G78550	0.472598	3.68392	0.000732885	0.0184782	UP	no	NO
AT1G33760	2.47851	-1.28382	0.000733164	0.0184782	UP	no	NO
AT2G28320	0.322315	5.40089	0.000733512	0.0184782	UP	no	NO
AT1G28570	-0.544676	3.16506	0.000734624	0.0184924	DOWN	no	NO
AT1G22650	0.5506	4.1513	0.000738311	0.0185714	UP	no	NO
AT5G02780	-2.46717	-0.468636	0.000740285	0.0186007	DOWN	no	NO
AT3G56360	1.44847	6.77491	0.000740582	0.0186007	UP	no	NO
AT2G41510	-1.16172	1.82854	0.000742108	0.0186251	DOWN	no	NO
AT3G10915	-0.390332	4.35143	0.000743911	0.0186565	DOWN	no	NO
AT1G09980	0.33036	5.3506	0.000748537	0.0187585	UP	no	NO
AT1G65250	-0.77327	0.548876	0.000750831	0.018802	DOWN	no	NO
AT1G17240	-1.07259	-0.374735	0.000752751	0.0188361	DOWN	no	NO
AT2G22890	0.61226	2.5164	0.000755409	0.0188817	UP	no	NO
AT3G28040	-0.388471	6.48112	0.000755694	0.0188817	DOWN	no	NO
AT1G04480	0.378803	6.4086	0.00076225	0.019014	UP	no	NO
AT1G70810	-0.52659	3.81055	0.000762643	0.019014	DOWN	no	NO
AT5G59520	-0.942822	3.58417	0.000762682	0.019014	DOWN	no	NO
AT1G27900	0.330618	4.76539	0.000763596	0.0190227	UP	no	NO
AT5G63800	-0.36616	7.39106	0.0007674	0.0191033	DOWN	no	NO
AT4G05330	0.535154	3.54377	0.000772873	0.0192089	UP	no	YES	4:2722525:A-G;intronic_variant
AT5G07870	0.412823	4.38022	0.00077302	0.0192089	UP	no	NO
AT4G01330	0.373225	6.57952	0.000773621	0.0192089	UP	no	NO
AT5G06820	0.979293	0.332783	0.000773924	0.0192089	UP	no	NO
AT1G03130	-0.31593	9.89442	0.000779388	0.0193303	DOWN	no	NO
AT5G62090	0.373503	6.22782	0.000780192	0.019336	UP	no	NO
AT1G09480	-0.741681	1.27796	0.000786739	0.0194839	DOWN	no	NO
AT5G37260	0.660118	3.34259	0.000789228	0.0195285	UP	no	NO
AT1G18980	-0.766477	2.7851	0.000789699	0.0195285	DOWN	no	NO
AT2G18260	0.569122	3.01701	0.000790959	0.0195453	UP	no	NO
AT2G33860	0.382016	5.32361	0.000791657	0.0195482	UP	no	NO
AT2G01730	0.858535	0.835757	0.000792981	0.0195666	UP	no	NO
AT2G26710	0.589046	3.31128	0.000802701	0.0197919	UP	no	NO
AT1G44780	0.498245	3.12449	0.00080462	0.0198247	UP	no	NO
AT2G14878	-0.524145	5.96613	0.000815381	0.0200752	DOWN	no	NO
AT1G22370	0.543982	5.11423	0.000816623	0.0200911	UP	no	NO
AT1G33610	0.624032	2.69788	0.00082046	0.0201628	UP	no	NO
AT4G22230	-2.21796	-0.487386	0.000820737	0.0201628	DOWN	no	NO
AT3G04820	0.432624	3.8512	0.000824866	0.0202495	UP	no	NO
AT3G59020	0.323811	6.30222	0.000827864	0.0203083	UP	no	NO
AT3G43670	-0.88977	5.96183	0.000836502	0.0205052	DOWN	no	NO
AT3G19380	0.607434	3.75886	0.000840741	0.0205923	UP	no	NO
AT5G51300	-0.328873	5.75909	0.000841274	0.0205923	DOWN	yes	NO
AT1G12440	0.312096	6.84654	0.000842352	0.0206037	UP	no	NO
AT2G39000	-0.315545	5.63242	0.000847133	0.0207056	DOWN	no	YES	2:16286332:C-T;exonic_variant
AT5G62680	-0.670429	5.88588	0.000851182	0.0207895	DOWN	no	NO
AT1G20515	-1.45248	-1.16563	0.000851897	0.0207918	DOWN	no	NO
AT1G80410	0.3008	6.84723	0.000854769	0.0208468	UP	no	NO
AT1G76080	-0.396059	8.01403	0.000857982	0.0209101	DOWN	no	NO
AT5G45250	-0.400719	3.95996	0.000861091	0.0209707	DOWN	no	NO
AT3G59080	0.84203	3.49944	0.000863262	0.0209988	UP	no	NO
AT1G72890	-0.553658	3.52029	0.000863496	0.0209988	DOWN	no	NO
AT1G80840	1.14288	3.95408	0.000868948	0.0211162	UP	no	NO
AT1G52343	0.884996	0.345782	0.000870801	0.021146	UP	no	NO
AT1G15100	-0.655236	3.38854	0.000875067	0.0212192	DOWN	no	NO
AT5G36120	-0.410636	4.55001	0.000875548	0.0212192	DOWN	no	NO
AT4G21430	0.379345	4.21488	0.000875709	0.0212192	UP	no	NO
AT2G18660	-3.28082	-0.346552	0.000876566	0.0212247	DOWN	no	NO
AT2G07707	1.22469	0.695114	0.000877882	0.0212413	UP	no	NO
AT4G32800	1.1022	1.14594	0.000882222	0.021331	UP	no	NO
AT1G76980	-0.715699	2.22524	0.000884948	0.0213816	DOWN	no	NO
AT5G03210	0.94427	3.44452	0.000885623	0.0213825	UP	no	NO
AT5G65140	0.562266	4.35631	0.000891434	0.0215075	UP	no	NO
AT5G44260	0.503623	6.95693	0.000896152	0.0216014	UP	no	NO
AT1G07840	0.395492	4.17326	0.000896611	0.0216014	UP	no	NO
AT2G05590	0.364456	4.23172	0.000899855	0.0216641	UP	no	NO
AT3G45100	0.38221	4.42324	0.000902382	0.0217094	UP	no	NO
AT1G08640	0.369259	6.5583	0.000908324	0.0218367	UP	no	NO
AT1G27880	0.694419	1.72226	0.000916474	0.0220149	UP	no	NO
AT1G64940	-1.42481	-1.25208	0.000917042	0.0220149	DOWN	no	NO
AT5G62910	0.374096	4.35571	0.000926754	0.0222322	UP	no	NO
AT5G20620	-0.31589	5.96968	0.000927574	0.022236	DOWN	no	NO
AT1G17960	0.886256	1.12727	0.000929512	0.0222666	UP	no	YES	1:6181512:T-TG;intronic_variant
AT2G28120	0.779834	4.67832	0.000935746	0.0224001	UP	no	NO
AT2G41240	5.88648	0.757041	0.000938301	0.0224453	UP	no	NO
AT4G01460	0.506338	4.93631	0.00094082	0.0224895	UP	no	NO
AT1G71050	-0.75948	1.79538	0.000945664	0.0225893	DOWN	no	NO
AT2G01422	0.849239	4.07196	0.000947915	0.0226141	UP	no	NO
AT4G14713	0.526372	2.954	0.000948047	0.0226141	UP	no	NO
AT1G50360	0.359042	4.93858	0.000957307	0.0228189	UP	no	NO
AT3G48810	-0.567593	2.41036	0.000959411	0.0228275	DOWN	no	NO
AT5G47540	0.328309	5.25313	0.000959642	0.0228275	UP	no	NO
AT5G22520	-3.46179	-2.92187	0.000959701	0.0228275	DOWN	no	NO
AT4G04770	-0.447712	7.59428	0.000961056	0.0228436	DOWN	no	NO
AT4G34410	2.28698	0.11735	0.000964907	0.0229189	UP	no	NO
AT3G54065	2.80536	-2.16223	0.000967343	0.0229606	UP	no	NO
AT2G47770	1.36006	3.76988	0.000969238	0.0229787	UP	no	NO
AT1G17745	-1.0482	4.50191	0.000970087	0.0229787	DOWN	no	NO
AT1G56120	0.710664	2.0117	0.000970154	0.0229787	UP	no	NO
AT1G13360	-0.383554	6.13324	0.00097361	0.0230444	DOWN	no	NO
AT3G49920	0.580997	2.5522	0.00097695	0.0231072	UP	no	NO
AT5G04320	0.401194	4.15482	0.000978588	0.0231297	UP	no	NO
AT4G37240	0.868607	1.43911	0.000979699	0.0231397	UP	no	NO
AT1G31500	0.373511	4.19399	0.000980794	0.0231493	UP	no	NO
AT1G32240	-0.535436	2.98343	0.000984724	0.0232112	DOWN	no	NO
AT4G03060	-1.5453	2.51122	0.000985222	0.0232112	DOWN	no	NO
AT4G30530	-0.667975	6.49336	0.00098548	0.0232112	DOWN	no	NO
AT4G03205	-0.441521	4.27065	0.000986988	0.0232304	DOWN	no	NO
AT4G08390	-0.465639	6.17189	0.000988072	0.0232397	DOWN	no	NO
AT3G16400	-0.545106	8.56356	0.000990422	0.0232787	DOWN	no	NO
AT1G16170	0.3653	4.6217	0.000992453	0.0233102	UP	no	NO
AT1G62180	-0.61058	6.51624	0.000993886	0.0233276	DOWN	no	NO
AT3G01160	0.419358	4.11922	0.00099625	0.0233545	UP	no	NO
AT1G23290	0.383764	6.94106	0.00099748	0.0233545	UP	no	NO
AT3G04760	-0.331107	6.13903	0.000997563	0.0233545	DOWN	no	NO
AT5G06670	0.335811	4.75667	0.000997805	0.0233545	UP	no	NO
AT5G13100	0.358191	5.6641	0.000998894	0.0233637	UP	no	NO
AT2G03640	0.335209	6.22943	0.00100049	0.0233849	UP	no	NO
AT1G01420	-0.527271	3.41034	0.00100126	0.0233865	DOWN	no	NO
AT5G64370	-0.410419	5.09634	0.0010041	0.0234366	DOWN	no	NO
AT2G37990	0.368024	4.58419	0.00100604	0.0234428	UP	no	NO
AT1G01070	-0.761083	2.70048	0.00100635	0.0234428	DOWN	no	NO
AT3G59320	-0.524743	3.61233	0.00100645	0.0234428	DOWN	no	NO
AT4G22212	-1.70516	0.930884	0.00100999	0.0235064	DOWN	no	NO
AT5G01500	-0.656179	2.94355	0.00101058	0.0235064	DOWN	no	NO
AT5G65710	-0.632472	2.4032	0.00101437	0.0235544	DOWN	no	NO
AT3G48850	-2.73239	-1.2338	0.00101446	0.0235544	DOWN	no	NO
AT1G73710	-0.356408	4.44867	0.00101474	0.0235544	DOWN	no	NO
AT4G12290	-0.947503	3.61603	0.00101594	0.023566	DOWN	no	YES	4:7304255:AC-A;exonic_variant,4:7304330:CG-C;exonic_variant,4:7304279:AT-A;exonic_variant
AT2G28150	0.344171	4.92757	0.00101772	0.023591	UP	no	NO
AT4G12690	0.504589	3.66727	0.00103127	0.0238887	UP	no	NO
AT4G08150	0.743037	3.77564	0.00103319	0.023902	UP	no	NO
AT1G35320	-0.508183	3.55036	0.00103326	0.023902	DOWN	no	NO
AT2G14247	4.61349	1.40754	0.00103901	0.0240177	UP	no	NO
AT4G27390	-0.381675	4.73983	0.00103969	0.0240177	DOWN	no	NO
AT1G47250	0.372076	4.52189	0.00104371	0.0240813	UP	no	NO
AT1G29195	-0.908849	0.591812	0.00104414	0.0240813	DOWN	no	NO
AT5G18370	-0.653776	2.87573	0.00104459	0.0240813	DOWN	no	NO
AT1G17250	-1.61021	-1.64139	0.0010466	0.0241111	DOWN	no	NO
AT1G15750	0.316904	7.42395	0.00104784	0.0241233	UP	no	NO
AT5G28145	0.855077	0.424754	0.00105024	0.0241619	UP	no	YES	5:10130863:C-T;exonic_variant
AT1G62130	0.413054	3.65825	0.00105272	0.0242026	UP	no	NO
AT1G62200	-0.407965	4.46705	0.00106109	0.0243666	DOWN	no	NO
AT5G07460	-0.967572	3.89052	0.0010625	0.0243666	DOWN	no	NO
AT4G08555	-2.19997	0.766143	0.00106256	0.0243666	DOWN	no	NO
AT1G33400	0.335084	4.56306	0.00106275	0.0243666	UP	no	NO
AT4G37610	0.980042	5.21745	0.00106398	0.0243781	UP	no	NO
AT4G13150	-0.339412	4.62816	0.00107056	0.0245122	DOWN	no	NO
AT3G24515	0.604919	2.22483	0.00107736	0.0246512	UP	no	NO
AT4G00955	-1.05305	-0.131563	0.00108155	0.0247302	DOWN	no	NO
AT4G26110	0.397312	6.65532	0.00108272	0.0247401	UP	no	NO
AT4G04610	-0.968615	5.46327	0.00108491	0.0247723	DOWN	no	NO
AT1G61560	-1.1323	1.95343	0.00108582	0.0247723	DOWN	no	NO
AT2G31400	-0.305183	8.09746	0.00108633	0.0247723	DOWN	no	NO
AT4G32520	0.381537	6.14303	0.00108858	0.0248043	UP	no	YES	4:15692443:AATAT-A;intronic_variant
AT1G61190	-0.394102	6.05271	0.00108921	0.0248043	DOWN	no	NO
AT4G17250	0.46364	4.72888	0.00109293	0.0248722	UP	no	NO
AT4G17150	0.3875	4.41932	0.00109809	0.024965	UP	no	NO
AT2G31190	0.374243	4.27577	0.00109849	0.024965	UP	no	NO
AT1G20030	0.65679	3.53113	0.00110505	0.0250972	UP	no	NO
AT1G75490	0.697596	4.29456	0.00110781	0.025143	UP	no	NO
AT3G21805	-0.702573	1.88486	0.00111167	0.0252135	DOWN	no	NO
AT2G14750	-0.693048	5.78471	0.00111632	0.0253003	DOWN	no	NO
AT1G53310	-0.493898	6.49897	0.00111699	0.0253003	DOWN	no	NO
AT4G34650	0.652626	4.42535	0.00112077	0.0253688	UP	no	NO
AT1G11210	0.666225	4.47548	0.00112164	0.0253714	UP	no	NO
AT5G62600	0.328108	4.89437	0.00112442	0.0254172	UP	no	NO
AT4G14130	1.19368	5.93926	0.00113737	0.0256911	UP	no	NO
AT1G55530	0.351923	5.19887	0.00113806	0.0256911	UP	no	NO
AT3G61080	-0.301001	5.38333	0.00113971	0.0257111	DOWN	no	NO
AT2G17580	0.386237	3.83784	0.00114641	0.0258297	UP	no	NO
AT2G40955	1.09999	0.458282	0.0011465	0.0258297	UP	no	NO
AT5G64680	0.622537	3.0612	0.0011473	0.0258303	UP	no	NO
AT3G27530	0.292986	6.12144	0.00115435	0.0259718	UP	no	NO
AT3G47610	0.343596	4.57659	0.00115871	0.0260364	UP	no	NO
AT2G26190	0.432436	4.94079	0.00115877	0.0260364	UP	no	NO
AT5G41690	0.541435	3.16304	0.00116062	0.0260606	UP	no	NO
AT3G20780	0.391575	3.72529	0.00116317	0.0261003	UP	no	NO
AT5G24655	-1.51894	-0.307455	0.00116569	0.0261305	DOWN	no	NO
AT1G78940	-0.858377	0.667686	0.00116606	0.0261305	DOWN	no	NO
AT4G01060	0.772773	2.94954	0.00117063	0.0262154	UP	no	NO
AT1G77450	0.687264	4.19312	0.00117271	0.0262445	UP	no	NO
AT1G44542	-3.82098	-3.02967	0.00117512	0.0262724	DOWN	no	NO
AT2G36900	0.35208	4.92206	0.0011762	0.0262724	UP	no	NO
AT5G42600	-1.81574	2.97838	0.00117629	0.0262724	DOWN	no	YES	5:17054333:GATAT-G;intronic_variant
AT1G61120	-5.1012	0.0122172	0.0011872	0.0264985	DOWN	no	NO
AT4G02520	-1.17549	6.8425	0.00119052	0.0265549	DOWN	no	NO
AT1G59960	-0.747484	3.10149	0.00119169	0.0265633	DOWN	no	NO
AT5G06060	-0.306644	5.69023	0.00119618	0.0266305	DOWN	no	NO
AT4G12750	0.461641	3.61102	0.00119628	0.0266305	UP	no	NO
AT4G01740	-0.753313	1.58881	0.00120018	0.0266828	DOWN	no	NO
AT1G69610	-0.550006	3.56105	0.00120021	0.0266828	DOWN	no	NO
AT2G33330	-0.410761	3.73513	0.00120434	0.0267569	DOWN	no	NO
AT5G37830	-0.314809	5.90686	0.00120771	0.0268141	DOWN	no	NO
AT3G26170	-0.457627	4.50309	0.00120959	0.026838	DOWN	no	NO
AT4G13850	0.432303	6.36314	0.00121678	0.0269798	UP	no	NO
AT3G56830	0.421622	3.33939	0.00121903	0.027012	UP	no	NO
AT1G68720	-0.323035	5.58706	0.00122229	0.0270665	DOWN	no	NO
AT2G47060	0.388313	5.06936	0.00122318	0.0270683	UP	no	NO
AT2G32660	-1.20174	-0.114602	0.00122863	0.027171	DOWN	no	NO
AT5G01670	0.395857	4.00226	0.00123203	0.0272284	UP	no	NO
AT3G22190	0.330686	5.27719	0.00123359	0.027245	UP	no	NO
AT2G19480	0.313189	7.00665	0.00123466	0.0272507	UP	no	NO
AT3G13790	-0.852983	3.83725	0.00123619	0.0272666	DOWN	no	NO
AT5G04600	0.347573	5.54335	0.00123894	0.0272964	UP	no	NO
AT2G33550	-0.533373	3.23565	0.00123916	0.0272964	DOWN	no	NO
AT5G15950	-2.34412	-1.16522	0.00124034	0.0272978	DOWN	no	NO
AT3G60690	-0.439632	4.26444	0.00124085	0.0272978	DOWN	no	NO
AT5G23395	0.489216	3.15772	0.00124394	0.027348	UP	no	YES	5:7875940:CA-C;intronic_variant
AT1G24148	-0.420508	5.09021	0.00124569	0.0273531	DOWN	no	NO
AT3G06670	0.291492	6.71318	0.00124579	0.0273531	UP	no	NO
AT5G45570	0.978649	-0.342408	0.00124727	0.0273677	UP	no	NO
AT1G64660	0.42182	7.25358	0.00124846	0.0273682	UP	no	NO
AT5G58150	-0.564196	2.90563	0.00124892	0.0273682	DOWN	no	NO
AT2G19250	-0.505392	3.24131	0.00126018	0.0275969	DOWN	no	NO
AT1G54000	-1.66388	4.28852	0.00126322	0.0276455	DOWN	no	NO
AT2G38860	-0.747018	3.9427	0.0012665	0.0276942	DOWN	no	NO
AT3G22235	-2.64875	0.330409	0.00126768	0.0276942	DOWN	no	NO
AT5G24470	0.594923	3.5686	0.00126791	0.0276942	UP	no	NO
AT1G69270	0.549224	4.60754	0.00127908	0.02792	UP	no	NO
AT2G03530	-0.461759	4.08343	0.00129051	0.0281514	DOWN	no	NO
AT3G19230	-1.47616	-1.3548	0.00129143	0.0281531	DOWN	no	NO
AT5G03350	-1.15624	1.42015	0.00129471	0.0282065	DOWN	no	NO
AT4G33120	-1.88377	1.43814	0.00129558	0.028207	DOWN	no	NO
AT5G24060	0.340996	5.23027	0.00129874	0.0282577	UP	no	NO
AT5G49690	0.69963	3.76174	0.00130193	0.0283087	UP	no	NO
AT3G24500	0.912162	3.88751	0.00130366	0.0283281	UP	no	NO
AT5G37590	0.472637	3.53379	0.00130563	0.0283342	UP	no	NO
AT2G20835	1.01368	0.849691	0.00130565	0.0283342	UP	no	NO
AT1G78100	-0.476828	4.65668	0.00130646	0.0283342	DOWN	no	NO
AT4G14368	-5.02171	-3.56764	0.00130863	0.0283552	DOWN	no	NO
AT2G37950	0.877187	1.25736	0.00130912	0.0283552	UP	no	NO
AT5G22890	-0.878863	2.47761	0.00131441	0.0284515	DOWN	no	NO
AT1G60860	0.388801	4.85866	0.00132302	0.0285989	UP	no	YES	1:22404963:C-T;protein_coding;missense;GAA>AAA;E>K,1:22404963:C-T;intronic_variant,1:22404963:C-T;exonic_variant
AT4G13430	-0.388255	7.95093	0.00132307	0.0285989	DOWN	no	NO
AT3G15950	-0.597352	7.19165	0.00132425	0.0285989	DOWN	no	NO
AT3G02020	-1.27987	5.61608	0.00132461	0.0285989	DOWN	no	NO
AT4G37520	-0.658006	4.97116	0.00132714	0.0286351	DOWN	no	NO
AT2G25840	0.312439	5.43099	0.00132892	0.0286551	UP	no	NO
AT2G25510	-0.683864	5.02011	0.00133382	0.0287424	DOWN	no	NO
AT1G27910	-0.389233	4.03631	0.00133545	0.0287592	DOWN	no	NO
AT5G35940	-2.71737	1.37277	0.00133991	0.0288275	DOWN	no	NO
AT1G62380	-0.513621	9.74577	0.00134039	0.0288275	DOWN	no	NO
AT1G51402	1.33975	-0.984752	0.00134119	0.0288275	UP	no	NO
AT4G37190	0.412629	4.19434	0.00134251	0.0288374	UP	no	NO
AT2G31790	-0.336031	5.81313	0.00134344	0.028839	DOWN	no	NO
AT2G32440	-0.367837	5.1627	0.00134589	0.0288605	DOWN	no	NO
AT1G66880	-0.652892	3.42958	0.00134616	0.0288605	DOWN	no	NO
AT4G25900	-0.500423	4.39938	0.00134874	0.0288976	DOWN	no	NO
AT4G39360	1.4086	-0.689929	0.00135073	0.0289217	UP	no	NO
AT4G25835	0.533221	4.01576	0.00135199	0.0289304	UP	no	NO
AT5G38530	-0.488521	4.77863	0.00135584	0.0289944	DOWN	no	NO
AT3G27400	-0.725638	1.57539	0.00135784	0.0290186	DOWN	no	NO
AT2G45960	-0.292598	10.2361	0.0013587	0.0290186	DOWN	no	NO
AT5G10180	-0.646037	6.7717	0.00136004	0.0290288	DOWN	no	NO
AT3G49120	-0.595321	5.6998	0.00136168	0.0290454	DOWN	no	NO
AT2G43150	-0.961257	6.41489	0.00136319	0.0290592	DOWN	no	YES	2:17946246:T-C;protein_coding;sense;CCT>CCC;P>P,2:17946222:T-C;protein_coding;sense;CCT>CCC;P>P,2:17946189:C-T;protein_coding;sense;TCC>TCT;S>S,2:17946228:G-A;protein_coding;sense;CCG>CCA;P>P,2:17946285:C-T;protein_coding;sense;TCC>TCT;S>S,2:17946282:A-G;protein_coding;sense;AAA>AAG;K>K,2:17946267:A-G;protein_coding;sense;CCA>CCG;P>P
AT1G55860	-0.370548	7.01646	0.00136407	0.0290596	DOWN	no	NO
AT5G11710	0.291894	6.66627	0.00136597	0.0290817	UP	no	NO
AT3G28945	-0.931621	0.849943	0.00136714	0.0290882	DOWN	no	NO
AT2G32487	-1.43223	0.665675	0.00137429	0.0292218	DOWN	no	NO
AT1G47520	0.495351	3.89442	0.00138059	0.0293373	UP	no	NO
AT1G14430	-0.922181	1.24613	0.00138609	0.0294236	DOWN	no	NO
AT1G02610	0.78426	4.82798	0.0013864	0.0294236	UP	no	NO
AT2G39890	-0.497562	4.06068	0.00138915	0.0294634	DOWN	no	NO
AT5G20480	-0.732384	2.20856	0.00139307	0.0294771	DOWN	no	NO
AT1G49840	0.41002	3.95017	0.0013932	0.0294771	UP	no	NO
AT1G66800	-1.87669	0.295169	0.00139323	0.0294771	DOWN	no	YES	1:24925160:C-T;protein_coding;missense;CTT>TTT;L>F
AT2G28600	0.375636	3.96603	0.00139538	0.0294771	UP	no	NO
AT2G34960	-1.30594	-0.362193	0.00139607	0.0294771	DOWN	no	NO
AT1G70985	-0.890459	0.939697	0.00139644	0.0294771	DOWN	no	NO
AT5G49448	0.666433	6.29706	0.00139654	0.0294771	UP	no	NO
AT5G65870	-0.649638	2.99845	0.0013968	0.0294771	DOWN	no	NO
AT2G04270	0.29569	5.85562	0.00139829	0.0294901	UP	no	NO
AT4G01480	-0.80183	4.48334	0.00139932	0.0294933	DOWN	no	NO
AT1G11303	0.51638	3.26868	0.00140204	0.0295323	UP	no	NO
AT4G35240	0.382684	4.35858	0.00140341	0.0295426	UP	no	NO
AT4G26810	0.692761	1.37845	0.00140452	0.0295476	UP	no	NO
AT1G20200	0.310691	5.74919	0.00141829	0.0298185	UP	no	NO
AT2G47485	0.561461	2.69662	0.0014279	0.0299896	UP	no	NO
AT5G63580	-0.81843	1.23414	0.0014282	0.0299896	DOWN	no	NO
AT5G24660	-1.31817	2.71585	0.00143051	0.0300192	DOWN	no	NO
AT5G04150	3.49078	1.87977	0.00143169	0.0300254	UP	no	NO
AT5G49550	0.454855	3.22421	0.00143871	0.0301536	UP	no	NO
AT4G27470	-0.399956	4.17469	0.00143959	0.0301536	DOWN	no	NO
AT2G01350	-0.311452	5.70734	0.00144393	0.0302256	DOWN	no	NO
AT1G70320	-0.341612	7.58457	0.00144743	0.0302801	DOWN	no	NO
AT2G36835	0.422158	5.62247	0.0014496	0.0303066	UP	no	YES	2:15451164:C-T;splice_donor_region_variant
AT3G04000	-0.587082	3.63827	0.00145426	0.0303708	DOWN	no	NO
AT5G43840	1.66264	5.49034	0.0014548	0.0303708	UP	no	NO
AT4G37250	0.351898	4.75349	0.00145538	0.0303708	UP	no	NO
AT5G07770	-0.622983	2.76764	0.00145644	0.0303741	DOWN	no	NO
AT1G22400	-0.793223	3.23758	0.00145974	0.0304242	DOWN	no	NO
AT3G56200	-0.69088	4.22905	0.0014639	0.0304921	DOWN	no	NO
AT5G50530	0.365058	4.89059	0.00146506	0.0304973	UP	no	NO
AT1G67690	0.414083	3.50461	0.00147578	0.0306823	UP	no	NO
AT5G59220	0.957891	5.82733	0.00147645	0.0306823	UP	no	NO
AT3G53530	0.49281	3.6437	0.00147668	0.0306823	UP	no	NO
AT5G55600	-0.336725	5.47426	0.0014806	0.0307448	DOWN	no	NO
AT3G22150	-0.31055	5.85726	0.00148259	0.0307672	DOWN	no	NO
AT2G46240	0.538582	3.85729	0.00148918	0.0308849	UP	no	NO
AT1G23730	-1.35914	4.15212	0.00149197	0.0309238	DOWN	no	NO
AT2G23200	-0.467678	3.87311	0.00149305	0.030927	DOWN	no	NO
AT1G21440	-0.572973	5.55797	0.0014979	0.0310063	DOWN	no	NO
AT3G27020	-0.321808	6.30718	0.00149872	0.0310063	DOWN	no	NO
AT1G52360	0.323005	6.64764	0.00150169	0.0310444	UP	no	NO
AT3G05650	-0.950754	1.56362	0.0015024	0.0310444	DOWN	no	NO
AT1G18660	0.298914	6.27748	0.00150807	0.0311424	UP	no	NO
AT4G10600	-0.719447	0.792724	0.00151054	0.0311618	DOWN	no	NO
AT4G29130	0.339711	5.70276	0.00151086	0.0311618	UP	no	NO
AT5G25780	0.3384	5.03513	0.00151451	0.031218	UP	no	NO
AT1G33600	-0.438511	5.11122	0.00151833	0.0312775	DOWN	no	YES	1:12181497:C-T;protein_coding;missense;TCC>TTC;S>F,1:12182360:AG-A;intronic_variant
AT5G67450	0.921006	0.627959	0.00152516	0.031399	UP	no	NO
AT1G61600	-0.714579	1.84188	0.00152671	0.0314119	DOWN	no	NO
AT3G56970	5.56887	0.59623	0.00152857	0.0314309	UP	no	NO
AT3G18295	0.529383	2.87504	0.00153145	0.0314708	UP	no	NO
AT3G26200	-1.5221	1.14026	0.00153295	0.0314826	DOWN	no	NO
AT3G51180	-0.822874	1.17314	0.00153715	0.0315442	DOWN	no	YES	3:19013922:GT-G;intronic_variant
AT3G52060	0.438229	6.9388	0.00153801	0.0315442	UP	no	NO
AT2G28210	-3.01899	-1.30815	0.00153906	0.0315442	DOWN	no	NO
AT5G07690	-0.722244	3.60804	0.00154048	0.0315442	DOWN	no	NO
AT4G18650	1.60007	2.45468	0.00154098	0.0315442	UP	no	NO
AT4G18205	-0.701041	2.96066	0.00154157	0.0315442	DOWN	no	NO
AT5G37720	0.34862	5.71611	0.00154622	0.03162	UP	no	NO
AT2G37470	0.345418	5.07971	0.00154785	0.0316342	UP	no	NO
AT1G12730	0.455792	3.18239	0.00154997	0.0316584	UP	no	NO
AT1G60430	0.382873	3.83382	0.00155131	0.0316666	UP	no	NO
AT1G63350	-0.771479	1.58284	0.00155581	0.031739	DOWN	no	NO
AT5G26850	0.431364	6.13868	0.00156043	0.0318031	UP	no	NO
AT4G06534	0.783855	2.99606	0.00156132	0.0318031	UP	no	NO
AT4G26400	0.359291	5.15423	0.00156224	0.0318031	UP	no	NO
AT1G33720	-1.05715	-0.199362	0.00156273	0.0318031	DOWN	no	NO
AT5G06350	0.329471	4.53904	0.00156466	0.0318233	UP	no	NO
AT4G31210	0.453471	4.66202	0.00156874	0.0318772	UP	no	NO
AT2G45510	-0.693225	3.91758	0.00156921	0.0318772	DOWN	no	NO
AT3G11720	0.452489	4.06986	0.00157094	0.0318933	UP	no	NO
AT3G48260	0.848354	2.49969	0.0015756	0.0319686	UP	no	NO
AT3G12630	0.291883	6.75203	0.00157952	0.0320288	UP	no	NO
AT5G01870	-1.51345	3.29577	0.00158124	0.032029	DOWN	no	NO
AT5G62470	0.457115	4.81446	0.00158143	0.032029	UP	no	NO
AT3G59140	-0.821054	4.26317	0.00158352	0.032052	DOWN	no	NO
AT1G12650	0.366357	4.34918	0.00158707	0.0321046	UP	no	NO
AT4G05380	2.30205	-1.98267	0.00158833	0.0321107	UP	no	NO
AT1G78150	0.316727	6.22517	0.00159055	0.0321364	UP	no	NO
AT1G70780	0.363859	6.94765	0.00159741	0.0322557	UP	no	NO
AT1G68320	-1.24783	0.895129	0.0015992	0.0322723	DOWN	no	NO
AT2G01390	0.645311	1.67107	0.00160674	0.0324052	UP	no	NO
AT3G24463	1.41688	3.08935	0.00161252	0.0325022	UP	no	NO
AT3G46820	-0.371984	4.33342	0.00161462	0.0325251	DOWN	yes	NO
AT5G47830	0.469951	3.25881	0.00161609	0.0325352	UP	no	NO
AT3G41979	0.376346	11.0881	0.00162085	0.0326047	UP	no	YES	3:14204108:A-AAATGATGGATGAAACACAAG;exonic_variant,3:14203851:CTTGTTCAAAAAGAAACAGAAGAGAATGCTTGGGGTTACACTCACGAAGGTGCATAGTGAGAAGAGTAAGTCAAGAGAT-C;exonic_variant,3:14204877:AC-A;intronic_variant,3:14204891:A-AGAAAAAT;intronic_variant,3:14204882:G-GA;intronic_variant,3:14204107:A-ATC;exonic_variant,3:14204892:C-CTAT;intronic_variant,3:14203843:GAGAT-G;exonic_variant
AT2G04160	-0.494407	5.87168	0.00162184	0.0326047	DOWN	no	NO
AT1G15800	0.508723	3.3995	0.00162244	0.0326047	UP	no	NO
AT4G26610	0.332614	5.11996	0.00162884	0.0327137	UP	no	NO
AT2G29460	-1.74878	1.91937	0.00163125	0.0327426	DOWN	no	YES	2:12627065:G-A;intronic_variant
AT4G09250	-0.880389	2.6798	0.00163414	0.0327748	DOWN	no	NO
AT5G43440	-0.465583	5.65224	0.00163556	0.0327748	DOWN	no	NO
AT1G25145	0.422145	4.38345	0.00163577	0.0327748	UP	no	NO
AT2G12020	-1.80552	-2.10994	0.00163706	0.0327805	DOWN	no	NO
AT5G45750	0.459243	4.59695	0.001638	0.0327805	UP	no	NO
AT1G66910	-0.470085	3.77417	0.0016446	0.0328929	DOWN	no	NO
AT1G31290	0.526792	3.78267	0.00164922	0.0329607	UP	no	NO
AT5G13800	-0.454828	6.53933	0.00164994	0.0329607	DOWN	no	NO
AT5G19440	-0.47536	5.45583	0.00165497	0.0330291	DOWN	no	NO
AT5G40990	-7.33638	-2.5395	0.00165533	0.0330291	DOWN	no	NO
AT1G30860	-1.1913	-0.110904	0.00166195	0.0331338	DOWN	no	NO
AT5G11010	0.39481	4.07313	0.00166254	0.0331338	UP	no	NO
AT2G24160	-0.76241	2.46192	0.00166706	0.033189	DOWN	no	NO
AT2G41160	0.334332	4.57899	0.00166729	0.033189	UP	no	NO
AT3G21020	-0.867043	0.0734758	0.00166837	0.0331905	DOWN	no	NO
AT5G26622	-0.333003	4.75461	0.00166991	0.0331905	DOWN	no	NO
AT5G57320	0.519138	2.6556	0.00167032	0.0331905	UP	no	NO
AT1G10870	0.316142	5.09961	0.00167792	0.0333219	UP	no	NO
AT3G16710	0.625071	2.30929	0.00168388	0.0334206	UP	no	NO
AT1G77960	0.935903	2.82541	0.0016901	0.0335039	UP	no	NO
AT5G17490	0.749151	2.78376	0.00169102	0.0335039	UP	no	YES	5:5764825:C-T;protein_coding;missense;GAG>AAG;E>K
AT5G16750	0.412822	4.17053	0.00169127	0.0335039	UP	no	NO
AT1G75830	-5.07674	-1.7408	0.00169206	0.0335039	DOWN	no	NO
AT5G60410	0.291308	6.746	0.00169669	0.033576	UP	no	NO
AT4G21320	0.725758	3.73123	0.00170271	0.0336752	UP	no	YES	4:11340774:G-A;protein_coding;missense;GGA>GAA;G>E
AT5G11350	0.335906	4.43422	0.00170932	0.0337862	UP	no	NO
AT5G05200	-0.339403	7.18976	0.00171558	0.03389	DOWN	no	NO
AT1G74680	-0.382985	4.03026	0.00172143	0.0339857	DOWN	no	NO
AT3G19660	-0.689515	1.73279	0.00172353	0.0340072	DOWN	no	NO
AT1G76560	0.509569	3.55098	0.00172675	0.0340478	UP	no	NO
AT3G16830	0.322667	6.53853	0.00172761	0.0340478	UP	no	NO
AT2G14520	0.736244	1.92936	0.00173425	0.0341586	UP	no	NO
AT2G35020	-0.374246	4.7986	0.00173892	0.0342307	DOWN	no	NO
AT4G22840	-0.50595	3.06492	0.00174757	0.0343807	DOWN	no	NO
AT1G07900	1.38536	-0.65654	0.00175046	0.0344175	UP	no	NO
AT1G54170	0.326476	5.28448	0.00175155	0.0344189	UP	no	NO
AT3G14595	0.35641	6.59792	0.00176106	0.0345855	UP	no	NO
AT5G40382	1.21042	0.273007	0.00176525	0.0346477	UP	no	NO
AT4G39030	-0.967598	1.32956	0.00177567	0.0348319	DOWN	no	NO
AT1G59870	-0.587779	7.80389	0.00177875	0.034872	DOWN	no	NO
AT2G02850	-0.838136	1.28385	0.00179089	0.0350896	DOWN	no	NO
AT3G25600	0.535071	3.3698	0.00179221	0.0350949	UP	no	NO
AT5G63250	2.18376	-1.39723	0.00179721	0.0351724	UP	no	NO
AT1G26210	-0.507616	3.77642	0.00180071	0.0352082	DOWN	no	NO
AT1G43590	0.816501	1.55317	0.00180113	0.0352082	UP	no	YES	1:16414186:A-T;exonic_variant,1:16414197:C-T;intronic_variant,1:16414192:G-A;intronic_variant,1:16414206:A-T;intronic_variant,1:16414197:C-T;exonic_variant,1:16414186:A-T;intronic_variant,1:16414192:G-A;exonic_variant,1:16414206:A-T;exonic_variant
AT2G01880	-1.68171	1.64836	0.00181464	0.0354517	DOWN	no	NO
AT4G27830	-0.461415	5.78805	0.00182699	0.0356724	DOWN	no	NO
AT5G64340	-0.291894	6.17162	0.00182809	0.0356731	DOWN	no	NO
AT4G31300	0.289908	6.31121	0.00183859	0.0358574	UP	no	NO
AT5G48490	0.42366	6.4233	0.00184192	0.0359014	UP	no	NO
AT2G18700	0.692981	7.42088	0.001845	0.0359224	UP	no	NO
AT3G17205	0.313776	5.92588	0.00184513	0.0359224	UP	no	YES	3:5879800:C-CT;intronic_variant
AT4G19006	0.327322	4.79736	0.00184698	0.0359377	UP	no	NO
AT2G07777	0.842316	1.38578	0.00184915	0.0359592	UP	no	NO
AT4G37050	2.7539	-2.04534	0.00185812	0.0361126	UP	no	NO
AT4G15560	-0.291735	9.76112	0.00186578	0.0362407	DOWN	no	NO
AT4G21280	-0.293461	9.62187	0.00186873	0.0362771	DOWN	no	NO
AT5G50110	0.411996	3.61995	0.00187202	0.0363083	UP	no	NO
AT5G45410	-0.357845	5.89943	0.00187249	0.0363083	DOWN	no	NO
AT4G37410	-0.949343	5.78627	0.00187418	0.03632	DOWN	no	NO
AT1G54010	-0.753111	5.1885	0.00187889	0.0363903	DOWN	no	NO
AT1G49430	0.320051	5.39467	0.00189136	0.0366109	UP	no	NO
AT1G51140	0.576398	5.5817	0.0018927	0.0366157	UP	no	YES	1:18945076:T-TTC;intronic_variant
AT1G10730	0.526337	3.06091	0.00189495	0.0366382	UP	no	NO
AT1G10810	-1.41127	-1.52994	0.00190574	0.0368257	DOWN	no	NO
AT5G42970	0.323209	4.62598	0.00190794	0.0368352	UP	no	NO
AT5G48950	-1.02354	-0.233602	0.00190842	0.0368352	DOWN	no	NO
AT2G04400	-0.348538	5.00547	0.00191221	0.0368872	DOWN	no	NO
AT2G19130	-0.554239	3.02406	0.00191788	0.0369755	DOWN	no	NO
AT3G43800	-0.496563	4.906	0.00192338	0.0370602	DOWN	no	NO
AT1G77460	-0.571108	3.46752	0.00193084	0.0371828	DOWN	no	NO
AT3G63240	0.395899	3.76091	0.00194167	0.0373699	UP	no	NO
AT2G38610	0.339504	4.94631	0.00195039	0.0375164	UP	no	NO
AT5G28060	0.340746	7.82729	0.00195462	0.0375651	UP	no	NO
AT1G70230	-0.39729	4.61153	0.00195516	0.0375651	DOWN	no	NO
AT2G43460	0.371379	6.79882	0.00195917	0.0376208	UP	no	NO
AT3G54460	-0.333627	5.51918	0.00196197	0.0376351	DOWN	no	NO
AT1G17940	0.376107	4.42829	0.00196271	0.0376351	UP	no	NO
AT3G51430	-0.606872	4.87208	0.00196327	0.0376351	DOWN	no	YES	3:19086746:C-T;protein_coding;missense;CTC>TTC;L>F
AT1G73390	0.440988	6.08942	0.00197	0.0377426	UP	no	NO
AT1G55120	-0.866946	1.95176	0.00197118	0.0377438	DOWN	no	NO
AT1G16489	-0.65265	1.25722	0.00197507	0.0377967	DOWN	no	NO
AT1G23940	0.683121	1.16783	0.00198784	0.0380196	UP	no	NO
AT5G45760	-0.380931	3.88594	0.00199038	0.0380466	DOWN	no	NO
AT5G36790	-7.21888	-0.471532	0.00200318	0.0382695	DOWN	no	NO
AT1G66300	-5.00452	-3.59626	0.0020087	0.0383533	DOWN	no	NO
AT3G09840	0.282516	8.72128	0.00201633	0.0384649	UP	no	NO
AT5G37475	0.323724	4.98379	0.00201684	0.0384649	UP	no	NO
AT5G01780	0.378399	4.27414	0.00203317	0.0387545	UP	no	NO
AT1G54575	-0.513344	5.62251	0.00203896	0.0388429	DOWN	no	NO
AT2G13410	2.43297	-2.28484	0.0020417	0.038873	UP	no	NO
AT3G25830	-0.88364	6.49374	0.00204408	0.0388964	DOWN	no	NO
AT3G04140	-0.500374	3.92626	0.00204607	0.0389123	DOWN	no	NO
AT3G25225	2.79647	-3.03103	0.00204746	0.0389168	UP	no	NO
AT5G23050	0.430882	5.57317	0.00205232	0.0389871	UP	no	NO
AT5G39020	-1.00194	1.29905	0.00205615	0.0390221	DOWN	no	NO
AT1G64065	0.72034	1.37849	0.00205648	0.0390221	UP	no	NO
AT5G25800	0.470694	3.22338	0.00206937	0.0392447	UP	no	NO
AT1G03090	0.633987	7.35262	0.00207748	0.0393763	UP	no	NO
AT5G31702	4.95329	-3.3718	0.0020859	0.0395136	UP	no	NO
AT5G47390	0.399758	6.06392	0.00209465	0.0396571	UP	no	NO
AT5G48540	-0.661181	2.90079	0.00209978	0.0397318	DOWN	no	NO
AT4G18930	-0.476685	4.41695	0.00210619	0.0398194	DOWN	no	NO
AT5G67300	0.742495	6.76846	0.00210677	0.0398194	UP	no	NO
AT1G33590	-0.431986	6.13227	0.0021138	0.0399053	DOWN	no	NO
AT2G38240	-3.62708	-1.15337	0.00211482	0.0399053	DOWN	no	NO
AT2G26540	-0.316961	5.12261	0.00211487	0.0399053	DOWN	no	NO
AT1G10840	0.30718	6.77953	0.00211976	0.0399751	UP	no	NO
AT1G53885	1.26503	4.98223	0.00213009	0.0401475	UP	no	NO
AT4G37180	0.329444	6.64753	0.00213399	0.0401986	UP	no	YES	4:17504674:G-A;protein_coding;sense;AGG>AGA;R>R
AT1G61900	0.307585	5.4279	0.00213754	0.0402429	UP	no	NO
AT4G36260	-0.586703	1.86952	0.00213999	0.0402664	DOWN	no	NO
AT2G25100	0.395123	3.77542	0.00214547	0.040347	UP	no	NO
AT2G36220	0.346842	5.13716	0.00215374	0.0404782	UP	no	NO
AT1G71380	-1.24852	-0.622065	0.00215485	0.0404782	DOWN	no	NO
AT3G54810	0.717993	5.94315	0.00215793	0.0404913	UP	no	NO
AT4G06744	-0.593136	3.98567	0.00215819	0.0404913	DOWN	no	NO
AT5G52640	0.715401	4.32618	0.00215915	0.0404913	UP	no	NO
AT4G08460	0.298622	5.50789	0.00216683	0.0405642	UP	no	NO
AT5G05410	0.656541	3.05924	0.00216723	0.0405642	UP	no	NO
AT1G05680	-1.59326	2.80372	0.00216774	0.0405642	DOWN	no	NO
AT3G06680	0.394892	4.35228	0.00216786	0.0405642	UP	no	NO
AT3G14920	-0.409121	4.20012	0.00217209	0.0406209	DOWN	no	NO
AT5G04930	-0.335872	5.41823	0.00217709	0.0406901	DOWN	no	YES	5:1448068:G-A;exonic_variant,5:1448068:G-A;protein_coding;missense;GAA>AAA;E>K
AT4G12545	-1.83359	2.17724	0.00217848	0.0406901	DOWN	no	NO
AT4G17240	0.425783	3.73998	0.00217942	0.0406901	UP	no	YES	4:9666689:TC-T;exonic_variant,4:9667453:T-TA;intronic_variant,4:9667734:AG-A;splice_acceptor_region_variant,4:9667734:AG-A;intronic_variant,4:9668369:G-GT;exonic_variant
AT3G44717	2.79406	-2.80586	0.00218221	0.0406976	UP	no	NO
AT5G45610	0.340883	4.31598	0.00218223	0.0406976	UP	no	NO
AT3G04310	-0.463357	2.96895	0.00218549	0.0407352	DOWN	no	NO
AT1G75670	0.560069	2.45378	0.00218736	0.0407352	UP	no	NO
AT2G01300	1.12155	0.80552	0.00218788	0.0407352	UP	no	NO
AT5G59270	-3.54762	-3.10616	0.00219061	0.0407635	DOWN	no	NO
AT5G48850	-1.66714	2.73748	0.00219346	0.0407926	DOWN	no	NO
AT2G35630	0.332543	7.02949	0.00219459	0.0407926	UP	no	NO
AT5G50750	1.141	-0.676702	0.00219909	0.0408536	UP	no	NO
AT1G72416	1.0108	3.4565	0.00220839	0.0410037	UP	no	NO
AT2G45100	0.451309	3.09718	0.0022188	0.0411744	UP	no	NO
AT1G08840	0.53386	3.0919	0.00222165	0.0412045	UP	no	NO
AT3G09010	-0.969058	0.0620634	0.00222389	0.0412233	DOWN	no	NO
AT2G28630	0.636515	4.47077	0.00223097	0.0413318	UP	no	NO
AT4G31120	0.393469	4.62822	0.00224003	0.0414642	UP	yes	NO
AT1G51745	0.344804	4.14316	0.00224171	0.0414642	UP	no	NO
AT5G17860	-0.496532	5.24913	0.00224181	0.0414642	DOWN	no	YES	5:5904429:G-GT;exonic_variant
AT1G31540	-0.366288	4.4759	0.00224958	0.0415852	DOWN	no	NO
AT1G66920	-1.0998	2.84076	0.00225227	0.041612	DOWN	no	NO
AT3G07360	0.360802	6.72003	0.00225823	0.0416993	UP	no	NO
AT5G10100	0.692545	2.77466	0.00226826	0.0418449	UP	no	NO
AT5G19900	-0.373513	4.69481	0.0022686	0.0418449	DOWN	no	NO
AT2G37025	0.634901	4.03598	0.00227288	0.0418656	UP	no	NO
AT5G47640	0.749802	6.074	0.00227344	0.0418656	UP	no	NO
AT2G46650	-0.899402	4.32047	0.00227345	0.0418656	DOWN	no	NO
AT3G51480	-0.399272	3.60146	0.00227842	0.0419341	DOWN	no	NO
AT1G71140	-0.848363	2.64304	0.00228116	0.0419616	DOWN	no	NO
AT5G49870	-1.93121	-0.742665	0.00228867	0.0420751	DOWN	no	NO
AT5G03220	0.365357	4.0312	0.00228983	0.0420751	UP	no	NO
AT3G07255	1.66915	-1.60619	0.00229312	0.0421127	UP	no	NO
AT4G05460	0.374905	3.8617	0.00229881	0.0421588	UP	no	NO
AT5G22140	-1.05004	2.32061	0.0022989	0.0421588	DOWN	no	NO
AT5G22760	-0.288706	5.48967	0.00229939	0.0421588	DOWN	no	NO
AT2G23780	-0.309596	4.99651	0.0023037	0.0421968	DOWN	no	NO
AT1G15930	0.346981	7.00203	0.00230397	0.0421968	UP	no	NO
AT2G26910	-0.299295	6.92209	0.00230963	0.0422736	DOWN	no	NO
AT2G36930	0.300833	5.51577	0.00231067	0.0422736	UP	no	NO
AT2G37460	-0.801207	3.06557	0.0023168	0.0423627	DOWN	no	NO
AT2G23110	0.827531	1.09228	0.00231854	0.0423655	UP	no	NO
AT4G14240	-0.36982	4.73895	0.00231947	0.0423655	DOWN	no	NO
AT4G39160	0.376315	4.33106	0.00232219	0.0423922	UP	no	NO
AT4G27090	0.335917	8.57332	0.00233474	0.0425764	UP	no	NO
AT4G36430	-2.12634	1.31267	0.00233505	0.0425764	DOWN	no	NO
AT5G44680	0.419805	6.51938	0.00233607	0.0425764	UP	no	NO
AT4G33950	0.32615	5.50786	0.00233881	0.0426033	UP	no	NO
AT5G12840	0.389435	5.51198	0.0023421	0.042633	UP	no	NO
AT2G36360	0.307789	4.81264	0.00234297	0.042633	UP	no	NO
AT4G11170	-4.35175	-3.16734	0.00234653	0.0426747	DOWN	no	NO
AT5G28020	-0.399392	5.7473	0.00235876	0.0428739	DOWN	no	NO
AT2G23810	0.500113	6.43158	0.00236564	0.0429706	UP	no	NO
AT5G05100	0.289357	6.01059	0.00236663	0.0429706	UP	no	NO
AT3G60740	0.339645	4.69883	0.00237945	0.0431197	UP	no	NO
AT5G25980	-0.734909	7.5451	0.00237992	0.0431197	DOWN	no	NO
AT3G59210	-0.339431	5.06538	0.00238242	0.0431197	DOWN	no	NO
AT5G02450	0.30479	7.0286	0.00238263	0.0431197	UP	no	NO
AT3G26850	-0.494332	2.64484	0.0023827	0.0431197	DOWN	no	NO
AT1G21140	-1.78667	0.102381	0.00238289	0.0431197	DOWN	no	NO
AT4G33650	0.290519	5.36455	0.0023838	0.0431197	UP	no	NO
AT3G45650	-0.70978	2.28717	0.00239034	0.0432147	DOWN	no	NO
AT3G17580	-1.01727	0.661405	0.00240006	0.0433671	DOWN	no	NO
AT1G30820	0.463064	5.42334	0.00240201	0.0433791	UP	no	NO
ATCG01040	2.04582	-2.41912	0.00240431	0.0433974	UP	no	NO
AT3G62580	-0.323123	5.37526	0.00240646	0.043413	DOWN	no	NO
AT1G67810	-1.53249	0.50152	0.00242001	0.0436341	DOWN	no	NO
AT5G24780	-1.26003	2.62374	0.0024337	0.0438573	DOWN	no	NO
AT4G18197	-0.648178	2.59061	0.00243665	0.0438871	DOWN	no	NO
AT1G30560	-4.39981	-2.51173	0.00244017	0.043927	DOWN	no	NO
AT1G23890	-0.397368	3.47843	0.00244919	0.0440658	DOWN	no	NO
AT5G10760	-1.80129	-0.0168454	0.00245218	0.044096	DOWN	no	NO
AT3G62720	0.703861	4.91402	0.00245537	0.0441299	UP	no	NO
AT3G13600	1.05899	0.202097	0.00245699	0.0441318	UP	no	NO
AT3G13120	-0.27155	7.68303	0.0024581	0.0441318	DOWN	no	NO
AT2G42610	-0.892373	3.01915	0.00246085	0.0441577	DOWN	no	NO
AT4G22360	0.325631	4.8476	0.00246548	0.0442172	UP	no	NO
AT5G47820	0.296591	6.22525	0.00246834	0.0442449	UP	no	NO
AT2G30480	0.385858	3.94619	0.00247354	0.0443146	UP	no	NO
AT3G44880	-0.356509	6.95311	0.00247502	0.0443175	DOWN	no	NO
AT4G22710	-3.09565	-0.336485	0.0024808	0.0443974	DOWN	no	NO
AT2G31980	0.776532	2.22744	0.00249291	0.0445904	UP	no	NO
AT4G02260	0.300539	7.1613	0.0024943	0.0445916	UP	no	NO
AT1G49570	-2.07068	3.22145	0.00250069	0.0446822	DOWN	no	NO
AT1G80610	0.471132	3.62254	0.00250313	0.044702	UP	no	NO
AT3G18770	-0.404055	3.4803	0.0025078	0.0447617	DOWN	no	NO
AT4G31500	-0.700915	6.53762	0.00251081	0.0447768	DOWN	no	NO
AT4G28690	-0.634143	1.61018	0.00251131	0.0447768	DOWN	no	NO
AT5G06760	1.1838	4.76067	0.00251279	0.0447796	UP	no	NO
AT1G55970	0.319001	4.33873	0.00251487	0.0447917	UP	no	NO
AT3G09940	-2.26701	1.4828	0.00251689	0.0447917	DOWN	no	NO
AT5G18230	0.276322	7.22879	0.00251746	0.0447917	UP	no	NO
AT5G15200	0.368141	8.36098	0.00252565	0.0449037	UP	no	NO
AT1G80630	0.355745	4.10204	0.00252642	0.0449037	UP	no	NO
AT5G58180	4.84778	-3.68277	0.00252883	0.0449139	UP	no	NO
AT5G50280	-0.323839	4.34561	0.00252967	0.0449139	DOWN	no	NO
AT4G35160	-0.796927	3.57333	0.00253119	0.0449173	DOWN	no	NO
AT5G58210	0.455464	3.30202	0.00254031	0.0450552	UP	no	NO
AT5G01600	-1.04111	8.82709	0.00254164	0.0450552	DOWN	no	NO
AT4G04350	0.289976	6.22143	0.00254504	0.0450917	UP	no	NO
AT2G23290	0.751458	4.02565	0.00254961	0.045149	UP	no	NO
AT5G44720	-0.515342	4.89441	0.00255166	0.0451615	DOWN	no	NO
AT3G10230	-0.289863	6.55577	0.00255561	0.0452078	DOWN	no	NO
AT1G76520	-0.667603	5.37902	0.00256552	0.0453591	DOWN	no	NO
AT4G23260	-0.875046	4.78621	0.00257211	0.0454519	DOWN	no	NO
AT5G16480	0.456224	3.93952	0.00257469	0.0454735	UP	no	NO
AT1G09560	-0.441073	5.35158	0.00257776	0.0454995	DOWN	no	YES	1:3094429:C-T;protein_coding;sense;CCC>CCT;P>P
AT4G01120	0.513371	4.86646	0.00257886	0.0454995	UP	no	NO
AT1G78000	-0.569408	4.49479	0.00258329	0.0455538	DOWN	no	NO
AT2G48070	-0.316015	5.66168	0.00258547	0.0455684	DOWN	no	NO
AT2G18550	1.14389	1.62151	0.00259213	0.0456619	UP	no	NO
AT5G49470	0.332533	4.61174	0.00259623	0.0457103	UP	no	NO
AT5G23840	-2.15609	-0.175737	0.00259784	0.0457147	DOWN	no	NO
AT4G37080	0.364079	5.26726	0.00260945	0.0458732	UP	no	YES	4:17477062:T-TA;exonic_variant,4:17475146:G-A;exonic_variant,4:17475146:G-A;protein_coding;sense;AAG>AAA;K>K
AT1G13210	-0.601801	4.50885	0.00260957	0.0458732	DOWN	no	NO
AT3G15120	-0.309989	4.84973	0.00261269	0.045904	DOWN	no	NO
AT4G03110	0.377679	5.28027	0.00261775	0.0459499	UP	no	NO
AT3G20200	-0.580141	1.86519	0.00261803	0.0459499	DOWN	no	NO
AT1G05820	0.547216	1.70978	0.00262026	0.0459651	UP	no	NO
AT1G73950	-0.360961	3.95594	0.00262559	0.0460346	DOWN	no	YES	1:27804140:C-T;intronic_variant
AT5G19880	-1.99886	-2.45112	0.00263202	0.0461234	DOWN	no	NO
AT1G29900	0.336815	6.61854	0.00263389	0.0461235	UP	no	NO
AT1G10540	-0.939306	-0.0109806	0.00263616	0.0461235	DOWN	no	NO
AT1G69920	-4.05076	-1.77689	0.00263646	0.0461235	DOWN	no	YES	1:26334749:C-T;splice_acceptor_variant
AT3G12250	0.366104	3.82008	0.0026375	0.0461235	UP	no	NO
AT3G54230	0.283905	6.28234	0.00264171	0.0461677	UP	yes	NO
AT1G15180	0.29501	5.69543	0.00264278	0.0461677	UP	no	NO
AT2G31560	-0.376391	5.1064	0.00264585	0.0461975	DOWN	no	NO
AT5G08330	0.479796	5.68808	0.00265414	0.0463181	UP	no	NO
AT1G75230	0.581713	4.23386	0.00266523	0.0464877	UP	no	NO
AT3G14220	-0.436594	5.02176	0.00266834	0.0465022	DOWN	no	NO
AT5G20600	0.346636	4.29724	0.00266995	0.0465022	UP	no	NO
AT5G27395	0.449752	3.52181	0.00267021	0.0465022	UP	no	NO
AT3G62100	0.920975	0.131735	0.00267953	0.0466404	UP	no	NO
AT3G54590	-0.993737	4.71464	0.00268655	0.0467386	DOWN	no	NO
AT4G29690	-2.19985	1.34219	0.00269306	0.0468215	DOWN	no	NO
AT2G42030	0.316125	5.39323	0.00269411	0.0468215	UP	no	NO
AT2G36400	0.414933	5.14545	0.00270193	0.0469333	UP	no	NO
AT2G06010	0.328254	4.55724	0.00270631	0.0469851	UP	no	NO
AT3G44300	-0.657984	4.03595	0.00271242	0.047067	DOWN	no	NO
AT4G25960	0.308553	6.03384	0.00271899	0.0471566	UP	no	NO
AT1G48090	-0.290628	6.7403	0.00272421	0.0471989	DOWN	no	NO
AT1G75290	-0.999282	-0.61634	0.00272422	0.0471989	DOWN	no	NO
AT3G25290	-0.719553	3.62202	0.00273052	0.0472836	DOWN	no	NO
AT5G18110	0.300115	5.94912	0.00274004	0.0474241	UP	no	NO
AT5G47220	0.911578	5.38977	0.00275728	0.047698	UP	no	NO
AT3G27884	-0.956936	1.33998	0.00276691	0.04784	DOWN	no	NO
AT5G35735	-0.705949	3.87328	0.00276934	0.0478441	DOWN	no	NO
AT5G07330	1.31046	0.134516	0.00276999	0.0478441	UP	no	NO
AT1G80310	0.377945	5.44628	0.00278198	0.0480266	UP	no	NO
AT5G04590	-0.387814	7.73007	0.00278791	0.0481043	DOWN	no	NO
AT5G26180	0.379558	3.80306	0.00279148	0.0481413	UP	no	NO
AT3G28100	-0.354034	4.9155	0.00279543	0.0481847	DOWN	no	NO
AT5G28840	0.302513	8.58139	0.00280485	0.0483076	UP	no	NO
AT5G54090	-0.376352	3.73974	0.00280543	0.0483076	DOWN	no	NO
AT3G02260	-0.314471	7.05786	0.00281098	0.0483784	DOWN	no	NO
AT5G67390	-0.466382	3.92902	0.0028176	0.0484676	DOWN	no	NO
ATCG01130	0.79798	1.30068	0.00282015	0.0484867	UP	no	NO
AT4G19670	-0.323826	5.04097	0.00282862	0.0486075	DOWN	no	NO
AT1G44125	-0.50996	2.67332	0.00283578	0.0487057	DOWN	no	NO
AT3G01590	0.303957	5.22341	0.00284528	0.0488316	UP	no	NO
AT1G50735	5.06601	-3.71491	0.00284601	0.0488316	UP	no	NO
AT1G80300	0.321436	6.38877	0.00287894	0.0493715	UP	no	NO
AT5G47860	-0.34097	5.61195	0.00288443	0.0494405	DOWN	no	NO
AT2G25690	-0.52383	2.75682	0.0028944	0.0495862	DOWN	no	NO
AT5G01400	0.288582	5.64891	0.00290199	0.0496684	UP	no	NO
AT2G46220	0.294889	8.25319	0.00290351	0.0496684	UP	no	NO
AT1G13700	0.464326	4.4734	0.00290363	0.0496684	UP	no	NO
AT1G52342	0.513309	5.26724	0.00291167	0.0497807	UP	no	NO
AT5G39190	0.46237	4.49897	0.00292419	0.0499694	UP	no	NO

## Sheet: All cwc16a alleles
Gene ID	Direction of change	description	comp_description	IPR_domain
AT1G01240	DOWN		unknown protein; BEST Arabidopsis thaliana protein match is: unknown protein (TAIR:AT2G46550.1); INVOLVED IN: N-terminal protein myristoylation; EXPRESSED IN: 17 plant structures; EXPRESSED DURING: 11 growth stages
AT1G01420	DOWN	UDP-glucosyl transferase 72B3	UDP-glucosyl transferase 72B3 (UGT72B3); FUNCTIONS IN: quercetin 3-O-glucosyltransferase activity, UDP-glycosyltransferase activity, transferase activity, transferring glycosyl groups; INVOLVED IN: metabolic process; LOCATED IN: cellular_component unknown; EXPRESSED IN: 11 plant structures; EXPRESSED DURING: LP.04 four leaves visible, petal differentiation and expansion stage; CONTAINS InterPro D…	UDP-glucuronosyl/UDP-glucosyltransferase
AT1G01510	UP	NAD(P)-binding Rossmann-fold superfamily protein	ANGUSTIFOLIA (AN); CONTAINS InterPro DOMAIN/s: D-isomer specific 2-hydroxyacid dehydrogenase, NAD-binding (InterPro:IPR006140), NAD(P)-binding domain (InterPro:IPR016040); BEST Arabidopsis thaliana protein match is: D-isomer specific 2-hydroxyacid dehydrogenase family protein (TAIR:AT1G12550.1)	D-isomer specific 2-hydroxyacid dehydrogenase, NAD-binding domain | NAD(P)-binding domain
AT1G01620	UP	plasma membrane intrinsic protein 1C	plasma membrane intrinsic protein 1C (PIP1C); FUNCTIONS IN: water channel activity; INVOLVED IN: response to water deprivation, response to salt stress, transport, water transport; LOCATED IN: plasma membrane, chloroplast, membrane; LOCATED IN: plasma membrane, membrane; EXPRESSED IN: 22 plant structures; EXPRESSED DURING: 14 growth stages; CONTAINS InterPro DOMAIN/s: Major intrinsic protein, con…	Aquaporin-like | Major intrinsic protein | Major intrinsic protein, conserved site
AT1G01950	UP	armadillo repeat kinesin 2	armadillo repeat kinesin 2 (ARK2); FUNCTIONS IN: microtubule motor activity, binding, ATP binding; INVOLVED IN: root development; LOCATED IN: chloroplast; EXPRESSED IN: 23 plant structures; EXPRESSED DURING: 13 growth stages; CONTAINS InterPro DOMAIN/s: Kinesin, motor region, conserved site (InterPro:IPR019821), Armadillo-like helical (InterPro:IPR011989), Armadillo (InterPro:IPR000225), Armadill…	Armadillo | Armadillo-like helical | Armadillo-type fold | Kinesin, motor domain | Kinesin, motor region, conserved site | Kinesin-like protein | P-loop containing nucleoside triphosphate hydrolase
AT1G02475	DOWN	Polyketide cyclase/dehydrase and lipid transport superfamily protein	Polyketide cyclase/dehydrase and lipid transport superfamily protein; FUNCTIONS IN: molecular_function unknown; INVOLVED IN: biological_process unknown; LOCATED IN: chloroplast; EXPRESSED IN: 22 plant structures; EXPRESSED DURING: 13 growth stages; CONTAINS InterPro DOMAIN/s: Streptomyces cyclase/dehydrase (InterPro:IPR005031); BEST Arabidopsis thaliana protein match is: Polyketide cyclase / dehy…	START-like domain | Streptomyces cyclase/dehydrase
AT1G02610	UP	RING/FYVE/PHD zinc finger superfamily protein	RING/FYVE/PHD zinc finger superfamily protein; FUNCTIONS IN: zinc ion binding; CONTAINS InterPro DOMAIN/s: Protein of unknown function DUF3675 (InterPro:IPR022143), Zinc finger, C3HC4 RING-type (InterPro:IPR018957), Zinc finger, RING-CH-type (InterPro:IPR011016); BEST Arabidopsis thaliana protein match is: RING/FYVE/PHD zinc finger superfamily protein (TAIR:AT4G02075.1)	Protein of unknown function DUF3675 | Zinc finger, RING-CH-type | Zinc finger, RING/FYVE/PHD-type
AT1G02660	UP	alpha/beta-Hydrolases superfamily protein	alpha/beta-Hydrolases superfamily protein; FUNCTIONS IN: triglyceride lipase activity; INVOLVED IN: lipid metabolic process; LOCATED IN: cellular_component unknown; EXPRESSED IN: 24 plant structures; EXPRESSED DURING: 15 growth stages; CONTAINS InterPro DOMAIN/s: Lipase, class 3 (InterPro:IPR002921); BEST Arabidopsis thaliana protein match is: alpha/beta-Hydrolases superfamily protein (TAIR:AT3G6…	Alpha/Beta hydrolase fold | Fungal lipase-like domain
AT1G02670	UP	P-loop containing nucleoside triphosphate hydrolases superfamily protein	P-loop containing nucleoside triphosphate hydrolases superfamily protein; FUNCTIONS IN: helicase activity, DNA binding, ATP binding, nucleic acid binding; INVOLVED IN: DNA repair; LOCATED IN: cellular_component unknown; EXPRESSED IN: 7 plant structures; EXPRESSED DURING: F mature embryo stage, petal differentiation and expansion stage, E expanded cotyledon stage, D bilateral stage; CONTAINS Inter…	Helicase, C-terminal | Helicase, superfamily 1/2, ATP-binding domain | P-loop containing nucleoside triphosphate hydrolase | SNF2-related
AT1G02860	UP	SPX (SYG1/Pho81/XPR1) domain-containing protein	nitrogen limitation adaptation (NLA); CONTAINS InterPro DOMAIN/s: Zinc finger, RING-type, conserved site (InterPro:IPR017907), Zinc finger, RING-type (InterPro:IPR001841), SPX, N-terminal (InterPro:IPR004331); BEST Arabidopsis thaliana protein match is: SPX (SYG1/Pho81/XPR1) domain-containing protein / zinc finger (C3HC4-type RING finger) protein-related (TAIR:AT2G38920.1); BEST Arabidopsis thali…	SPX, N-terminal | Zinc finger, RING-type | Zinc finger, RING-type, conserved site | Zinc finger, RING/FYVE/PHD-type
AT1G03090	UP	methylcrotonyl-CoA carboxylase alpha chain, mitochondrial / 3-methylcrotonyl-CoA carboxylase 1 (MCCA)	MCCA; FUNCTIONS IN: cobalt ion binding, methylcrotonoyl-CoA carboxylase activity; INVOLVED IN: leucine catabolic process; LOCATED IN: mitochondrion, cytosolic ribosome; EXPRESSED IN: 26 plant structures; EXPRESSED DURING: 13 growth stages; CONTAINS InterPro DOMAIN/s: Single hybrid motif (InterPro:IPR011053), Biotin/lipoyl attachment (InterPro:IPR000089), Carbamoyl phosphate synthase, large subuni…	ATP-grasp fold | ATP-grasp fold, subdomain 1 | ATP-grasp fold, subdomain 2 | Biotin carboxylase, C-terminal | Biotin carboxylation domain | Biotin-binding site | Biotin/lipoyl attachment | Carbamoyl-phosphate synthase, large subunit, N-terminal | Carbamoyl-phosphate synthetase large subunit-like, ATP-binding domain | Pre-ATP-grasp domain | Rudiment single hybrid motif | Single hybrid motif
AT1G03130	DOWN	photosystem I subunit D-2	photosystem I subunit D-2 (PSAD-2); FUNCTIONS IN: molecular_function unknown; INVOLVED IN: photosynthesis; LOCATED IN: in 6 components; EXPRESSED IN: 23 plant structures; EXPRESSED DURING: 14 growth stages; CONTAINS InterPro DOMAIN/s: Photosystem I protein PsaD (InterPro:IPR003685); BEST Arabidopsis thaliana protein match is: photosystem I subunit D-1 (TAIR:AT4G02770.1)	Photosystem I PsaD
AT1G03190	UP	RAD3-like DNA-binding helicase protein	ULTRAVIOLET HYPERSENSITIVE 6 (UVH6); FUNCTIONS IN: in 6 functions; INVOLVED IN: DNA repair, response to UV, response to heat; LOCATED IN: nucleus; EXPRESSED IN: 25 plant structures; EXPRESSED DURING: 14 growth stages; CONTAINS InterPro DOMAIN/s: Helicase, superfamily 1/2, ATP-binding domain, DinG/Rad3-type (InterPro:IPR014013), Xeroderma pigmentosum group D protein (InterPro:IPR001945), Helicase-…	ATP-dependent helicase, C-terminal | DEAD2 | DNA helicase (DNA repair), Rad3 type | DNA/RNA helicase, ATP-dependent, DEAH-box type, conserved site | Domain of unknown function DUF1227 | Helicase, superfamily 1/2, ATP-binding domain, DinG/Rad3-type | Helicase-like, DEXD box c2 type | P-loop containing nucleoside triphosphate hydrolase | Xeroderma pigmentosum group D protein
AT1G03410	DOWN	2-oxoglutarate (2OG) and Fe(II)-dependent oxygenase superfamily protein	2A6; FUNCTIONS IN: oxidoreductase activity; LOCATED IN: endomembrane system; EXPRESSED IN: 17 plant structures; EXPRESSED DURING: 10 growth stages; CONTAINS InterPro DOMAIN/s: Oxoglutarate/iron-dependent oxygenase (InterPro:IPR005123); BEST Arabidopsis thaliana protein match is: 2-oxoglutarate (2OG) and Fe(II)-dependent oxygenase superfamily protein (TAIR:AT1G03400.1)	Isopenicillin N synthase-like | Non-haem dioxygenase N-terminal domain | Oxoglutarate/iron-dependent dioxygenase
AT1G03580	UP		pseudogene, meprin and TRAF homology (MATH) domain protein -related, weak similarity to ubiquitin-specific protease 12 (Arabidopsis thaliana) GI:11993471; contains weak hit to Pfam PF00917: MATH domain
AT1G03610	UP	Protein of unknown function (DUF789)	Protein of unknown function (DUF789); CONTAINS InterPro DOMAIN/s: Protein of unknown function DUF789 (InterPro:IPR008507); BEST Arabidopsis thaliana protein match is: Protein of unknown function (DUF789) (TAIR:AT4G03420.1)	Protein of unknown function DUF789
AT1G03860	UP	prohibitin 2	prohibitin 2 (PHB2); INVOLVED IN: biological_process unknown; LOCATED IN: in 7 components; LOCATED IN: in 8 components; EXPRESSED IN: 30 plant structures; EXPRESSED DURING: 14 growth stages; CONTAINS InterPro DOMAIN/s: Prohibitin (InterPro:IPR000163), Band 7 protein (InterPro:IPR001107); BEST Arabidopsis thaliana protein match is: prohibitin 1 (TAIR:AT4G28510.1); BEST Arabidopsis thaliana protein…	Band 7 protein | Prohibitin
AT1G04240	UP	AUX/IAA transcriptional regulator family protein	SHORT HYPOCOTYL 2 (SHY2); FUNCTIONS IN: sequence-specific DNA binding transcription factor activity; INVOLVED IN: response to auxin stimulus, response to cyclopentenone, response to brassinosteroid stimulus; LOCATED IN: nucleus; EXPRESSED IN: 22 plant structures; EXPRESSED DURING: 13 growth stages; CONTAINS InterPro DOMAIN/s: Aux/IAA-ARF-dimerisation (InterPro:IPR011525), AUX/IAA protein (InterPr…
AT1G04730	UP	P-loop containing nucleoside triphosphate hydrolases superfamily protein	CHROMOSOME TRANSMISSION FIDELITY 18 (CTF18); FUNCTIONS IN: nucleoside-triphosphatase activity, ATPase activity, nucleotide binding, ATP binding; INVOLVED IN: sister chromatid cohesion; LOCATED IN: replication fork; EXPRESSED IN: 25 plant structures; EXPRESSED DURING: 13 growth stages; CONTAINS InterPro DOMAIN/s: ATPase, AAA+ type, core (InterPro:IPR003593), ATPase, AAA-type, core (InterPro:IPR003…	AAA+ ATPase domain | ATPase, AAA-type, core | P-loop containing nucleoside triphosphate hydrolase
AT1G05180	UP	NAD(P)-binding Rossmann-fold superfamily protein	AUXIN RESISTANT 1 (AXR1); CONTAINS InterPro DOMAIN/s: Molybdenum cofactor biosynthesis, MoeB (InterPro:IPR009036), NAD(P)-binding domain (InterPro:IPR016040); CONTAINS InterPro DOMAIN/s: Molybdenum cofactor biosynthesis, MoeB (InterPro:IPR009036), UBA/THIF-type NAD/FAD binding fold (InterPro:IPR000594), NAD(P)-binding domain (InterPro:IPR016040); BEST Arabidopsis thaliana protein match is: AXR1-l…	Molybdenum cofactor biosynthesis, MoeB | NAD(P)-binding domain | UBA/THIF-type NAD/FAD binding fold
AT1G05340	UP		unknown protein; FUNCTIONS IN: molecular_function unknown; INVOLVED IN: biological_process unknown; LOCATED IN: chloroplast; EXPRESSED IN: 14 plant structures; EXPRESSED DURING: 7 growth stages; BEST Arabidopsis thaliana protein match is: unknown protein (TAIR:AT2G32210.1)	Cysteine-rich transmembrane CYSTM domain
AT1G05560	DOWN	UDP-glucosyltransferase 75B1	UDP-glucosyltransferase 75B1 (UGT75B1); CONTAINS InterPro DOMAIN/s: UDP-glucuronosyl/UDP-glucosyltransferase (InterPro:IPR002213); BEST Arabidopsis thaliana protein match is: UDP-glucosyl transferase 75B2 (TAIR:AT1G05530.1)
AT1G06360	UP	Fatty acid desaturase family protein	Fatty acid desaturase family protein; FUNCTIONS IN: oxidoreductase activity, oxidoreductase activity, acting on paired donors, with oxidation of a pair of donors resulting in the reduction of molecular oxygen to two molecules of water; INVOLVED IN: oxidation reduction, lipid metabolic process; CONTAINS InterPro DOMAIN/s: Fatty acid desaturase, type 1, core (InterPro:IPR015876), Fatty acid desatur…	Fatty acid desaturase, type 1 | Fatty acid desaturase, type 1, core
AT1G06560	UP	NOL1/NOP2/sun family protein	NOL1/NOP2/sun family protein; FUNCTIONS IN: methyltransferase activity, RNA binding; INVOLVED IN: biological_process unknown; LOCATED IN: cellular_component unknown; EXPRESSED IN: 23 plant structures; EXPRESSED DURING: 13 growth stages; CONTAINS InterPro DOMAIN/s: Bacterial Fmu (Sun)/eukaryotic nucleolar NOL1/Nop2p (InterPro:IPR001678), Pseudouridine synthase/archaeosine transglycosylase-like (In…	Bacterial Fmu (Sun)/eukaryotic nucleolar NOL1/Nop2p | Bacterial Fmu (Sun)/eukaryotic nucleolar NOL1/Nop2p, conserved site | PUA domain | PUA-like domain | RNA (C5-cytosine) methyltransferase | S-adenosyl-L-methionine-dependent methyltransferase-like
AT1G06590	UP		unknown protein	Apc5/TPR19 domain | Tetratricopeptide-like helical domain
AT1G06630	UP	F-box/RNI-like superfamily protein	F-box/RNI-like superfamily protein; FUNCTIONS IN: molecular_function unknown; INVOLVED IN: biological_process unknown; LOCATED IN: cellular_component unknown; EXPRESSED IN: 24 plant structures; EXPRESSED DURING: 13 growth stages; CONTAINS InterPro DOMAIN/s: F-box domain, cyclin-like (InterPro:IPR001810), F-box domain, Skp2-like (InterPro:IPR022364); BEST Arabidopsis thaliana protein match is: F-b…	F-box domain
AT1G06720	UP	P-loop containing nucleoside triphosphate hydrolases superfamily protein	P-loop containing nucleoside triphosphate hydrolases superfamily protein; FUNCTIONS IN: GTP binding, GTPase activity; INVOLVED IN: ribosome biogenesis; LOCATED IN: nucleus; EXPRESSED IN: 21 plant structures; EXPRESSED DURING: 13 growth stages; CONTAINS InterPro DOMAIN/s: AARP2CN (InterPro:IPR012948), Protein synthesis factor, GTP-binding (InterPro:IPR000795), Protein of unknown function DUF663 (I…	AARP2CN | Elongation factor, GTP-binding domain | P-loop containing nucleoside triphosphate hydrolase | Ribosome biogenesis protein BMS1/TSR1, C-terminal
AT1G06760	DOWN	winged-helix DNA-binding transcription factor family protein	winged-helix DNA-binding transcription factor family protein; FUNCTIONS IN: DNA binding; INVOLVED IN: nucleosome assembly; LOCATED IN: nucleus, nucleosome; EXPRESSED IN: 23 plant structures; EXPRESSED DURING: 13 growth stages; CONTAINS InterPro DOMAIN/s: Winged helix-turn-helix transcription repressor DNA-binding (InterPro:IPR011991), Histone H5 (InterPro:IPR005819), Histone H1/H5 (InterPro:IPR00…	Histone H5 | Linker histone H1/H5, domain H15 | Winged helix-turn-helix DNA-binding domain
AT1G07135	UP	glycine-rich protein	glycine-rich protein
AT1G07400	UP	HSP20-like chaperones superfamily protein	HSP20-like chaperones superfamily protein; CONTAINS InterPro DOMAIN/s: Heat shock protein Hsp20 (InterPro:IPR002068), HSP20-like chaperone (InterPro:IPR008978); BEST Arabidopsis thaliana protein match is: HSP20-like chaperones superfamily protein (TAIR:AT1G59860.1)	Alpha crystallin/Hsp20 domain | HSP20-like chaperone
AT1G07840	UP	Sas10/Utp3/C1D family	Sas10/Utp3/C1D family; CONTAINS InterPro DOMAIN/s: Sas10/Utp3/C1D (InterPro:IPR007146); BEST Arabidopsis thaliana protein match is: Sas10/U3 ribonucleoprotein (Utp) family protein (TAIR:AT2G43650.1)	Sas10/Utp3/C1D
AT1G07985	UP	Expressed protein	Expressed protein; FUNCTIONS IN: molecular_function unknown; INVOLVED IN: biological_process unknown; LOCATED IN: chloroplast
[truncated: 909 more rows]

## Sheet: Koncz_Share
Gene ID	Direction of change	Category	Protein annotation
[truncated: 14 more rows]

[truncated: 6 more sheets: GO_share_cwc16a_up_C, GO_share_cwc16a_up_F, GO_share_cwc16a_up_P, GO_share_cwc16a_down_C, GO_share_cwc16a_down_F, GO_share_cwc16a_down_P]
